# Supplementary material for: The genome of C57BL/6J “Eve”, the mother of the laboratory mouse genome reference strain
Source: bioRxiv preprint, doi:10.1101/517466, version 1 (2019-01-11)
Supplement: Supplementary Table 3 [file 517466_file08.xlsx]

## Sheet: Summary
#TranscriptAccession	NCBIGeneID	GRCm38_split_align	GRCm38_low_CDS	GRCm38_not_found	GRCm38_dropped	Eve2_split_align	Eve2_low_CDS	Eve2_not_found	Eve2_dropped
NM_013454.3	11303	N	N	N	N	Y	Y	N	N
NM_001034013.2	11418	N	N	N	N	Y	Y	N	N
NM_007400.2	11489	N	N	N	N	Y	Y	N	N
NM_001007220.3	11496	N	N	N	N	Y	Y	N	N
NM_001007221.3	11496	N	N	N	N	Y	Y	N	N
NM_001098225.2	11496	N	N	N	N	Y	Y	N	N
NM_001310439.1	11496	N	N	N	N	Y	Y	N	N
NM_001310440.1	11496	N	N	N	N	Y	Y	N	N
NM_001272057.1	11499	N	N	N	N	Y	Y	N	N
NM_001272058.1	11499	N	N	N	N	Y	Y	N	N
NM_001272059.1	11499	N	N	N	N	Y	Y	N	N
NM_007401.3	11499	N	N	N	N	Y	Y	N	N
NM_001291910.1	11515	N	N	N	N	Y	Y	N	N
NM_009624.3	11515	N	N	N	N	Y	Y	N	N
NM_177322.3	11607	N	N	N	N	Y	N	N	N
NM_007439.2	11682	N	N	N	N	Y	Y	N	N
NM_007442.3	11695	N	N	N	N	Y	Y	N	N
NM_009680.3	11774	N	N	N	N	Y	N	N	N
NM_001042558.1	11783	N	N	N	N	Y	Y	N	N
NM_001282947.1	11783	N	N	N	N	Y	Y	N	N
NM_009684.2	11783	N	N	N	N	Y	Y	N	N
NM_013476.4	11835	N	N	N	N	Y	Y	N	N
NM_009705.3	11847	N	N	N	N	Y	Y	N	N
NM_001287530.1	11856	N	N	N	N	Y	Y	N	N
NM_009707.4	11856	N	N	N	N	Y	Y	N	N
NM_178754.3	11856	N	N	N	N	Y	Y	N	N
NR_109847.1	11856	N	N	N	N	Y	N	N	N
NM_001029895.3	11907	N	N	N	N	Y	Y	N	N
NM_001136054.2	11907	N	N	N	N	Y	Y	N	N
NM_001271343.1	11907	N	N	N	N	Y	Y	N	N
NM_013799.3	11907	N	N	N	N	Y	Y	N	N
NM_001038999.2	11980	N	N	N	N	Y	Y	N	N
NM_001284345.1	11980	N	N	N	N	Y	Y	N	N
NM_009727.3	11980	N	N	N	N	Y	Y	N	N
NM_001142735.1	11994	N	N	N	N	Y	Y	N	N
NM_001142736.1	11994	N	N	N	N	Y	Y	N	N
NM_001142737.1	11994	N	N	N	N	Y	Y	N	N
NM_001142738.1	11994	N	N	N	N	Y	Y	N	N
NM_001142739.1	11994	N	N	N	N	Y	Y	N	N
NM_001142740.1	11994	N	N	N	N	Y	Y	N	N
NM_001142741.1	11994	N	N	N	N	Y	Y	N	N
NM_001142742.1	11994	N	N	N	N	Y	Y	N	N
NM_001142743.1	11994	N	N	N	N	Y	Y	N	N
NM_001142746.1	11994	N	N	N	N	Y	Y	N	N
NM_001142747.1	11994	N	N	N	N	Y	Y	N	N
NM_001142748.1	11994	N	N	N	N	Y	Y	N	N
NM_001142760.1	11994	N	N	N	N	Y	Y	N	N
NM_023115.3	11994	N	N	N	N	Y	Y	N	N
NM_007525.3	12021	N	N	N	N	Y	Y	N	N
NM_007536.2	12047	N	N	N	N	N	N	N	Y
NM_001112796.2	12121	N	N	N	N	Y	Y	N	N
NM_009753.4	12121	N	N	N	N	Y	Y	N	N
NM_009763.3	12182	N	N	N	N	Y	Y	N	N
NM_016704.2	12274	N	N	N	N	Y	Y	N	N
NM_009782.3	12290	N	N	N	N	Y	Y	N	N
NM_001110843.1	12293	N	N	N	N	Y	Y	N	N
NM_001110844.1	12293	N	N	N	N	Y	Y	N	N
NM_001110845.1	12293	N	N	N	N	Y	Y	N	N
NM_001110846.1	12293	N	N	N	N	Y	Y	N	N
NM_009784.2	12293	N	N	N	N	Y	Y	N	N
NM_007592.3	12319	N	N	N	N	Y	Y	N	N
NM_009793.3	12326	N	N	N	N	Y	Y	N	N
NM_009808.4	12364	N	N	N	N	Y	N	N	N
NM_007611.2	12369	N	N	N	N	N	Y	N	N
NM_001301153.1	12380	N	N	N	N	Y	Y	N	N
NM_001301155.1	12380	N	N	N	N	Y	Y	N	N
NM_001301156.1	12380	N	N	N	N	Y	Y	N	N
NM_001301157.1	12380	N	N	N	N	Y	Y	N	N
NM_001301158.1	12380	N	N	N	N	Y	Y	N	N
NM_001301160.1	12380	N	N	N	N	Y	Y	N	N
NM_001301181.1	12380	N	N	N	N	Y	Y	N	N
NM_009817.4	12380	N	N	N	N	Y	Y	N	N
NM_001109764.1	12386	N	N	N	N	Y	Y	N	N
NM_009819.2	12386	N	N	N	N	Y	Y	N	N
NM_145732.2	12386	N	N	N	N	Y	Y	N	N
NM_009838.2	12466	Y	Y	N	N	N	N	N	N
NM_001159555.1	12491	N	N	N	N	Y	Y	N	N
NM_001159556.1	12491	N	N	N	N	Y	Y	N	N
NM_001159557.1	12491	N	N	N	N	Y	Y	N	N
NM_001159558.1	12491	N	N	N	N	Y	Y	N	N
NM_007643.4	12491	N	N	N	N	Y	Y	N	N
NM_001289470.1	12523	N	N	N	N	Y	Y	N	N
NM_013489.3	12523	N	N	N	N	Y	Y	N	N
NM_009888.3	12628	N	N	N	N	Y	Y	N	N
NM_007697.2	12661	N	N	N	N	Y	N	N	N
NM_018818.2	12662	N	N	N	N	Y	Y	N	N
NM_033269.4	12671	N	N	N	N	Y	N	N	N
NM_001005787.1	12695	N	N	N	N	Y	Y	N	N
NM_007704.2	12695	N	N	N	N	Y	Y	N	N
NM_172696.2	12695	N	N	N	N	Y	Y	N	N
NM_001289826.1	12753	N	N	N	N	Y	Y	N	N
NM_001305222.1	12753	N	N	N	N	Y	Y	N	N
NM_007715.6	12753	N	N	N	N	Y	Y	N	N
NM_007729.3	12814	N	N	N	N	Y	N	N	N
NM_007733.2	12823	N	N	N	N	Y	Y	N	N
NM_001163155.1	12830	N	N	N	N	Y	Y	N	N
NM_007736.4	12830	N	N	N	N	Y	Y	N	N
NM_007754.2	12874	N	N	N	N	Y	Y	N	N
NM_007766.2	12936	N	N	N	N	Y	Y	N	N
NM_007767.3	12937	N	N	N	N	Y	Y	N	N
NM_009957.1	12939	N	N	N	N	Y	Y	N	N
NM_009959.1	12941	N	N	N	N	Y	Y	N	N
NM_009960.1	12942	N	N	N	N	Y	Y	N	N
NM_009961.1	12943	N	N	N	N	Y	Y	N	N
NM_009988.4	13052	N	N	N	N	Y	N	N	N
NM_007812.4	13087	N	N	N	N	N	N	N	Y
NM_010002.3	13097	N	N	N	N	Y	Y	N	N
NM_010003.2	13098	N	N	N	N	Y	Y	N	N
NM_010004.2	13099	N	N	N	N	Y	Y	N	N
NM_007820.2	13114	N	N	N	N	Y	Y	N	N
NM_172306.2	13118	N	N	N	N	Y	Y	N	N
NM_001317361.1	13137	N	N	N	N	N	Y	N	N
NM_007827.3	13137	N	N	N	N	N	Y	N	N
NM_001190451.2	13179	N	N	N	N	Y	N	N	N
NM_010031.2	13216	N	N	N	N	Y	Y	N	N
NM_007845.3	13219	N	Y	N	N	N	Y	N	N
NM_007846.1	13221	N	Y	N	N	N	Y	N	N
NM_007847.1	13222	N	Y	N	N	N	Y	N	N
NM_001005418.1	13223	N	Y	N	N	N	Y	N	N
NM_010039.2	13238	N	Y	N	N	N	Y	N	N
NM_007852.1	13240	N	N	N	Y	N	N	N	Y
NM_007868.6	13405	N	N	N	N	Y	Y	N	N
NM_001136060.2	13483	N	N	N	N	Y	Y	N	N
NM_001198886.1	13483	N	N	N	N	Y	Y	N	N
NM_010075.2	13483	N	N	N	N	Y	Y	N	N
NM_207282.3	13483	N	N	N	N	Y	Y	N	N
NM_010084.2	13524	N	N	N	N	Y	Y	N	N
NR_136908.1	13524	N	N	N	N	Y	N	N	N
NM_001177937.1	13607	N	N	N	N	Y	Y	N	N
NM_001177938.1	13607	N	N	N	N	Y	Y	N	N
NM_001177939.1	13607	N	N	N	N	Y	Y	N	N
NM_001177940.1	13607	N	N	N	N	Y	Y	N	N
NM_001177941.1	13607	N	N	N	N	Y	Y	N	N
NM_001177942.1	13607	N	N	N	N	Y	Y	N	N
NM_001177943.1	13607	N	N	N	N	Y	Y	N	N
NM_001177944.1	13607	N	N	N	N	Y	Y	N	N
NM_010099.2	13607	N	N	N	N	Y	Y	N	N
NM_001037987.3	13612	N	N	N	N	N	Y	N	N
NM_010103.4	13612	N	N	N	N	N	Y	N	N
NM_010115.6	13647	N	N	N	N	N	N	N	Y
NM_010130.4	13733	N	N	N	N	Y	Y	N	N
NM_007936.3	13838	N	N	N	N	Y	Y	N	N
NM_007938.2	13840	N	N	N	N	Y	Y	N	N
NM_010146.2	13853	N	N	N	N	Y	Y	N	N
NM_010154.2	13869	N	N	N	N	Y	Y	N	N
NM_001302531.1	13982	N	N	N	N	Y	Y	N	N
NM_001302532.1	13982	N	N	N	N	Y	Y	N	N
NM_001302533.1	13982	N	N	N	N	Y	Y	N	N
NM_007956.5	13982	N	N	N	N	Y	Y	N	N
NM_001253392.1	13990	N	N	N	N	Y	Y	N	N
NM_007958.1	13990	N	N	N	N	Y	Y	N	N
NM_010158.2	13992	N	N	N	N	Y	Y	N	N
NM_007963.2	14013	N	N	N	N	Y	Y	N	N
NM_001163394.1	14026	N	N	N	N	Y	N	N	N
NM_007965.3	14026	N	N	N	N	Y	N	N	N
NM_001161373.1	14069	N	N	N	N	Y	Y	N	N
NM_001161374.1	14069	N	N	N	N	Y	Y	N	N
NM_007977.2	14069	N	N	N	N	Y	Y	N	N
NM_001276419.2	14167	N	N	N	N	Y	Y	N	N
NM_010199.4	14167	N	N	N	N	N	Y	N	N
NM_183064.5	14167	N	N	N	N	N	Y	N	N
NM_001290414.1	14168	N	N	N	N	Y	Y	N	N
NM_207667.3	14169	N	N	N	N	Y	Y	N	N
NM_001308285.1	14198	N	N	N	N	N	Y	N	N
NM_001308286.1	14198	N	N	N	N	Y	Y	N	N
NM_010210.3	14198	N	N	N	N	N	Y	N	N
NM_001285458.1	14260	N	N	N	N	Y	Y	N	N
NM_001285459.1	14260	N	N	N	N	Y	Y	N	N
NM_010230.2	14260	N	N	N	N	Y	Y	N	N
NM_001330291.1	14261	N	N	N	N	Y	Y	N	N
NM_010231.3	14261	N	N	N	N	Y	Y	N	N
NM_008032.3	14266	N	N	N	N	Y	Y	N	N
NM_001081011.2	14270	N	N	N	N	Y	Y	N	N
NM_001162477.1	14389	N	N	N	N	Y	Y	N	N
NM_010248.2	14389	N	N	N	N	Y	Y	N	N
NM_008067.4	14396	N	N	N	N	Y	Y	N	N
NM_010252.4	14405	N	N	N	N	Y	Y	N	N
NM_008074.2	14407	N	N	N	N	Y	Y	N	N
NM_008096.2	14473	N	N	N	N	Y	Y	N	N
NM_010305.1	14677	N	N	N	N	Y	Y	N	N
NM_001160016.1	14688	N	N	N	N	Y	Y	N	N
NM_001160017.1	14688	N	N	N	N	Y	Y	N	N
NM_008142.4	14688	N	N	N	N	Y	Y	N	N
NM_010316.3	14704	N	N	N	N	Y	Y	N	N
NM_001136064.3	14705	N	N	N	N	Y	N	N	N
NM_019497.2	14772	N	N	N	N	Y	Y	N	N
NM_018869.3	14773	N	N	N	N	Y	N	N	N
NM_001039195.1	14800	N	N	N	N	Y	Y	N	N
NM_001083806.1	14800	N	N	N	N	Y	Y	N	N
NM_013540.2	14800	N	N	N	N	Y	Y	N	N
NM_001113180.1	14802	N	N	N	N	Y	Y	N	N
NM_001113181.1	14802	N	N	N	N	Y	Y	N	N
NM_019691.4	14802	N	N	N	N	Y	Y	N	N
NM_008166.2	14803	N	N	N	N	Y	Y	N	N
NM_008167.2	14804	N	N	N	N	Y	Y	N	N
NM_001346964.1	14805	N	N	N	N	Y	Y	N	N
NM_010348.3	14805	N	N	N	N	Y	Y	N	N
NM_146072.4	14805	N	N	N	N	Y	Y	N	N
NM_001111268.1	14806	N	N	N	N	N	Y	N	N
NM_010349.2	14806	N	N	N	N	N	Y	N	N
NM_008168.2	14809	N	N	N	N	N	Y	N	N
NM_001311072.1	14823	N	N	N	N	Y	Y	N	N
NM_008174.2	14823	N	N	N	N	Y	Y	N	N
NM_008182.3	14858	N	N	N	N	N	Y	N	N
NR_051981.1	15016	N	N	N	N	N	N	Y	N
NM_023124.5	15019	N	N	N	N	N	N	N	Y
NM_010399.2	15051	N	N	N	N	N	N	N	Y
NM_031367.1	15061	N	Y	N	N	N	Y	N	N
NM_010400.2	15101	N	Y	N	N	Y	Y	N	N
NM_010403.2	15112	N	N	N	N	Y	Y	N	N
NM_001278161.1	15129	N	N	N	N	N	N	N	Y
NM_001077705.2	15170	N	N	N	N	Y	Y	N	N
NM_013545.3	15170	N	N	N	N	Y	Y	N	N
NM_001159627.1	15203	N	N	N	N	Y	Y	N	N
NM_001159628.1	15203	N	N	N	N	Y	Y	N	N
NM_010417.2	15203	N	N	N	N	Y	Y	N	N
NM_010418.2	15204	N	N	N	N	Y	Y	N	N
NM_001136065.2	15258	N	N	N	N	Y	Y	N	N
NM_001294143.1	15258	N	N	N	N	Y	Y	N	N
NM_001294144.1	15258	N	N	N	N	Y	Y	N	N
NM_010433.2	15258	N	N	N	N	Y	Y	N	N
NM_001146100.1	15275	N	N	N	N	Y	Y	N	N
NM_010438.3	15275	N	N	N	N	Y	Y	N	N
NM_001025427.3	15361	N	N	N	N	N	Y	N	N
NM_001039356.2	15361	N	N	N	N	N	Y	N	N
NM_001166535.1	15361	N	N	N	N	N	Y	N	N
NM_001166536.1	15361	N	N	N	N	N	Y	N	N
NM_001166537.1	15361	N	N	N	N	N	Y	N	N
NM_001166539.1	15361	N	N	N	N	N	Y	N	N
NM_001166540.1	15361	N	N	N	N	N	Y	N	N
NM_001166541.1	15361	N	N	N	N	N	Y	N	N
NM_001166542.1	15361	N	N	N	N	N	Y	N	N
NM_001166543.1	15361	N	N	N	N	N	Y	N	N
NM_001166544.1	15361	N	N	N	N	N	Y	N	N
NM_001166545.1	15361	N	N	N	N	N	Y	N	N
NM_001166546.1	15361	N	N	N	N	N	Y	N	N
NM_016660.3	15361	N	N	N	N	N	Y	N	N
NM_013557.2	15467	N	Y	N	N	N	N	N	N
NM_008312.4	15560	N	N	N	N	Y	Y	N	N
NM_001252266.1	15893	N	N	N	N	Y	Y	N	N
NM_010492.3	15893	N	N	N	N	Y	Y	N	N
NM_134103.2	16180	N	N	N	N	N	Y	N	N
NR_015351.1	16353	N	N	N	Y	N	N	N	N
NM_016780.2	16416	N	N	N	N	Y	Y	N	N
NM_010584.3	16429	N	N	N	N	Y	Y	N	N
NM_010597.4	16497	N	N	N	N	Y	Y	N	N
NM_001038607.2	16510	N	N	N	N	Y	Y	N	N
NM_010600.3	16510	N	N	N	N	Y	Y	N	N
NM_001304810.1	16519	N	N	N	N	Y	N	N	N
NM_008426.2	16519	N	N	N	N	Y	Y	N	N
NM_001253358.1	16531	N	N	N	N	Y	Y	N	N
NM_001253359.1	16531	N	N	N	N	Y	Y	N	N
NM_001253360.1	16531	N	N	N	N	Y	Y	N	N
NM_001253361.1	16531	N	N	N	N	Y	Y	N	N
NM_001253362.1	16531	N	N	N	N	Y	Y	N	N
NM_001253363.1	16531	N	N	N	N	Y	Y	N	N
NM_001253364.1	16531	N	N	N	N	Y	Y	N	N
NM_001253365.1	16531	N	N	N	N	Y	Y	N	N
NM_001253366.1	16531	N	N	N	N	Y	Y	N	N
NM_001253367.1	16531	N	N	N	N	Y	Y	N	N
NM_001253368.1	16531	N	N	N	N	Y	Y	N	N
NM_001253369.1	16531	N	N	N	N	Y	Y	N	N
NM_001253370.1	16531	N	N	N	N	Y	Y	N	N
NM_001253371.1	16531	N	N	N	N	Y	Y	N	N
NM_001253372.1	16531	N	N	N	N	Y	Y	N	N
NM_001253373.1	16531	N	N	N	N	Y	Y	N	N
NM_001253374.1	16531	N	N	N	N	Y	Y	N	N
NM_001253375.1	16531	N	N	N	N	Y	Y	N	N
NM_001253376.1	16531	N	N	N	N	Y	Y	N	N
NM_001253377.1	16531	N	N	N	N	Y	Y	N	N
NM_001253378.1	16531	N	N	N	N	Y	Y	N	N
NM_010610.3	16531	N	N	N	N	Y	Y	N	N
NM_008434.2	16535	N	N	N	N	Y	Y	N	N
NM_010615.1	16551	N	N	N	N	Y	N	N	N
NM_001081133.2	16558	N	N	N	N	Y	Y	N	N
NM_001355123.1	16558	N	N	N	N	Y	Y	N	N
NM_001110315.2	16560	N	N	N	N	Y	Y	N	N
NM_001294149.1	16560	N	N	N	N	Y	Y	N	N
NM_001294150.1	16560	N	N	N	N	Y	Y	N	N
NM_008440.4	16560	N	N	N	N	Y	Y	N	N
NM_001305643.1	16579	N	N	N	N	N	Y	N	N
NM_010629.3	16579	N	N	N	N	N	Y	N	N
NM_001170851.1	16633	N	N	N	N	Y	Y	N	N
NM_008462.5	16633	N	N	N	N	Y	Y	N	N
NM_001289604.1	16634	N	N	N	N	Y	Y	N	N
NM_001289605.1	16634	N	N	N	N	Y	Y	N	N
NM_010648.3	16634	N	N	N	N	Y	Y	N	N
NM_001252577.1	16635	N	N	N	N	Y	Y	N	N
NM_010649.3	16635	N	N	N	N	Y	Y	N	N
NM_001110323.1	16638	N	N	N	N	N	Y	N	N
NM_014194.5	16638	N	N	N	N	Y	Y	N	N
NM_001101620.1	16639	N	N	N	N	N	Y	N	N
NM_010650.3	16639	N	N	N	N	N	Y	N	N
NM_010651.3	16640	N	N	N	N	Y	Y	N	N
NM_008481.2	16773	N	N	N	N	Y	Y	N	N
NM_001317391.1	16795	N	N	N	N	Y	Y	N	N
NM_010687.2	16795	N	N	N	N	Y	Y	N	N
NM_001113408.1	16825	N	N	N	N	Y	N	N	N
NM_001122899.1	16847	N	N	N	N	Y	Y	N	N
NM_010704.2	16847	N	N	N	N	Y	Y	N	N
NM_146146.2	16847	N	N	N	N	Y	Y	N	N
NM_001313897.1	16993	N	N	N	N	Y	Y	N	N
NM_008517.2	16993	N	N	N	N	Y	Y	N	N
NM_001111096.1	17096	N	N	N	N	Y	Y	N	N
NM_010747.2	17096	N	N	N	N	Y	Y	N	N
NM_010748.2	17101	N	N	N	N	Y	Y	N	N
NM_001164041.1	17129	N	N	N	N	Y	N	N	N
NM_001145802.1	17152	N	N	N	N	Y	Y	N	N
NM_001145803.1	17152	N	N	N	N	Y	Y	N	N
NM_008547.2	17152	N	N	N	N	Y	Y	N	N
NM_001252563.1	17183	N	N	N	N	Y	Y	N	N
NM_013592.4	17183	N	N	N	N	Y	Y	N	N
NM_010778.4	17221	N	N	N	N	Y	N	N	N
NR_132621.1	17221	N	N	N	N	Y	N	N	N
NM_001161413.1	17254	N	N	N	N	Y	Y	N	N
NM_008584.3	17286	N	N	N	N	Y	Y	N	N
NM_001290504.1	17318	N	N	N	N	N	Y	N	N
NM_001290505.1	17318	N	N	N	N	N	Y	N	N
NM_001290506.1	17318	N	N	N	N	N	Y	N	N
NM_001290512.1	17318	N	N	N	N	N	Y	N	N
NM_010797.3	17318	N	N	N	N	N	Y	N	N
NM_010806.1	17356	N	N	N	N	Y	Y	N	N
NM_019724.4	17389	N	N	N	N	Y	Y	N	N
NR_135158.1	17389	N	N	N	N	Y	N	N	N
NM_010816.1	17450	N	N	N	N	Y	Y	N	N
NM_001305284.1	17475	N	N	N	N	Y	N	N	N
NM_001305286.1	17475	N	N	N	N	Y	N	N	N
NM_010820.3	17475	N	N	N	N	Y	N	N	N
NM_008625.2	17533	N	N	N	N	Y	Y	N	N
NM_001039934.1	17756	N	N	N	N	Y	N	N	N
NM_008632.2	17756	N	N	N	N	Y	N	N	N
NM_001164190.1	17772	N	N	N	N	Y	Y	N	N
NM_001164191.1	17772	N	N	N	N	Y	Y	N	N
NM_001164192.1	17772	N	N	N	N	Y	Y	N	N
NM_019926.3	17772	N	N	N	N	Y	Y	N	N
NM_023566.3	17831	Y	Y	N	N	N	N	N	N
NR_027619.1	17835	N	N	N	N	Y	N	N	N
NM_010846.1	17857	N	Y	N	N	N	Y	N	N
NM_001099635.1	17883	N	N	N	N	Y	Y	N	N
NM_010870.2	17951	N	N	N	N	Y	Y	N	N
NM_010871.2	17952	N	N	N	N	Y	Y	N	N
NM_008677.2	17972	N	N	N	N	Y	Y	N	N
NM_001293637.1	18004	N	N	N	N	Y	Y	N	N
NM_001293638.1	18004	N	N	N	N	Y	Y	N	N
NM_001293639.1	18004	N	N	N	N	Y	Y	N	N
NM_175089.4	18004	N	N	N	N	Y	Y	N	N
NM_010917.2	18073	N	N	N	N	Y	Y	N	N
NM_001290370.1	18108	N	N	N	N	N	Y	N	N
NM_008708.2	18108	N	N	N	N	N	Y	N	N
NM_008710.3	18115	N	Y	N	N	N	Y	N	N
NM_008729.2	18163	N	N	N	N	Y	Y	N	N
NM_001190187.1	18183	N	N	N	N	Y	Y	N	N
NM_001190188.1	18183	N	N	N	N	Y	Y	N	N
NM_008734.3	18183	N	N	N	N	Y	Y	N	N
NM_001198587.3	18191	N	N	N	N	Y	Y	N	N
NM_001252074.2	18191	N	N	N	N	Y	Y	N	N
NM_172544.3	18191	N	N	N	N	Y	Y	N	N
NM_010941.3	18194	N	N	N	N	Y	Y	N	N
NM_001025074.2	18212	N	N	N	N	Y	Y	N	N
NM_001282961.1	18212	N	N	N	N	Y	Y	N	N
NM_008746.5	18213	N	N	N	N	Y	Y	N	N
NM_182809.2	18213	N	N	N	N	Y	Y	N	N
NM_146563.1	18315	N	N	N	N	N	Y	N	N
NM_021879.2	18431	N	N	N	N	Y	Y	N	N
NM_008779.2	18488	N	N	N	N	Y	Y	N	N
NM_001347228.1	18537	N	N	N	N	Y	N	N	N
NM_008786.2	18537	N	N	N	N	Y	N	N	N
NM_008792.4	18549	N	N	N	N	Y	Y	N	N
NM_001164677.1	18571	N	N	N	N	Y	Y	N	N
NM_001164678.1	18571	N	N	N	N	Y	Y	N	N
NM_011052.2	18571	N	N	N	N	Y	Y	N	N
NM_001159582.1	18573	N	N	N	N	Y	Y	N	N
NM_001355140.1	18573	N	N	N	N	Y	Y	N	N
NM_001355142.1	18573	N	N	N	N	Y	Y	N	N
NM_001355143.1	18573	N	N	N	N	Y	Y	N	N
NM_016744.4	18573	N	N	N	N	Y	Y	N	N
NM_001025568.2	18575	N	N	N	N	Y	Y	N	N
NM_001159952.1	18575	N	N	N	N	Y	N	N	N
NM_001159953.1	18575	N	N	N	N	Y	Y	N	N
NM_001159955.1	18575	N	N	N	N	N	Y	N	N
NM_001159960.1	18575	N	N	N	N	Y	Y	N	N
NM_011054.4	18575	N	N	N	N	Y	Y	N	N
NM_008824.3	18639	N	N	N	N	Y	Y	N	N
NM_011076.2	18671	N	N	N	N	Y	Y	N	N
NM_011077.2	18675	N	N	N	N	Y	Y	N	N
NM_207683.2	18705	Y	Y	N	N	Y	Y	N	N
NM_011087.1	18722	N	N	N	N	N	N	N	Y
NM_011088.1	18724	N	N	N	N	N	Y	N	Y
NM_011090.2	18726	N	N	N	N	N	Y	N	N
NM_011091.1	18727	N	N	N	Y	N	N	N	Y
NM_001289428.1	18729	N	Y	N	N	Y	Y	N	N
NM_008848.1	18729	N	Y	N	N	N	Y	N	N
NM_011093.1	18729	N	Y	N	N	N	Y	N	N
NM_011094.1	18730	N	N	N	Y	N	Y	N	Y
NM_001316672.1	18751	N	N	N	N	Y	Y	N	N
NM_008855.2	18751	N	N	N	N	Y	Y	N	N
NM_008858.3	18760	N	N	N	N	Y	Y	N	N
NM_001355153.1	18798	N	N	N	N	Y	Y	N	N
NM_001355154.1	18798	N	N	N	N	Y	Y	N	N
NM_001355156.1	18798	N	N	N	N	Y	Y	N	N
NM_013829.2	18798	N	N	N	N	Y	Y	N	N
NM_001164056.1	18805	N	N	N	N	Y	Y	N	N
NM_008875.4	18805	N	N	N	N	Y	Y	N	N
NM_008892.2	18968	N	N	N	N	Y	N	N	N
NM_001163415.1	19054	N	Y	N	N	N	N	N	N
NM_011154.2	19054	N	Y	N	N	N	N	N	N
NM_011157.2	19073	N	N	N	N	N	Y	N	N
NM_008922.2	19076	N	N	N	N	Y	Y	N	N
NM_011158.3	19088	N	N	N	N	Y	Y	N	N
NM_001013833.3	19091	N	N	N	N	Y	Y	N	N
NM_011160.3	19091	N	N	N	N	Y	Y	N	N
NM_001278256.1	19122	N	N	N	N	Y	N	N	N
NM_008941.3	19146	N	N	N	N	Y	Y	N	N
NM_178855.4	19146	N	N	N	N	Y	Y	N	N
NM_011184.5	19167	N	N	N	N	N	Y	N	N
NM_011204.2	19249	N	N	N	N	Y	Y	N	N
NM_011211.3	19266	N	N	N	N	Y	N	N	N
NM_008983.2	19272	N	N	N	N	Y	Y	N	N
NM_011215.2	19276	N	N	N	N	Y	Y	N	N
NM_011217.2	19279	N	N	N	N	Y	N	N	N
NM_001291149.1	19281	N	N	N	N	Y	Y	N	N
NM_001291150.1	19281	N	N	N	N	Y	Y	N	N
NM_001291151.1	19281	N	N	N	N	Y	Y	N	N
NM_021464.5	19281	N	N	N	N	Y	Y	N	N
NM_009014.3	19363	N	N	N	N	Y	Y	N	N
NM_009016.1	19368	N	N	N	N	N	N	N	Y
NM_009017.1	19369	N	N	N	N	N	N	N	Y
NM_009027.3	19418	Y	Y	N	N	Y	Y	N	N
NM_001310464.1	19699	N	N	N	N	Y	Y	N	N
NM_011261.2	19699	N	N	N	N	Y	Y	N	N
NM_009065.2	19762	N	N	N	N	Y	Y	N	N
NR_024198.2	19785	N	N	Y	N	N	N	Y	N
NM_011282.2	19886	N	N	N	N	Y	Y	N	N
NM_009099.2	20128	N	N	N	N	Y	Y	N	N
NM_009109.2	20190	N	N	N	N	Y	Y	N	N
NM_001313997.1	20265	N	N	N	N	Y	Y	N	N
NM_018733.2	20265	N	N	N	N	Y	Y	N	N
NM_009135.2	20272	N	N	N	N	N	Y	N	N
NM_001293673.1	20320	N	N	N	N	Y	Y	N	N
NM_009145.2	20320	N	N	N	N	Y	Y	N	N
NM_009148.3	20336	N	N	N	N	Y	Y	N	N
NM_009149.2	20340	N	N	N	N	Y	Y	N	N
NM_013657.5	20348	N	N	N	N	Y	N	N	N
NM_011348.2	20349	N	N	N	N	Y	Y	N	N
NM_013661.2	20357	N	N	N	N	Y	Y	N	N
NM_011743.3	20402	N	N	N	N	Y	N	N	N
NM_001277954.1	20408	N	N	N	N	Y	Y	N	N
NM_001277955.1	20408	N	N	N	N	Y	N	N	N
NM_017400.7	20408	N	N	N	N	Y	Y	N	N
NM_009200.3	20513	N	N	N	N	Y	Y	N	N
NM_009205.2	20532	N	N	N	N	Y	Y	N	N
NM_001291227.2	20563	N	N	N	N	Y	Y	N	N
NM_001291228.2	20563	N	N	N	N	Y	Y	N	N
NM_178804.5	20563	N	N	N	N	Y	Y	N	N
NR_111900.2	20563	N	N	N	N	Y	N	N	N
NM_016667.3	20649	N	N	N	N	Y	Y	N	N
NM_001135559.1	20663	N	N	N	N	Y	N	N	N
NM_001025559.3	20679	N	N	N	N	Y	Y	N	N
NM_001025560.2	20679	N	N	N	N	Y	Y	N	N
NM_001277326.1	20679	N	N	N	N	N	Y	N	N
NM_001277327.1	20679	N	N	N	N	Y	Y	N	N
NM_001277328.1	20679	N	N	N	N	Y	Y	N	N
NM_011445.4	20679	N	N	N	N	N	Y	N	N
NM_001313712.1	20684	N	N	N	N	Y	Y	N	N
NM_001313713.1	20684	N	N	N	N	Y	Y	N	N
NM_001313714.1	20684	N	N	N	N	Y	Y	N	N
NM_013673.4	20684	N	N	N	N	Y	Y	N	N
NM_009246.3	20703	N	N	N	N	N	Y	N	N
NM_011474.3	20762	N	N	N	N	N	Y	N	N
NM_009268.1	20771	N	N	N	N	N	Y	N	N
NM_001111296.2	20859	N	N	N	N	Y	Y	N	N
NM_009293.1	20905	N	N	Y	N	N	N	Y	N
NM_001326558.1	20917	N	N	N	N	Y	N	N	N
NM_011507.3	20917	N	N	N	N	N	Y	N	N
NM_011516.2	20957	N	N	N	N	Y	Y	N	N
NM_021382.6	21338	N	N	N	N	Y	Y	N	N
NM_020614.2	21340	N	N	N	N	N	Y	N	N
NM_001253862.1	21406	N	N	N	N	Y	Y	N	N
NM_001253865.1	21406	N	N	N	N	Y	N	N	N
NM_011544.3	21406	N	N	N	N	Y	Y	N	N
NM_011546.3	21417	N	N	N	N	Y	Y	N	N
NM_011553.4	21461	N	N	N	N	N	Y	N	N
NM_001290549.1	21687	N	N	N	N	Y	Y	N	N
NM_001290551.1	21687	N	N	N	N	Y	Y	N	N
NM_013690.3	21687	N	N	N	N	Y	Y	N	N
NM_148926.2	21769	N	N	N	N	Y	Y	N	N
NM_011596.5	21871	Y	Y	N	N	Y	Y	N	N
NM_009390.2	21892	N	N	N	N	Y	Y	N	N
NM_019634.2	21912	N	N	N	N	N	Y	N	N
NM_009399.3	21934	N	N	N	N	Y	Y	N	N
NM_011625.1	21981	N	N	N	N	Y	Y	N	N
NM_009417.3	22018	N	N	N	N	Y	Y	N	N
NM_001347342.1	22026	N	N	N	N	Y	N	N	N
NM_011630.3	22026	N	N	N	N	Y	N	N	N
NM_011633.2	22033	Y	Y	N	N	N	N	N	N
NM_001282086.1	22068	N	N	N	N	Y	Y	N	N
NM_001282087.1	22068	N	N	N	N	Y	N	N	N
NM_013838.2	22068	N	N	N	N	Y	Y	N	N
NM_001113404.1	22095	N	N	N	N	Y	Y	N	N
NM_011648.5	22095	N	N	N	N	Y	Y	N	N
NM_009444.1	22135	N	N	N	N	N	N	N	Y
NM_011652.3	22138	N	N	N	N	Y	N	N	N
NM_028004.2	22138	N	N	N	N	Y	N	N	N
NM_001033962.1	22215	N	N	N	N	Y	Y	N	N
NM_011668.2	22215	N	N	N	N	Y	Y	N	N
NM_011674.4	22239	N	N	N	N	Y	Y	N	N
NM_001293561.1	22253	N	N	N	N	Y	Y	N	N
NM_009472.4	22253	N	N	N	N	Y	Y	N	N
NM_021408.3	22283	N	N	N	N	Y	N	N	N
NM_011682.4	22288	N	N	N	N	Y	N	N	N
NM_009485.1	22300	N	N	N	Y	N	N	N	N
NM_009489.2	22305	N	N	N	N	N	Y	N	N
NM_009490.3	22306	N	N	N	N	Y	Y	N	N
NM_001105063.1	22311	N	N	N	N	N	N	N	Y
NM_009506.2	22341	N	N	N	N	Y	Y	N	N
NM_011723.3	22436	N	N	N	N	Y	Y	N	N
NM_001110784.1	22445	N	N	N	N	N	Y	N	N
NM_009529.3	22526	N	N	N	N	Y	Y	N	N
NM_011731.3	22599	N	N	N	N	N	Y	N	N
NM_144515.2	22710	N	N	N	N	Y	N	N	N
NM_011766.5	22762	N	N	N	N	Y	Y	N	N
NM_011800.4	23836	N	N	N	N	Y	Y	N	N
NM_001085376.2	23850	N	N	N	N	Y	Y	N	N
NM_001243046.1	23859	N	N	N	N	Y	Y	N	N
NM_001243047.1	23859	N	N	N	N	Y	Y	N	N
NM_011807.3	23859	N	N	N	N	Y	Y	N	N
NM_001079844.2	23888	N	N	N	N	Y	Y	N	N
NM_011821.3	23888	N	N	N	N	Y	Y	N	N
NM_001290648.1	23919	N	N	N	N	Y	Y	N	N
NM_011831.2	23919	N	N	N	N	Y	Y	N	N
NM_011855.4	23963	N	N	N	N	Y	Y	N	N
NM_001310760.1	23966	N	N	N	N	Y	N	N	N
NM_001310762.1	23966	N	N	N	N	Y	N	N	N
NM_001290707.1	23984	N	N	N	N	Y	N	N	N
NM_011891.4	24052	N	N	N	N	Y	Y	N	N
NM_011920.3	26357	N	N	N	N	Y	N	N	N
NM_008580.4	26408	N	N	N	N	Y	Y	N	N
NM_001081567.2	26414	N	N	N	N	Y	Y	N	N
NM_001310683.1	26414	N	N	N	N	Y	Y	N	N
NM_001310685.1	26414	N	N	N	N	Y	Y	N	N
NM_001310686.2	26414	N	N	N	N	Y	Y	N	N
NM_001318102.1	26414	N	N	N	N	Y	Y	N	N
NM_001318131.1	26414	N	N	N	N	Y	Y	N	N
NM_009158.3	26414	N	N	N	N	Y	Y	N	N
NM_011954.2	26421	N	N	N	Y	N	N	N	Y
NM_030595.1	26422	N	N	N	N	Y	Y	N	N
NM_011959.2	26429	N	N	N	N	Y	N	N	N
NM_001310628.1	26436	N	N	N	N	Y	Y	N	N
NM_001110796.2	26875	N	N	N	N	Y	Y	N	N
NM_011995.4	26875	N	N	N	N	Y	Y	N	N
NM_001170332.1	26888	N	N	N	N	Y	Y	N	N
NM_001170333.1	26888	N	N	N	N	Y	Y	N	N
NM_011999.4	26888	N	N	N	N	Y	Y	N	N
NM_012054.4	27052	N	N	N	N	Y	Y	N	N
NM_001293676.1	27083	N	N	N	N	N	Y	N	N
NM_001293677.1	27083	N	N	N	N	N	Y	N	N
NM_001293678.1	27083	N	N	N	N	N	Y	N	N
NM_001293679.1	27083	N	N	N	N	N	Y	N	N
NM_001293680.1	27083	N	N	N	N	N	Y	N	N
NM_021365.3	27083	N	N	N	N	N	Y	N	N
NM_013784.3	27392	N	N	N	N	Y	Y	N	N
NM_030683.3	27411	N	N	N	N	Y	N	N	N
NM_207651.3	27411	N	N	N	N	Y	N	N	N
NM_013794.4	27424	N	N	N	N	N	Y	N	N
NM_023718.3	28254	N	N	N	N	Y	Y	N	N
NM_001311111.1	29807	N	N	N	N	N	Y	N	N
NM_013861.4	29807	N	N	N	N	N	Y	N	N
NM_013862.5	29809	N	N	N	N	Y	Y	N	N
NM_016718.2	29862	N	N	N	N	N	Y	N	N
NM_013877.3	29865	N	N	N	N	Y	N	N	N
NM_013881.4	29869	N	N	N	N	Y	Y	N	N
NM_024450.2	30049	N	N	N	N	N	Y	N	N
NM_013927.2	30952	N	N	N	N	Y	Y	N	N
NM_001113420.1	30953	N	N	N	N	N	Y	N	N
NM_001113421.1	30953	N	N	N	N	Y	Y	N	N
NM_001282044.1	30953	N	N	N	N	Y	Y	N	N
NM_001282045.1	30953	N	N	N	N	Y	Y	N	N
NM_001146200.1	30955	N	N	N	N	N	Y	N	N
NM_001146201.1	30955	N	N	N	N	N	Y	N	N
NM_020272.2	30955	N	N	N	N	N	Y	N	N
NM_013935.3	30963	N	N	N	N	N	Y	N	N
NM_001285833.1	50490	N	N	N	N	Y	Y	N	N
NM_001285835.1	50490	N	N	N	N	Y	Y	N	N
NM_015760.5	50490	N	N	N	N	Y	Y	N	N
NM_015769.2	50505	N	N	N	N	Y	Y	N	N
NM_015773.2	50525	N	N	N	N	Y	Y	N	N
NM_001311159.1	50757	N	N	N	N	N	Y	N	N
NM_015793.2	50757	N	N	N	N	N	Y	N	N
NM_015794.1	50758	N	N	N	N	Y	Y	N	N
NM_015803.2	50769	N	N	N	N	Y	Y	N	N
NM_001282061.2	50779	N	N	N	N	N	Y	N	N
NM_001310478.2	50779	N	N	N	N	Y	Y	N	N
NM_015812.4	50779	N	N	N	N	Y	Y	N	N
NM_001170745.1	50791	N	N	N	N	Y	Y	N	N
NM_001170746.1	50791	N	N	N	N	Y	Y	N	N
NM_015823.3	50791	N	N	N	N	Y	Y	N	N
NM_001347334.1	50817	N	N	N	N	N	Y	N	N
NM_001317726.1	50873	N	N	N	N	Y	Y	N	N
NM_016694.4	50873	N	N	N	N	Y	Y	N	N
NM_024204.6	52024	N	N	N	N	Y	N	N	N
NR_146211.1	52480	N	N	N	N	Y	N	N	N
NM_134046.5	52504	N	N	N	N	Y	Y	N	N
NM_029148.1	52837	N	N	N	N	Y	Y	N	N
NM_001113474.1	52855	N	N	N	N	N	Y	N	N
NM_001302675.1	52855	N	N	N	N	N	Y	N	N
NM_001302676.1	52855	N	N	N	N	N	Y	N	N
NM_001302677.1	52855	N	N	N	N	N	Y	N	N
NM_001302681.1	52855	N	N	N	N	N	Y	N	N
NM_001302682.1	52855	N	N	N	N	N	Y	N	N
NM_001302683.1	52855	N	N	N	N	N	Y	N	N
NM_178611.6	52855	N	N	N	N	N	Y	N	N
NM_016909.2	53424	N	N	N	N	Y	Y	N	N
NM_001185153.1	53604	N	N	N	N	Y	Y	N	N
NM_015785.2	53604	N	N	N	N	Y	Y	N	N
NM_001252614.1	53618	N	N	N	N	Y	Y	N	N
NM_001252615.1	53618	N	N	N	N	N	Y	N	N
NM_016893.5	53618	N	N	N	N	Y	Y	N	N
NR_045554.1	53618	N	N	N	N	Y	N	N	N
NM_016879.2	53622	N	Y	N	N	N	N	N	N
NM_001281929.1	53623	N	N	N	N	Y	Y	N	N
NM_001290451.1	53623	N	N	N	N	Y	Y	N	N
NM_016886.4	53623	N	N	N	N	Y	Y	N	N
NR_104053.1	53623	N	N	N	N	Y	N	N	N
NM_017385.1	53873	N	N	N	Y	N	N	N	Y
NM_001017422.1	53877	N	N	N	N	N	N	N	Y
NM_017390.4	53878	N	N	N	N	N	Y	N	N
NM_021545.1	53880	N	N	N	N	N	Y	N	Y
NM_001286653.1	53901	N	N	N	N	N	Y	N	N
NM_207649.1	53901	N	N	N	N	N	Y	N	N
NM_001289653.1	54003	N	N	N	N	Y	Y	N	N
NM_172493.2	54004	N	N	N	N	Y	Y	N	N
NM_001276321.1	54151	N	N	N	N	N	Y	N	N
NM_019396.3	54151	N	N	N	N	N	Y	N	N
NM_017478.3	54160	Y	Y	N	N	N	N	N	N
NM_018755.2	54381	N	N	N	N	Y	Y	N	N
NM_176073.4	54381	N	N	N	N	Y	Y	N	N
NM_001136260.1	54403	N	N	N	N	Y	Y	N	N
NM_001197147.1	54403	N	N	N	N	Y	Y	N	N
NM_018760.2	54403	N	N	N	N	Y	Y	N	N
NM_018830.1	54447	N	N	N	N	Y	Y	N	N
NM_019457.2	54562	N	N	N	N	Y	Y	N	N
NM_018779.1	54611	N	N	N	N	Y	Y	N	N
NM_019971.2	54635	N	N	N	N	Y	Y	N	N
NM_001168568.1	55936	N	N	N	N	Y	Y	N	N
NM_001168569.1	55936	N	N	N	N	Y	Y	N	N
NM_001168571.1	55936	N	N	N	N	Y	Y	N	N
NM_018737.5	55936	N	N	N	N	Y	Y	N	N
NR_033143.1	55936	N	N	N	N	Y	N	N	N
NM_019496.3	56068	N	N	N	N	Y	Y	N	N
NM_019514.3	56079	N	N	N	N	Y	Y	N	N
NM_207109.2	56079	N	N	N	N	Y	Y	N	N
NM_019515.1	56183	N	N	N	N	Y	Y	N	N
NM_019635.2	56274	N	N	N	N	Y	Y	N	N
NM_019667.2	56324	N	N	N	N	Y	Y	N	N
NM_001291071.1	56421	N	N	N	N	Y	Y	N	N
NM_019703.4	56421	N	N	N	N	Y	Y	N	N
NM_001347335.1	56462	N	N	N	N	Y	Y	N	N
NM_019880.3	56462	N	N	N	N	Y	Y	N	N
NM_019776.2	56463	N	N	N	N	Y	Y	N	N
NM_001190320.1	56620	N	N	N	N	Y	Y	N	N
NM_001190321.1	56620	N	N	N	N	Y	Y	N	N
NM_020001.2	56620	N	N	N	N	Y	Y	N	N
NM_001347232.1	56637	N	N	N	N	N	Y	N	N
NM_019827.6	56637	N	N	N	N	N	Y	N	N
NM_001003719.2	56784	N	N	N	N	Y	N	N	N
NM_001112714.2	56784	N	N	N	N	Y	N	N	N
NM_001286263.1	56784	N	N	N	N	Y	N	N	N
NM_019994.5	56784	N	N	N	N	Y	N	N	N
NM_020261.4	56868	N	N	N	N	N	Y	N	N
NM_020505.2	57257	N	N	N	N	Y	Y	N	N
NM_146139.2	57257	N	N	N	N	N	Y	N	N
NM_020587.2	57317	N	N	N	N	N	Y	N	N
NM_001162540.1	57740	N	N	N	N	Y	Y	N	N
NM_021302.3	57740	N	N	N	N	Y	Y	N	N
NM_001290994.1	57775	N	N	N	N	Y	N	N	N
NM_021323.3	57775	N	N	N	N	Y	N	N	N
NM_001177795.1	58175	N	N	N	N	Y	Y	N	N
NM_001252501.1	58178	N	N	N	N	Y	Y	N	N
NM_001290356.1	58178	N	N	N	N	Y	Y	N	N
NM_021377.3	58178	N	N	N	N	Y	Y	N	N
NM_001167730.1	58186	N	N	N	N	Y	Y	N	N
NM_021385.2	58186	N	N	N	N	Y	Y	N	N
NM_021416.3	58227	N	N	N	N	Y	Y	N	N
NM_001163522.1	59308	N	N	N	N	Y	Y	N	N
NM_016885.2	59308	N	N	N	N	Y	Y	N	N
NM_030688.2	60367	N	N	N	N	Y	Y	N	N
NM_001271843.1	64008	N	N	N	N	Y	Y	N	N
NM_022026.3	64008	N	N	N	N	Y	Y	N	N
NR_073483.1	64008	N	N	N	N	Y	N	N	N
NM_001079686.1	64009	N	N	N	N	Y	Y	N	N
NM_001347711.1	64009	N	N	N	N	Y	Y	N	N
NM_001347732.1	64009	N	N	N	N	Y	Y	N	N
NM_023906.3	65257	N	N	N	N	Y	Y	N	N
NM_023052.2	65956	N	N	N	N	N	N	N	Y
NM_001177849.1	65973	N	N	N	N	Y	Y	N	N
NM_001177850.1	65973	N	N	N	N	Y	Y	N	N
NM_001177851.1	65973	N	N	N	N	Y	Y	N	N
NM_001177852.1	65973	N	N	N	N	Y	Y	N	N
NM_001177853.1	65973	N	N	N	N	Y	Y	N	N
NM_001177854.1	65973	N	N	N	N	Y	Y	N	N
NM_001290367.1	65973	N	N	N	N	Y	Y	N	N
NM_023066.3	65973	N	N	N	N	Y	Y	N	N
NM_023154.3	66071	N	N	N	N	Y	N	N	N
NM_001167736.1	66098	N	N	N	N	Y	Y	N	N
NM_025351.3	66098	N	N	N	N	Y	Y	N	N
NM_025402.2	66179	N	N	N	N	Y	Y	N	N
NM_025434.3	66230	N	N	N	N	Y	Y	N	N
NM_001309809.2	66272	N	N	N	N	N	Y	N	N
NM_001309810.2	66272	N	N	N	N	N	Y	N	N
NM_001163536.1	66326	N	N	N	N	Y	Y	N	N
NM_001163537.1	66326	N	N	N	N	Y	Y	N	N
NM_025489.3	66326	N	N	N	N	Y	Y	N	N
NM_025599.3	66497	N	N	N	N	N	Y	N	N
NM_026844.3	66531	N	N	N	N	N	Y	N	N
NM_028260.2	66541	N	N	N	N	Y	Y	N	N
NM_019800.4	66659	N	N	N	N	N	Y	N	N
NM_025696.3	66673	N	N	N	N	Y	Y	N	N
NM_025700.2	66681	N	N	N	N	Y	Y	N	N
NM_001271533.1	66722	N	N	N	N	Y	Y	N	N
NM_029160.3	66722	N	N	N	N	Y	Y	N	N
NM_025736.2	66736	N	N	N	N	Y	Y	N	N
NM_001004357.2	66797	N	N	N	N	Y	Y	N	N
NM_001256489.1	66808	N	N	N	N	Y	Y	N	N
NM_025789.5	66832	N	N	N	N	Y	Y	N	N
NM_001039965.1	66869	N	N	N	N	N	Y	N	N
NM_001039967.1	66869	N	N	N	N	N	Y	N	N
NM_181274.3	66869	N	N	N	N	N	Y	N	N
NM_025819.4	66875	N	N	N	N	Y	Y	N	N
NM_025822.3	66880	N	N	N	N	Y	Y	N	N
NM_001168591.1	66887	N	N	N	N	Y	Y	N	N
NM_025827.3	66887	N	N	N	N	Y	Y	N	N
NM_001277273.1	67030	N	N	N	N	Y	Y	N	N
NM_025923.3	67030	N	N	N	N	Y	Y	N	N
NR_102382.1	67030	N	N	N	N	Y	N	N	N
NM_025949.3	67071	N	N	N	N	Y	N	N	N
NM_001163024.1	67074	N	N	N	N	Y	N	N	N
NM_001163025.1	67074	N	N	N	N	Y	N	N	N
NM_153395.2	67074	N	N	N	N	Y	N	N	N
NM_144953.2	67080	N	N	N	N	Y	N	N	N
NM_025985.4	67128	N	N	N	N	Y	Y	N	N
NM_025992.2	67138	N	N	N	N	Y	Y	N	N
NM_026067.3	67276	N	N	N	N	N	Y	N	N
NM_001122960.1	67282	N	N	N	N	N	Y	N	N
NM_026070.3	67282	N	N	N	N	N	Y	N	N
NM_027487.1	67282	N	N	N	N	N	Y	N	N
NM_026072.1	67285	N	N	N	N	Y	Y	N	N
NM_026162.6	67448	N	N	N	N	Y	Y	N	N
NM_026184.2	67475	N	N	N	N	Y	Y	N	N
NM_026189.3	67484	N	N	N	N	Y	Y	N	N
NM_001025615.3	67501	N	N	N	N	Y	Y	N	N
NM_001289436.1	67501	N	N	N	N	Y	N	N	N
NM_026202.4	67501	N	N	N	N	Y	Y	N	N
NM_026220.4	67532	N	N	N	N	N	Y	N	N
NM_001205098.1	67569	N	N	N	N	Y	N	N	N
NM_026254.2	67581	N	N	N	N	Y	Y	N	N
NM_026327.3	67708	N	N	N	N	Y	Y	N	N
NM_026331.3	67712	N	N	N	N	Y	Y	N	N
NM_001290623.1	67753	N	N	N	N	Y	Y	N	N
NM_027089.4	67753	N	N	N	N	Y	Y	N	N
NM_026367.4	67769	N	N	N	N	N	Y	N	N
NM_001199151.1	67847	N	N	N	N	Y	Y	N	N
NM_001199153.1	67847	N	N	N	N	Y	Y	N	N
NM_001199154.1	67847	N	N	N	N	Y	Y	N	N
NM_026408.4	67847	N	N	N	N	Y	Y	N	N
NM_001190795.1	67848	N	N	N	N	N	Y	N	N
NM_026409.4	67848	N	N	N	N	N	Y	N	N
NR_120500.1	67854	N	N	N	N	Y	N	N	N
NM_001285452.1	67878	N	N	N	N	Y	Y	N	N
NM_028975.4	67878	N	N	N	N	Y	Y	N	N
NM_030108.2	67878	N	N	N	N	Y	Y	N	N
NM_026430.3	67883	N	N	N	N	Y	Y	N	N
NM_026442.3	67899	N	N	N	N	Y	Y	N	N
NM_026458.4	67928	N	N	N	N	Y	Y	N	N
NM_026484.3	67974	N	N	N	N	Y	Y	N	N
NM_023873.3	68121	N	N	N	N	N	Y	N	N
NM_026604.4	68187	N	N	N	N	Y	N	N	N
NR_027970.1	68314	N	N	N	N	Y	N	N	N
NM_001310483.1	68421	N	N	N	N	Y	Y	N	N
NM_026719.2	68421	N	N	N	N	Y	Y	N	N
NM_172400.3	68598	N	N	N	N	N	Y	N	N
NM_001163419.1	68675	N	N	N	N	Y	Y	N	N
NM_001163420.1	68675	N	N	N	N	Y	Y	N	N
NM_138312.1	68675	N	N	N	N	Y	Y	N	N
NR_028109.1	68675	N	N	N	N	Y	N	N	N
NM_001311122.1	68732	N	N	N	N	Y	Y	N	N
NM_026825.3	68732	N	N	N	N	Y	Y	N	N
NM_026835.2	68774	N	N	N	N	Y	Y	N	N
NM_026840.3	68797	N	N	N	N	Y	Y	N	N
NM_001103181.1	68842	N	N	N	N	Y	Y	N	N
NM_054040.3	68842	N	N	N	N	Y	Y	N	N
NR_131896.1	68916	N	N	N	N	Y	N	N	N
NM_026904.2	68999	N	N	N	N	Y	Y	N	N
NM_026939.1	69099	N	N	Y	N	N	N	Y	N
NM_178617.4	69352	N	N	N	N	Y	Y	N	N
NM_054041.2	69538	N	N	N	N	Y	Y	N	N
NM_027150.1	69642	N	N	N	N	Y	N	N	N
NM_001301402.1	69656	N	N	N	N	Y	Y	N	N
NM_027153.3	69656	N	N	N	N	Y	Y	N	N
NR_040309.1	69659	N	N	N	N	Y	N	N	N
NR_015504.1	69732	N	N	N	N	Y	N	N	N
NM_027193.2	69740	N	N	N	N	Y	Y	N	N
NM_027211.2	69787	N	Y	N	N	N	N	N	N
NM_001081074.1	69865	N	N	N	N	Y	Y	N	N
NM_001011707.1	69888	N	N	N	N	N	Y	N	N
NM_001252447.1	69922	N	N	N	N	Y	Y	N	N
NM_027260.3	69922	N	N	N	N	Y	Y	N	N
NR_045497.1	69966	N	N	N	N	Y	N	N	N
NM_001081137.1	69983	N	N	N	N	Y	Y	N	N
NR_040355.1	70005	N	N	N	N	N	N	N	Y
NR_045304.1	70011	N	N	N	N	Y	N	N	N
NM_001190885.1	70357	N	N	N	N	Y	Y	N	N
NM_001190886.1	70357	N	N	N	N	Y	Y	N	N
NM_001290690.1	70357	N	N	N	N	Y	N	N	N
NM_027398.3	70357	N	N	N	N	Y	Y	N	N
NM_152809.2	70425	N	N	N	N	Y	N	N	N
NM_027442.5	70503	N	N	N	N	N	Y	N	N
NM_178395.3	70546	N	N	N	N	Y	N	N	N
NM_001081243.1	70598	N	N	N	N	Y	N	N	N
NM_183087.4	70638	N	N	N	N	Y	Y	N	N
NM_028450.3	70676	N	N	N	N	N	Y	N	N
NM_001312644.1	70846	N	N	N	N	Y	Y	N	N
NM_027583.3	70862	N	N	N	N	Y	Y	N	N
NM_029150.4	70862	N	N	N	N	Y	Y	N	N
NM_027616.3	70950	N	N	N	N	Y	Y	N	N
NM_001316756.1	70951	N	N	N	N	Y	Y	N	N
NM_027617.3	70951	N	N	N	N	Y	Y	N	N
NM_027618.1	70952	N	N	N	N	Y	Y	N	N
NM_001081121.1	70989	N	N	N	N	Y	Y	N	N
NR_045730.1	71058	N	N	N	N	Y	N	N	N
NM_183294.2	71091	N	N	N	N	Y	Y	N	N
NM_001290390.1	71096	N	N	N	N	Y	Y	N	N
NM_001290392.1	71096	N	N	N	N	Y	Y	N	N
NM_001290393.1	71096	N	N	N	N	Y	Y	N	N
NM_027671.5	71096	N	N	N	N	Y	Y	N	N
NM_027700.1	71159	N	Y	N	N	N	N	N	N
NM_001077713.1	71238	N	N	N	N	Y	Y	N	N
NR_045657.1	71264	N	N	N	N	Y	N	N	N
NM_199055.2	71367	N	N	N	N	N	Y	N	N
NM_001081224.2	71373	N	N	N	N	N	Y	N	N
NM_001109684.1	71529	N	Y	N	N	N	N	N	N
NM_144531.3	71529	N	Y	N	N	N	N	N	N
NM_027823.1	71544	N	N	N	N	Y	Y	N	N
NM_133733.4	71566	N	N	N	N	Y	Y	N	N
NM_027830.2	71567	N	N	N	N	Y	Y	N	N
NR_040499.1	71613	N	N	N	N	Y	N	N	N
NM_175173.3	71682	N	N	N	N	Y	N	N	N
NM_001143776.1	71721	N	N	N	N	Y	Y	N	N
NM_001143777.1	71721	N	N	N	N	Y	Y	N	N
NM_024244.4	71721	N	N	N	N	Y	Y	N	N
NM_027886.3	71728	N	N	N	N	Y	Y	N	N
NM_027913.1	71768	N	N	N	N	Y	Y	N	N
NM_027943.1	71830	N	N	N	N	Y	Y	N	N
NM_001164235.1	71831	N	N	N	N	Y	Y	N	N
NM_027944.1	71831	N	N	N	N	Y	Y	N	N
NM_027952.3	71841	N	N	N	N	N	Y	N	N
NM_027964.2	71861	N	N	N	N	Y	Y	N	N
NM_001101433.1	71918	N	N	N	N	Y	Y	N	N
NM_028052.4	72003	N	N	N	N	Y	Y	N	N
NM_001305988.1	72029	N	N	N	N	N	Y	N	N
NM_028065.4	72029	N	N	N	N	N	Y	N	N
NM_001004362.2	72128	N	N	N	N	Y	Y	N	N
NM_028135.2	72160	N	N	N	N	Y	Y	N	N
NM_026998.3	72183	N	N	N	N	Y	Y	N	N
NM_001285991.1	72238	N	N	N	N	Y	Y	N	N
NM_001285993.1	72238	N	N	N	N	Y	Y	N	N
NM_028162.4	72238	N	N	N	N	Y	Y	N	N
NM_001316664.1	72258	N	N	N	N	Y	Y	N	N
NM_001316665.1	72258	N	N	N	N	Y	Y	N	N
NM_001316666.1	72258	N	N	N	N	N	Y	N	N
NM_029911.5	72258	N	N	N	N	Y	Y	N	N
NR_045731.1	72263	N	N	N	N	Y	N	N	N
NR_040494.1	72264	N	N	N	N	Y	N	N	N
NM_001145676.1	72371	N	N	N	N	Y	N	N	N
NM_001305675.1	72404	N	N	N	N	Y	N	N	N
NM_175180.3	72404	N	N	N	N	Y	N	N	N
NM_028231.2	72413	N	N	N	N	Y	Y	N	N
NM_028243.3	72461	N	N	N	N	Y	Y	N	N
NR_045172.1	72511	N	N	N	N	Y	N	N	N
NR_045436.1	72578	N	N	N	N	Y	N	N	N
NM_028295.1	72599	N	N	N	N	Y	Y	N	N
NM_028296.3	72605	N	N	N	N	Y	Y	N	N
NR_036594.1	72677	N	N	N	N	Y	N	N	N
NM_145820.3	72789	N	N	N	N	Y	Y	N	N
NM_001081050.2	72823	N	N	N	N	Y	Y	N	N
NM_028372.1	72852	N	N	N	N	Y	Y	N	N
NM_183094.3	72891	N	N	N	N	Y	Y	N	N
NM_001013802.3	72899	N	N	N	N	Y	Y	N	N
NM_001252620.1	72902	N	N	N	N	Y	Y	N	N
NM_001252621.1	72902	N	N	N	N	Y	Y	N	N
NM_023689.3	72902	N	N	N	N	Y	Y	N	N
NM_001293784.1	72925	N	N	N	N	Y	N	N	N
NM_175188.4	72925	N	N	N	N	Y	Y	N	N
NM_001290552.1	72931	N	N	N	N	N	Y	N	N
NM_001310652.1	73061	N	N	N	N	N	Y	N	N
NM_028434.3	73090	N	N	N	N	Y	Y	N	N
NM_001285852.1	73094	N	N	N	N	Y	Y	N	N
NM_001285859.1	73094	N	N	N	N	Y	Y	N	N
NM_001285860.1	73094	N	N	N	N	Y	Y	N	N
NM_001285862.1	73094	N	N	N	N	Y	Y	N	N
NM_144906.2	73094	N	N	N	N	Y	Y	N	N
NM_001164627.1	73167	N	N	N	N	Y	Y	N	N
NM_001164628.1	73167	N	N	N	N	Y	Y	N	N
NM_001205334.1	73167	N	N	N	N	Y	Y	N	N
NM_028455.4	73167	N	N	N	N	Y	Y	N	N
NM_028483.1	73259	N	N	N	N	Y	Y	N	N
NR_001581.2	73266	N	N	N	N	Y	N	N	N
NM_001167750.1	73288	N	N	N	N	Y	Y	N	N
NM_001167751.1	73288	N	N	N	N	Y	Y	N	N
NM_024260.5	73288	N	N	N	N	Y	Y	N	N
NM_028499.2	73314	N	N	N	N	Y	Y	N	N
NR_108032.1	73408	N	N	N	N	Y	N	N	N
NR_045732.1	73425	N	N	N	N	Y	N	N	N
NR_038059.1	73549	N	N	N	N	Y	N	N	N
NM_028576.2	73582	N	N	N	N	Y	Y	N	N
NR_045936.1	73591	N	N	N	N	Y	N	N	N
NM_028687.1	73936	N	N	N	N	Y	Y	N	N
NR_045960.1	73972	N	N	N	N	Y	N	N	N
NM_028708.2	74004	Y	Y	N	N	N	N	N	N
NM_028709.2	74007	N	N	N	N	Y	Y	N	N
NM_023729.3	74068	N	N	N	N	Y	Y	N	N
NM_028757.2	74103	N	N	N	N	Y	Y	N	N
NM_028759.1	74106	N	N	N	N	Y	Y	N	N
NM_028797.1	74174	N	N	N	N	Y	Y	N	N
NM_028803.4	74185	N	N	N	N	Y	Y	N	N
NR_108051.1	74236	N	N	N	N	N	N	N	Y
NM_001253717.1	74244	N	N	N	N	Y	Y	N	N
NM_001253718.1	74244	N	N	N	N	Y	Y	N	N
NM_028835.4	74244	N	N	N	N	Y	Y	N	N
NR_045965.1	74280	N	N	N	N	Y	N	N	N
NR_033213.2	74305	N	N	N	N	Y	N	N	N
NR_073363.1	74328	N	N	N	N	Y	N	N	N
NM_028887.3	74355	N	N	N	N	Y	Y	N	N
NM_028892.4	74362	N	N	N	N	Y	Y	N	N
NM_001306081.1	74370	N	N	N	N	Y	N	N	N
NM_028898.3	74370	N	N	N	N	Y	Y	N	N
NM_028938.2	74435	N	N	N	N	Y	Y	N	N
NM_001165941.1	74455	N	N	N	N	Y	Y	N	N
NM_001165943.1	74455	N	N	N	N	Y	Y	N	N
NM_028950.4	74455	N	N	N	N	Y	Y	N	N
NM_001029912.2	74464	N	N	N	N	Y	Y	N	N
NM_001290148.1	74478	N	N	N	N	Y	Y	N	N
NM_028964.4	74478	N	N	N	N	Y	Y	N	N
NM_028992.1	74548	N	N	N	N	N	Y	N	N
NM_001278671.1	74589	N	N	N	N	N	Y	N	N
NM_175210.3	74591	N	N	N	N	Y	Y	N	N
NR_040699.1	74624	N	N	N	N	Y	N	N	N
NM_029056.1	74691	N	N	N	N	Y	Y	N	N
NM_029061.3	74703	N	N	N	N	Y	Y	N	N
NM_028848.3	74717	N	N	N	N	N	Y	N	N
NM_029077.4	74735	N	N	N	N	Y	Y	N	N
NM_029105.2	74847	N	N	N	N	Y	Y	N	N
NM_029106.2	74851	N	N	N	N	N	N	N	Y
NR_040737.1	74951	N	N	N	N	Y	N	N	N
NM_029131.3	74954	N	N	N	N	Y	Y	N	N
NR_126087.1	75017	N	N	N	N	Y	N	N	N
NR_040632.1	75069	N	N	N	N	Y	N	N	N
NR_045416.1	75095	N	N	N	N	Y	N	N	N
NR_045440.1	75133	N	N	N	N	Y	N	N	N
NM_181815.3	75216	N	N	N	N	Y	Y	N	N
NM_183111.2	75258	N	N	N	N	Y	Y	N	N
NR_045063.1	75259	N	N	N	N	Y	N	N	N
NM_029238.2	75288	N	N	N	N	Y	Y	N	N
NM_029249.2	75317	N	N	N	N	Y	Y	N	N
NR_040656.1	75360	N	N	N	N	Y	N	N	N
NR_126462.1	75451	N	N	N	N	Y	N	N	N
NM_001168369.1	75453	N	N	N	N	Y	Y	N	N
NM_029292.3	75453	N	N	N	N	Y	Y	N	N
NM_029296.2	75462	N	N	N	N	Y	Y	N	N
NM_029298.1	75467	N	N	N	N	Y	Y	N	N
NM_029335.3	75556	N	N	N	N	Y	Y	N	N
NR_040741.1	75567	N	N	N	N	Y	N	N	N
NM_029342.4	75570	N	Y	N	N	N	N	N	N
NM_023784.5	75581	N	N	N	N	N	Y	N	N
NM_001102468.1	75600	N	N	N	N	N	Y	N	N
NM_138304.2	75600	N	N	N	N	N	Y	N	N
NR_045979.1	75630	N	N	N	N	Y	N	N	N
NM_183113.3	75721	N	N	N	N	Y	N	N	N
NR_040522.1	75722	N	N	N	N	Y	N	N	N
NM_001168382.1	75725	N	N	N	N	Y	Y	N	N
NM_029404.3	75725	N	N	N	N	Y	Y	N	N
NM_001167748.1	75740	N	N	N	N	Y	Y	N	N
NM_029412.1	75740	N	N	N	N	Y	Y	N	N
NM_001165980.1	75763	N	N	N	N	N	Y	N	N
NM_001165981.1	75763	N	N	N	N	N	Y	N	N
NM_001165982.1	75763	N	N	N	N	N	Y	N	N
NM_198005.2	75763	N	N	N	N	N	Y	N	N
NM_001243238.2	75799	N	N	N	N	Y	Y	N	N
NM_001305227.1	75799	N	N	N	N	Y	Y	N	N
NM_001159640.2	75812	N	N	N	N	Y	Y	N	N
NM_001159641.2	75812	N	N	N	N	Y	Y	N	N
NM_175225.5	75812	N	N	N	N	Y	Y	N	N
NR_110350.1	75812	N	N	N	N	Y	N	N	N
NR_110351.1	75812	N	N	N	N	Y	N	N	N
NR_110352.1	75812	N	N	N	N	Y	N	N	N
NM_001289502.1	75847	N	N	N	N	Y	Y	N	N
NM_001289503.1	75847	N	N	N	N	Y	Y	N	N
NM_001289504.1	75847	N	N	N	N	Y	Y	N	N
NM_178629.6	75847	N	N	N	N	Y	Y	N	N
NR_045070.1	75880	N	N	N	N	Y	N	N	N
NM_001081428.1	75906	N	N	N	N	Y	Y	N	N
NM_177077.2	75914	N	N	N	N	Y	Y	N	N
NM_001242372.1	76022	N	N	N	N	Y	Y	N	N
NM_027389.3	76022	N	N	N	N	Y	Y	N	N
NM_029509.4	76074	N	N	N	N	Y	Y	N	N
NM_001301831.1	76117	N	N	N	N	Y	Y	N	N
NM_001301832.1	76117	N	N	N	N	Y	Y	N	N
NM_153820.3	76117	N	N	N	N	Y	Y	N	N
NM_001162956.1	76138	N	N	N	N	Y	Y	N	N
NM_147218.2	76184	N	N	N	N	Y	Y	N	N
NM_001113468.1	76229	N	N	N	N	Y	Y	N	N
NR_003555.1	76229	N	N	N	N	Y	N	N	N
NM_029585.3	76375	N	N	N	N	Y	Y	N	N
NM_029597.1	76405	N	N	N	N	Y	Y	N	N
NM_023821.3	76469	N	N	N	N	Y	N	N	N
NM_029640.2	76510	N	N	N	N	Y	Y	N	N
NM_180662.2	76510	N	N	N	N	Y	Y	N	N
NM_028275.1	76633	N	N	N	N	N	Y	N	N
NM_029685.1	76640	N	N	N	N	N	Y	N	N
NM_001289660.1	76654	N	N	N	N	N	Y	N	N
NR_033618.2	76669	N	N	N	N	Y	N	N	N
NM_001082484.2	76742	N	N	N	N	Y	Y	N	N
NM_029721.2	76742	N	N	N	N	Y	Y	N	N
NM_001290196.1	76803	N	N	N	N	N	Y	N	N
NM_029760.2	76826	N	N	N	N	Y	Y	N	N
NM_029790.3	76894	N	N	N	N	Y	Y	N	N
NM_001163328.1	76897	N	N	N	N	Y	Y	N	N
NM_001163330.1	76897	N	N	N	N	N	Y	N	N
NM_178631.4	76897	N	N	N	N	Y	Y	N	N
NM_001163378.1	76967	N	N	N	N	Y	Y	N	N
NM_029818.1	76967	N	N	N	N	Y	N	N	N
NM_001244952.1	77018	N	N	N	N	Y	Y	N	N
NM_029838.4	77018	N	N	N	N	Y	Y	N	N
NM_198711.3	77018	N	N	N	N	Y	Y	N	N
NM_029847.4	77041	N	N	N	N	N	Y	N	N
NM_181071.3	77097	N	N	N	N	Y	N	N	N
NM_178633.3	77113	Y	Y	N	N	N	N	N	N
NM_175252.4	77117	N	N	N	N	Y	N	N	N
NR_040549.1	77127	N	N	N	N	Y	N	N	N
NR_040550.1	77127	N	N	N	N	Y	N	N	N
NR_131084.1	77442	N	N	N	N	Y	N	N	N
NR_131085.1	77442	N	N	N	N	Y	N	N	N
NM_175256.5	77446	N	N	N	N	N	Y	N	N
NM_001001980.2	77569	N	N	N	N	Y	Y	N	N
NM_001256122.1	77569	N	N	N	N	Y	N	N	N
NM_029929.3	77573	N	N	N	N	N	Y	N	N
NR_131089.1	77631	N	N	N	N	Y	N	N	N
NM_029949.3	77634	N	N	N	N	Y	Y	N	N
NM_023876.4	77766	N	N	N	N	Y	Y	N	N
NM_001100451.2	77853	Y	Y	N	N	N	N	N	N
NM_030014.2	77963	N	N	N	N	Y	Y	N	N
NM_198007.2	77987	N	N	N	N	Y	Y	N	N
NM_030025.2	78016	N	N	N	N	Y	Y	N	N
NR_040629.1	78112	N	N	N	N	Y	N	N	N
NR_108098.1	78158	N	N	N	N	Y	N	N	N
NR_130999.1	78312	N	N	N	N	Y	N	N	N
NM_030110.1	78506	N	N	N	N	Y	Y	N	N
NR_040291.1	78605	N	N	N	N	N	N	N	Y
NM_001289780.1	78697	N	N	N	N	Y	Y	N	N
NM_001289781.1	78697	N	N	N	N	Y	Y	N	N
NM_178403.5	78697	N	N	N	N	Y	Y	N	N
NM_183135.1	78703	N	N	N	N	Y	Y	N	N
NR_131110.1	78758	N	N	N	N	Y	N	N	N
NM_030174.2	78771	N	N	N	N	Y	Y	N	N
NM_024282.3	78825	N	N	N	N	Y	Y	N	N
NM_030207.2	78887	N	N	N	N	Y	Y	N	N
NM_030226.3	78921	N	N	N	N	N	Y	N	N
NM_001048189.4	78933	N	N	N	N	N	Y	N	N
NM_001284190.1	78933	N	N	N	N	N	Y	N	N
NM_030231.3	78933	N	N	N	N	N	Y	N	N
NM_001308111.1	79201	N	N	N	N	Y	Y	N	N
NM_024290.4	79201	N	N	N	N	Y	Y	N	N
NR_131763.1	79201	N	N	N	N	Y	N	N	N
NM_001271386.1	79221	N	N	N	N	Y	N	N	N
NM_024470.1	79410	N	N	N	N	N	Y	N	N
NM_030254.3	80286	Y	N	N	N	Y	N	N	N
NM_001199245.1	80334	N	N	N	N	N	Y	N	N
NM_001077687.1	80877	N	N	N	N	Y	Y	N	N
NM_001077688.1	80877	N	N	N	N	Y	Y	N	N
NM_030695.2	80877	N	N	N	N	Y	Y	N	N
NM_001163348.1	80883	N	N	N	N	Y	Y	N	N
NM_001163349.1	80883	N	N	N	N	Y	Y	N	N
NM_001163350.1	80883	N	N	N	N	Y	Y	N	N
NM_001163351.1	80883	N	N	N	N	Y	Y	N	N
NM_030699.2	80883	N	N	N	N	Y	Y	N	N
NM_133488.1	80883	N	N	N	N	Y	Y	N	N
NM_030711.4	80898	N	N	N	N	Y	Y	N	N
NM_030740.1	81015	N	N	N	N	N	N	Y	N
NM_023186.3	81600	N	N	N	N	N	Y	N	N
NM_133190.2	81905	N	N	N	N	Y	Y	N	N
NM_031378.3	83492	N	N	N	N	Y	Y	N	N
NM_030692.4	83493	N	N	N	N	Y	Y	N	N
NM_001167997.1	83558	N	N	N	N	Y	Y	N	N
NM_031384.2	83558	N	N	N	N	Y	Y	N	N
NM_031388.2	83563	N	N	N	N	Y	N	N	N
NM_031389.2	83564	N	N	N	N	Y	Y	N	N
NM_031390.2	83565	N	N	N	N	N	Y	N	N
NM_031395.2	83672	N	N	N	N	Y	Y	N	N
NM_183368.2	83672	N	N	N	N	Y	Y	N	N
NM_183370.2	83672	N	N	N	N	Y	Y	N	N
NM_001347189.1	83675	N	N	N	N	Y	Y	N	N
NM_031397.3	83675	N	N	N	N	Y	Y	N	N
NM_032007.3	83996	N	N	N	N	Y	Y	N	N
NM_032465.2	84544	N	N	N	N	Y	Y	N	N
NM_053105.2	93688	N	N	N	N	Y	Y	N	N
NM_001122850.1	93742	N	N	N	N	Y	Y	N	N
NM_001309391.1	93742	N	N	N	N	Y	Y	N	N
NM_001309392.1	93742	N	N	N	N	Y	Y	N	N
NM_033620.2	93742	N	N	N	N	Y	Y	N	N
NM_053122.4	93757	Y	Y	N	N	Y	Y	N	N
NM_001290708.1	93761	N	N	N	N	Y	Y	N	N
NM_053123.4	93761	N	N	N	N	Y	Y	N	N
NM_011455.3	93806	N	N	N	N	N	Y	N	N
NM_001142570.1	93837	N	N	N	N	Y	Y	N	N
NM_001289732.1	93837	N	N	N	N	Y	Y	N	N
NM_001289733.1	93837	N	N	N	N	Y	Y	N	N
NM_001289734.1	93837	N	N	N	N	Y	Y	N	N
NM_033605.2	93837	N	N	N	N	Y	Y	N	N
NM_053150.2	93967	N	N	N	N	Y	Y	N	N
NM_053153.2	93970	N	N	N	N	Y	Y	N	Y
NM_053171.2	94109	N	N	N	N	Y	Y	N	N
NM_053172.2	94111	N	N	N	N	N	Y	N	N
NM_033374.3	94176	Y	Y	N	N	Y	Y	N	N
NM_001313754.1	94190	N	N	N	N	Y	Y	N	N
NM_001313755.1	94190	N	N	N	N	Y	Y	N	N
NM_052976.4	94190	N	N	N	N	Y	Y	N	N
NM_053011.2	94217	N	N	N	N	Y	Y	N	N
NM_001242378.1	94229	N	N	N	N	Y	Y	N	N
NM_001242379.1	94229	N	N	N	N	Y	Y	N	N
NM_001242380.1	94229	N	N	N	N	Y	Y	N	N
NM_001242381.1	94229	N	N	N	N	Y	Y	N	N
NM_001242382.1	94229	N	N	N	N	Y	Y	N	N
NM_001242383.1	94229	N	N	N	N	Y	Y	N	N
NM_033552.3	94229	N	N	N	N	Y	Y	N	N
NM_053195.2	94249	N	N	N	N	N	Y	N	N
NM_001310767.1	98314	N	N	N	N	Y	Y	N	N
NM_178882.4	98314	N	N	N	N	Y	Y	N	N
NM_133821.3	98432	N	N	N	N	Y	Y	N	N
NM_001033194.3	98488	N	N	N	N	Y	Y	N	N
NM_001003948.2	98496	N	N	N	N	Y	Y	N	N
NM_001098528.2	98741	N	N	N	N	Y	Y	N	N
NM_001159354.1	99470	N	N	N	N	Y	Y	N	N
NM_133853.3	99470	N	N	N	N	Y	Y	N	N
NM_170778.2	99586	N	N	N	N	Y	Y	N	N
NM_201258.2	100012	N	N	N	N	N	Y	N	N
NM_001004141.2	100066	N	N	N	N	Y	Y	N	N
NM_133891.3	100434	N	N	N	N	Y	N	N	N
NM_194336.2	100702	N	N	N	N	N	Y	N	N
NM_001190734.1	100737	N	N	N	N	N	Y	N	N
NM_133921.2	100978	N	N	N	N	Y	Y	N	N
NM_207210.2	101320	N	N	N	N	N	Y	N	N
NM_199446.1	102093	N	N	N	N	Y	Y	N	N
NM_175331.3	103466	N	N	N	N	Y	Y	N	N
NM_001271347.1	103583	N	N	N	N	Y	N	N	N
NM_001271348.1	103583	N	N	N	N	Y	N	N	N
NM_001271349.1	103583	N	N	N	N	Y	N	N	N
NM_134015.3	103583	N	N	N	N	Y	N	N	N
NM_001038619.1	103967	N	N	N	N	Y	Y	N	N
NM_172646.2	103967	N	N	N	N	Y	Y	N	N
NM_175500.4	103978	N	N	N	N	Y	Y	N	N
NM_001286448.1	104001	N	N	N	N	Y	Y	N	N
NM_153457.7	104001	N	N	N	N	Y	Y	N	N
NM_001014981.1	104082	N	N	N	N	Y	Y	N	N
NM_172015.3	105148	N	N	N	N	Y	Y	N	N
NM_134072.1	105387	N	N	N	N	Y	Y	N	N
NM_001033214.2	105418	N	N	N	N	N	Y	N	N
NM_001346536.1	105418	N	N	N	N	N	Y	N	N
NM_207216.2	105887	N	N	N	N	Y	Y	N	N
NM_134123.3	106583	N	N	N	N	Y	Y	N	N
NM_001162864.1	106763	N	N	N	N	Y	Y	N	N
NM_001348180.1	107351	N	N	N	N	Y	N	N	N
NM_181404.6	107351	N	N	N	N	Y	N	N	N
NM_175353.2	107371	N	N	N	N	Y	Y	N	N
NM_001276292.1	107568	N	N	N	N	Y	Y	N	N
NM_177327.5	107568	N	N	N	N	Y	Y	N	N
NR_074089.1	107568	N	N	N	N	Y	N	N	N
NR_074090.1	107568	N	N	N	N	Y	N	N	N
NM_139300.3	107589	N	N	N	N	Y	Y	N	N
NM_133649.2	107723	N	N	N	N	Y	Y	N	N
NM_001290651.1	107815	N	N	N	N	Y	Y	N	N
NM_001290652.1	107815	N	N	N	N	Y	Y	N	N
NM_001346640.1	108073	N	N	N	N	Y	Y	N	N
NM_177328.3	108073	N	N	N	N	Y	Y	N	N
NM_178143.2	108079	N	N	N	N	N	Y	N	N
NM_028882.4	108151	N	N	N	N	Y	Y	N	N
NM_001310442.1	108664	N	N	N	N	Y	Y	N	N
NM_133826.5	108664	N	N	N	N	Y	Y	N	N
NM_175358.4	108672	N	N	N	N	Y	Y	N	N
NM_176841.4	108686	N	N	N	N	Y	Y	N	N
NM_001113246.2	108699	N	N	N	N	Y	N	N	N
NM_001166603.1	108699	N	N	N	N	Y	N	N	N
NM_001310649.1	108811	N	N	N	N	N	Y	N	N
NM_175369.4	108811	N	N	N	N	N	Y	N	N
NM_030194.1	109032	N	N	N	N	Y	Y	N	N
NM_175397.4	109032	N	N	N	N	Y	Y	N	N
NR_045311.1	109198	N	N	N	N	Y	N	N	N
NM_181407.4	109264	N	N	N	N	Y	Y	N	N
NM_029525.1	109294	N	N	N	N	Y	Y	N	N
NM_001033227.2	109342	N	N	N	N	Y	Y	N	N
NM_001327938.1	109676	N	N	N	N	Y	N	N	N
NM_001327939.1	109676	N	N	N	N	Y	N	N	N
NM_001289730.1	109904	N	N	N	N	Y	Y	N	N
NM_001289731.1	109904	N	N	N	N	Y	Y	N	N
NM_133197.4	109904	N	N	N	N	Y	Y	N	N
NM_133365.3	110082	N	N	N	N	Y	Y	N	N
NM_001177878.1	110094	N	N	N	N	Y	Y	N	N
NM_001177879.1	110094	N	N	N	N	Y	Y	N	N
NM_172783.3	110094	N	N	N	N	Y	Y	N	N
NM_080438.2	110304	N	N	N	N	Y	Y	N	N
NM_029851.2	110350	N	N	N	N	Y	Y	N	N
NM_007772.2	110521	N	N	N	N	Y	N	N	N
NM_001201460.1	110558	N	N	N	N	N	N	N	Y
NM_175481.5	110637	N	N	N	N	Y	Y	N	N
NM_033652.5	110648	N	N	N	N	Y	Y	N	N
NM_054053.4	110789	N	N	N	N	Y	Y	N	N
NM_144844.2	110821	N	N	N	N	Y	Y	N	N
NM_152923.2	110862	N	N	N	N	Y	Y	N	N
NM_145078.2	112422	N	N	N	N	Y	N	N	N
NM_053242.4	114142	N	N	N	N	Y	N	N	N
NM_053251.1	114600	N	Y	N	N	N	Y	N	N
NM_054072.1	116731	N	N	N	N	Y	Y	N	N
NM_001012623.1	116837	Y	Y	N	N	N	N	N	N
NM_001012624.1	116837	Y	Y	N	N	N	N	N	N
NM_001012625.1	116837	Y	Y	N	N	N	N	N	N
NM_053270.1	116837	Y	Y	N	N	N	N	N	N
NM_183018.2	116837	Y	Y	N	N	N	N	N	N
NM_001256382.1	116838	N	N	N	N	Y	Y	N	N
NM_001256383.1	116838	N	N	N	N	Y	Y	N	N
NM_053271.2	116838	N	N	N	N	Y	Y	N	N
NM_001012363.2	117591	N	N	N	N	N	Y	N	N
NM_001102414.1	117591	N	N	N	N	Y	Y	N	N
NM_001102415.1	117591	N	N	N	N	Y	Y	N	N
NM_145559.2	117591	N	N	N	N	N	Y	N	N
NM_080640.5	118452	N	Y	N	N	N	N	N	N
NM_080462.2	140483	N	N	N	N	Y	Y	N	N
NM_023670.3	140488	N	N	N	N	Y	Y	N	N
NM_001312905.1	140492	N	N	N	N	Y	N	N	N
NM_080470.1	140557	N	N	N	N	Y	Y	N	N
NM_080288.2	140580	N	N	N	N	Y	Y	N	N
NM_198093.3	140580	N	N	N	N	Y	N	N	N
NM_130457.2	170571	N	N	N	N	Y	Y	N	N
NM_130880.1	170711	N	N	N	N	Y	Y	N	N
NM_130886.3	170720	N	N	N	N	Y	Y	N	N
NM_133203.5	170733	N	N	N	N	Y	Y	N	N
NM_133207.2	170738	N	N	N	N	Y	Y	N	N
NM_133212.3	170744	N	N	N	N	Y	N	N	N
NM_133235.3	170771	N	N	N	N	N	Y	N	N
NM_133236.3	170772	N	N	N	N	Y	Y	N	N
NM_133245.1	170812	N	N	Y	N	N	N	N	N
NM_133353.3	170834	N	N	N	N	Y	Y	N	N
NM_134217.1	171251	N	N	N	N	N	N	Y	N
NM_001166631.1	171283	N	N	N	N	Y	Y	N	N
NM_001166632.1	171283	N	N	N	N	Y	Y	N	N
NM_134248.2	171283	N	N	N	N	Y	Y	N	N
NM_134256.1	171405	N	N	N	N	Y	Y	N	N
NM_134420.4	171429	Y	Y	N	N	N	N	N	N
NM_138654.3	192136	N	N	N	N	Y	Y	N	N
NM_138661.1	192161	N	N	N	N	Y	Y	N	N
NM_138662.1	192163	N	N	N	N	Y	Y	N	N
NM_138663.2	192164	N	N	N	N	Y	Y	N	N
NM_001163387.1	192167	N	N	N	N	Y	Y	N	N
NM_138666.3	192167	N	N	N	N	Y	Y	N	N
NM_138674.2	192190	N	N	N	N	Y	N	N	N
NM_138758.1	192289	N	N	N	N	Y	Y	N	N
NM_001081327.1	195646	N	N	N	N	Y	Y	N	N
NM_144785.2	207151	N	N	N	N	Y	Y	N	N
NM_001172121.1	207181	N	N	N	N	Y	Y	N	N
NM_001172122.1	207181	N	N	N	N	Y	Y	N	N
NM_001172123.1	207181	N	N	N	N	Y	Y	N	N
NM_001172124.1	207181	N	N	N	N	Y	Y	N	N
NM_001172126.1	207181	N	N	N	N	Y	Y	N	N
NM_178660.4	207181	N	N	N	N	Y	Y	N	N
NM_001037321.1	207215	N	N	N	N	Y	Y	N	N
NM_001114611.1	207227	N	N	N	N	Y	Y	N	N
NM_001114612.1	207227	N	N	N	N	Y	Y	N	N
NM_001114613.1	207227	N	N	N	N	Y	Y	N	N
NM_172440.3	207227	N	N	N	N	Y	Y	N	N
NM_198105.2	207375	N	N	N	N	Y	Y	N	N
NM_001039388.2	207615	N	N	N	N	Y	Y	N	N
NM_172445.3	207615	N	N	N	N	Y	Y	N	N
NM_001163223.1	207618	N	N	N	N	N	Y	N	N
NM_172447.2	207686	N	N	N	N	Y	Y	N	N
NM_198106.4	208169	N	N	N	N	Y	Y	N	N
NM_001168525.1	208449	N	N	N	N	Y	N	N	N
NM_144792.4	208449	N	N	N	N	Y	N	N	N
NM_172461.3	208583	N	N	N	N	Y	Y	N	N
NM_001171801.1	208820	N	N	N	N	Y	N	N	N
NM_173746.3	208820	N	N	N	N	Y	N	N	N
NM_153413.2	208869	N	N	N	N	Y	Y	N	N
NM_145947.2	208890	N	N	N	N	Y	Y	N	N
NM_001081153.1	208898	N	N	N	N	Y	Y	N	N
NM_173376.3	209003	N	N	N	N	Y	Y	N	N
NM_001085499.1	209005	N	N	N	N	Y	Y	N	N
NM_177589.3	209012	N	N	N	N	Y	Y	N	N
NM_001285893.1	209018	N	N	N	N	Y	Y	N	N
NM_001285894.1	209018	N	N	N	N	Y	Y	N	N
NM_172473.3	209462	N	N	N	N	Y	Y	N	N
NM_001199357.1	209497	N	N	N	N	N	Y	N	N
NM_001199360.1	209497	N	N	N	N	Y	Y	N	N
NM_177592.4	209497	N	N	N	N	Y	Y	N	N
NM_173748.4	209586	N	N	N	N	Y	Y	N	N
NM_001347086.1	209630	N	N	N	N	Y	N	N	N
NM_153534.2	210044	N	N	N	N	Y	Y	N	N
NM_001081756.1	210356	N	N	N	N	Y	N	N	N
NM_176957.3	210356	N	N	N	N	Y	Y	N	N
NM_172485.3	210417	N	N	N	N	Y	Y	N	N
NM_177595.4	210719	N	N	N	N	Y	Y	N	N
NM_001305663.1	210757	N	N	N	N	Y	Y	N	N
NM_178666.6	210757	N	N	N	N	Y	Y	N	N
NM_001347498.1	210801	N	N	N	N	Y	Y	N	N
NM_001347499.1	210801	N	N	N	N	Y	Y	N	N
NM_001347500.1	210801	N	N	N	N	Y	Y	N	N
NM_001347501.1	210801	N	N	N	N	Y	Y	N	N
NM_153135.3	210801	N	N	N	N	Y	Y	N	N
NM_175642.4	210933	N	N	N	N	Y	Y	N	N
NM_145959.3	210998	N	N	N	N	Y	Y	N	N
NM_172490.3	211006	N	N	N	N	N	Y	N	N
NM_001324406.1	211378	N	N	N	N	Y	Y	N	N
NM_001031811.2	211468	N	N	N	N	Y	Y	N	N
NM_001081377.2	211712	N	N	N	N	Y	Y	N	N
NM_001271798.1	211712	N	N	N	N	Y	Y	N	N
NM_001271799.1	211712	N	N	N	N	Y	Y	N	N
NM_001271800.1	211712	N	N	N	N	Y	Y	N	N
NM_001346722.1	211712	N	N	N	N	Y	Y	N	N
NM_001167777.1	211961	N	N	N	N	Y	N	N	N
NR_073203.1	212085	N	N	N	N	Y	N	N	N
NM_175437.3	212167	N	N	N	N	Y	Y	N	N
NM_001162941.1	212307	N	N	N	N	N	Y	N	N
NM_001162942.1	212307	N	N	N	N	N	Y	N	N
NM_153058.4	212307	N	N	N	N	N	Y	N	N
NM_172505.4	212427	N	N	N	Y	N	N	N	N
NM_001162957.1	212892	N	N	N	N	N	Y	N	N
NM_001114660.2	212986	N	N	N	N	Y	Y	N	N
NM_001286437.1	212986	N	N	N	N	Y	Y	N	N
NM_178672.7	212986	N	N	N	N	Y	Y	N	N
NM_001081080.1	213109	N	N	N	N	Y	N	N	N
NM_001253719.1	213262	N	N	N	N	Y	Y	N	N
NM_178673.4	213262	N	N	N	N	Y	Y	N	N
NM_001297612.1	213435	N	N	N	N	Y	Y	N	N
NM_175441.5	213435	N	N	N	N	Y	Y	N	N
NM_001037865.1	213945	N	N	N	N	Y	Y	N	N
NM_153402.2	214150	N	N	N	N	Y	Y	N	N
NM_001029977.3	214403	N	N	N	N	Y	Y	N	N
NM_001160303.1	214403	N	N	N	N	Y	Y	N	N
NM_001160304.1	214403	N	N	N	N	Y	Y	N	N
NM_001313762.1	214444	N	N	N	N	Y	Y	N	N
NM_145990.4	214444	N	N	N	N	Y	Y	N	N
NM_001039534.1	214580	N	N	N	N	Y	Y	N	N
NM_001033256.4	214616	N	Y	N	N	N	N	N	N
NM_001081351.1	214642	N	N	N	N	Y	Y	N	N
NM_145997.2	214899	N	N	N	N	N	Y	N	N
NM_178061.5	214944	N	N	N	N	Y	Y	N	N
NM_178675.4	215085	N	N	N	N	Y	Y	N	N
NM_001145807.1	215378	N	N	N	N	Y	Y	N	N
NM_153539.3	215378	N	N	N	N	Y	Y	N	N
NM_001122603.1	215384	N	N	N	N	Y	Y	N	N
NM_001008420.2	215654	N	N	N	N	N	Y	N	N
NM_001162375.1	215708	N	N	N	N	Y	Y	N	N
NM_174868.4	215708	N	N	N	N	Y	Y	N	N
NM_172546.2	215748	N	N	N	N	Y	N	N	N
NM_175448.3	215890	N	N	N	N	Y	Y	N	N
NM_145743.2	215951	N	N	N	N	Y	Y	N	N
NM_001291442.1	216001	N	N	N	N	Y	Y	N	N
NM_001291443.1	216001	N	N	N	N	Y	Y	N	N
NM_144822.3	216001	N	N	N	N	Y	Y	N	N
NM_001164376.1	216033	N	N	N	N	Y	Y	N	N
NM_001164519.1	216033	N	N	N	N	Y	Y	N	N
NM_177612.3	216033	N	N	N	N	Y	Y	N	N
NM_207522.2	216292	N	N	N	N	Y	Y	N	N
NR_110482.1	216377	N	N	N	N	N	N	Y	N
NM_001291049.1	216835	N	N	N	N	Y	Y	N	N
NM_173754.4	216835	N	N	N	N	Y	Y	N	N
NM_173755.3	217342	N	N	N	N	N	Y	N	N
NM_178681.4	217480	N	N	N	N	Y	Y	N	N
NM_001301404.1	217847	N	N	N	N	Y	Y	N	N
NM_144834.4	217847	N	N	N	N	Y	Y	N	N
NM_001160385.2	217951	N	N	N	N	Y	Y	N	N
NM_001294146.1	217951	N	N	N	N	Y	Y	N	N
NM_001294154.1	217951	N	N	N	N	Y	Y	N	N
NM_175006.2	218030	N	Y	N	N	N	N	N	N
NM_172120.4	218035	N	N	N	N	Y	Y	N	N
NM_001289546.1	218038	N	N	N	N	N	Y	N	N
NM_175007.2	218038	N	N	N	N	N	Y	N	N
NM_153546.4	218121	N	N	N	N	N	Y	N	N
NM_146041.2	218138	N	N	N	N	N	Y	N	N
NM_172143.2	218165	N	N	N	N	Y	Y	N	N
NM_172595.4	218639	N	N	N	N	Y	Y	N	N
NM_001289760.1	218772	N	N	N	N	Y	Y	N	N
NM_001289761.1	218772	N	N	N	N	Y	Y	N	N
NM_001289762.1	218772	N	N	N	N	Y	Y	N	N
NM_011243.2	218772	N	N	N	N	Y	Y	N	N
NM_144839.1	218793	N	N	N	N	Y	Y	N	N
NM_173393.2	219149	N	N	N	N	Y	Y	N	N
NM_027906.1	219189	N	N	N	N	Y	Y	N	N
NM_173758.3	219189	N	N	N	N	Y	Y	N	N
NM_145467.2	223272	N	N	N	N	Y	Y	N	N
NM_198024.2	223332	Y	Y	N	N	Y	Y	N	N
NM_144848.2	223650	N	Y	N	N	N	N	N	N
NM_001082536.1	223701	N	N	N	N	Y	N	N	N
NM_145476.2	223754	N	N	N	N	Y	Y	N	N
NM_001164785.1	223838	N	N	N	N	Y	Y	N	N
NM_001164786.1	223838	N	N	N	N	Y	Y	N	N
NM_177431.5	223838	N	N	N	N	Y	Y	N	N
NM_001310066.1	223922	N	N	N	N	Y	N	N	N
NM_001310070.1	223922	N	N	N	N	Y	N	N	N
NM_146068.4	224008	N	N	N	N	Y	Y	N	N
NM_001301817.1	224014	N	N	N	N	N	Y	N	N
NM_001164612.1	224079	N	N	N	N	Y	Y	N	N
NM_001164613.1	224079	N	N	N	N	Y	Y	N	N
NM_172613.4	224079	N	N	N	N	Y	Y	N	N
NM_001110017.1	224170	N	N	N	N	Y	Y	N	N
NM_027341.2	224170	N	N	N	N	Y	Y	N	N
NM_001097623.2	224829	N	N	N	N	Y	Y	N	N
NM_172622.3	224829	N	N	N	N	Y	Y	N	N
NM_001347411.1	224997	N	N	N	N	Y	N	N	N
NM_001347412.1	224997	N	N	N	N	Y	N	N	N
NM_001347449.1	225115	N	N	N	N	N	Y	N	N
NM_153153.3	225115	N	N	N	N	N	Y	N	N
NM_001033532.3	225289	N	N	N	N	Y	Y	N	N
NM_001033281.3	225518	N	N	N	N	Y	Y	N	N
NM_013666.2	225742	N	N	N	N	Y	Y	N	N
NM_153124.2	225742	N	N	N	N	Y	Y	N	N
NM_153417.1	225997	N	N	N	N	Y	Y	N	N
NM_001035239.2	226025	N	N	N	N	Y	Y	N	N
NM_001035240.2	226025	N	N	N	N	Y	Y	N	N
NM_001035241.2	226025	N	N	N	N	Y	Y	N	N
NM_001035242.1	226025	N	N	N	N	Y	Y	N	N
NM_001035243.2	226025	N	N	N	N	Y	Y	N	N
NM_001035244.1	226025	N	N	N	N	Y	Y	N	N
NM_177341.4	226025	N	N	N	N	Y	Y	N	N
NM_175013.2	226041	N	N	N	N	Y	Y	N	N
NM_145499.2	226105	N	N	N	N	N	Y	N	N
NM_172648.3	226695	N	N	N	N	Y	Y	N	N
NM_144881.4	226861	N	N	N	N	Y	Y	N	N
NM_146108.2	227095	N	N	N	N	Y	Y	N	N
NM_001114663.1	227120	N	N	N	N	Y	Y	N	N
NM_152915.1	227325	N	N	N	N	Y	Y	N	N
NM_001290374.1	227541	N	N	N	N	Y	Y	N	N
NM_001290375.1	227541	N	N	N	N	Y	Y	N	N
NM_177343.4	227541	N	N	N	N	Y	Y	N	N
NM_146122.3	227801	N	N	N	N	Y	Y	N	N
NM_172662.3	227835	N	N	N	N	Y	Y	N	N
NM_001001178.1	227933	N	N	N	N	Y	Y	N	N
NM_175465.6	228071	N	N	N	N	Y	Y	N	N
NM_175467.3	228677	N	N	N	N	Y	Y	N	N
NM_153384.3	229320	N	N	N	N	Y	Y	N	N
NM_153385.3	229320	N	N	N	N	Y	Y	N	N
NM_153386.3	229320	N	N	N	N	Y	Y	N	N
NM_177346.4	229357	N	N	N	N	Y	Y	N	N
NM_172685.3	229731	N	N	N	N	N	Y	N	N
NM_153458.3	229759	N	N	N	N	Y	N	N	N
NM_139148.2	229927	N	N	N	N	Y	Y	N	N
NM_001081277.1	229949	N	N	N	N	Y	Y	N	N
NM_001081184.1	230393	N	N	N	N	Y	Y	N	N
NM_145549.1	230500	N	Y	N	N	N	N	N	N
NM_001290645.2	230558	N	N	N	N	N	Y	N	N
NM_001316667.1	230558	N	N	N	N	N	Y	N	N
NM_146148.2	230558	N	N	N	N	N	Y	N	N
NM_001347163.1	230597	N	N	N	N	Y	Y	N	N
NM_001103199.1	230622	N	N	N	N	Y	Y	N	N
NM_001166027.1	230623	N	N	N	N	Y	Y	N	N
NM_177669.4	230623	N	N	N	N	N	Y	N	N
NM_181040.4	230649	N	N	N	N	N	Y	N	N
NM_001163792.1	230789	N	N	N	N	N	Y	N	N
NM_145553.2	230789	N	N	N	N	N	Y	N	N
NM_172706.3	231014	N	N	N	N	Y	Y	N	N
NM_181323.2	231293	N	N	N	N	Y	N	N	N
NM_172146.2	231327	N	N	N	N	Y	Y	N	N
NM_182841.1	231503	N	N	N	N	Y	N	N	N
NM_029270.2	231532	N	N	N	N	Y	Y	N	N
NM_146161.3	231532	N	N	N	N	Y	N	N	N
NM_001104624.1	231589	N	N	N	N	N	Y	N	N
NM_001327821.1	231991	N	N	N	N	Y	Y	N	N
NM_001164316.1	232035	N	N	N	N	Y	Y	N	N
NM_183310.2	232035	N	N	N	N	Y	Y	N	N
NM_198612.2	232313	N	N	N	N	Y	Y	N	N
NM_175628.3	232345	N	N	N	N	Y	Y	N	N
NM_001104642.1	232367	N	N	N	N	Y	Y	N	N
NM_001171003.1	232714	N	N	N	N	N	Y	N	N
NM_177690.3	232827	N	N	N	N	Y	Y	N	N
NM_183166.2	233164	N	N	N	N	N	Y	N	N
NM_178705.5	233271	N	N	N	N	N	Y	N	N
NM_001278943.1	233810	N	N	N	N	Y	Y	N	N
NM_001278944.1	233810	N	N	N	N	Y	Y	N	N
NM_027626.1	234353	N	N	N	N	Y	Y	N	N
NM_030263.5	234353	N	N	N	N	Y	Y	N	N
NM_177698.4	234353	N	N	N	N	Y	Y	N	N
NM_001252623.1	234356	N	N	N	N	Y	Y	N	N
NM_172753.5	234356	N	N	N	N	Y	Y	N	N
NM_001024617.3	234515	N	N	N	N	Y	Y	N	N
NM_001297591.1	234515	N	N	N	N	Y	Y	N	N
NM_001297593.1	234515	N	N	N	N	Y	Y	N	N
NM_001297596.1	234515	N	N	N	N	Y	Y	N	N
NM_001033322.2	234889	N	N	N	N	Y	Y	N	N
NM_172290.3	235106	N	N	N	N	Y	Y	N	N
NM_001033324.2	235320	N	N	N	N	Y	Y	N	N
NM_177350.5	235379	N	N	N	N	Y	Y	N	N
NM_175484.3	235431	N	N	N	N	Y	Y	N	N
NM_001161362.3	235542	N	N	N	N	N	Y	N	N
NM_172144.3	235542	N	N	N	N	N	Y	N	N
NM_001163026.1	235567	N	N	N	N	Y	Y	N	N
NM_001004145.3	235779	N	Y	N	N	N	N	N	N
NM_001346422.1	235779	N	Y	N	N	N	Y	N	N
NM_001033326.2	236082	N	N	N	N	N	Y	N	N
NM_001347426.1	236293	N	N	N	N	Y	Y	N	N
NM_172776.2	236293	N	N	N	N	Y	Y	N	N
NM_001033157.4	236366	N	N	N	N	N	Y	N	N
NM_001201330.1	236366	N	N	N	N	N	Y	N	N
NM_001164327.1	236451	N	N	N	N	N	Y	N	N
NM_172777.3	236573	N	N	N	N	Y	Y	N	N
NR_003279.1	236598	Y	N	N	N	N	N	N	N
NM_001290728.1	236643	N	N	N	N	Y	Y	N	N
NM_177704.3	236643	N	N	N	N	Y	Y	N	N
NM_001290477.1	237010	N	N	N	N	Y	Y	N	N
NM_001290478.1	237010	N	N	N	N	Y	Y	N	N
NM_172781.2	237010	N	N	N	N	Y	Y	N	N
NM_001172147.1	237073	N	N	N	N	Y	Y	N	N
NM_001172148.1	237073	N	N	N	N	Y	Y	N	N
NM_001290630.1	237073	N	N	N	N	Y	Y	N	N
NM_153586.2	237073	N	N	N	N	Y	Y	N	N
NM_178358.3	237091	N	N	N	N	Y	Y	N	N
NM_011147.1	237178	N	N	N	N	Y	Y	N	N
NM_172786.2	237313	N	N	N	N	N	Y	N	N
NM_146241.2	237553	N	N	N	N	Y	Y	N	N
NM_146016.2	237711	N	N	N	N	Y	N	N	N
NM_001029934.1	237898	N	N	N	N	Y	Y	N	N
NM_172799.4	237930	N	N	N	N	Y	Y	N	N
NM_001163126.1	238123	N	N	N	N	Y	Y	N	N
NM_198111.2	238161	N	N	N	N	Y	Y	N	N
NM_001310586.1	238205	N	N	N	N	Y	N	N	N
NM_178714.5	238205	N	N	N	N	Y	N	N	N
NM_001081195.1	238247	N	N	N	N	Y	Y	N	N
NM_172805.3	238271	N	N	N	N	Y	Y	N	N
NM_001081129.1	238680	N	N	N	N	Y	N	N	N
NM_177355.3	239318	N	N	N	N	Y	Y	N	N
NM_175501.3	239337	N	N	N	N	Y	Y	N	N
NM_172815.3	239405	N	N	N	N	Y	Y	N	N
NM_001081391.2	239420	N	N	N	N	Y	Y	N	N
NM_173422.3	239447	N	N	N	N	Y	Y	N	N
NM_207243.2	239611	N	Y	N	N	N	Y	N	N
NM_001164593.1	239618	N	N	N	N	Y	Y	N	N
NM_001164594.1	239618	N	N	N	N	Y	Y	N	N
NM_001145977.1	239857	N	N	N	N	Y	N	N	N
NM_001347247.1	239857	N	N	N	N	Y	N	N	N
NM_178721.4	239857	N	N	N	N	Y	Y	N	N
NM_172827.3	240028	N	N	N	N	Y	Y	N	N
NM_183021.3	240174	N	N	N	N	Y	N	N	N
NM_001081963.1	240185	N	N	N	N	Y	Y	N	N
NM_175506.4	240322	N	N	N	N	Y	Y	N	N
NM_053099.2	240427	N	N	N	N	Y	Y	N	N
NM_001205349.1	240633	N	N	N	N	Y	Y	N	N
NM_172837.4	240633	N	N	N	N	Y	Y	N	N
NM_207583.2	240843	N	N	N	N	Y	N	N	N
NM_001143956.1	240879	N	N	N	N	Y	Y	N	N
NM_153179.3	241035	N	N	N	N	Y	Y	N	N
NM_172851.2	241175	N	N	N	N	Y	Y	N	N
NM_001001309.3	241226	N	N	N	N	Y	Y	N	N
NR_138462.1	241226	N	N	N	N	Y	N	N	N
NM_001004761.1	241263	N	N	N	N	Y	Y	N	N
NM_001347161.1	241447	N	N	N	N	Y	Y	N	N
NM_172856.4	241447	N	N	N	N	Y	Y	N	N
NM_178723.6	241494	N	N	N	N	Y	Y	N	N
NM_001289742.1	241568	N	N	N	N	Y	N	N	N
NM_001289743.1	241568	N	N	N	N	Y	N	N	N
NM_001165999.1	242384	N	N	N	N	Y	N	N	N
NM_001166000.1	242384	N	N	N	N	Y	N	N	N
NM_001081141.1	242425	N	N	N	N	Y	Y	N	N
NM_001033351.2	242443	N	N	N	N	Y	Y	N	N
NM_001276355.1	242443	N	N	N	N	Y	Y	N	N
NM_001017427.1	242505	N	N	N	N	Y	Y	N	N
NM_001163732.1	242506	N	N	N	N	Y	Y	N	N
NM_172869.4	242506	N	N	N	N	Y	Y	N	N
NM_001145967.1	242557	N	N	N	N	Y	Y	N	N
NM_175029.3	242557	N	N	N	N	Y	Y	N	N
NM_183024.1	242570	N	N	N	N	Y	Y	N	N
NM_001167876.1	242627	N	N	N	N	Y	Y	N	N
NM_001167878.1	242627	N	N	N	N	Y	Y	N	N
NM_001347311.1	242819	N	N	N	N	Y	Y	N	N
NM_198620.1	242819	N	N	N	N	Y	Y	N	N
NM_178730.3	243083	N	N	N	N	N	Y	N	N
NM_172885.2	243274	N	N	N	N	Y	Y	N	N
NM_001134743.1	243499	N	N	N	N	Y	Y	N	N
NM_001347261.1	243499	N	N	N	N	Y	Y	N	N
NM_153589.2	243634	N	N	N	N	Y	Y	N	N
NM_203491.3	243764	N	N	N	N	Y	N	N	N
NM_172895.3	243822	N	N	N	N	Y	Y	N	N
NM_194058.2	243874	N	N	N	N	Y	Y	N	N
NM_001034115.1	243961	N	N	N	N	Y	Y	N	N
NM_001199224.1	244071	N	N	N	N	Y	Y	N	N
NM_001145965.1	244310	N	N	N	N	Y	N	N	N
NM_172910.3	244310	N	N	N	N	Y	N	N	N
NM_145841.2	244431	N	N	N	N	Y	Y	N	N
NM_172912.4	244562	N	N	N	N	N	Y	N	N
NM_001033359.2	244682	N	N	N	N	Y	Y	N	N
NM_001170787.1	244682	N	N	N	N	Y	Y	N	N
NM_001081341.1	244891	N	N	N	N	Y	Y	N	N
NM_173435.3	245492	N	N	N	N	N	Y	N	N
NM_001310755.1	245525	N	N	N	N	Y	Y	N	N
NM_001271809.1	245578	N	N	N	N	Y	Y	N	N
NM_001271810.1	245578	N	N	N	N	Y	Y	N	N
NR_073451.1	245578	N	N	N	N	Y	N	N	N
NR_073452.1	245578	N	N	N	N	Y	N	N	N
NM_177748.2	245615	N	N	N	N	N	Y	N	N
NM_001007576.2	245650	N	N	N	N	Y	Y	N	N
NM_001101486.1	245884	N	N	N	N	N	Y	N	N
NM_172575.3	246196	N	N	N	N	Y	Y	N	N
NM_178845.3	246196	N	N	N	N	Y	Y	N	N
NM_145708.2	246792	N	N	N	N	N	N	N	Y
NM_146266.2	257666	N	N	N	N	N	N	N	Y
NM_001011736.1	257881	N	N	N	N	N	Y	N	N
NM_146384.1	258382	N	N	N	N	N	N	N	Y
NM_001271020.1	258961	N	N	N	N	Y	N	N	N
NM_153807.2	264895	N	N	N	N	N	Y	N	N
NM_001025581.1	268345	N	N	N	N	Y	Y	N	N
NM_178259.3	268379	N	N	N	N	Y	Y	N	N
NM_145965.2	268566	N	N	N	N	Y	Y	N	N
NM_172952.3	268566	N	N	N	N	Y	Y	N	N
NM_001289496.1	268780	N	N	N	N	Y	Y	N	N
NM_001289498.1	268780	N	N	N	N	Y	Y	N	N
NM_178748.6	268780	N	N	N	N	Y	Y	N	N
NM_001284375.1	268878	N	N	N	N	Y	Y	N	N
NM_175650.4	268878	N	N	N	N	Y	Y	N	N
NM_001347236.1	268890	N	N	N	N	Y	Y	N	N
NM_175548.3	268890	N	N	N	N	N	Y	N	N
NM_175549.4	268902	N	N	N	N	Y	Y	N	N
NM_173444.2	269198	N	N	N	N	Y	N	N	N
NM_001290410.1	269513	N	N	N	N	N	Y	N	N
NM_172987.2	269513	N	N	N	N	Y	Y	N	N
NM_172988.4	269514	N	N	N	N	Y	Y	N	N
NR_104378.1	269514	N	N	N	N	Y	N	N	N
NR_104379.1	269514	N	N	N	N	Y	N	N	N
NR_104380.1	269514	N	N	N	N	Y	N	N	N
NM_001081231.2	269629	N	N	N	N	Y	Y	N	N
NM_029990.1	269629	N	N	N	N	Y	Y	N	N
NM_177759.3	269693	N	N	N	N	Y	Y	N	N
NM_001109749.1	269784	N	N	N	N	Y	Y	N	N
NM_001109751.1	269784	N	N	N	N	Y	Y	N	N
NM_173004.3	269784	N	N	N	N	Y	Y	N	N
NM_177764.4	269902	N	N	N	N	N	Y	N	N
NM_001190374.1	269959	N	N	N	N	Y	Y	N	N
NM_001101488.1	269994	N	N	N	N	Y	Y	N	N
NM_175032.3	270049	N	N	N	N	Y	Y	N	N
NM_175561.4	270109	N	N	N	N	Y	Y	N	N
NM_001013813.3	270118	Y	Y	N	N	N	N	N	N
NM_177769.4	270162	N	N	N	N	Y	N	N	N
NM_001168296.1	270190	N	N	N	N	Y	N	N	N
NM_173447.3	270190	N	N	N	N	Y	N	N	N
NM_173023.2	271036	N	N	N	N	N	Y	N	N
NM_173029.3	271639	N	N	N	N	Y	Y	N	N
NM_173030.2	271786	N	N	N	N	Y	Y	N	N
NM_178756.4	272031	N	N	N	N	Y	Y	N	N
NM_027477.3	272347	N	N	N	N	Y	Y	N	N
NM_173034.3	272347	N	N	N	N	Y	N	N	N
NR_030763.1	272667	N	N	N	N	N	N	N	Y
NM_001126325.1	277668	N	N	N	N	N	N	N	Y
NM_177406.3	277753	N	N	N	N	Y	Y	N	N
NM_177787.4	277898	N	N	N	N	Y	Y	N	N
NM_177789.4	278180	N	N	N	N	N	Y	N	N
NM_001271678.1	279561	N	N	N	N	Y	Y	N	N
NM_001271679.1	279561	N	N	N	N	Y	Y	N	N
NM_145146.2	280662	N	N	N	N	Y	Y	N	N
NM_001081427.1	286940	N	N	N	N	Y	Y	N	N
NM_134080.1	286940	N	N	N	N	Y	Y	N	N
NR_003962.1	319210	N	N	N	N	N	N	N	Y
NM_001161483.1	319211	N	N	N	N	Y	Y	N	N
NM_001347509.1	319211	N	N	N	N	Y	Y	N	N
NM_001347510.1	319211	N	N	N	N	Y	Y	N	N
NM_199024.2	319211	N	N	N	N	Y	Y	N	N
NM_175674.3	319217	N	N	N	N	Y	Y	N	N
NM_175678.3	319239	N	N	N	N	N	Y	N	N
NM_001347367.1	319387	N	N	N	N	Y	Y	N	N
NM_001347368.1	319387	N	N	N	N	Y	Y	N	N
NM_001347369.1	319387	N	N	N	N	Y	Y	N	N
NM_001347371.1	319387	N	N	N	N	Y	Y	N	N
NM_198702.2	319387	N	N	N	N	Y	Y	N	N
NM_001081208.2	319415	N	N	N	N	Y	N	N	N
NM_001253355.1	319415	N	N	N	N	Y	N	N	N
NM_001253356.1	319415	N	N	N	N	Y	N	N	N
NR_015589.1	319472	N	N	N	N	Y	N	N	N
NM_001146031.1	319504	N	N	N	N	Y	N	N	N
NM_176930.4	319504	N	N	N	N	Y	N	N	N
NM_001033379.3	319618	N	N	N	N	Y	Y	N	N
NM_001195284.1	319636	N	N	N	N	Y	Y	N	N
NM_178767.5	319660	N	N	N	N	Y	Y	N	N
NM_176996.4	319757	N	N	N	N	Y	Y	N	N
NM_177002.3	319800	N	N	N	N	Y	Y	N	N
NM_177006.3	319807	N	N	N	N	Y	N	N	N
NR_030692.1	319818	N	N	N	N	Y	N	N	N
NM_177010.3	319823	N	Y	N	N	N	Y	N	N
NM_178415.1	319845	N	N	N	N	Y	Y	N	N
NM_181316.4	319845	N	N	N	N	Y	Y	N	N
NM_177033.3	319922	N	N	N	N	Y	Y	N	N
NM_177047.3	319974	N	N	N	N	Y	Y	N	N
NM_001277188.1	320091	N	N	N	N	Y	Y	N	N
NR_102339.1	320091	N	N	N	N	Y	N	N	N
NR_015502.1	320092	N	N	N	N	Y	N	N	N
NM_001277239.1	320158	N	N	N	N	Y	N	N	N
NM_177086.4	320158	N	N	N	N	Y	Y	N	N
NM_001081012.1	320226	N	N	N	N	Y	Y	N	N
NR_015593.2	320249	N	N	N	N	Y	N	N	N
NM_182808.3	320265	N	N	N	N	Y	Y	N	N
NR_040624.1	320363	N	N	N	N	Y	N	N	N
NM_001252105.1	320405	N	N	N	N	Y	Y	N	N
NM_001252106.1	320405	N	N	N	N	Y	Y	N	N
NM_001252107.1	320405	N	N	N	N	Y	Y	N	N
NM_001252108.1	320405	N	N	N	N	Y	Y	N	N
NM_001252109.1	320405	N	N	N	N	Y	Y	N	N
NM_001252110.1	320405	N	N	N	N	Y	Y	N	N
NM_153163.4	320405	N	N	N	N	Y	Y	N	N
NM_001081264.1	320438	N	N	N	N	Y	Y	N	N
NM_001310658.1	320460	N	N	N	N	Y	Y	N	N
NM_177164.3	320460	N	N	N	N	Y	Y	N	N
NM_001160369.2	320492	N	N	N	N	Y	Y	N	N
NM_001310451.1	320492	N	N	N	N	Y	Y	N	N
NM_177173.6	320492	N	N	N	N	Y	Y	N	N
NM_177184.3	320528	N	N	N	N	Y	N	N	N
NR_040282.1	320606	N	N	N	N	Y	N	N	N
NM_178786.4	320640	N	N	N	N	N	Y	N	N
NM_001081232.3	320661	N	N	N	N	Y	Y	N	N
NM_177225.4	320679	N	N	N	N	Y	Y	N	N
NM_177230.3	320696	N	N	N	N	Y	Y	N	N
NM_177233.5	320701	N	N	N	N	Y	Y	N	N
NM_001166207.1	320752	N	N	N	N	Y	Y	N	N
NM_177267.4	320808	N	N	N	N	Y	Y	N	N
NM_001002898.1	320832	N	N	N	N	N	Y	N	N
NM_001039094.3	320840	N	N	N	N	Y	Y	N	N
NM_177274.4	320840	N	N	N	N	Y	Y	N	N
NM_177278.5	320858	N	N	N	N	Y	Y	N	N
NM_001081299.1	320865	N	N	N	N	Y	Y	N	N
NM_001316758.1	320873	N	N	N	N	Y	Y	N	N
NM_009865.3	320873	N	N	N	N	Y	Y	N	N
NM_177290.3	320910	N	N	N	N	N	Y	N	N
NM_177292.3	320916	Y	N	N	N	N	N	N	N
NM_001347079.1	320938	N	N	N	N	Y	N	N	N
NM_177304.4	320981	N	N	N	N	Y	Y	N	N
NM_001205341.1	327814	N	N	N	N	Y	Y	N	N
NM_177373.4	327814	N	N	N	N	Y	Y	N	N
NM_177816.3	328381	N	N	N	N	Y	Y	N	N
NM_001085373.1	328949	N	N	N	N	Y	Y	N	N
NM_001085374.1	328949	N	N	N	N	Y	Y	N	N
NM_181422.3	329064	N	N	N	N	Y	Y	N	N
NM_001289497.1	329093	N	N	N	N	N	Y	N	N
NM_177834.4	329093	N	N	N	N	N	Y	N	N
NM_175510.3	329178	N	N	N	N	Y	Y	N	N
NM_001166501.1	329260	N	N	N	N	Y	Y	N	N
NM_181347.3	329260	N	N	N	N	Y	Y	N	N
NM_177845.4	329502	N	N	N	N	Y	Y	N	N
NM_177855.3	329650	N	N	N	N	Y	Y	N	N
NM_001281955.1	329942	N	N	N	N	Y	Y	N	N
NM_001289809.1	330188	N	N	N	N	Y	Y	N	N
NM_001289811.1	330188	N	N	N	N	Y	Y	N	N
NM_183307.4	330188	N	N	N	N	Y	Y	N	N
NM_177879.5	330222	N	N	N	N	Y	N	N	N
NM_001164805.1	330267	N	N	N	N	Y	Y	N	N
NM_001164669.1	330355	N	N	N	N	Y	Y	N	N
NM_001347318.1	330721	N	N	N	N	Y	Y	N	N
NM_177898.4	330721	N	N	N	N	Y	Y	N	N
NR_040770.1	331003	N	N	N	N	Y	N	N	N
NM_177909.5	331004	N	N	N	N	Y	Y	N	N
NM_001168274.1	331063	N	N	N	N	N	Y	N	N
NM_177912.4	331063	N	N	N	N	N	Y	N	N
NM_177914.3	331374	Y	Y	N	N	N	N	N	N
NM_001160403.1	331461	N	N	N	N	Y	Y	N	N
NM_177380.3	337924	N	N	N	N	N	Y	N	N
NM_175275.4	338349	N	N	N	N	Y	Y	N	N
NM_177385.4	338349	N	N	N	N	Y	Y	N	N
NM_001037906.2	338352	N	N	N	N	Y	Y	N	N
NM_177387.3	338362	N	N	N	N	Y	Y	N	N
NM_177393.4	338370	N	N	N	N	Y	Y	N	N
NM_178934.4	353169	N	N	N	N	Y	Y	N	N
NM_198117.2	353234	N	N	N	N	Y	Y	N	N
NM_201243.1	353235	N	N	N	N	Y	Y	N	N
NM_001003671.1	353236	N	N	N	N	Y	Y	N	N
NM_001198808.1	353282	N	N	N	N	Y	Y	N	N
NM_177386.5	353282	N	N	N	N	Y	Y	N	N
NM_183038.2	360214	N	N	N	N	N	Y	N	N
NR_015501.1	373852	N	N	N	N	Y	N	N	N
NR_028313.1	373852	N	N	N	N	Y	N	N	N
NR_028314.1	373852	N	N	N	N	Y	N	N	N
NR_040625.1	378775	N	N	N	N	Y	N	N	N
NM_175515.5	380614	N	Y	N	N	N	N	N	N
NM_001347060.1	380654	N	N	N	N	Y	Y	N	N
NM_001034874.3	380702	N	N	N	N	Y	Y	N	N
NM_173051.2	380839	N	N	N	N	N	Y	N	N
NM_001033276.3	381022	N	N	N	N	Y	Y	N	N
NM_199252.2	381058	N	N	N	N	N	Y	N	N
NM_001008973.2	381107	N	N	N	N	Y	Y	N	N
NM_001289485.1	381107	N	N	N	N	Y	Y	N	N
NM_001289486.1	381107	N	N	N	N	Y	Y	N	N
NM_201361.2	381110	N	N	N	N	Y	Y	N	N
NM_001013770.4	381236	N	N	N	N	Y	Y	N	N
NM_213615.2	381287	N	N	N	N	Y	Y	N	N
NM_001033450.4	381308	Y	N	N	N	N	N	N	N
NM_001301745.1	381308	Y	N	N	N	N	N	N	N
NM_001291189.1	381409	N	N	N	N	Y	Y	N	N
NM_198656.2	381409	N	N	N	N	Y	Y	N	N
NM_198659.2	381476	N	N	N	N	Y	Y	N	N
NM_001081281.1	381485	N	N	N	N	Y	Y	N	N
NR_028428.1	381598	N	N	N	N	N	N	N	Y
NM_198666.3	381714	N	N	N	N	N	N	N	Y
NR_073011.1	381715	N	N	N	N	N	N	N	Y
NM_001200025.1	381716	N	N	N	N	Y	Y	N	N
NM_001033460.3	381738	N	Y	N	N	N	N	N	N
NM_198669.1	381833	N	N	N	N	N	N	Y	N
NM_207658.4	382059	N	N	N	N	N	N	N	Y
NR_045333.1	382139	N	N	N	N	Y	N	N	N
NM_001014395.2	382156	N	N	N	N	Y	Y	N	N
NM_001037716.2	382243	N	N	N	N	Y	N	N	N
NM_001122735.1	382244	N	N	N	N	Y	Y	N	N
NM_001025607.3	382275	N	N	N	N	Y	Y	N	N
NM_001104582.1	383258	N	N	N	N	Y	Y	N	N
NM_026135.1	383348	N	N	N	N	Y	Y	N	N
NM_001104628.1	384221	N	N	N	N	Y	Y	N	N
NM_001033479.4	385263	N	N	N	N	N	Y	N	N
NM_199064.1	385312	N	N	N	N	Y	Y	N	N
NM_199066.2	387131	N	N	N	N	N	Y	N	N
NR_045704.1	402774	N	N	N	N	Y	N	N	N
NM_001101519.1	403185	N	N	N	N	Y	Y	N	N
NM_207534.1	404235	N	N	N	N	N	Y	N	N
NM_207618.2	404288	N	N	N	N	N	N	N	Y
NM_207548.2	404291	N	N	N	N	N	N	N	Y
NM_207673.1	404307	N	N	Y	N	N	N	Y	N
NM_001013411.2	432450	N	N	N	N	Y	Y	N	N
NM_001025286.2	432450	N	N	N	N	Y	Y	N	N
NM_001039555.2	433247	N	N	N	N	Y	Y	N	N
NM_001025574.1	433492	N	N	N	N	N	N	N	Y
NM_001004176.2	433586	N	N	N	N	Y	Y	N	N
NM_001013393.1	433719	N	N	N	N	N	Y	N	N
NM_001324416.1	433801	N	N	N	N	N	Y	N	N
NM_001018019.2	433899	N	N	N	N	Y	Y	N	N
NM_001105074.1	434113	N	N	N	N	N	Y	N	N
NM_001105178.1	434117	N	N	N	N	N	N	N	Y
NM_001101534.1	434121	N	N	N	N	Y	Y	N	N
NM_001033782.3	434172	N	N	N	N	N	Y	N	N
NM_001008427.1	434179	N	N	N	N	N	Y	N	N
NM_001013816.1	434459	N	N	N	N	Y	Y	N	N
NM_001013817.2	434484	N	N	N	N	Y	Y	N	N
NR_033707.1	434555	N	N	N	N	Y	N	N	N
NM_001013820.3	434674	N	N	N	N	Y	Y	N	N
NM_001281526.1	434676	N	N	N	N	N	Y	N	N
NM_001134299.1	434689	N	N	N	N	N	Y	N	N
NM_001104578.1	434701	N	N	N	N	Y	Y	N	N
NM_001114157.1	434758	N	N	N	N	N	Y	N	N
NM_001085356.1	434764	N	N	N	N	Y	Y	N	N
NM_001081642.1	434794	N	N	N	N	Y	Y	N	Y
NM_001081648.1	434864	N	N	N	N	Y	Y	N	N
NM_001114383.1	434865	N	N	N	N	Y	Y	N	Y
NM_001114400.2	434866	N	N	N	N	Y	Y	N	Y
NM_001198987.2	434869	N	N	N	N	Y	N	N	N
NM_001166715.1	435953	N	N	N	N	N	N	N	Y
NR_045151.2	442821	N	N	N	N	Y	N	N	N
NM_001002786.2	442827	N	N	N	N	N	Y	N	N
NM_001004194.2	446099	N	N	N	N	Y	Y	N	N
NM_001005358.2	449000	N	N	N	N	N	N	N	Y
NM_001163919.1	449000	N	N	N	N	N	N	N	Y
NM_001005860.2	474145	N	N	N	N	N	Y	N	N
NM_001007552.1	493583	N	N	N	N	Y	Y	N	N
NM_001033385.3	544696	N	N	N	N	Y	Y	N	N
NM_001270806.1	544990	N	N	N	N	Y	N	N	N
NM_001029930.2	545007	N	N	N	N	Y	Y	N	N
NM_001081402.1	545085	N	N	N	N	Y	Y	N	N
NM_001081257.2	545291	N	N	N	N	Y	Y	N	N
NM_001034899.3	545391	N	N	N	N	N	Y	N	N
NM_001085532.3	545649	N	N	N	N	N	N	N	Y
NM_001098841.3	545651	N	N	N	N	N	N	N	Y
NM_001243166.1	545653	N	N	N	N	N	N	N	Y
NM_001161610.1	545655	N	N	N	N	N	N	N	Y
NM_001310021.1	545728	N	N	N	N	N	N	N	Y
NM_001031622.2	545762	N	N	N	N	N	N	N	Y
NM_207270.2	545902	N	N	N	N	Y	Y	N	N
NM_001105071.1	545909	N	N	N	N	N	N	N	Y
NR_040410.1	546185	N	N	N	N	N	N	N	Y
NM_001100444.2	546272	N	N	N	N	Y	Y	N	N
NM_001081657.1	546282	N	N	N	N	N	N	N	Y
NM_001145406.3	546294	N	N	N	N	N	Y	N	N
NM_001104637.1	546913	N	N	N	N	Y	Y	N	N
NR_033520.1	547127	N	N	N	N	N	N	N	Y
NR_030708.1	547150	N	N	N	N	Y	N	N	N
NM_001034907.2	547176	N	N	N	N	Y	N	N	N
NR_131139.1	547334	N	N	N	N	N	N	Y	N
NM_001025208.1	547349	N	N	N	N	N	Y	N	N
NM_001309398.1	554327	N	N	N	N	N	Y	N	N
NM_001025384.3	574405	N	N	N	N	N	N	N	Y
NM_001045539.2	574438	N	N	N	N	N	N	N	Y
NM_001114754.1	619991	N	N	N	N	N	N	N	Y
NM_001037909.3	620078	N	N	N	N	Y	N	N	N
NM_175219.3	620078	N	N	N	N	Y	N	N	N
NM_001081653.1	620292	N	N	N	N	Y	Y	N	N
NM_001167153.1	620574	N	N	N	N	N	N	N	Y
NM_001166724.1	620758	N	N	N	N	N	N	N	Y
NM_001166725.1	621510	N	N	N	N	N	N	N	Y
NM_001040089.3	621852	N	N	N	N	N	Y	N	Y
NM_001081295.1	622434	N	N	N	N	Y	Y	N	N
NM_001039889.3	622474	N	N	N	N	N	N	N	Y
NM_001310703.1	622486	N	N	N	N	N	N	N	Y
NR_044992.1	622894	N	N	N	N	N	N	N	Y
NM_001277575.1	623197	N	N	N	N	N	N	N	Y
NM_001085538.2	623272	N	N	N	N	N	N	N	Y
NM_001105065.2	624512	N	N	N	N	N	N	N	Y
NR_040750.1	624759	N	N	N	N	Y	N	N	N
NM_011413.2	625018	N	N	N	N	N	Y	N	N
NM_001037717.3	625098	N	N	N	N	Y	Y	N	N
NM_001103366.1	625131	N	N	N	N	N	Y	N	N
NM_001105067.1	625353	N	N	N	N	Y	Y	N	N
NM_001105152.1	625580	N	N	N	N	N	N	N	Y
NR_045362.1	625585	N	N	N	N	Y	N	N	N
NM_001177524.1	625599	N	N	N	N	N	Y	N	N
NM_001105156.1	625605	N	N	N	N	N	N	N	Y
NM_001243016.1	625650	N	N	N	N	N	N	N	Y
NM_001243017.1	625713	N	N	N	N	N	N	N	Y
NR_040748.1	625963	N	N	N	N	Y	N	N	N
NM_001037926.2	626316	N	N	N	N	N	Y	N	N
NM_001039646.2	626578	N	N	N	N	N	Y	N	Y
NM_001243903.1	626802	N	N	N	N	N	Y	N	N
NM_001324422.1	626802	N	N	N	N	N	Y	N	N
NM_001164689.1	626832	N	N	N	N	N	Y	N	N
NM_001177399.1	626848	N	N	N	N	N	Y	N	N
NR_040256.1	626877	N	N	N	N	Y	N	N	N
NM_001111293.1	627081	N	N	N	N	N	N	N	Y
NM_001104541.1	627111	N	N	N	N	N	Y	N	N
NM_001104549.1	627367	N	N	N	N	Y	Y	N	N
NM_001354576.1	627873	N	N	N	N	N	Y	N	N
NM_001100415.1	627914	N	N	N	N	N	N	N	Y
NM_001105055.1	628422	N	N	N	N	Y	Y	N	N
NM_001164329.1	628693	N	N	N	N	N	Y	N	N
NM_001177832.1	628709	N	N	N	N	N	Y	N	N
NM_001177567.1	628870	N	N	N	N	Y	Y	N	N
NM_001310328.1	628991	N	N	N	N	N	N	N	Y
NM_001104648.1	629079	N	N	N	N	Y	Y	N	N
NM_001101586.2	629203	N	N	N	N	Y	Y	N	N
NM_001101588.1	631304	N	N	N	N	Y	Y	N	N
NM_001177513.1	633057	N	N	N	N	N	N	Y	N
NR_033570.1	633093	N	N	N	N	N	N	N	Y
NM_001163288.2	634731	N	N	N	N	Y	Y	N	N
NM_001326288.1	635702	N	N	N	N	Y	Y	N	N
NM_001039696.1	636177	N	N	N	N	N	N	N	Y
NM_001104615.1	637053	N	N	N	N	Y	Y	N	N
NM_001324525.1	637277	N	N	N	N	Y	Y	N	N
NM_001040696.1	637515	N	N	N	N	N	Y	N	N
NM_001162414.1	637515	N	N	N	N	N	Y	N	N
NM_001270644.1	637578	N	N	N	N	N	N	N	Y
NM_001104644.1	637908	N	N	N	N	Y	Y	N	N
NR_033614.1	638988	N	N	N	N	Y	N	N	N
NR_033501.1	639545	N	N	N	N	Y	N	N	N
NM_001100466.1	639774	N	N	N	N	Y	Y	N	N
NM_001145096.1	654498	N	N	N	N	Y	Y	N	N
NR_015562.1	654796	N	N	N	N	Y	N	N	N
NR_015569.3	654804	N	N	N	N	Y	N	N	N
NM_001039698.1	664608	N	N	N	N	N	N	N	Y
NM_001039688.3	664609	N	N	N	N	N	N	N	Y
NM_001039695.1	664610	N	N	N	N	N	N	N	Y
NM_001039944.2	664726	N	N	N	Y	N	N	N	Y
NM_001136476.1	664829	N	N	N	N	Y	Y	N	N
NM_001281527.1	664837	N	N	N	N	N	Y	N	N
NM_001177480.1	665001	N	N	N	N	Y	Y	N	N
NM_001104927.1	665095	N	N	N	N	Y	Y	N	N
NM_001163007.1	665113	N	N	N	N	Y	Y	N	N
NM_001163008.1	665113	N	N	N	N	Y	Y	N	N
NM_001163009.1	665113	N	N	N	N	Y	Y	N	N
NM_026910.1	665113	N	N	N	N	Y	Y	N	N
NM_001166734.1	665150	N	N	N	N	N	N	Y	N
NM_001100109.1	665155	N	N	N	N	N	N	N	Y
NM_001104540.1	665210	N	N	N	N	Y	Y	N	N
NM_001081746.1	665378	N	N	N	N	Y	N	N	N
NM_001177544.2	665433	N	N	N	N	N	N	N	Y
NM_026788.1	665563	N	N	N	N	Y	Y	N	N
NM_001110555.1	665622	N	N	N	N	N	N	N	Y
NM_001313878.1	665622	N	N	N	N	N	N	N	Y
NR_028417.1	665934	N	N	N	N	Y	N	N	N
NM_001177526.1	665956	N	N	N	N	N	N	N	Y
NM_001242937.1	666040	N	N	N	N	N	N	N	Y
NM_001081449.2	666085	N	N	N	N	Y	Y	N	N
NM_177151.3	666173	N	N	N	N	Y	Y	N	N
NM_001198988.1	666184	N	N	N	N	N	N	N	Y
NM_001270457.1	666203	N	N	N	N	N	N	N	Y
NM_174875.3	666468	Y	Y	N	N	Y	N	N	N
NM_001083918.1	666532	N	N	N	N	Y	N	N	N
NM_001177858.1	666731	N	N	N	N	N	N	N	Y
NM_001170884.1	666747	N	N	N	N	N	N	N	Y
NM_001142539.1	667055	N	N	N	N	N	Y	N	Y
NM_001104619.1	667069	N	N	N	N	Y	Y	N	N
NM_001166737.1	667129	N	N	N	N	N	N	N	Y
NM_001104634.1	667180	N	N	N	N	Y	Y	N	N
NM_001114679.1	667214	N	N	N	N	N	N	N	Y
NM_001201358.1	667256	N	N	N	N	N	N	N	Y
NM_001166742.1	667259	N	N	N	N	N	N	N	Y
NM_001166743.1	667262	N	N	N	N	N	N	N	Y
NR_036696.1	667335	N	N	N	N	Y	N	N	N
NM_001166747.1	667404	N	N	N	N	N	N	N	Y
NR_045179.1	667438	N	N	N	N	Y	N	N	N
NM_001166749.1	667464	N	N	N	N	N	N	N	Y
NM_001166750.1	667469	N	N	N	N	N	N	N	Y
NM_001167152.1	667472	N	N	N	N	N	N	N	Y
NM_001166751.1	667485	N	N	N	N	N	N	N	Y
NM_001166752.1	667504	N	N	N	N	N	N	N	Y
NM_001167147.1	667512	N	N	N	N	N	N	N	Y
NM_001167154.1	667543	N	N	N	N	N	N	N	Y
NM_001166755.1	667586	N	N	N	N	N	N	N	Y
NM_001166756.1	667599	N	N	N	N	N	N	N	Y
NM_148413.3	667663	Y	Y	N	N	Y	Y	N	N
[truncated: 284 more rows]

## Sheet: unaligned_seqs
#TranscriptAccession	NCBIGeneID	Assembly
NM_009293.1	20905	GRCm38
NM_133245.1	170812	GRCm38
NM_026939.1	69099	GRCm38
NM_207673.1	404307	GRCm38
NR_002845.1	100044236	GRCm38
NR_024198.2	19785	GRCm38
NR_003280.2	790956	GRCm38
NM_009293.1	20905	Eve2
NM_030740.1	81015	Eve2
NM_134217.1	171251	Eve2
NM_026939.1	69099	Eve2
NM_198669.1	381833	Eve2
NM_207673.1	404307	Eve2
NM_025584.2	673094	Eve2
NM_001099313.2	670482	Eve2
NM_001166843.1	100043103	Eve2
NM_001166734.1	665150	Eve2
NM_001177513.1	633057	Eve2
NR_024198.2	19785	Eve2
NR_051981.1	15016	Eve2
NR_105810.1	102465205	Eve2
NR_110482.1	216377	Eve2
NR_131139.1	547334	Eve2

## Sheet: low_cds_cov
#TranscriptAccession	NCBIGeneID	Assembly	ScaffoldAccession	Start	End	Strand	% identity	% coverage
NM_008848.1	18729	GRCm38	NT_187034.1	1274189	1282928	+	98.63	93.14
NM_007846.1	13221	GRCm38	NT_039457.8	514626	514797	-	90.69	61.64
NM_007847.1	13222	GRCm38	NT_039457.8	131519	283917	-	84.22	92.35
NM_011093.1	18729	GRCm38	NT_187034.1	1274143	1282645	+	98.37	87.05
NM_010846.1	17857	GRCm38	NT_039625.8	32152449	32168317	-	99.21	86.88
NM_031367.1	15061	GRCm38	NT_039240.8	100945012	100949166	-	98.61	57.16
NM_053251.1	114600	GRCm38	NT_039353.8	101558234	101561324	-	96.63	94.64
NM_145549.1	230500	GRCm38	NT_039264.7	10482701	10565986	+	99.56	87.15
NM_016879.2	53622	GRCm38	NT_039621.8	62633238	62647821	-	95.4	63.72
NM_010381.2	100504404	GRCm38	NT_039649.8	20687600	20690033	-	99.48	88.27
NM_144848.2	223650	GRCm38	NT_039621.8	37219038	37237745	-	99.98	57.07
NM_207683.2	18705	GRCm38	NT_039360.8	2948	256373	+	99.47	70.03
NM_207683.2	18705	GRCm38	NT_039353.8	108811261	108854424	+	99.44	25.63
NM_207243.2	239611	GRCm38	NT_039621.8	52955876	53052105	+	99.89	39.93
NM_053270.1	116837	GRCm38	NT_039169.8	19288422	19432843	-	99.81	49.84
NM_053270.1	116837	GRCm38	NT_039170.8	1681	339214	-	99.94	42.73
NM_183018.2	116837	GRCm38	NT_039169.8	19288422	19432843	-	99.8	48.86
NM_183018.2	116837	GRCm38	NT_039170.8	1681	339214	-	99.94	43.57
NM_001012624.1	116837	GRCm38	NT_039169.8	19288422	19432843	-	99.72	45.64
NM_001012624.1	116837	GRCm38	NT_039170.8	1681	339214	-	99.94	46.31
NM_001012623.1	116837	GRCm38	NT_039169.8	19288422	19432843	-	99.73	46.59
NM_001012623.1	116837	GRCm38	NT_039170.8	1681	339214	-	99.94	45.5
NM_001012625.1	116837	GRCm38	NT_039169.8	19288422	19432843	-	99.76	43.51
NM_001012625.1	116837	GRCm38	NT_039170.8	1681	339214	-	99.94	48.12
NM_174875.3	666468	GRCm38	NT_039718.8	9171	14742	+	98.69	62.5
NM_174875.3	666468	GRCm38	NT_039716.8	15127170	15165694	+	100	35.21
NM_013557.2	15467	GRCm38	NT_039324.8	291	31146	+	100	92.24
NM_025584.2	673094	GRCm38	NT_187055.1	48	1475	-	95.37	22.21
NM_008710.3	18115	GRCm38	NT_039590.8	27314271	27388965	-	99.13	86.06
NM_010400.2	15101	GRCm38	NT_039492.8	14706458	14889070	+	82.26	50.24
NM_177010.3	319823	GRCm38	NT_039624.8	41788746	41841950	+	90.06	85.35
NM_144531.3	71529	GRCm38	NT_187033.1	11586081	11699149	-	99.82	92.62
NM_001109684.1	71529	GRCm38	NT_187033.1	11622931	11699149	-	99.76	90.56
NM_134420.4	171429	GRCm38	NT_039477.8	7761990	7770090	+	100	81.85
NM_134420.4	171429	GRCm38	NT_039482.8	267	906	+	100	12.61
NM_175006.2	218030	GRCm38	NT_039578.8	7043886	7300970	-	99.9	88.05
NM_027211.2	69787	GRCm38	NT_039621.8	19459014	19506824	-	99.82	82.81
NM_029342.4	75570	GRCm38	NT_039170.8	52500836	52580143	-	99.41	61.2
NM_001033460.3	381738	GRCm38	NT_039305.8	1992	27037	+	99.95	91.18
NM_001005418.1	13223	GRCm38	NT_039457.8	475231	475431	+	91.04	59.82
NM_177914.3	331374	GRCm38	NT_039700.8	41516	116395	+	100	95.4
NM_177914.3	331374	GRCm38	NT_039699.8	3729306	3729636	+	100	4.61
NM_011154.2	19054	GRCm38	NT_166313.2	225510	228026	-	100	60.66
NM_001163415.1	19054	GRCm38	NT_166313.2	225510	228026	-	100	57.42
NM_009027.3	19418	GRCm38	NT_039589.8	37522890	37630525	-	100	76.93
NM_009027.3	19418	GRCm38	NT_039590.8	2743	111448	-	100	18.32
NM_001013813.3	270118	GRCm38	NT_039472.8	205686	295230	+	100	90.79
NM_001013813.3	270118	GRCm38	NT_039471.8	10297958	10298561	+	99.83	9.22
NM_148413.3	667663	GRCm38	NT_039202.8	19177503	19373420	+	99.04	51.43
NM_148413.3	667663	GRCm38	NT_039206.8	681	76520	+	100	49.46
NM_027700.1	71159	GRCm38	NT_111910.3	1406	4336	-	98.69	60.38
NM_023566.3	17831	GRCm38	NT_039437.8	1	10083	+	100	39.72
NM_023566.3	17831	GRCm38	NT_166306.2	2628081	2642070	+	99.84	51.77
NM_033374.3	94176	GRCm38	NT_096135.6	670	102285	-	99.7	37
NM_033374.3	94176	GRCm38	NT_039515.7	31126815	31414545	-	99.97	63.54
NM_080640.5	118452	GRCm38	NT_039621.8	51459	70467	+	100	94.99
NM_009838.2	12466	GRCm38	NT_039313.8	5077598	5084742	+	99.92	56.31
NM_009838.2	12466	GRCm38	NT_039314.8	252	1733	+	99.31	38.21
NM_007845.3	13219	GRCm38	NT_039457.8	475247	475431	+	90.27	50.13
NM_011596.5	21871	GRCm38	NT_039313.8	2444	14697	+	99.85	78.42
NM_011596.5	21871	GRCm38	NT_078458.7	11093078	11110842	+	100	21.65
NM_011633.2	22033	GRCm38	NT_039189.8	8493272	8496037	-	100	43.39
NM_011633.2	22033	GRCm38	NT_039190.8	912	40823	-	99.22	51.8
NM_017478.3	54160	GRCm38	NT_039353.8	6748	93983	-	100	55.92
NM_017478.3	54160	GRCm38	NT_039340.7	27697554	27700638	-	100	44.14
NM_028708.2	74004	GRCm38	NT_166306.2	348	21717	+	100	56.68
NM_028708.2	74004	GRCm38	NT_039433.8	56689407	56780627	+	100	36.41
NM_001100451.2	77853	GRCm38	NT_039477.8	8517	12747	+	100	86.54
NM_001100451.2	77853	GRCm38	NT_039474.8	47343153	47343812	+	100	13.47
NM_053122.4	93757	GRCm38	NT_039548.8	38024090	38133662	+	98.78	35.08
NM_053122.4	93757	GRCm38	NT_039551.8	54965	381789	+	99.87	67.74
NM_198024.2	223332	GRCm38	NT_039617.8	5917949	5961992	+	100	24.98
NM_198024.2	223332	GRCm38	NT_039618.8	901	12557	+	99.96	71.43
NM_175515.5	380614	GRCm38	NT_039229.7	3085	54157	+	99.98	96.25
NM_001289428.1	18729	GRCm38	NT_187034.1	1274124	1284827	+	99.06	58.82
NM_178633.3	77113	GRCm38	NT_039460.8	25586885	25640362	-	99.7	82.22
NM_178633.3	77113	GRCm38	NT_039462.8	7957	46203	-	100	19.55
NM_010039.2	13238	GRCm38	NT_039457.8	419889	420055	-	94.61	44.89
NM_001004145.3	235779	GRCm38	NT_166313.2	99995	105655	+	100	83.76
NM_001346422.1	235779	GRCm38	NT_166313.2	99999	108138	+	99.8	56.39
NM_001033256.4	214616	GRCm38	NT_039207.8	63509984	63515837	+	99.92	57.3
NM_009268.1	20771	Eve2	LXEJ02003318	65015	68590	-	97.96	94.79
NM_008848.1	18729	Eve2	LXEJ02001199	883250	891988	-	98.63	93.14
NM_007846.1	13221	Eve2	LXEJ02009658	8041	8212	-	90.69	61.64
NM_007847.1	13222	Eve2	LXEJ02010882	8200	8411	-	91.5	43.8
NM_011093.1	18729	Eve2	LXEJ02001199	883533	892034	-	98.37	87.05
NM_010846.1	17857	Eve2	LXEJ02004857	1542425	1558292	-	99.21	86.88
NM_010816.1	17450	Eve2	LXEJ02009388	28431	100955	-	100	53.08
NM_010816.1	17450	Eve2	LXEJ02000209	3347567	3396281	+	100	30.03
NM_010816.1	17450	Eve2	LXEJ02007654	25475	45395	-	99.62	17.6
NM_018830.1	54447	Eve2	LXEJ02006267	10869	51147	+	99.97	73.99
NM_018830.1	54447	Eve2	LXEJ02007966	4658	64322	-	99.52	26.3
NM_018779.1	54611	Eve2	LXEJ02007216	13761	139018	+	99.43	71.7
NM_018779.1	54611	Eve2	LXEJ02004297	110991	112277	-	99.61	30.55
NM_019515.1	56183	Eve2	LXEJ02011386	1457	26372	+	100	72.94
NM_019515.1	56183	Eve2	LXEJ02006497	142001	147425	+	100	34.05
NM_031367.1	15061	Eve2	LXEJ02004180	570311	574465	+	98.61	57.16
NM_053251.1	114600	Eve2	LXEJ02005856	52645	55735	-	96.63	94.64
NM_054072.1	116731	Eve2	LXEJ02008908	410900	442400	-	100	54.49
NM_054072.1	116731	Eve2	LXEJ02011707	30042	50929	-	99.03	47.33
NM_080470.1	140557	Eve2	LXEJ02004897	1180570	1226427	+	100	73.44
NM_080470.1	140557	Eve2	LXEJ02003640	1868461	1882628	-	98.33	28.19
NM_130880.1	170711	Eve2	LXEJ02007638	2027569	2059199	-	100	72.84
NM_130880.1	170711	Eve2	LXEJ02010345	44082	296517	+	100	27.21
NM_024470.1	79410	Eve2	LXEJ02003168	18264	25910	-	98.43	27.17
NM_134072.1	105387	Eve2	LXEJ02000133	7515	18883	+	99.74	80.04
NM_134072.1	105387	Eve2	LXEJ02009447	871531	877381	+	100	16.67
NM_134256.1	171405	Eve2	LXEJ02009796	9832	26952	-	100	40.41
NM_134256.1	171405	Eve2	LXEJ02009990	24396	56898	-	99.03	57.29
NM_009959.1	12941	Eve2	LXEJ02008908	410900	442400	-	100	54.93
NM_009959.1	12941	Eve2	LXEJ02011707	14395	20774	-	99.74	45.65
NM_138758.1	192289	Eve2	LXEJ02003837	23479	36676	+	99.64	61.61
NM_138758.1	192289	Eve2	LXEJ02000954	11969	39229	+	99.82	25.61
NM_029597.1	76405	Eve2	LXEJ02006114	1	4697	+	100	52.5
NM_029597.1	76405	Eve2	LXEJ02003280	1636870	1638958	+	100	39.16
NM_009961.1	12943	Eve2	LXEJ02008908	410900	442400	-	100	54.55
NM_009961.1	12943	Eve2	LXEJ02005945	24311	26711	-	99.54	45.74
NM_138662.1	192163	Eve2	LXEJ02011707	32638	35007	-	100	45.31
NM_138662.1	192163	Eve2	LXEJ02008908	410900	442413	-	99.75	54.93
NM_138661.1	192161	Eve2	LXEJ02008908	410900	442402	-	100	53.58
NM_138661.1	192161	Eve2	LXEJ02005945	31671	34151	-	100	46.45
NM_144839.1	218793	Eve2	LXEJ02007356	151315	208162	+	100	79.91
NM_144839.1	218793	Eve2	LXEJ02007172	91696	113830	-	100	19.71
NM_152915.1	227325	Eve2	LXEJ02000119	3389	4428	+	100	28.63
NM_152915.1	227325	Eve2	LXEJ02008442	3912	119709	-	98.98	37.33
NM_152915.1	227325	Eve2	LXEJ02008062	12580	74465	+	96.28	24.45
NM_152915.1	227325	Eve2	LXEJ02002978	18110	93357	-	95.29	14.3
NM_153417.1	225997	Eve2	LXEJ02011268	2552	98799	+	100	82.25
NM_153417.1	225997	Eve2	LXEJ02000003	3358636	3410853	+	99.93	23.31
NM_009957.1	12939	Eve2	LXEJ02008908	410900	442402	-	99.96	54.88
NM_009957.1	12939	Eve2	LXEJ02011707	4936	7290	-	100	45.15
NM_009960.1	12942	Eve2	LXEJ02008908	410900	442403	-	100	54.49
NM_009960.1	12942	Eve2	LXEJ02005945	18780	21173	-	100	45.56
NM_026254.2	67581	Eve2	LXEJ02008991	5610	35714	+	99.96	80.91
NM_026254.2	67581	Eve2	LXEJ02005113	355233	378495	+	99.85	19.15
NM_023186.3	81600	Eve2	LXEJ02011473	360	15976	-	99.89	58.89
NM_028295.1	72599	Eve2	LXEJ02012166	503914	544756	-	100	64.4
NM_028295.1	72599	Eve2	LXEJ02004508	155365	196836	+	100	35.38
NM_138663.2	192164	Eve2	LXEJ02008908	410900	442400	-	100	54.43
NM_138663.2	192164	Eve2	LXEJ02005945	9408	11801	-	100	45.56
NM_177748.2	245615	Eve2	LXEJ02004347	14957	24649	-	100	95.73
NM_019667.2	56324	Eve2	LXEJ02006532	2668570	2671303	-	100	66.29
NM_019667.2	56324	Eve2	LXEJ02001198	2649	44664	-	100	33.75
NM_028231.2	72413	Eve2	LXEJ02006635	1669	23019	-	100	84.78
NM_028231.2	72413	Eve2	LXEJ02000538	5784	259224	-	98.9	15.4
NM_019971.2	54635	Eve2	LXEJ02011351	36987	142768	+	99.91	68.36
NM_019971.2	54635	Eve2	LXEJ02003275	289445	290586	+	99.91	32.51
NM_010031.2	13216	Eve2	LXEJ02011560	20731	20934	+	94.11	48.57
NM_010031.2	13216	Eve2	LXEJ02009658	8046	8250	-	89.47	48
NM_010941.3	18194	Eve2	LXEJ02012609	118036	127402	-	100	79.89
NM_010941.3	18194	Eve2	LXEJ02009335	176024	187297	+	98.91	20.78
NM_130457.2	170571	Eve2	LXEJ02010620	8499	49500	+	100	49.21
NM_130457.2	170571	Eve2	LXEJ02009553	15103	136076	+	99.94	34.73
NM_130457.2	170571	Eve2	LXEJ02010926	6204	18761	+	100	9.95
NM_130457.2	170571	Eve2	LXEJ02012472	79038	125504	+	99.66	6.1
NM_010381.2	100504404	Eve2	LXEJ02005075	466442	468875	-	99.48	88.27
NM_009065.2	19762	Eve2	LXEJ02005137	1008956	1277802	-	100	84.01
NM_009065.2	19762	Eve2	LXEJ02006233	37497	48505	+	99.66	16.15
NM_183024.1	242570	Eve2	LXEJ02008852	3100339	3122812	-	99.79	72.03
NM_183024.1	242570	Eve2	LXEJ02001580	39666	101961	+	99.91	30.7
NM_178358.3	237091	Eve2	LXEJ02001653	24601	25569	+	100	54.62
NM_178358.3	237091	Eve2	LXEJ02001031	365061	396764	+	99.4	46.25
NM_026184.2	67475	Eve2	LXEJ02001750	53174	71922	-	98.92	83.13
NM_026184.2	67475	Eve2	LXEJ02000840	2111573	2136719	+	100	20.39
NM_198620.1	242819	Eve2	LXEJ02007650	101340	139776	-	100	73.6
NM_198620.1	242819	Eve2	LXEJ02009901	19332	94042	+	99.89	26.24
NM_030014.2	77963	Eve2	LXEJ02002541	8535	43174	+	100	93.77
NM_030014.2	77963	Eve2	LXEJ02012358	1796103	1803203	+	99.26	6.37
NM_027193.2	69740	Eve2	LXEJ02005105	2441286	2445405	-	100	61.46
NM_027193.2	69740	Eve2	LXEJ02011071	3008	30090	-	99.83	37.88
NM_199446.1	102093	Eve2	LXEJ02005760	3073	92804	+	99.96	67.57
NM_199446.1	102093	Eve2	LXEJ02012001	668908	729857	-	100	15.75
NM_199446.1	102093	Eve2	LXEJ02001228	4851	31529	-	98.61	13.9
NM_145476.2	223754	Eve2	LXEJ02004937	425238	611995	-	100	68.68
NM_145476.2	223754	Eve2	LXEJ02004897	209	97551	-	99.91	34.69
NM_011625.1	21981	Eve2	LXEJ02005049	1122887	1140859	-	100	87.58
NM_011625.1	21981	Eve2	LXEJ02008195	147642	197483	+	100	12.42
NM_207534.1	404235	Eve2	LXEJ02008376	95947	96381	-	92.87	50.34
NM_207649.1	53901	Eve2	LXEJ02006731	1063836	1093912	-	99.72	87.12
NM_207683.2	18705	Eve2	LXEJ02005671	3106	256504	+	99.41	70.13
NM_207683.2	18705	Eve2	LXEJ02004495	200685	254833	+	99.46	26.58
NM_001001178.1	227933	Eve2	LXEJ02004702	50651	58826	+	99.95	57.81
NM_001001178.1	227933	Eve2	LXEJ02006919	1911946	2397254	+	96.39	51.06
NM_207243.2	239611	Eve2	LXEJ02007991	1943994	2045596	+	99.95	63.53
NM_172987.2	269513	Eve2	LXEJ02009818	72109	111315	+	100	78.44
NM_172987.2	269513	Eve2	LXEJ02001194	24455	24861	+	100	14
NM_173755.3	217342	Eve2	LXEJ02004893	1506811	1518150	-	100	91.6
NM_001002898.1	320832	Eve2	LXEJ02007360	1999	18012	-	100	88.06
NM_201243.1	353235	Eve2	LXEJ02008908	410900	442402	-	100	54.59
NM_201243.1	353235	Eve2	LXEJ02005945	37183	39564	-	100	45.44
NM_001003671.1	353236	Eve2	LXEJ02008908	410900	442400	-	100	54
NM_001003671.1	353236	Eve2	LXEJ02006739	183378	196328	-	99.95	46.2
NM_199064.1	385312	Eve2	LXEJ02011045	29001	33038	-	100	42.53
NM_199064.1	385312	Eve2	LXEJ02003055	44027	49345	+	95.53	66.36
NM_194058.2	243874	Eve2	LXEJ02005470	1233453	1275024	+	100	89.47
NM_194058.2	243874	Eve2	LXEJ02002173	22447	22798	-	100	10.52
NM_001004761.1	241263	Eve2	LXEJ02002009	11253	58766	-	100	69.2
NM_001004761.1	241263	Eve2	LXEJ02001910	118881	120472	-	100	22.28
NM_001004761.1	241263	Eve2	LXEJ02003868	55959	86972	+	97.78	4.98
NM_148926.2	21769	Eve2	LXEJ02004931	2965288	2982743	-	100	82.95
NM_148926.2	21769	Eve2	LXEJ02005269	657810	788531	+	100	16.74
NM_001005787.1	12695	Eve2	LXEJ02008866	7784	46424	+	100	68.52
NM_001005787.1	12695	Eve2	LXEJ02007416	299	94634	-	99.35	31.95
NM_172696.2	12695	Eve2	LXEJ02006180	9075	136716	-	100	49.89
NM_172696.2	12695	Eve2	LXEJ02008866	7784	61535	+	99.45	17.56
NM_172696.2	12695	Eve2	LXEJ02007416	299	117876	-	99.17	11.62
NM_007704.2	12695	Eve2	LXEJ02008866	7784	61535	+	99.45	33.28
NM_007704.2	12695	Eve2	LXEJ02007416	299	94634	-	99.35	24.02
NM_001007552.1	493583	Eve2	LXEJ02005087	330537	336691	+	95.45	75.61
NM_001007552.1	493583	Eve2	LXEJ02005061	847	1117	+	91.2	23.93
NM_001008427.1	434179	Eve2	LXEJ02000464	19055	19679	-	99.68	19.87
NM_001011707.1	69888	Eve2	LXEJ02007541	5899	29336	+	100	68.71
NM_001011736.1	257881	Eve2	LXEJ02004441	34507	34747	-	95	23.31
NM_021545.1	53880	Eve2	LXEJ02005743	11007	33952	+	99.52	78.49
NM_177816.3	328381	Eve2	LXEJ02009325	1996	28718	+	100	50.61
NM_177816.3	328381	Eve2	LXEJ02011072	347410	379781	+	100	49.38
NM_001013393.1	433719	Eve2	LXEJ02003710	4	3698	-	99.48	73.84
NM_001013816.1	434459	Eve2	LXEJ02001998	177	7129	+	99.45	70.08
NM_001013816.1	434459	Eve2	LXEJ02010795	13677	17051	+	100	21.81
NM_175353.2	107371	Eve2	LXEJ02004466	6725	68346	-	99.65	74.27
NM_175353.2	107371	Eve2	LXEJ02005271	4613	68361	+	96.78	31.6
NM_007958.1	13990	Eve2	LXEJ02002262	64299	75609	-	99.95	46.44
NM_007958.1	13990	Eve2	LXEJ02006875	59654	116408	+	99.31	54.59
NM_001017427.1	242505	Eve2	LXEJ02005445	4088	39471	+	99.86	86.26
NM_001017427.1	242505	Eve2	LXEJ02004140	13402	44312	+	99.86	13.96
NM_053105.2	93688	Eve2	LXEJ02000983	49489	97135	-	99.59	42.31
NM_053105.2	93688	Eve2	LXEJ02009809	5606224	5607451	-	99.83	30.04
NM_053105.2	93688	Eve2	LXEJ02009649	7166	86164	-	99.52	15.46
NM_053105.2	93688	Eve2	LXEJ02007395	19192	89256	-	96.51	15.21
NM_175013.2	226041	Eve2	LXEJ02008383	727551	873727	-	100	94.04
NM_175013.2	226041	Eve2	LXEJ02003051	5021	32120	-	100	6
NM_001025208.1	547349	Eve2	LXEJ02004217	14541	15847	-	93.69	49.36
NM_146139.2	57257	Eve2	LXEJ02001769	1659753	1717417	+	100	94.47
NM_020505.2	57257	Eve2	LXEJ02001769	1363056	1717417	+	99.5	72.55
NM_020505.2	57257	Eve2	LXEJ02006200	35917	119510	-	99.93	29.12
NM_177164.3	320460	Eve2	LXEJ02000934	3463	6794	+	100	71.57
NM_177164.3	320460	Eve2	LXEJ02010625	753190	807571	+	99.26	29.34
NM_008434.2	16535	Eve2	LXEJ02001596	7756	252060	+	100	80.88
NM_008434.2	16535	Eve2	LXEJ02008339	323972	368770	+	98.84	19.88
NM_001025581.1	268345	Eve2	LXEJ02003724	41734	52429	-	99.98	87.68
NM_001025581.1	268345	Eve2	LXEJ02002159	103184	109909	+	97.54	13.7
NM_033605.2	93837	Eve2	LXEJ02001516	32307	163984	+	100	68.08
NM_033605.2	93837	Eve2	LXEJ02002156	20636	21315	+	100	22.56
NM_026189.3	67484	Eve2	LXEJ02001151	55529	168686	+	100	73.37
NM_026189.3	67484	Eve2	LXEJ02006612	96065	96769	+	100	26.37
NM_029851.2	110350	Eve2	LXEJ02008330	117763	368157	+	99.73	93.23
NM_029851.2	110350	Eve2	LXEJ02007575	222	16024	-	96.88	7.85
NM_174875.3	666468	Eve2	LXEJ02007435	1005357	1053053	+	99.87	35.72
NM_174875.3	666468	Eve2	LXEJ02009875	4603	10174	+	98.69	62.5
NM_010305.1	14677	Eve2	LXEJ02001757	177853	280855	+	99.79	91.85
NM_010305.1	14677	Eve2	LXEJ02009331	10910	13006	+	100	8.98
NM_011088.1	18724	Eve2	LXEJ02005455	16722	20798	+	98.49	88.48
NM_028372.1	72852	Eve2	LXEJ02004993	30031	33346	+	99.96	85.41
NM_028372.1	72852	Eve2	LXEJ02008297	5451	6024	-	99.47	14.79
NM_173030.2	271786	Eve2	LXEJ02003936	78466	161836	-	99.46	78.13
NM_173030.2	271786	Eve2	LXEJ02002550	9599	35169	-	100	9.53
NM_173030.2	271786	Eve2	LXEJ02003449	369502	450085	+	99.7	9.66
NM_011668.2	22215	Eve2	LXEJ02003827	9213	69005	-	100	58.09
NM_011668.2	22215	Eve2	LXEJ02003850	5354	8427	+	99.8	40.72
NM_001033962.1	22215	Eve2	LXEJ02003827	9213	69005	-	100	56.49
NM_001033962.1	22215	Eve2	LXEJ02003850	5354	8427	+	99.8	42.28
NM_019776.2	56463	Eve2	LXEJ02010503	18897	239161	+	99.95	58.12
NM_019776.2	56463	Eve2	LXEJ02001764	294410	448411	+	98.87	43.3
NM_001035242.1	226025	Eve2	LXEJ02007289	17754	150953	+	100	80.91
NM_001035242.1	226025	Eve2	LXEJ02003732	53159	149184	+	99.9	16.37
NM_001035244.1	226025	Eve2	LXEJ02007289	17754	87574	+	100	61.59
NM_001035244.1	226025	Eve2	LXEJ02003732	48359	149184	+	100	38.4
NM_001037321.1	207215	Eve2	LXEJ02003293	6203	6591	-	100	15.44
NM_001037321.1	207215	Eve2	LXEJ02002835	2396190	2404249	-	99.33	71.88
NM_001037321.1	207215	Eve2	LXEJ02005025	1	2966	+	100	16.87
NM_001037865.1	213945	Eve2	LXEJ02001763	304059	457402	-	99.65	54.65
NM_001037865.1	213945	Eve2	LXEJ02008047	7952	33035	+	99.84	46.57
NM_001038619.1	103967	Eve2	LXEJ02008027	46853	79545	+	100	72.07
NM_001038619.1	103967	Eve2	LXEJ02012492	6324	53619	-	100	12.74
NM_001038619.1	103967	Eve2	LXEJ02010606	11427	136021	+	99.75	10.63
NM_010316.3	14704	Eve2	LXEJ02006816	114529	115768	-	99.91	72.98
NM_010316.3	14704	Eve2	LXEJ02005280	3	1076	-	100	26.78
NM_019634.2	21912	Eve2	LXEJ02006540	49715	67003	+	100	93.06
NM_001039195.1	14800	Eve2	LXEJ02001537	2421	52125	+	99.96	81.78
NM_001039195.1	14800	Eve2	LXEJ02003275	54685	55831	-	100	18.21
NM_013540.2	14800	Eve2	LXEJ02001537	2421	58681	+	99.98	90.7
NM_013540.2	14800	Eve2	LXEJ02003275	54685	55831	-	100	9.29
NM_177845.4	329502	Eve2	LXEJ02004927	15283	49164	+	99.89	85.81
NM_177845.4	329502	Eve2	LXEJ02004926	297019	297669	+	100	14.54
NM_177406.3	277753	Eve2	LXEJ02006542	3845	10488	-	99.67	76.54
NM_177406.3	277753	Eve2	LXEJ02000445	95951	98944	+	100	24.23
NM_172306.2	13118	Eve2	LXEJ02004115	104466	111059	-	100	76.53
NM_172306.2	13118	Eve2	LXEJ02010214	13066	16040	-	100	23.54
NM_027830.2	71567	Eve2	LXEJ02008340	804767	830899	-	100	58.3
NM_027830.2	71567	Eve2	LXEJ02006612	34372	53511	-	100	41.82
NM_007592.3	12319	Eve2	LXEJ02001200	6137	54032	+	99.96	91.2
NM_007592.3	12319	Eve2	LXEJ02010267	21095	50085	+	97.74	10.06
NM_024450.2	30049	Eve2	LXEJ02000533	1452605	1462396	-	99.96	84.32
NM_007936.3	13838	Eve2	LXEJ02002729	42568	120393	+	100	86.12
NM_007936.3	13838	Eve2	LXEJ02005040	7189	27931	-	98.07	15.48
NM_001039534.1	214580	Eve2	LXEJ02012132	844	4768	+	98.52	35.57
NM_001039534.1	214580	Eve2	LXEJ02004976	1661127	1664310	+	95.78	69.64
NM_026331.3	67712	Eve2	LXEJ02010241	15455	23235	+	99.92	91.27
NM_026331.3	67712	Eve2	LXEJ02005478	33083	33454	-	100	8.93
NM_011158.3	19088	Eve2	LXEJ02005090	428679	464088	+	99.96	84.18
NM_011158.3	19088	Eve2	LXEJ02000792	115778	138456	+	98.03	16.4
NM_013454.3	11303	Eve2	LXEJ02011544	1721	102432	-	99.96	49
NM_013454.3	11303	Eve2	LXEJ02012046	67026	87331	-	99.79	51.29
NM_001039965.1	66869	Eve2	LXEJ02011024	22760	31148	-	84.75	49.71
NM_001039967.1	66869	Eve2	LXEJ02011024	22760	31148	-	84.75	48.09
NM_181274.3	66869	Eve2	LXEJ02011024	22760	31150	-	84.77	48.74
NM_153820.3	76117	Eve2	LXEJ02002603	225647	290590	-	100	53.92
NM_153820.3	76117	Eve2	LXEJ02004101	24467	417950	-	100	37.88
NM_009246.3	20703	Eve2	LXEJ02007472	1	4338	+	99.5	84.32
NM_001035239.2	226025	Eve2	LXEJ02007289	17754	150953	+	100	81.01
NM_001035239.2	226025	Eve2	LXEJ02003732	53159	149184	+	99.9	16.28
NM_001035240.2	226025	Eve2	LXEJ02007289	17754	150953	+	100	81.01
NM_001035240.2	226025	Eve2	LXEJ02003732	53159	149184	+	99.9	16.28
NM_001035241.2	226025	Eve2	LXEJ02007289	17754	150953	+	100	80.92
NM_001035241.2	226025	Eve2	LXEJ02003732	53159	149184	+	99.9	16.35
NM_001035243.2	226025	Eve2	LXEJ02007289	17754	150953	+	100	80.82
NM_001035243.2	226025	Eve2	LXEJ02003732	53159	149184	+	99.9	16.44
NM_009888.3	12628	Eve2	LXEJ02004450	5215	39411	+	100	65.06
NM_009888.3	12628	Eve2	LXEJ02004738	4527	69360	-	99.26	43.66
NM_001042558.1	11783	Eve2	LXEJ02007087	4847	39378	+	100	52.2
NM_001042558.1	11783	Eve2	LXEJ02012539	175494	228927	+	99.34	49.03
NM_009684.2	11783	Eve2	LXEJ02007087	4847	39378	+	100	52.54
NM_009684.2	11783	Eve2	LXEJ02012539	175494	228927	+	99.33	48.69
NM_007439.2	11682	Eve2	LXEJ02007442	483674	995107	-	100	78.38
NM_007439.2	11682	Eve2	LXEJ02002458	165097	166397	-	99.46	21.93
NM_028938.2	74435	Eve2	LXEJ02002134	114364	144730	-	100	58.22
NM_028938.2	74435	Eve2	LXEJ02001189	448308	484377	+	99.82	41.96
NM_009399.3	21934	Eve2	LXEJ02003804	263989	267461	-	99.79	69.11
NM_009399.3	21934	Eve2	LXEJ02009299	772747	819756	+	100	31.08
NM_177387.3	338362	Eve2	LXEJ02006705	59700	103141	-	99.81	74.25
NM_177387.3	338362	Eve2	LXEJ02000796	90947	112453	+	98.01	17.46
NM_026072.1	67285	Eve2	LXEJ02001093	81630	122080	+	99.91	62.15
NM_026072.1	67285	Eve2	LXEJ02009292	955008	1067488	-	96.23	47.5
NM_001040696.1	637515	Eve2	LXEJ02005528	126262	140501	+	100	48.42
NM_018818.2	12662	Eve2	LXEJ02008730	13715	59886	+	100	6.98
NM_018818.2	12662	Eve2	LXEJ02011233	2439	6050	+	91.87	72.94
NM_175549.4	268902	Eve2	LXEJ02009105	157247	321915	-	100	95.17
NM_175549.4	268902	Eve2	LXEJ02002991	141608	141955	-	97.98	4.31
NM_001034013.2	11418	Eve2	LXEJ02004833	461087	552461	+	100	70.97
NM_001034013.2	11418	Eve2	LXEJ02010489	154439	155213	+	99.74	29.32
NM_175331.3	103466	Eve2	LXEJ02003808	889	34495	+	99.98	94.84
NM_175331.3	103466	Eve2	LXEJ02002348	19585	19891	-	100	5.14
NM_010748.2	17101	Eve2	LXEJ02000840	3143786	3266237	+	100	80.09
NM_010748.2	17101	Eve2	LXEJ02006756	105542	125671	-	100	9.35
NM_010748.2	17101	Eve2	LXEJ02012596	9911	36244	+	99.68	10.69
NM_008729.2	18163	Eve2	LXEJ02006305	48976	57620	-	100	33.78
NM_008729.2	18163	Eve2	LXEJ02002906	25903	223669	-	100	25.77
NM_008729.2	18163	Eve2	LXEJ02003815	43555	44136	-	99.31	9.76
NM_008729.2	18163	Eve2	LXEJ02000574	34965	123097	+	98.18	24.83
NM_009489.2	22305	Eve2	LXEJ02000094	7010	19872	-	99.67	80.31
NM_183038.2	360214	Eve2	LXEJ02003846	7715	7775	-	100	24.2
NM_010230.2	14260	Eve2	LXEJ02012030	1	191137	+	100	75.63
NM_010230.2	14260	Eve2	LXEJ02008334	2623	200812	-	99.93	27.18
NM_029148.1	52837	Eve2	LXEJ02000708	5791	24085	+	99.78	89.64
NM_029148.1	52837	Eve2	LXEJ02003690	15975	39538	+	100	11.08
NM_177690.3	232827	Eve2	LXEJ02008687	7377	40935	-	100	80.52
NM_177690.3	232827	Eve2	LXEJ02012078	24095	34356	-	100	19.5
NM_011348.2	20349	Eve2	LXEJ02005629	5531	53794	+	99.81	84.65
NM_011348.2	20349	Eve2	LXEJ02008907	9301	148870	-	99.2	16.35
NM_025822.3	66880	Eve2	LXEJ02001221	52354	60850	-	100	75.64
NM_025822.3	66880	Eve2	LXEJ02002319	1463966	1561248	-	98.46	19.89
NM_001008973.2	381107	Eve2	LXEJ02009095	2897064	2959472	+	100	30.32
NM_001008973.2	381107	Eve2	LXEJ02008289	27566	36858	+	100	26.85
NM_001008973.2	381107	Eve2	LXEJ02011956	1830	86412	+	97.39	40.95
NM_026844.3	66531	Eve2	LXEJ02007443	2524037	2529511	-	100	86.59
NM_023906.3	65257	Eve2	LXEJ02000293	48926	96169	-	100	83.31
NM_023906.3	65257	Eve2	LXEJ02009098	545308	625643	+	95.63	18.72
NM_011282.2	19886	Eve2	LXEJ02002782	3359248	3411258	-	100	34.86
NM_011282.2	19886	Eve2	LXEJ02003543	491	18034	-	99.89	24.87
NM_011282.2	19886	Eve2	LXEJ02002144	47701	52812	-	100	7.63
NM_011282.2	19886	Eve2	LXEJ02004310	7021	52909	+	98.85	31.67
NM_007733.2	12823	Eve2	LXEJ02002111	3626	84642	+	99.9	86.47
NM_007733.2	12823	Eve2	LXEJ02007732	7189	86444	-	100	10.83
NM_007733.2	12823	Eve2	LXEJ02000751	33011	119955	-	100	2.41
NM_029509.4	76074	Eve2	LXEJ02001476	101480	106171	-	100	71.45
NM_029509.4	76074	Eve2	LXEJ02011286	33548	36247	+	100	11.02
NM_029509.4	76074	Eve2	LXEJ02010093	8314	19533	+	99.77	17.89
NM_025985.4	67128	Eve2	LXEJ02008759	54146	77556	+	100	90.3
NM_025985.4	67128	Eve2	LXEJ02004858	12633	13007	-	100	9.77
NM_032007.3	83996	Eve2	LXEJ02011948	67761	70957	-	100	53.88
NM_032007.3	83996	Eve2	LXEJ02001165	23082	26453	+	100	46.36
NM_010146.2	13853	Eve2	LXEJ02004889	63277	129940	-	100	69.97
NM_010146.2	13853	Eve2	LXEJ02006372	28696	29025	-	99.39	30.58
NM_178259.3	268379	Eve2	LXEJ02003633	2253	168245	-	99.94	63.45
NM_178259.3	268379	Eve2	LXEJ02004029	66090	299001	-	99.97	26.31
NM_178259.3	268379	Eve2	LXEJ02003167	16179	81857	-	99.76	10.6
NM_198111.2	238161	Eve2	LXEJ02011991	1561419	2016876	-	99.92	95.21
NM_198111.2	238161	Eve2	LXEJ02003314	18393	117072	-	99.81	5.31
NM_011077.2	18675	Eve2	LXEJ02010222	16688	125069	+	100	69.16
NM_011077.2	18675	Eve2	LXEJ02000537	2678	127633	-	96.94	35.75
NM_008517.2	16993	Eve2	LXEJ02004172	2282487	2298634	-	99.47	64.47
NM_008517.2	16993	Eve2	LXEJ02002694	1075	14842	-	100	36.39
NM_008855.2	18751	Eve2	LXEJ02005172	273045	369330	-	99.9	87.41
NM_008855.2	18751	Eve2	LXEJ02005304	6803	246233	-	100	12.88
NM_008174.2	14823	Eve2	LXEJ02012661	67858	76613	-	99.88	23.96
NM_008174.2	14823	Eve2	LXEJ02006932	61854	787711	+	99.05	74.19
NM_001039646.2	626578	Eve2	LXEJ02010730	690	18206	+	99.26	92.2
NM_133207.2	170738	Eve2	LXEJ02001498	184695	729630	+	99.41	85.57
NM_133207.2	170738	Eve2	LXEJ02007725	10868	24575	-	100	17.56
NM_008074.2	14407	Eve2	LXEJ02007094	1514893	2180179	+	99.41	81.41
NM_008074.2	14407	Eve2	LXEJ02001650	26198	35556	-	97.52	21.57
NM_011261.2	19699	Eve2	LXEJ02009094	617575	814094	-	100	87.68
NM_011261.2	19699	Eve2	LXEJ02005848	23186	80992	+	100	5.45
NM_011261.2	19699	Eve2	LXEJ02006916	49115	117166	+	99.7	5.77
NM_009390.2	21892	Eve2	LXEJ02001384	79186	189417	+	100	84.19
NM_009390.2	21892	Eve2	LXEJ02011778	83022	83799	+	99.87	15.78
NM_023873.3	68121	Eve2	LXEJ02004957	463636	488337	-	100	70.34
NM_007400.2	11489	Eve2	LXEJ02012184	74157	217805	+	99.98	93.87
NM_007400.2	11489	Eve2	LXEJ02007990	1222354	1274570	+	100	5.34
NM_010158.2	13992	Eve2	LXEJ02011364	50981	149415	-	100	78.14
NM_010158.2	13992	Eve2	LXEJ02007742	38118	68281	+	95.16	28.3
NM_008481.2	16773	Eve2	LXEJ02007095	174482	829853	+	99.83	85.57
NM_008481.2	16773	Eve2	LXEJ02012204	5309	90824	+	99.63	11.12
NM_008481.2	16773	Eve2	LXEJ02006085	34823	44257	+	98.32	4.29
NM_008779.2	18488	Eve2	LXEJ02007885	10764	18149	+	100	46.2
NM_008779.2	18488	Eve2	LXEJ02011884	2512	93534	-	99.89	38.52
NM_008779.2	18488	Eve2	LXEJ02003443	7773	78368	-	95.69	10.14
NM_001077687.1	80877	Eve2	LXEJ02000914	34478	256998	+	99.55	30.4
NM_001077687.1	80877	Eve2	LXEJ02008490	1862	105533	-	99.77	34.58
NM_001077687.1	80877	Eve2	LXEJ02000329	15156	135534	+	99.41	36.47
NM_001077688.1	80877	Eve2	LXEJ02000914	34478	287255	+	99.62	34.51
NM_001077688.1	80877	Eve2	LXEJ02008490	1862	105533	-	99.77	32.64
NM_001077688.1	80877	Eve2	LXEJ02000329	15156	112518	+	99.93	33.71
NM_030695.2	80877	Eve2	LXEJ02000914	34478	292974	+	99.65	37.79
NM_030695.2	80877	Eve2	LXEJ02008490	1862	105533	-	99.77	30.94
NM_030695.2	80877	Eve2	LXEJ02000329	15156	143488	+	99.35	32.83
NM_009782.3	12290	Eve2	LXEJ02004067	3280	61867	+	100	70.63
NM_009782.3	12290	Eve2	LXEJ02005487	12695	40392	-	100	21.04
NM_009782.3	12290	Eve2	LXEJ02004182	661066	852199	-	96.43	9.98
NM_172912.4	244562	Eve2	LXEJ02012001	783	56885	+	100	93.21
NM_138304.2	75600	Eve2	LXEJ02003945	4204	11441	+	100	89.66
NM_011157.2	19073	Eve2	LXEJ02011410	5545	9042	+	100	88.05
NM_172648.3	226695	Eve2	LXEJ02005660	2586	7812	-	100	44.01
NM_172648.3	226695	Eve2	LXEJ02004078	221	5894	+	99.34	56.91
NM_172290.3	235106	Eve2	LXEJ02008899	1403900	1827863	-	99.49	86.94
NM_172290.3	235106	Eve2	LXEJ02004836	6539824	6540109	+	100	15.81
NM_153807.2	264895	Eve2	LXEJ02007798	5997	22180	+	99.66	95.6
NM_170778.2	99586	Eve2	LXEJ02006735	21815	600982	+	99.62	54.72
NM_170778.2	99586	Eve2	LXEJ02010405	37135	88454	-	98.68	41.04
NM_025700.2	66681	Eve2	LXEJ02012074	4562	28042	-	99.83	82.46
NM_025700.2	66681	Eve2	LXEJ02002887	3811713	3812100	-	100	17.8
NM_026904.2	68999	Eve2	LXEJ02009988	14461	16853	+	99.95	85.4
NM_026904.2	68999	Eve2	LXEJ02005833	24691	42176	-	94.52	16.63
NM_025696.3	66673	Eve2	LXEJ02005106	1362622	1769766	-	100	86.27
NM_025696.3	66673	Eve2	LXEJ02004103	2169234	2170010	+	99.87	13.79
NM_175548.3	268890	Eve2	LXEJ02001490	1858976	2117157	+	100	92.37
NM_177230.3	320696	Eve2	LXEJ02001489	8822	61402	-	100	87.18
NM_177230.3	320696	Eve2	LXEJ02004060	2153	6463	+	100	12.87
NM_177233.5	320701	Eve2	LXEJ02010726	38645	71352	-	100	75.52
NM_177233.5	320701	Eve2	LXEJ02012463	39120	85163	-	99.63	24.88
NM_021879.2	18431	Eve2	LXEJ02004435	11441	103733	-	100	66.25
NM_021879.2	18431	Eve2	LXEJ02006037	9995	82289	+	100	15.51
NM_021879.2	18431	Eve2	LXEJ02009725	36892	37472	-	100	18.62
NM_177380.3	337924	Eve2	LXEJ02010261	27758	28218	-	100	23.49
NM_177328.3	108073	Eve2	LXEJ02012350	5578	371851	+	99.73	63.59
NM_177328.3	108073	Eve2	LXEJ02009883	195327	202786	-	99.63	19.44
NM_177328.3	108073	Eve2	LXEJ02004498	78016	91736	-	99.67	7.27
NM_009148.3	20336	Eve2	LXEJ02003994	45346	238256	+	98.17	39.26
NM_009148.3	20336	Eve2	LXEJ02008736	1378300	1593326	-	100	59.22
NM_009149.2	20340	Eve2	LXEJ02002841	2497630	2541633	-	100	88.86
NM_009149.2	20340	Eve2	LXEJ02008121	7261	7692	-	100	11.13
NM_019880.3	56462	Eve2	LXEJ02004911	3418481	3429350	-	98.82	79.14
NM_019880.3	56462	Eve2	LXEJ02005269	296	752	-	98.46	23.82
NM_029585.3	76375	Eve2	LXEJ02002837	3335393	3348498	+	99.93	71.4
NM_029585.3	76375	Eve2	LXEJ02002498	406263	406907	-	99.68	29.09
NM_019514.3	56079	Eve2	LXEJ02007989	34372	416012	+	100	35.29
NM_019514.3	56079	Eve2	LXEJ02011264	25822	187796	+	100	34.2
NM_019514.3	56079	Eve2	LXEJ02000269	25952	126548	+	98.11	14.78
NM_019514.3	56079	Eve2	LXEJ02010898	13418	43354	-	95.49	17
NM_019496.3	56068	Eve2	LXEJ02007024	41787	47284	-	100	75.97
NM_019496.3	56068	Eve2	LXEJ02010704	18533	28902	-	97.62	18.65
NM_199055.2	71367	Eve2	LXEJ02001135	31183	32340	+	99.91	84.58
NM_016909.2	53424	Eve2	LXEJ02004901	2253564	2263248	-	100	81.76
NM_016909.2	53424	Eve2	LXEJ02005851	4740	7512	-	100	18.23
NM_198612.2	232313	Eve2	LXEJ02011720	28457	50425	+	100	60.95
NM_198612.2	232313	Eve2	LXEJ02012463	3733280	3779071	+	100	39.1
NM_008167.2	14804	Eve2	LXEJ02008958	141984	1569689	-	99.49	72.18
NM_008167.2	14804	Eve2	LXEJ02007606	58980	76633	-	100	9.32
NM_008167.2	14804	Eve2	LXEJ02006751	32386	32711	-	98.77	10.71
NM_008167.2	14804	Eve2	LXEJ02012395	6100	63009	-	95.09	11.97
NM_008182.3	14858	Eve2	LXEJ02004586	3033	10711	+	100	80.81
NM_198702.2	319387	Eve2	LXEJ02001024	1956158	2027821	-	100	42.94
NM_198702.2	319387	Eve2	LXEJ02008157	14634	553991	-	99.8	34.42
NM_198702.2	319387	Eve2	LXEJ02008216	2004	57146	-	98.71	24.13
NM_013829.2	18798	Eve2	LXEJ02006529	1085874	1331933	+	100	80.57
NM_013829.2	18798	Eve2	LXEJ02005217	296	24447	+	98.68	20.5
NM_013927.2	30952	Eve2	LXEJ02001194	1315482	1430793	-	99.97	77.82
NM_013927.2	30952	Eve2	LXEJ02009699	11135	105519	-	100	20.43
NM_001037906.2	338352	Eve2	LXEJ02007874	29956	332534	+	99.92	48
NM_001037906.2	338352	Eve2	LXEJ02004869	23505	37134	+	99.75	14.43
NM_001037906.2	338352	Eve2	LXEJ02005993	2871	60957	-	99.69	11.62
NM_001037906.2	338352	Eve2	LXEJ02001931	8392	38403	+	99.35	10.98
NM_207109.2	56079	Eve2	LXEJ02007989	34371	416012	+	100	34.17
NM_207109.2	56079	Eve2	LXEJ02011264	25822	187796	+	100	33.09
NM_207109.2	56079	Eve2	LXEJ02000269	25952	126548	+	98.25	14.24
NM_207109.2	56079	Eve2	LXEJ02010898	13418	43354	-	96.08	15.79
NM_015793.2	50757	Eve2	LXEJ02009201	22544	30326	-	99.71	70.94
NM_130886.3	170720	Eve2	LXEJ02004974	353454	374697	-	100	74.81
NM_130886.3	170720	Eve2	LXEJ02004893	4312333	4321827	+	99.91	29.58
NM_015803.2	50769	Eve2	LXEJ02010592	3222	44279	-	99.94	46.4
NM_015803.2	50769	Eve2	LXEJ02007291	700295	983827	-	99.72	39.43
NM_015803.2	50769	Eve2	LXEJ02007496	2533	45059	-	99.63	14.78
NM_053195.2	94249	Eve2	LXEJ02000378	1511268	1640465	-	99.75	93.1
NM_001029912.2	74464	Eve2	LXEJ02000947	26949	65223	+	99.97	87.78
NM_001029912.2	74464	Eve2	LXEJ02005066	337570	338232	+	100	12.28
NM_019635.2	56274	Eve2	LXEJ02001902	29258	112821	+	100	58.74
NM_019635.2	56274	Eve2	LXEJ02000492	6538	122351	-	100	31.52
NM_019635.2	56274	Eve2	LXEJ02002682	226841	227120	+	100	9.56
NM_001079686.1	64009	Eve2	LXEJ02003805	915178	1012377	+	100	52.37
NM_001079686.1	64009	Eve2	LXEJ02001916	102785	169049	-	99.98	47.62
NM_009205.2	20532	Eve2	LXEJ02005212	5346	22936	+	100	57.87
NM_009205.2	20532	Eve2	LXEJ02001036	4110	13060	-	100	42.21
NM_175437.3	212167	Eve2	LXEJ02009094	3108	24909	+	100	55.91
NM_175437.3	212167	Eve2	LXEJ02005153	12287	80049	-	100	42.72
NM_024282.3	78825	Eve2	LXEJ02006067	246329	260868	-	100	87.16
NM_024282.3	78825	Eve2	LXEJ02006812	1635	11551	+	98.81	13.92
NM_026835.2	68774	Eve2	LXEJ02012168	962331	968646	-	100	68.7
NM_026835.2	68774	Eve2	LXEJ02001724	3293	6269	-	99.76	30.76
NM_009506.2	22341	Eve2	LXEJ02005855	17014	46512	+	100	79.16
NM_009506.2	22341	Eve2	LXEJ02006146	99795	100189	+	100	20.99
NM_030174.2	78771	Eve2	LXEJ02001394	17847	124166	+	99.95	53.67
NM_030174.2	78771	Eve2	LXEJ02002835	13106	277586	-	100	39.68
NM_030174.2	78771	Eve2	LXEJ02010462	41842	42132	+	100	6.78
NM_080438.2	110304	Eve2	LXEJ02004376	269623	417995	-	100	68.38
NM_080438.2	110304	Eve2	LXEJ02008758	2346	17265	+	98.56	32.83
NM_016718.2	29862	Eve2	LXEJ02007140	204842	207277	-	100	90.38
NM_177393.4	338370	Eve2	LXEJ02011998	523367	656550	-	100	71.98
NM_177393.4	338370	Eve2	LXEJ02003556	12103	12435	-	99.39	4.68
NM_177393.4	338370	Eve2	LXEJ02000942	11583	42460	+	99.3	12.15
NM_177393.4	338370	Eve2	LXEJ02000993	29609	109722	-	97.55	13.12
NM_173754.4	216835	Eve2	LXEJ02005017	2004	48901	-	99.87	54.81
NM_173754.4	216835	Eve2	LXEJ02008162	303837	305858	-	100	45.31
NM_026719.2	68421	Eve2	LXEJ02006656	41209	78963	-	100	84.42
NM_026719.2	68421	Eve2	LXEJ02008727	36235	75812	+	100	15.51
NM_019497.2	14772	Eve2	LXEJ02004961	5435	61385	-	100	54.56
NM_019497.2	14772	Eve2	LXEJ02008906	4919	30213	+	100	37.66
NM_010871.2	17952	Eve2	LXEJ02005743	12078	33952	+	99.91	54.67
NM_010871.2	17952	Eve2	LXEJ02012398	5980	13046	+	100	45.41
NM_010870.2	17951	Eve2	LXEJ02005515	6533	28185	+	100	81.82
NM_010870.2	17951	Eve2	LXEJ02011760	1	1486	-	97.56	10.45
NM_011147.1	237178	Eve2	LXEJ02001120	83824	107529	-	100	72.41
NM_011147.1	237178	Eve2	LXEJ02010706	1296504	1357285	-	99.85	28.31
NM_001033326.2	236082	Eve2	LXEJ02008836	34905	40424	-	99.82	76.39
NM_153534.2	210044	Eve2	LXEJ02001766	9501	277534	+	100	84.25
NM_153534.2	210044	Eve2	LXEJ02006442	63748	103036	-	99.57	16.69
NM_001077713.1	71238	Eve2	LXEJ02007315	66548	70726	-	99.48	70
NM_001077713.1	71238	Eve2	LXEJ02002946	87161	87354	+	97.93	34.72
NM_053171.2	94109	Eve2	LXEJ02008547	1591601	1830331	-	100	69.47
NM_053171.2	94109	Eve2	LXEJ02004176	788346	802548	+	99.75	2.91
NM_053171.2	94109	Eve2	LXEJ02003386	1613	136847	-	99.66	10.57
NM_053171.2	94109	Eve2	LXEJ02002667	10965	64726	+	99.35	8.74
NM_053171.2	94109	Eve2	LXEJ02000919	39353	39870	-	98.46	3.62
NM_053171.2	94109	Eve2	LXEJ02004035	10663	134417	-	96.01	2.23
NM_177290.3	320910	Eve2	LXEJ02001433	2318	48104	+	100	80.49
NM_026788.1	665563	Eve2	LXEJ02002399	7347	69009	+	100	75.79
NM_026788.1	665563	Eve2	LXEJ02000854	102708	118359	+	100	18.88
NM_133921.2	100978	Eve2	LXEJ02008946	512309	540004	+	100	80.19
NM_133921.2	100978	Eve2	LXEJ02008946	7712	17064	-	100	19.8
NM_030207.2	78887	Eve2	LXEJ02002517	2713	41207	-	98.68	83.35
NM_030207.2	78887	Eve2	LXEJ02004962	1866	9262	-	100	11.52
NM_026327.3	67708	Eve2	LXEJ02004987	1380	14692	+	99.96	58.3
NM_026327.3	67708	Eve2	LXEJ02003951	174338	205236	+	99.81	49.9
NM_177047.3	319974	Eve2	LXEJ02003823	33768	73121	-	99.83	79.37
NM_177047.3	319974	Eve2	LXEJ02012522	140341	1183407	+	98.22	23.08
NM_001081012.1	320226	Eve2	LXEJ02002212	15426	111813	+	100	47.62
NM_001081012.1	320226	Eve2	LXEJ02010092	14356	109769	-	99.87	34.29
NM_001081012.1	320226	Eve2	LXEJ02006572	34119	103806	+	99.72	16.13
NM_001081327.1	195646	Eve2	LXEJ02000298	72412	73765	-	100	59.64
NM_001081327.1	195646	Eve2	LXEJ02011265	27500	28419	-	100	40.52
NM_001081341.1	244891	Eve2	LXEJ02005672	223124	531690	-	99.96	61.24
NM_001081341.1	244891	Eve2	LXEJ02012113	755	80789	-	99.94	36.18
NM_001081295.1	622434	Eve2	LXEJ02006108	20682	105316	+	99.9	62.05
NM_001081295.1	622434	Eve2	LXEJ02007698	126924	139730	+	99.65	38.63
NM_001081351.1	214642	Eve2	LXEJ02011808	1235139	1514599	+	99.26	85.85
NM_001081351.1	214642	Eve2	LXEJ02004446	1386	40029	-	99.87	16.29
NM_001081281.1	381485	Eve2	LXEJ02006926	775702	808140	-	100	72.8
NM_001081281.1	381485	Eve2	LXEJ02002252	4793	5780	-	100	27.47
NM_001081277.1	229949	Eve2	LXEJ02005966	5469	69491	+	99.94	59.39
NM_001081277.1	229949	Eve2	LXEJ02010145	48438	132347	-	97.91	41.44
NM_001081264.1	320438	Eve2	LXEJ02008391	204888	230221	-	100	88.31
NM_001081264.1	320438	Eve2	LXEJ02000531	3939	22171	-	97.74	9.92
NM_001081195.1	238247	Eve2	LXEJ02010530	103831	159717	+	100	37.35
NM_001081195.1	238247	Eve2	LXEJ02004264	3329	5181	+	100	32.05
NM_001081184.1	230393	Eve2	LXEJ02011070	2257	186974	-	99.95	39.21
NM_001081184.1	230393	Eve2	LXEJ02000808	9086	28135	+	100	27.51
NM_001081184.1	230393	Eve2	LXEJ02011305	2589	77599	-	99.33	31.1
NM_001081402.1	545085	Eve2	LXEJ02005474	3165030	3343738	+	100	69.31
NM_001081402.1	545085	Eve2	LXEJ02011401	3625	35615	+	97.59	34.58
NM_001081153.1	208898	Eve2	LXEJ02008443	74163	173286	-	100	39.1
NM_001081153.1	208898	Eve2	LXEJ02001993	100322	103292	-	100	36.76
NM_001081153.1	208898	Eve2	LXEJ02008944	577201	772583	+	99.38	23.92
NM_001081141.1	242425	Eve2	LXEJ02012546	87352	173034	-	100	61.95
NM_001081141.1	242425	Eve2	LXEJ02010635	9206	213479	-	100	38.09
NM_001081137.1	69983	Eve2	LXEJ02010275	2846	69278	-	100	87.82
NM_001081137.1	69983	Eve2	LXEJ02011997	2106653	2109842	-	100	12.21
NM_001081074.1	69865	Eve2	LXEJ02006267	86383	90826	-	99.95	61.07
NM_001081074.1	69865	Eve2	LXEJ02006377	6442	72529	-	99.47	39.26
NM_001081121.1	70989	Eve2	LXEJ02007418	130375	133814	-	100	35.85
NM_001081121.1	70989	Eve2	LXEJ02008910	421263	474367	-	98.91	65.44
NM_001081428.1	75906	Eve2	LXEJ02006612	56216	78245	-	100	46.22
NM_001081428.1	75906	Eve2	LXEJ02009398	3895	80232	-	99.95	53.87
NM_009099.2	20128	Eve2	LXEJ02002608	13622	16914	+	100	73.58
NM_009099.2	20128	Eve2	LXEJ02010660	2182	38252	-	100	25.88
NM_145146.2	280662	Eve2	LXEJ02005164	5915	18681	-	100	53.85
NM_145146.2	280662	Eve2	LXEJ02000836	4412	19161	+	99.89	46.24
NM_018733.2	20265	Eve2	LXEJ02000173	81402	110275	+	100	28.16
NM_018733.2	20265	Eve2	LXEJ02012351	62089	129528	+	99.32	58.65
NM_018733.2	20265	Eve2	LXEJ02008541	1283138	1291474	-	99.43	14.93
NM_001029934.1	237898	Eve2	LXEJ02004850	2591436	2667563	-	99.88	89.44
NM_001029934.1	237898	Eve2	LXEJ02004109	2302403	2372236	+	99.23	11.27
NM_001081642.1	434794	Eve2	LXEJ02010131	12455	18227	+	100	60.62
NM_001081642.1	434794	Eve2	LXEJ02012609	1636	2223	+	100	39.54
NM_146563.1	18315	Eve2	LXEJ02001676	4580	5553	+	100	84.25
NM_001081648.1	434864	Eve2	LXEJ02004588	2928	25514	+	99.68	61.98
NM_001081648.1	434864	Eve2	LXEJ02008860	6404	7049	+	99.69	31.85
NM_001081653.1	620292	Eve2	LXEJ02004123	82470	109647	+	100	23.43
NM_001081653.1	620292	Eve2	LXEJ02009804	650998	1049827	-	98.97	64.21
NM_001081653.1	620292	Eve2	LXEJ02010780	25961	148486	-	97.98	10
NM_153179.3	241035	Eve2	LXEJ02008131	5049	42645	-	100	22.09
NM_153179.3	241035	Eve2	LXEJ02008254	988	23418	-	99.92	10.72
NM_153179.3	241035	Eve2	LXEJ02003948	10530	38411	-	99.67	16.69
NM_153179.3	241035	Eve2	LXEJ02000505	1727	35724	-	99.7	7.79
NM_153179.3	241035	Eve2	LXEJ02009794	23051	111853	-	99.62	14.48
NM_153179.3	241035	Eve2	LXEJ02000458	62161	86140	-	99.26	10.53
NM_153179.3	241035	Eve2	LXEJ02008600	962	38645	+	97.35	2.3
NM_139300.3	107589	Eve2	LXEJ02012166	1382	109027	+	100	80.01
NM_139300.3	107589	Eve2	LXEJ02005063	204940	300289	+	100	20
NM_011413.2	625018	Eve2	LXEJ02011693	1	11053	+	99.36	79.61
NM_213615.2	381287	Eve2	LXEJ02010576	8571	21147	-	99.43	70.62
NM_213615.2	381287	Eve2	LXEJ02009170	1175	1701	-	98.86	29.94
NM_001013817.2	434484	Eve2	LXEJ02003886	966	13519	+	99.73	46.83
NM_001013817.2	434484	Eve2	LXEJ02006838	9451	9949	+	98.79	20.64
NM_001013817.2	434484	Eve2	LXEJ02003628	4426	5642	+	98.81	13.81
NM_001013817.2	434484	Eve2	LXEJ02008867	1801	18622	+	94.69	14.97
NM_029249.2	75317	Eve2	LXEJ02006968	35097	37428	-	100	53.03
NM_029249.2	75317	Eve2	LXEJ02010424	61632	98331	+	98.52	48.51
NM_028260.2	66541	Eve2	LXEJ02005338	5536	38015	-	100	57.69
NM_028260.2	66541	Eve2	LXEJ02008909	4522476	4523853	+	100	42.4
NM_176957.3	210356	Eve2	LXEJ02006367	137134	752246	+	100	84.99
NM_176957.3	210356	Eve2	LXEJ02004005	32588	32903	-	100	10.53
NM_001081963.1	240185	Eve2	LXEJ02011874	6808	17163	+	100	93.56
NM_001081963.1	240185	Eve2	LXEJ02004630	5866	20344	-	100	6.46
NM_198105.2	207375	Eve2	LXEJ02000908	950132	1024587	-	100	86.48
NM_198105.2	207375	Eve2	LXEJ02008008	8126	45890	-	100	13.56
NM_172851.2	241175	Eve2	LXEJ02002598	830075	1053645	-	100	30.58
NM_172851.2	241175	Eve2	LXEJ02011332	12636	100900	+	100	25.76
NM_172851.2	241175	Eve2	LXEJ02004289	112	32552	+	99.39	35.29
NM_172851.2	241175	Eve2	LXEJ02002574	39399	58901	-	99.69	6.3
NM_008983.2	19272	Eve2	LXEJ02009616	18272	64051	+	100	60.33
NM_008983.2	19272	Eve2	LXEJ02001605	8814	454236	-	99.72	40.52
NM_007611.2	12369	Eve2	LXEJ02003273	17600	27217	+	100	87.27
NM_146041.2	218138	Eve2	LXEJ02001495	1019803	1434605	+	100	89.4
NM_007766.2	12936	Eve2	LXEJ02008908	410900	442402	-	100	53.77
NM_007766.2	12936	Eve2	LXEJ02011707	16705	28525	-	99.95	46.46
NM_177341.4	226025	Eve2	LXEJ02007289	17754	150955	+	100	73.88
NM_177341.4	226025	Eve2	LXEJ02003732	53160	149184	+	100	21.27
NM_177341.4	226025	Eve2	LXEJ02010005	195083	195359	-	96.38	5.33
NM_175397.4	109032	Eve2	LXEJ02009923	2489	18550	-	98.32	64.04
NM_175397.4	109032	Eve2	LXEJ02012410	13431	22748	-	96.18	49.58
NM_010403.2	15112	Eve2	LXEJ02008652	66167	74474	-	99.76	63.82
NM_010403.2	15112	Eve2	LXEJ02007372	21715	55613	+	98.61	38.98
NM_010099.2	13607	Eve2	LXEJ02006177	1319268	1410034	-	100	88.53
NM_010099.2	13607	Eve2	LXEJ02002582	173319	173899	+	98.96	11.72
NM_010651.3	16640	Eve2	LXEJ02003168	253	10816	-	97.58	69.17
NM_010651.3	16640	Eve2	LXEJ02000583	33290	37162	-	97.67	39.69
NM_018760.2	54403	Eve2	LXEJ02004814	5350	122598	+	100	88.38
NM_018760.2	54403	Eve2	LXEJ02004728	14348	225805	+	98.09	12.56
NM_010650.3	16639	Eve2	LXEJ02003912	2781	10578	-	100	57.37
NM_001001980.2	77569	Eve2	LXEJ02001548	59085	152196	+	100	47.44
NM_001001980.2	77569	Eve2	LXEJ02002887	877532	1190688	-	99.48	53.43
NM_178730.3	243083	Eve2	LXEJ02003814	5590	29262	+	99.97	92.14
NM_178705.5	233271	Eve2	LXEJ02001391	287788	731132	+	99.78	95.35
NM_010418.2	15204	Eve2	LXEJ02004435	111704	179763	-	99.98	48.63
NM_010418.2	15204	Eve2	LXEJ02010749	5656	80153	+	99.9	48.25
NM_010418.2	15204	Eve2	LXEJ02003668	16675	38974	+	98.06	3.35
NM_011204.2	19249	Eve2	LXEJ02007086	500771	640622	+	99.85	66.28
NM_011204.2	19249	Eve2	LXEJ02000254	1	42172	+	99.97	46.57
NM_001083806.1	14800	Eve2	LXEJ02001537	2421	58681	+	99.98	90.7
NM_001083806.1	14800	Eve2	LXEJ02003275	54685	55831	-	100	9.29
NM_183166.2	233164	Eve2	LXEJ02004733	765722	773873	-	100	12.2
NM_054041.2	69538	Eve2	LXEJ02004952	6062	61040	+	100	73.13
NM_054041.2	69538	Eve2	LXEJ02004951	1238648	1378456	+	99.37	27.42
NM_010252.4	14405	Eve2	LXEJ02006736	470400	473650	+	99.93	68.14
NM_010252.4	14405	Eve2	LXEJ02008733	12188	32628	+	100	18.38
NM_010252.4	14405	Eve2	LXEJ02001317	15896	42556	+	100	13.64
NM_001076679.2	751864	Eve2	LXEJ02003109	6573	18461	-	100	82.03
NM_177759.3	269693	Eve2	LXEJ02002834	6120431	6251908	-	100	51.12
NM_177759.3	269693	Eve2	LXEJ02005519	2287	13800	+	100	42.79
NM_028576.2	73582	Eve2	LXEJ02004955	157992	224980	+	100	72.06
NM_028576.2	73582	Eve2	LXEJ02005212	49395	55359	+	100	23.48
NM_026220.4	67532	Eve2	LXEJ02001795	1878	12054	+	99.81	94.17
NM_172786.2	237313	Eve2	LXEJ02005757	18277	35429	-	100	93.19
NM_011831.2	23919	Eve2	LXEJ02008852	1175330	1175540	+	100	29.71
NM_011831.2	23919	Eve2	LXEJ02005623	2046	2540	+	98.19	72.15
NM_013794.4	27424	Eve2	LXEJ02001155	114223	130998	+	93.05	83.14
NM_177898.4	330721	Eve2	LXEJ02006314	644	24549	+	100	59.69
NM_177898.4	330721	Eve2	LXEJ02001025	8884	26256	-	100	40.43
NM_027964.2	71861	Eve2	LXEJ02006205	24889	38552	-	99.43	85.74
NM_027964.2	71861	Eve2	LXEJ02007865	4263	6758	+	99.69	16.14
NM_172776.2	236293	Eve2	LXEJ02008713	4315	29750	-	100	50.58
NM_172776.2	236293	Eve2	LXEJ02004191	31229	64607	-	98.79	56.02
NM_008710.3	18115	Eve2	LXEJ02002731	1021040	1095730	-	99.13	86.06
NM_172447.2	207686	Eve2	LXEJ02010623	5032	20091	+	100	42.71
NM_172447.2	207686	Eve2	LXEJ02005514	7485	29548	+	99.91	34.79
NM_172447.2	207686	Eve2	LXEJ02010903	1853202	1877305	+	100	22.74
NM_025402.2	66179	Eve2	LXEJ02009294	200908	210480	+	99.87	62.51
NM_025402.2	66179	Eve2	LXEJ02007802	1487809	1494400	-	100	37.81
NM_010400.2	15101	Eve2	LXEJ02006591	25380	37593	+	90.85	20.23
NM_010400.2	15101	Eve2	LXEJ02010378	50340	51955	+	77.38	26.28
NM_010400.2	15101	Eve2	LXEJ02012292	26832	28316	-	75.96	33.36
NM_028499.2	73314	Eve2	LXEJ02010350	1353847	1376225	-	99.74	32.56
NM_028499.2	73314	Eve2	LXEJ02011700	27067	31880	-	98.96	23.71
NM_028499.2	73314	Eve2	LXEJ02006893	35980	36257	-	98.92	22.97
NM_177010.3	319823	Eve2	LXEJ02007998	17327	70513	-	90.06	85.35
NM_011474.3	20762	Eve2	LXEJ02000388	711033	712564	-	99.68	85.63
NM_172706.3	231014	Eve2	LXEJ02007985	640745	710880	+	99.97	87.52
NM_172706.3	231014	Eve2	LXEJ02004996	44498	63596	+	100	6.89
NM_172706.3	231014	Eve2	LXEJ02006761	75486	104784	+	95.7	6.95
NM_133353.3	170834	Eve2	LXEJ02007131	35511	36467	-	100	55.32
NM_133353.3	170834	Eve2	LXEJ02012168	1064780	1068496	-	100	44.67
NM_053153.2	93970	Eve2	LXEJ02006498	13930	21667	+	96.04	56.9
NM_053153.2	93970	Eve2	LXEJ02009190	3090	12430	+	96.38	43.98
NM_175678.3	319239	Eve2	LXEJ02004209	208541	304578	-	99.88	91.53
NM_177002.3	319800	Eve2	LXEJ02008831	5203	23881	+	99.8	51.82
NM_177002.3	319800	Eve2	LXEJ02000800	32114	34478	-	99.8	25.93
NM_001033227.2	109342	Eve2	LXEJ02004844	979278	985154	-	100	45.77
NM_001033227.2	109342	Eve2	LXEJ02007240	19989	36561	-	99.28	55.41
NM_029238.2	75288	Eve2	LXEJ02006173	1304603	1328566	-	100	82.61
NM_029238.2	75288	Eve2	LXEJ02001216	105323	105656	+	99.4	17.75
NM_178681.4	217480	Eve2	LXEJ02001187	59275	104196	+	99.8	54.83
NM_178681.4	217480	Eve2	LXEJ02005957	8869	140871	-	97.38	28.58
NM_178681.4	217480	Eve2	LXEJ02002836	101664	664800	+	97.47	21.23
NM_028757.2	74103	Eve2	LXEJ02010194	114581	142196	+	100	81.07
NM_028757.2	74103	Eve2	LXEJ02002749	3974746	4175871	-	100	18.99
NM_183294.2	71091	Eve2	LXEJ02006453	93294	115964	-	100	79.81
NM_183294.2	71091	Eve2	LXEJ02000001	691057	712354	+	100	27.53
NM_001033214.2	105418	Eve2	LXEJ02005476	884986	889719	+	100	44.63
NM_011674.4	22239	Eve2	LXEJ02000540	1046406	1056692	+	100	74.38
NM_011674.4	22239	Eve2	LXEJ02011039	11730	35642	-	100	25.64
NM_172885.2	243274	Eve2	LXEJ02010654	84060	96887	+	100	49.67
NM_172885.2	243274	Eve2	LXEJ02011599	253175	551738	+	99.67	43.26
NM_201361.2	381110	Eve2	LXEJ02010230	4019	26290	+	100	40.45
NM_201361.2	381110	Eve2	LXEJ02012061	207106	213981	+	100	30.96
NM_201361.2	381110	Eve2	LXEJ02006724	1176798	1177321	-	99.8	29.07
NM_025736.2	66736	Eve2	LXEJ02002607	549736	586147	+	100	69.39
NM_025736.2	66736	Eve2	LXEJ02010854	6919	7304	+	99.74	31
NM_031378.3	83492	Eve2	LXEJ02003327	8121	12251	+	99.86	61.04
NM_031378.3	83492	Eve2	LXEJ02000359	21575	30954	+	100	39.16
NM_009014.3	19363	Eve2	LXEJ02005034	165955	203852	+	98.97	47.2
NM_009014.3	19363	Eve2	LXEJ02004979	610505	775773	-	98.27	58.88
NM_001002786.2	442827	Eve2	LXEJ02004911	3225739	3235604	+	99.92	63.53
NM_001033324.2	235320	Eve2	LXEJ02002771	50468	61501	+	99.88	66.87
NM_001033324.2	235320	Eve2	LXEJ02007792	7492	16190	-	98.44	31.38
NM_053150.2	93967	Eve2	LXEJ02009190	3090	12430	+	93.84	47.51
NM_053150.2	93967	Eve2	LXEJ02011278	2300	9885	-	92.8	61.72
NM_175448.3	215890	Eve2	LXEJ02004669	35130	66290	+	100	53.88
NM_175448.3	215890	Eve2	LXEJ02006342	7853	12715	-	98.92	41.08
NM_026484.3	67974	Eve2	LXEJ02010823	34706	107468	+	99.97	84.31
NM_026484.3	67974	Eve2	LXEJ02004550	59677	60309	+	100	15.75
NM_198659.2	381476	Eve2	LXEJ02004923	48217	85502	-	100	26.54
NM_198659.2	381476	Eve2	LXEJ02004569	117174	139826	+	99.69	46.91
NM_198659.2	381476	Eve2	LXEJ02010316	33138	72313	-	98.54	19.33
NM_198659.2	381476	Eve2	LXEJ02000657	305	103593	+	96.68	10.53
NM_026998.3	72183	Eve2	LXEJ02010848	10413	34895	-	100	85.15
NM_026998.3	72183	Eve2	LXEJ02005013	842429	861094	+	97.74	16.28
NM_183094.3	72891	Eve2	LXEJ02010131	12425	18227	+	99.2	60.3
NM_183094.3	72891	Eve2	LXEJ02012609	1632	2225	+	97.69	39
NM_080462.2	140483	Eve2	LXEJ02005376	11648	27972	+	100	84.26
NM_080462.2	140483	Eve2	LXEJ02007072	68734	72487	+	97.81	16.51
NM_145743.2	215951	Eve2	LXEJ02004959	883988	931648	-	100	61.36
NM_145743.2	215951	Eve2	LXEJ02003996	1098342	1176444	+	100	38.41
NM_009109.2	20190	Eve2	LXEJ02004211	5421050	5492634	+	100	70.29
NM_009109.2	20190	Eve2	LXEJ02011795	998	51332	+	99.93	29.98
NM_207270.2	545902	Eve2	LXEJ02001199	592863	617744	+	100	72.71
NM_207270.2	545902	Eve2	LXEJ02007982	157710	165345	+	99.54	27.43
NM_177033.3	319922	Eve2	LXEJ02011081	9185	118555	+	99.82	64.19
NM_177033.3	319922	Eve2	LXEJ02007342	14624	17216	-	100	36.1
NM_013935.3	30963	Eve2	LXEJ02002749	422095	442351	-	100	81.97
NM_009763.3	12182	Eve2	LXEJ02005055	8951	14957	+	100	69.26
NM_009763.3	12182	Eve2	LXEJ02005095	9565	17031	-	99.86	30.86
NM_007938.2	13840	Eve2	LXEJ02008281	48114	48781	-	100	15.85
NM_007938.2	13840	Eve2	LXEJ02008844	1314962	2092946	-	99.05	60.4
NM_007938.2	13840	Eve2	LXEJ02004779	1280	100247	+	98.59	16.87
NM_010492.3	15893	Eve2	LXEJ02006042	21509	63406	-	100	48.77
NM_010492.3	15893	Eve2	LXEJ02001763	1012601	1060909	-	99.09	52.48
NM_001025607.3	382275	Eve2	LXEJ02002990	16353	18025	+	100	21
NM_001025607.3	382275	Eve2	LXEJ02007516	5609	9854	+	99.31	34.5
NM_001025607.3	382275	Eve2	LXEJ02010137	21025	21197	-	98.26	20.87
NM_001081299.1	320865	Eve2	LXEJ02003990	7731	86960	-	100	36.07
NM_001081299.1	320865	Eve2	LXEJ02001192	183489	373979	+	100	32.68
NM_001081299.1	320865	Eve2	LXEJ02005116	7961	8451	+	100	17.89
NM_010806.1	17356	Eve2	LXEJ02011725	45653	105177	-	100	74.27
NM_010806.1	17356	Eve2	LXEJ02004822	110084	181974	+	100	24.09
NM_001085348.1	100040016	Eve2	LXEJ02008170	698	2942	-	99.63	71.11
NM_001085348.1	100040016	Eve2	LXEJ02010050	16181	18700	-	100	34.91
NM_001085356.1	434764	Eve2	LXEJ02010050	16181	18700	-	99.63	34.91
NM_001085356.1	434764	Eve2	LXEJ02008170	698	2942	-	97.11	71.11
NM_001085373.1	328949	Eve2	LXEJ02012198	52941	121414	-	99.97	87.24
NM_001085373.1	328949	Eve2	LXEJ02004794	4880	316531	-	99.03	13.14
NM_001085374.1	328949	Eve2	LXEJ02012198	52941	121414	-	99.97	87.6
NM_001085374.1	328949	Eve2	LXEJ02004794	4880	158119	-	99	12.78
NM_008584.3	17286	Eve2	LXEJ02010293	6503	18714	+	100	66.09
NM_008584.3	17286	Eve2	LXEJ02002313	151578	152376	+	100	34.02
NM_134080.1	286940	Eve2	LXEJ02005136	4845	83078	+	100	90.82
NM_134080.1	286940	Eve2	LXEJ02004445	84831	136756	+	99.52	9.29
NM_016667.3	20649	Eve2	LXEJ02007096	68014	225824	-	100	62.84
NM_016667.3	20649	Eve2	LXEJ02004729	22564	31467	+	99.84	30.93
NM_011891.4	24052	Eve2	LXEJ02007923	18621	20772	-	100	55.61
NM_011891.4	24052	Eve2	LXEJ02008926	25616	75739	+	100	20.22
NM_011891.4	24052	Eve2	LXEJ02005299	1846083	2030335	-	99.71	24.58
NM_011800.4	23836	Eve2	LXEJ02000977	5010	29671	+	100	60.02
NM_011800.4	23836	Eve2	LXEJ02007232	4797	28889	-	99.58	39.01
NM_027617.3	70951	Eve2	LXEJ02008007	94389	113487	-	99.89	50.93
NM_027617.3	70951	Eve2	LXEJ02007627	2231187	2249817	+	99.89	49.53
NM_134046.5	52504	Eve2	LXEJ02005386	99815	105465	-	100	80.72
NM_134046.5	52504	Eve2	LXEJ02006025	4280	14512	-	98.55	20.58
NM_029790.3	76894	Eve2	LXEJ02001979	143204	144203	-	100	52.88
NM_029790.3	76894	Eve2	LXEJ02000535	351744	498562	+	98.59	48.65
NM_172490.3	211006	Eve2	LXEJ02005028	664667	690273	-	99.83	93.4
NM_133733.4	71566	Eve2	LXEJ02007418	6611	19551	+	100	81.08
NM_133733.4	71566	Eve2	LXEJ02008910	191634	266584	+	99.64	19.18
NM_030711.4	80898	Eve2	LXEJ02011965	7419	43459	-	99.96	67.76
NM_030711.4	80898	Eve2	LXEJ02011754	16244	17546	-	99.92	32.46
NM_177225.4	320679	Eve2	LXEJ02003999	108110	372967	+	99.85	74.08
NM_177225.4	320679	Eve2	LXEJ02006694	61403	115386	+	96.92	31.04
NM_173376.3	209003	Eve2	LXEJ02000403	43865	48269	-	100	83.64
NM_173376.3	209003	Eve2	LXEJ02008539	603596	606047	-	99.65	16.52
NM_172827.3	240028	Eve2	LXEJ02008951	253042	278649	-	99.93	64.21
NM_172827.3	240028	Eve2	LXEJ02000811	61057	122789	+	99.94	36.01
NM_172685.3	229731	Eve2	LXEJ02001769	1133119	1190621	+	99.96	96.36
NM_177789.4	278180	Eve2	LXEJ02004215	8517	11300	+	99.63	57.4
NM_177346.4	229357	Eve2	LXEJ02003251	15289	25621	-	99.86	65.64
NM_177346.4	229357	Eve2	LXEJ02004634	8436	9588	-	99.82	34.56
NM_172815.3	239405	Eve2	LXEJ02002607	86531	159142	-	100	71.01
NM_172815.3	239405	Eve2	LXEJ02001982	19718	20805	-	100	29.04
NM_001033281.3	225518	Eve2	LXEJ02005020	3574	11278	+	100	41.63
NM_001033281.3	225518	Eve2	LXEJ02001061	30732	46516	+	99.34	23.26
NM_001033281.3	225518	Eve2	LXEJ02012357	938362	947557	+	99.04	36.17
NM_175441.5	213435	Eve2	LXEJ02012001	1205830	1220796	+	99.89	65.04
NM_175441.5	213435	Eve2	LXEJ02010366	883	18905	+	99.9	35.27
NM_175467.3	228677	Eve2	LXEJ02002895	987976	1088086	+	100	88.36
NM_175467.3	228677	Eve2	LXEJ02008013	18026	18428	+	100	11.74
NM_176073.4	54381	Eve2	LXEJ02005937	37400	74721	+	100	34.32
NM_176073.4	54381	Eve2	LXEJ02006750	27805	28264	+	100	23.92
NM_176073.4	54381	Eve2	LXEJ02008954	1308685	1723297	-	95.79	40.3
NM_001081133.2	16558	Eve2	LXEJ02006539	2278250	2419041	+	100	74.38
NM_001081133.2	16558	Eve2	LXEJ02011966	43937	116167	+	99.44	26.2
NM_001085499.1	209005	Eve2	LXEJ02011660	26605	50898	+	100	74.64
NM_001085499.1	209005	Eve2	LXEJ02005784	82614	87457	-	99.81	25.49
NM_018755.2	54381	Eve2	LXEJ02005937	20002	74721	+	97.2	36.95
NM_018755.2	54381	Eve2	LXEJ02006750	2232	28264	+	95.29	30.35
NM_018755.2	54381	Eve2	LXEJ02008954	1308685	1723297	-	95.94	41.23
NM_175628.3	232345	Eve2	LXEJ02006650	11345	36120	-	100	60.75
NM_175628.3	232345	Eve2	LXEJ02006933	2540943	2554712	-	99.67	39.4
NM_029847.4	77041	Eve2	LXEJ02002835	857547	872197	+	100	84.27
NM_153413.2	208869	Eve2	LXEJ02005315	18808	197234	+	100	42.89
NM_153413.2	208869	Eve2	LXEJ02009877	616842	638700	-	99.8	50.46
NM_153413.2	208869	Eve2	LXEJ02005665	13329	13778	-	98.66	4.96
NM_175484.3	235431	Eve2	LXEJ02004910	2888321	2901333	+	99.96	80.33
NM_175484.3	235431	Eve2	LXEJ02003588	14760	97414	-	99.86	19.71
NM_001081224.2	71373	Eve2	LXEJ02009139	89165	91196	-	100	91.36
NM_007767.3	12937	Eve2	LXEJ02011707	11077	13458	-	100	45.44
NM_007767.3	12937	Eve2	LXEJ02008908	410900	447546	-	99.75	55.07
NM_029949.3	77634	Eve2	LXEJ02005209	4991	23719	-	100	51.66
NM_029949.3	77634	Eve2	LXEJ02010887	74289	91283	-	99.26	58.91
NM_001033385.3	544696	Eve2	LXEJ02011196	9453	23247	+	100	49.73
NM_001033385.3	544696	Eve2	LXEJ02008503	21272	99156	+	100	33.22
NM_001033385.3	544696	Eve2	LXEJ02009513	2767	92557	-	100	16.86
NM_028887.3	74355	Eve2	LXEJ02007442	1804	90088	-	100	56.47
NM_028887.3	74355	Eve2	LXEJ02011543	2027917	2064884	-	100	43.51
NM_178756.4	272031	Eve2	LXEJ02007734	23484	26096	-	99.19	69.37
NM_178756.4	272031	Eve2	LXEJ02005349	8687	49980	-	99.6	20.2
NM_001033782.3	434172	Eve2	LXEJ02007758	1	3810	-	99.59	32.73
NM_001099318.1	100039948	Eve2	LXEJ02008170	698	2942	-	99.45	71.11
NM_001099318.1	100039948	Eve2	LXEJ02010050	16181	18700	-	99.26	34.91
NM_001099316.1	100039913	Eve2	LXEJ02008170	698	2920	-	99.43	69.9
NM_001099316.1	100039913	Eve2	LXEJ02010050	16177	18700	-	100	36.26
NM_007754.2	12874	Eve2	LXEJ02004834	11399	49619	+	99.98	88.75
NM_007754.2	12874	Eve2	LXEJ02008651	14197	14983	+	100	8.59
NM_001083945.1	100037282	Eve2	LXEJ02008945	8800	18173	+	99.91	71
NM_001083945.1	100037282	Eve2	LXEJ02011517	634	7321	-	100	28.93
NM_054053.4	110789	Eve2	LXEJ02003471	4172	116521	+	100	59.41
NM_054053.4	110789	Eve2	LXEJ02000202	1054984	1430892	-	100	35.89
NM_054053.4	110789	Eve2	LXEJ02008297	84289	124875	+	100	2.92
NM_011076.2	18671	Eve2	LXEJ02007580	4327	39927	+	100	62.86
NM_011076.2	18671	Eve2	LXEJ02003128	1234	44098	+	100	37.19
NM_010002.3	13097	Eve2	LXEJ02008896	18845	21658	-	100	17.53
NM_010002.3	13097	Eve2	LXEJ02008720	6574	14099	-	96.41	13.48
NM_026430.3	67883	Eve2	LXEJ02011267	517374	542020	-	100	55.58
NM_026430.3	67883	Eve2	LXEJ02001207	20769	68405	+	100	44.57
NM_053011.2	94217	Eve2	LXEJ02010272	2923	129553	+	99.93	21.86
NM_053011.2	94217	Eve2	LXEJ02004373	17650	762167	-	99.61	34.83
NM_053011.2	94217	Eve2	LXEJ02010006	22741	625358	+	99.16	37.88
NM_053011.2	94217	Eve2	LXEJ02004101	1567207	1934988	+	97.42	7.58
NM_008166.2	14803	Eve2	LXEJ02000827	847791	1054604	+	100	23.77
NM_008166.2	14803	Eve2	LXEJ02001461	8411	16599	+	100	22.26
NM_008166.2	14803	Eve2	LXEJ02006674	73726	87930	-	100	13.2
NM_008166.2	14803	Eve2	LXEJ02004418	26137	49174	+	98.84	35.41
NM_001099635.1	17883	Eve2	LXEJ02009164	19961	29114	-	100	50.48
NM_001099635.1	17883	Eve2	LXEJ02007862	363727	378000	+	100	49.58
NM_175256.5	77446	Eve2	LXEJ02000200	813184	870971	-	100	91.84
NM_008032.3	14266	Eve2	LXEJ02007411	54526	83207	+	99.7	22.8
NM_008032.3	14266	Eve2	LXEJ02012468	6345	521406	-	99.1	82.5
NM_009145.2	20320	Eve2	LXEJ02004845	2602102	2646714	+	99.19	89.55
NM_009145.2	20320	Eve2	LXEJ02010213	23054	23340	+	100	13.81
NM_008858.3	18760	Eve2	LXEJ02006492	12007	65811	+	100	74.48
NM_008858.3	18760	Eve2	LXEJ02003279	18416	242371	-	100	24.88
NM_026825.3	68732	Eve2	LXEJ02007285	747052	992364	+	100	72.6
NM_026825.3	68732	Eve2	LXEJ02008583	3517	16968	+	100	27.39
NM_145559.2	117591	Eve2	LXEJ02008743	3569447	3728287	+	99.96	94.96
NM_001012363.2	117591	Eve2	LXEJ02008743	3624470	3728287	+	99.96	95.15
NM_001102414.1	117591	Eve2	LXEJ02008743	3624470	3728287	+	99.96	89.89
NM_001102414.1	117591	Eve2	LXEJ02007133	5957	8865	+	100	10.18
NM_001102415.1	117591	Eve2	LXEJ02008743	3624470	3728287	+	99.96	88.9
NM_001102415.1	117591	Eve2	LXEJ02007133	5957	8865	+	100	11.18
NM_172595.4	218639	Eve2	LXEJ02005052	106144	108901	+	100	82.05
NM_172595.4	218639	Eve2	LXEJ02006181	3545021	3741918	+	99.08	19.37
NM_001102468.1	75600	Eve2	LXEJ02003945	6792	11441	+	100	87.63
NM_001098528.2	98741	Eve2	LXEJ02003186	21414	26145	-	100	89.13
NM_001098528.2	98741	Eve2	LXEJ02002597	49801	64526	+	98.24	11.75
NM_001085376.2	23850	Eve2	LXEJ02005667	385680	545483	-	100	76.79
NM_001085376.2	23850	Eve2	LXEJ02001808	67739	115748	+	99.27	24.04
NM_133649.2	107723	Eve2	LXEJ02000264	50995	97903	-	100	88.24
NM_133649.2	107723	Eve2	LXEJ02004649	18849	49532	-	97	13.51
NM_026458.4	67928	Eve2	LXEJ02004105	2529	93144	-	99.92	76.72
NM_026458.4	67928	Eve2	LXEJ02012485	13016	26209	+	100	23.43
NM_001103181.1	68842	Eve2	LXEJ02009987	44511	55634	-	99.47	79.5
NM_001103181.1	68842	Eve2	LXEJ02011848	5629	15904	-	99.81	5.95
NM_054040.3	68842	Eve2	LXEJ02009987	44511	55634	-	99.47	72.59
NM_054040.3	68842	Eve2	LXEJ02011848	5629	15904	-	99.81	5.43
NM_009135.2	20272	Eve2	LXEJ02005905	242472	364514	-	99.88	93.57
NM_001103199.1	230622	Eve2	LXEJ02012106	6654	116454	+	99.85	18.27
NM_001103199.1	230622	Eve2	LXEJ02002628	25698	27854	-	99.22	16.76
NM_001103199.1	230622	Eve2	LXEJ02002746	8202	38771	+	99.08	8.57
NM_001103199.1	230622	Eve2	LXEJ02002596	1629777	2587998	-	97.46	55.57
NM_001103366.1	625131	Eve2	LXEJ02007930	10663	18837	+	100	92.14
NM_001104540.1	665210	Eve2	LXEJ02011935	17667	22434	+	99.79	55.81
NM_001104540.1	665210	Eve2	LXEJ02010994	8844	9768	+	100	35.97
NM_001104541.1	627111	Eve2	LXEJ02007417	12429	31002	+	99.74	92.1
NM_001104549.1	627367	Eve2	LXEJ02003119	7527	23638	-	99.93	59.39
NM_001104549.1	627367	Eve2	LXEJ02008951	1704349	1712272	+	99.9	40.75
NM_001104578.1	434701	Eve2	LXEJ02003064	24579	29586	+	100	59.39
NM_001104578.1	434701	Eve2	LXEJ02000152	4376	7477	+	98.37	40.68
NM_001104582.1	383258	Eve2	LXEJ02006729	917694	934378	+	100	64.67
NM_001104582.1	383258	Eve2	LXEJ02010860	12254	13164	-	99.89	35.55
NM_001104615.1	637053	Eve2	LXEJ02002432	5608	17303	-	99.92	55.55
NM_001104615.1	637053	Eve2	LXEJ02004219	33159	34143	-	100	39.65
NM_001104619.1	667069	Eve2	LXEJ02003749	1	21886	-	99.67	87.27
NM_001104619.1	667069	Eve2	LXEJ02006904	27076	27409	-	98.21	13.36
NM_175674.3	319217	Eve2	LXEJ02003177	11949	14396	-	100	44.56
NM_175674.3	319217	Eve2	LXEJ02012481	1271	1548	-	100	11.19
NM_001104624.1	231589	Eve2	LXEJ02012295	6394	26903	-	100	60.65
NM_001104628.1	384221	Eve2	LXEJ02000858	4698	19073	-	100	64.39
NM_001104628.1	384221	Eve2	LXEJ02009805	3470766	3471676	+	100	35.72
NM_001104634.1	667180	Eve2	LXEJ02002070	4239	15540	+	100	48.55
NM_001104634.1	667180	Eve2	LXEJ02012116	69580	71207	+	100	20.02
NM_001104637.1	546913	Eve2	LXEJ02008363	5997	6894	+	99.88	35.05
NM_001104637.1	546913	Eve2	LXEJ02012116	69580	71207	+	97.85	20.02
NM_001104642.1	232367	Eve2	LXEJ02009604	20259	28366	+	100	51.28
NM_001104642.1	232367	Eve2	LXEJ02003188	44637	53765	-	100	48.79
NM_001104644.1	637908	Eve2	LXEJ02011197	3987	12132	-	100	54.6
NM_001104644.1	637908	Eve2	LXEJ02007264	4191	7547	+	100	45.47
NM_001081449.2	666085	Eve2	LXEJ02009678	4552	18647	-	100	59.64
NM_001081449.2	666085	Eve2	LXEJ02011197	20820	27739	-	99.9	45.43
NM_001104645.1	100042499	Eve2	LXEJ02002199	343645	363133	-	99.9	88.15
NM_001104648.1	629079	Eve2	LXEJ02009503	7789	29817	+	100	87.94
NM_001104648.1	629079	Eve2	LXEJ02006649	22382	22675	+	99.31	12.56
NM_177764.4	269902	Eve2	LXEJ02006119	87634	116723	-	100	91.93
NM_001104927.1	665095	Eve2	LXEJ02002120	337829	374743	+	99.66	79.6
NM_001104927.1	665095	Eve2	LXEJ02001887	139659	157516	-	94.71	28.55
NM_001105055.1	628422	Eve2	LXEJ02012138	5152	17337	-	99.82	64.38
NM_001105055.1	628422	Eve2	LXEJ02003342	11892	12853	-	98.25	37.15
NM_009490.3	22306	Eve2	LXEJ02012371	13313	26646	-	99.85	80.89
NM_009490.3	22306	Eve2	LXEJ02003717	5559	8899	-	99.18	19.1
NM_001105062.1	100042591	Eve2	LXEJ02012150	7767	23296	-	99.33	93
NM_001105066.1	100042636	Eve2	LXEJ02000094	7564	19872	-	99.8	80.81
NM_001105067.1	625353	Eve2	LXEJ02000130	4067	11312	+	98.95	59.12
NM_001105067.1	625353	Eve2	LXEJ02005444	3578	10526	+	99.08	42.18
NM_001105068.1	100042653	Eve2	LXEJ02003661	977	18830	-	99.93	56.89
NM_001105068.1	100042653	Eve2	LXEJ02005764	16593	21506	-	98.73	40.28
NM_001105074.1	434113	Eve2	LXEJ02012150	7767	23296	-	99.37	93
NM_001105075.1	100042810	Eve2	LXEJ02011792	23761	31466	+	99.21	59.86
NM_001105075.1	100042810	Eve2	LXEJ02005764	16593	21506	-	97.18	40.28
NM_001105151.1	100042891	Eve2	LXEJ02006429	2870	22593	-	99.93	64.63
NM_001105151.1	100042891	Eve2	LXEJ02005764	16593	21506	-	100	40.28
NM_001101588.1	631304	Eve2	LXEJ02008424	92547	95100	-	99.84	41.88
NM_001101588.1	631304	Eve2	LXEJ02005509	104257	116100	+	97.34	60.89
NM_001105180.1	100009609	Eve2	LXEJ02001331	10885	18367	+	100	92.35
NM_028135.2	72160	Eve2	LXEJ02005195	4778	67236	+	100	71.75
NM_028135.2	72160	Eve2	LXEJ02012359	69438	78806	-	100	28.24
NM_173004.3	269784	Eve2	LXEJ02010152	33744	270020	+	100	70.61
NM_173004.3	269784	Eve2	LXEJ02009647	54096	730053	+	100	29.17
NM_001109749.1	269784	Eve2	LXEJ02010152	33744	295055	+	100	83.75
NM_001109749.1	269784	Eve2	LXEJ02009647	54096	730053	+	100	16.24
NM_001109751.1	269784	Eve2	LXEJ02010152	33744	270020	+	100	68.54
NM_001109751.1	269784	Eve2	LXEJ02009647	495080	730053	+	100	31.23
NM_172400.3	68598	Eve2	LXEJ02010631	357536	390021	-	99.83	43.12
NM_001081011.2	14270	Eve2	LXEJ02008841	114716	379809	+	99.34	81.62
NM_001081011.2	14270	Eve2	LXEJ02009184	10023	63616	+	99.82	20.95
NM_009819.2	12386	Eve2	LXEJ02009106	27212	751062	-	99.93	72.69
NM_009819.2	12386	Eve2	LXEJ02007850	32410	62975	+	99.65	14.21
NM_009819.2	12386	Eve2	LXEJ02002314	37177	279762	-	97.11	16.11
NM_145732.2	12386	Eve2	LXEJ02009106	27212	751062	-	99.92	69.84
NM_145732.2	12386	Eve2	LXEJ02007850	46485	62975	+	99.82	13.93
NM_145732.2	12386	Eve2	LXEJ02002314	37177	279762	-	97.5	18.83
NM_001109764.1	12386	Eve2	LXEJ02009106	27212	751062	-	99.93	70.89
NM_001109764.1	12386	Eve2	LXEJ02007850	46485	62975	+	99.82	13.45
NM_001109764.1	12386	Eve2	LXEJ02002314	37177	279762	-	97.5	18.17
NM_001101488.1	269994	Eve2	LXEJ02006208	129550	161467	-	100	77.95
NM_001101488.1	269994	Eve2	LXEJ02004832	536	173026	-	99.9	26.35
NM_177278.5	320858	Eve2	LXEJ02004851	51838	84487	+	99.42	56.38
NM_177278.5	320858	Eve2	LXEJ02007394	29213	122943	+	99.45	20.17
NM_177278.5	320858	Eve2	LXEJ02010164	13250	129292	-	96.66	12.34
NM_177278.5	320858	Eve2	LXEJ02009095	36927	79829	-	96.84	12.95
NM_001100609.1	100039467	Eve2	LXEJ02012108	13610	29166	-	99.84	71.55
NM_001100609.1	100039467	Eve2	LXEJ02004975	941717	943419	-	100	28.66
NM_001109970.1	100039550	Eve2	LXEJ02012108	13593	29166	-	100	72.07
NM_001109970.1	100039550	Eve2	LXEJ02004975	941717	943419	-	100	28.13
NM_030692.4	83493	Eve2	LXEJ02000930	713	16333	+	99.96	73.02
NM_030692.4	83493	Eve2	LXEJ02005101	819874	860557	+	100	27.11
NM_001100466.1	639774	Eve2	LXEJ02011248	2256	15777	+	100	63.98
NM_001100466.1	639774	Eve2	LXEJ02009566	2832	12074	-	98.55	37.65
NM_019827.6	56637	Eve2	LXEJ02004912	4015	9594	+	99.94	67.23
NM_011766.5	22762	Eve2	LXEJ02011996	68755	218654	+	100	81.46
NM_011766.5	22762	Eve2	LXEJ02006374	15241	230841	-	99.89	18.51
NM_153546.4	218121	Eve2	LXEJ02003207	3716	56031	+	100	90.62
NM_001033479.4	385263	Eve2	LXEJ02011371	34811	47178	-	99.85	66.69
NM_177350.5	235379	Eve2	LXEJ02003036	18216	47101	+	100	91.37
NM_177350.5	235379	Eve2	LXEJ02010074	156762	157162	+	100	8.62
NM_033652.5	110648	Eve2	LXEJ02005150	3065	7167	+	100	69.05
NM_033652.5	110648	Eve2	LXEJ02005159	485834	598045	+	99.6	22.79
NM_027341.2	224170	Eve2	LXEJ02010265	45627	82634	-	99.9	78.98
NM_027341.2	224170	Eve2	LXEJ02000655	4204	26095	-	100	21.19
NM_001110017.1	224170	Eve2	LXEJ02010265	45627	82634	-	99.91	81.23
NM_001110017.1	224170	Eve2	LXEJ02000655	7405	26095	-	100	16.91
NM_177595.4	210719	Eve2	LXEJ02003257	64637	66884	-	99.71	66.69
NM_177595.4	210719	Eve2	LXEJ02007903	1823	14593	-	98.56	34.58
NM_030595.1	26422	Eve2	LXEJ02009806	795680	1043971	-	99.93	42.95
NM_030595.1	26422	Eve2	LXEJ02010641	10198	138052	-	99.97	31.86
NM_030595.1	26422	Eve2	LXEJ02007524	5334	16596	-	100	8.6
NM_030595.1	26422	Eve2	LXEJ02006996	16408	45369	+	99.46	10.11
NM_030595.1	26422	Eve2	LXEJ02008650	29269	64220	+	96.95	7.67
NM_008168.2	14809	Eve2	LXEJ02002326	419571	488010	-	100	94.71
NM_014194.5	16638	Eve2	LXEJ02011278	2300	9902	-	100	68.65
NM_014194.5	16638	Eve2	LXEJ02002993	15732	16162	-	100	31.34
NM_001110323.1	16638	Eve2	LXEJ02011278	2300	11537	-	100	80.32
NM_181815.3	75216	Eve2	LXEJ02011240	63505	158507	+	100	34.66
NM_181815.3	75216	Eve2	LXEJ02006538	32227	117461	-	100	32.01
NM_181815.3	75216	Eve2	LXEJ02006629	10503	22030	+	99.49	24.53
NM_181815.3	75216	Eve2	LXEJ02011588	5471	52281	+	94.56	11.5
NM_001101433.1	71918	Eve2	LXEJ02005476	2259110	2267263	-	100	89.85
NM_001101433.1	71918	Eve2	LXEJ02002310	20062	32210	-	98.53	10.88
NM_001008420.2	215654	Eve2	LXEJ02007437	582053	1063216	+	99.72	96.27
NM_013838.2	22068	Eve2	LXEJ02002087	206	82829	-	99.92	43.38
NM_013838.2	22068	Eve2	LXEJ02011204	6196	33416	-	99.42	42.52
NM_013838.2	22068	Eve2	LXEJ02010023	99502	100775	-	100	12.39
NM_027260.3	69922	Eve2	LXEJ02011728	5593	84267	+	99.92	75.31
NM_027260.3	69922	Eve2	LXEJ02012657	79015	81350	+	99.78	24.86
NM_001101519.1	403185	Eve2	LXEJ02012278	18629	26866	+	100	78.74
NM_001101519.1	403185	Eve2	LXEJ02003806	1792235	1792404	+	100	21.76
NM_032465.2	84544	Eve2	LXEJ02000209	922467	958638	-	100	56.35
NM_032465.2	84544	Eve2	LXEJ02005573	11587	37095	-	100	43.3
NM_008312.4	15560	Eve2	LXEJ02010166	12641	58343	-	99.57	79.76
NM_008312.4	15560	Eve2	LXEJ02001603	52617	196650	+	97.72	24.74
NM_016780.2	16416	Eve2	LXEJ02002476	3748	15507	+	99.9	69.43
NM_016780.2	16416	Eve2	LXEJ02000010	365	40975	-	99.56	31.4
NM_001110784.1	22445	Eve2	LXEJ02010131	709	8671	+	100	85.79
NM_011995.4	26875	Eve2	LXEJ02004818	185530	397726	+	99.85	83.62
NM_011995.4	26875	Eve2	LXEJ02010918	1160	32969	-	99.45	17.33
NM_008746.5	18213	Eve2	LXEJ02001383	62125	226775	+	100	51.3
NM_008746.5	18213	Eve2	LXEJ02002498	3040	156641	-	98.19	53.59
NM_182809.2	18213	Eve2	LXEJ02001383	62125	117652	+	100	62.17
NM_182809.2	18213	Eve2	LXEJ02002498	29696	156641	-	100	37.76
NM_027618.1	70952	Eve2	LXEJ02006595	122392	138527	+	99.73	66.76
NM_027618.1	70952	Eve2	LXEJ02012039	8782	16948	+	100	15.18
NM_027618.1	70952	Eve2	LXEJ02000077	14839	15155	-	100	18.58
NM_016704.2	12274	Eve2	LXEJ02004325	48578	70787	-	100	54.52
NM_016704.2	12274	Eve2	LXEJ02010972	5469	41842	-	99.92	45.4
NM_009784.2	12293	Eve2	LXEJ02004818	1637231	2121534	+	99.82	93.12
NM_009784.2	12293	Eve2	LXEJ02010051	15761	88478	-	99.62	7.1
NM_001110843.1	12293	Eve2	LXEJ02004818	1637231	2121534	+	99.82	93.17
NM_001110843.1	12293	Eve2	LXEJ02010051	15761	88478	-	99.62	7.05
NM_001110844.1	12293	Eve2	LXEJ02004818	1637231	2121534	+	99.82	93.14
NM_001110844.1	12293	Eve2	LXEJ02010051	15761	88478	-	99.62	7.08
NM_001110845.1	12293	Eve2	LXEJ02004818	1637231	2121534	+	99.82	93.12
NM_001110845.1	12293	Eve2	LXEJ02010051	15761	88478	-	99.62	7.1
NM_001110846.1	12293	Eve2	LXEJ02004818	1637231	2121534	+	99.82	93.1
NM_001110846.1	12293	Eve2	LXEJ02010051	15761	88478	-	99.62	7.12
NM_009793.3	12326	Eve2	LXEJ02004730	110811	230270	-	99.96	95.92
NM_009793.3	12326	Eve2	LXEJ02006911	180865	181369	+	100	4.09
NM_139148.2	229927	Eve2	LXEJ02007627	3934542	3947275	+	100	45.16
NM_139148.2	229927	Eve2	LXEJ02002647	1420	6908	+	100	53.29
NM_001081391.2	239420	Eve2	LXEJ02012362	25901	467090	-	99.99	84.21
NM_001081391.2	239420	Eve2	LXEJ02000717	40386	107020	+	100	3.87
NM_001081391.2	239420	Eve2	LXEJ02001477	27982	132085	-	99.37	3.67
NM_001081391.2	239420	Eve2	LXEJ02007987	93046	471614	+	97.18	7.02
NM_001099325.2	100042109	Eve2	LXEJ02012108	13612	29166	-	99.84	74.02
NM_001099325.2	100042109	Eve2	LXEJ02004975	941717	943388	-	100	25.38
NM_010747.2	17096	Eve2	LXEJ02005831	2393	37708	+	99.83	71.52
NM_010747.2	17096	Eve2	LXEJ02011318	7200	26384	-	98.9	29.47
NM_001111096.1	17096	Eve2	LXEJ02005831	2393	37708	+	99.83	70.22
NM_001111096.1	17096	Eve2	LXEJ02011318	7200	26384	-	98.87	30.75
NM_001101486.1	245884	Eve2	LXEJ02010503	631796	638037	+	99.87	68.82
NM_028892.4	74362	Eve2	LXEJ02007601	187443	281631	-	99.94	66.84
NM_028892.4	74362	Eve2	LXEJ02009979	32383	131856	+	99.51	31.73
NM_001081050.2	72823	Eve2	LXEJ02000245	34900	110100	-	99.59	58.36
NM_001081050.2	72823	Eve2	LXEJ02012458	6311	195158	-	100	11.82
NM_001081050.2	72823	Eve2	LXEJ02001269	37573	177438	+	99.21	21.13
NM_001081050.2	72823	Eve2	LXEJ02003096	53909	77938	+	98.86	7.31
NM_177698.4	234353	Eve2	LXEJ02003741	18889	88071	+	99.98	77.95
NM_177698.4	234353	Eve2	LXEJ02000833	14814	198476	-	100	22.03
NM_030263.5	234353	Eve2	LXEJ02003741	18889	88071	+	99.98	92.34
NM_030263.5	234353	Eve2	LXEJ02000833	14814	134853	-	100	7.66
NM_027626.1	234353	Eve2	LXEJ02003741	18892	88071	+	100	95.74
NM_027626.1	234353	Eve2	LXEJ02000833	14814	42209	-	100	4.24
NM_010349.2	14806	Eve2	LXEJ02002782	268013	968492	-	99.13	92.61
NM_001111268.1	14806	Eve2	LXEJ02002782	268013	968492	-	99.12	92.47
NM_146072.4	14805	Eve2	LXEJ02009450	596394	1010157	-	99.46	87.15
NM_146072.4	14805	Eve2	LXEJ02007973	9206	31224	-	99.02	16.74
NM_010348.3	14805	Eve2	LXEJ02009450	596394	1010157	-	99.45	86.84
NM_010348.3	14805	Eve2	LXEJ02007973	9206	31224	-	99.02	17.15
NM_019691.4	14802	Eve2	LXEJ02010634	1299870	1546996	-	99.95	86.76
NM_019691.4	14802	Eve2	LXEJ02005367	47706	50130	+	100	13.3
NM_001113180.1	14802	Eve2	LXEJ02010634	1299870	1546996	-	99.95	86.76
NM_001113180.1	14802	Eve2	LXEJ02005367	47706	50130	+	100	13.3
NM_001113181.1	14802	Eve2	LXEJ02010634	1360190	1546996	-	99.93	69.16
NM_001113181.1	14802	Eve2	LXEJ02005367	47706	50130	+	100	31.05
NM_207216.2	105887	Eve2	LXEJ02010219	9260	20802	+	99.78	82.17
NM_207216.2	105887	Eve2	LXEJ02005474	1989939	2002202	-	100	19.33
NM_028450.3	70676	Eve2	LXEJ02003097	25635	77995	+	99.88	88.97
NM_027442.5	70503	Eve2	LXEJ02002889	667459	704767	-	99.94	60.23
NM_178723.6	241494	Eve2	LXEJ02005174	188148	281203	-	99.91	76.71
NM_178723.6	241494	Eve2	LXEJ02007866	134805	232181	+	98.58	23.9
NM_001113420.1	30953	Eve2	LXEJ02001679	101015	131343	-	100	86.51
NM_001113421.1	30953	Eve2	LXEJ02002319	25091	470524	-	99.88	40.24
NM_001113421.1	30953	Eve2	LXEJ02001679	101015	140206	-	99.63	61.37
NM_010103.4	13612	Eve2	LXEJ02011059	2031746	2542786	-	99.64	84.62
NM_001037987.3	13612	Eve2	LXEJ02011059	2031746	2542786	-	99.39	85.64
NM_011648.5	22095	Eve2	LXEJ02000542	2911007	2958245	-	100	93.92
NM_011648.5	22095	Eve2	LXEJ02011240	44219	46924	-	98.28	6.67
NM_001113404.1	22095	Eve2	LXEJ02000542	2928973	2958245	-	100	80.53
NM_001113404.1	22095	Eve2	LXEJ02011240	11879	46924	-	94.3	27.11
NM_178611.6	52855	Eve2	LXEJ02011226	7245	11019	+	100	94.62
NM_001113474.1	52855	Eve2	LXEJ02011226	7241	11019	+	99.96	85.84
NM_013661.2	20357	Eve2	LXEJ02000387	511822	530363	-	100	85.68
NM_013661.2	20357	Eve2	LXEJ02004508	132	104882	-	99.6	16.54
NM_001113468.1	76229	Eve2	LXEJ02004362	1184	8552	-	99.93	59.78
NM_001113468.1	76229	Eve2	LXEJ02006796	14328	24253	-	99.51	40.28
NM_001004357.2	66797	Eve2	LXEJ02010493	957873	1936989	-	99.78	71.47
NM_001004357.2	66797	Eve2	LXEJ02002766	13192	85209	+	99.68	4.51
NM_020587.2	57317	Eve2	LXEJ02010631	1023808	1034325	-	99.95	89.66
NM_025789.5	66832	Eve2	LXEJ02008945	8800	18208	+	99.91	60.25
NM_025789.5	66832	Eve2	LXEJ02002219	32888	33577	+	100	35.2
NM_026067.3	67276	Eve2	LXEJ02007431	1995323	2012788	-	99.97	91.37
NM_025599.3	66497	Eve2	LXEJ02005113	263157	284703	+	100	83
NM_172544.3	18191	Eve2	LXEJ02000210	60544	257261	+	99.42	55.64
NM_172544.3	18191	Eve2	LXEJ02006179	628299	1708956	+	99.08	48.61
NM_011516.2	20957	Eve2	LXEJ02007184	8992	49235	-	100	51.41
NM_011516.2	20957	Eve2	LXEJ02003826	6498	8689	-	99.85	20.45
NM_011516.2	20957	Eve2	LXEJ02011321	3167	18109	-	98.8	19.43
NM_011544.3	21406	Eve2	LXEJ02004846	20870	120638	+	99.97	87.57
NM_011544.3	21406	Eve2	LXEJ02005670	1117064	1228466	+	99.83	12.64
NM_001114157.1	434758	Eve2	LXEJ02002059	69666	79232	+	100	77.58
NM_183087.4	70638	Eve2	LXEJ02006315	5236	69044	+	99.88	87.71
NM_183087.4	70638	Eve2	LXEJ02007638	586549	900113	+	98.5	11.1
NM_029760.2	76826	Eve2	LXEJ02011991	2405314	2445235	-	100	53.98
NM_029760.2	76826	Eve2	LXEJ02005391	12573	15328	+	100	26.74
NM_001114383.1	434865	Eve2	LXEJ02004588	2928	25514	+	99.68	62.07
NM_001114383.1	434865	Eve2	LXEJ02010869	3842	12173	+	98.57	38.07
NM_031389.2	83564	Eve2	LXEJ02003210	954	13708	-	99.77	62.17
NM_031389.2	83564	Eve2	LXEJ02001392	5124	25731	+	99.92	36.3
NM_172440.3	207227	Eve2	LXEJ02003293	134755	143499	-	99.98	71.37
NM_172440.3	207227	Eve2	LXEJ02003272	868647	1131889	+	99.71	28.79
NM_001114611.1	207227	Eve2	LXEJ02003293	134755	143499	-	99.98	72.84
NM_001114611.1	207227	Eve2	LXEJ02003272	868647	1131889	+	99.69	27.33
NM_001114612.1	207227	Eve2	LXEJ02003293	134755	143499	-	99.98	71.8
NM_001114612.1	207227	Eve2	LXEJ02003272	868647	1131889	+	99.7	28.36
NM_001114613.1	207227	Eve2	LXEJ02003293	134755	143499	-	99.98	72.4
NM_001114613.1	207227	Eve2	LXEJ02003272	868647	1131889	+	99.69	27.77
NM_001109969.2	100039240	Eve2	LXEJ02012108	13597	29166	-	100	74.46
NM_001109969.2	100039240	Eve2	LXEJ02004975	941717	943388	-	100	25.75
NM_001114663.1	227120	Eve2	LXEJ02003807	350831	409380	-	99.98	89.53
NM_001114663.1	227120	Eve2	LXEJ02007554	37968	70606	-	97.9	11.63
NM_019457.2	54562	Eve2	LXEJ02005109	3888	80868	+	99.93	73.7
NM_019457.2	54562	Eve2	LXEJ02004134	155083	186178	+	100	26.63
NM_001101534.1	434121	Eve2	LXEJ02002138	15422	37510	-	100	51.45
NM_001101534.1	434121	Eve2	LXEJ02008928	19881	47434	-	99	52.07
NM_007525.3	12021	Eve2	LXEJ02012084	5263	53210	+	99.95	90.74
NM_007525.3	12021	Eve2	LXEJ02002236	6902	20403	-	100	6.64
NM_001033532.3	225289	Eve2	LXEJ02008956	1251586	1319008	-	100	74.71
NM_001033532.3	225289	Eve2	LXEJ02005578	20554	75582	-	99.66	16.81
NM_001033532.3	225289	Eve2	LXEJ02010151	2537295	2582744	+	96.33	10.08
NM_177355.3	239318	Eve2	LXEJ02002790	8776	67748	-	100	83.17
NM_177355.3	239318	Eve2	LXEJ02012289	40723	41048	-	100	17.11
NM_001122603.1	215384	Eve2	LXEJ02008327	1	26085	+	100	54.52
NM_001122603.1	215384	Eve2	LXEJ02002076	6267	18533	+	100	41.13
NM_001122603.1	215384	Eve2	LXEJ02003496	40855	45028	-	99.76	5.35
NM_175642.4	210933	Eve2	LXEJ02003636	159769	327691	+	100	50.36
NM_175642.4	210933	Eve2	LXEJ02012265	21480	105950	+	100	16.58
NM_175642.4	210933	Eve2	LXEJ02007745	34972	62970	+	100	13.94
NM_175642.4	210933	Eve2	LXEJ02004571	126396	162564	-	97.02	21.16
NM_027886.3	71728	Eve2	LXEJ02005274	808352	819467	+	100	54.62
NM_027886.3	71728	Eve2	LXEJ02003408	169948	174637	-	99.95	45.15
NM_001122735.1	382244	Eve2	LXEJ02004588	2928	25514	+	99.2	62.04
NM_001122735.1	382244	Eve2	LXEJ02010869	3842	12173	+	99.35	38.1
NM_194336.2	100702	Eve2	LXEJ02010730	690	19000	+	99.67	93.76
NM_029270.2	231532	Eve2	LXEJ02003840	41925	283311	-	99.85	81.11
NM_029270.2	231532	Eve2	LXEJ02002824	36244	112275	+	98.43	20.93
NM_026840.3	68797	Eve2	LXEJ02004731	174267	188098	-	100	68.22
NM_026840.3	68797	Eve2	LXEJ02004167	83632	95795	+	100	31.77
NM_033620.2	93742	Eve2	LXEJ02011426	2294	371577	+	99.77	91.87
NM_033620.2	93742	Eve2	LXEJ02004901	76682	174276	-	99.8	8.97
NM_001122850.1	93742	Eve2	LXEJ02011426	2294	161371	+	99.67	88.7
NM_001122850.1	93742	Eve2	LXEJ02004901	76682	174276	-	99.8	12.51
NM_176996.4	319757	Eve2	LXEJ02004924	5902	13801	+	99.96	78.52
NM_176996.4	319757	Eve2	LXEJ02004983	11401	12256	-	99.76	21.52
NM_010433.2	15258	Eve2	LXEJ02007436	421358	445118	-	100	41.69
NM_010433.2	15258	Eve2	LXEJ02012467	2965	149228	-	100	58.34
NM_145841.2	244431	Eve2	LXEJ02007476	38796	55949	-	99.9	46.12
NM_145841.2	244431	Eve2	LXEJ02010157	118942	119727	+	99.87	32.9
NM_010917.2	18073	Eve2	LXEJ02000840	3017168	3065712	+	99.98	94.62
NM_010917.2	18073	Eve2	LXEJ02002485	23221	23549	-	99.39	5.44
NM_146146.2	16847	Eve2	LXEJ02008852	2483297	2518091	-	100	37.32
NM_146146.2	16847	Eve2	LXEJ02003880	8435	35696	+	99.12	41.29
NM_146146.2	16847	Eve2	LXEJ02010992	47178	48094	-	99.56	22.22
NM_001122899.1	16847	Eve2	LXEJ02008852	2483297	2518091	-	100	27.64
NM_001122899.1	16847	Eve2	LXEJ02003880	8435	35698	+	98.95	30.67
NM_001122899.1	16847	Eve2	LXEJ02010992	48865	51189	-	99.95	41.97
NM_010704.2	16847	Eve2	LXEJ02008852	2483297	2518091	-	100	45.2
NM_010704.2	16847	Eve2	LXEJ02003880	8435	35858	+	100	54.85
NM_008580.4	26408	Eve2	LXEJ02004848	1509472	1651637	-	99.97	89.8
NM_008580.4	26408	Eve2	LXEJ02002151	154707	167784	+	99.3	10.62
NM_027487.1	67282	Eve2	LXEJ02007087	2818050	2841594	-	99.72	79.36
NM_026070.3	67282	Eve2	LXEJ02007087	2797258	2841594	-	99.76	82.06
NM_001122960.1	67282	Eve2	LXEJ02007087	2797258	2841594	-	99.76	82
NM_207667.3	14169	Eve2	LXEJ02011998	1239083	1397082	-	99.96	80.92
NM_207667.3	14169	Eve2	LXEJ02004870	7734	19872	-	98.5	20.59
NM_001123370.1	100041574	Eve2	LXEJ02011616	11162	17922	-	99.68	74.71
NM_010130.4	13733	Eve2	LXEJ02007967	8268	50538	+	100	54.05
NM_010130.4	13733	Eve2	LXEJ02006878	570	18071	-	100	36.42
NM_029525.1	109294	Eve2	LXEJ02005081	311583	349587	-	100	57.96
NM_029525.1	109294	Eve2	LXEJ02006541	5202	262576	-	99.83	42.73
NM_001039555.2	433247	Eve2	LXEJ02009215	22064	28878	+	99.88	49.38
NM_001039555.2	433247	Eve2	LXEJ02005402	760	19574	+	99.1	44.03
NM_145467.2	223272	Eve2	LXEJ02003520	4795	21814	+	100	23.54
NM_145467.2	223272	Eve2	LXEJ02003556	45425	46794	+	100	20.61
NM_145467.2	223272	Eve2	LXEJ02011998	1193787	1234871	+	98.73	53.5
NM_021416.3	58227	Eve2	LXEJ02009879	115766	170799	-	100	90.12
NM_021416.3	58227	Eve2	LXEJ02001141	9863	40274	+	95.15	12.81
NM_178415.1	319845	Eve2	LXEJ02004933	28566	242162	-	99.72	73.9
NM_178415.1	319845	Eve2	LXEJ02009978	45326	46025	+	100	15.32
NM_178415.1	319845	Eve2	LXEJ02006797	65298	84093	+	100	11.95
NM_181316.4	319845	Eve2	LXEJ02004933	28566	242162	-	99.71	73.47
NM_181316.4	319845	Eve2	LXEJ02009978	45326	46025	+	100	15.58
NM_181316.4	319845	Eve2	LXEJ02006797	65298	84093	+	100	12.15
NM_001005418.1	13223	Eve2	LXEJ02006411	14865	15065	-	90.04	59.82
NM_172646.2	103967	Eve2	LXEJ02008027	37015	76624	+	99.68	55.09
NM_172646.2	103967	Eve2	LXEJ02012492	6324	53619	-	100	20.91
NM_172646.2	103967	Eve2	LXEJ02010606	11423	136021	+	99.75	17.53
NM_028848.3	74717	Eve2	LXEJ02007988	1116944	1234614	+	100	93.7
NM_177151.3	666173	Eve2	LXEJ02002804	1974209	2179141	-	99.64	54.94
NM_177151.3	666173	Eve2	LXEJ02012041	22167	181205	+	99.5	21.03
NM_177151.3	666173	Eve2	LXEJ02008520	9542	79530	+	99.03	15.48
NM_177151.3	666173	Eve2	LXEJ02001367	5425	31848	-	99.37	5.98
NM_177151.3	666173	Eve2	LXEJ02002682	906	11121	-	96.6	4.53
NM_023718.3	28254	Eve2	LXEJ02007295	2322	37737	+	99.24	75.24
NM_023718.3	28254	Eve2	LXEJ02000483	5498	35168	+	98.16	15.47
NM_001134299.1	434689	Eve2	LXEJ02009973	41638	47098	-	98.16	92.72
NM_001101620.1	16639	Eve2	LXEJ02003912	2781	10641	-	100	59.93
NM_001134743.1	243499	Eve2	LXEJ02005194	152117	153294	+	100	38.83
NM_001134743.1	243499	Eve2	LXEJ02009635	623235	651282	-	98.78	64.57
NM_053099.2	240427	Eve2	LXEJ02000764	2976	112521	+	99.98	91.13
NM_053099.2	240427	Eve2	LXEJ02000385	504475	690097	-	100	8.9
NM_027823.1	71544	Eve2	LXEJ02004174	205349	269578	-	99.97	88.6
NM_027823.1	71544	Eve2	LXEJ02003285	49701	173013	-	100	11.45
NM_029056.1	74691	Eve2	LXEJ02008195	8679	84141	-	100	79.06
NM_029056.1	74691	Eve2	LXEJ02008540	3456	11046	+	99.86	15.8
NM_001004176.2	433586	Eve2	LXEJ02000821	2133	172964	+	100	79.61
NM_001004176.2	433586	Eve2	LXEJ02011067	209483	245706	-	98.07	22.1
NM_028709.2	74007	Eve2	LXEJ02011082	49154	110721	-	100	65.13
NM_028709.2	74007	Eve2	LXEJ02004919	6390	30761	-	98.04	31.49
NM_028709.2	74007	Eve2	LXEJ02004433	130705	173245	+	95.23	8.29
NM_153589.2	243634	Eve2	LXEJ02007284	992945	1318681	+	100	74.34
NM_153589.2	243634	Eve2	LXEJ02007089	863412	866701	-	100	25.48
NM_001136260.1	54403	Eve2	LXEJ02004814	5350	122598	+	100	88.23
NM_001136260.1	54403	Eve2	LXEJ02004728	14348	225805	+	98.09	12.72
NM_183368.2	83672	Eve2	LXEJ02008945	184838	195103	-	100	66.55
NM_183368.2	83672	Eve2	LXEJ02004623	24060	33736	+	99.19	32.84
NM_031395.2	83672	Eve2	LXEJ02008945	184838	195103	-	100	43.37
NM_031395.2	83672	Eve2	LXEJ02004623	5515	33736	+	99.01	30.58
NM_031395.2	83672	Eve2	LXEJ02000192	18293	32466	+	100	29.07
NM_183370.2	83672	Eve2	LXEJ02008945	184838	195103	-	100	58.13
NM_183370.2	83672	Eve2	LXEJ02004623	7337	33736	+	99.71	41.34
NM_028797.1	74174	Eve2	LXEJ02004948	796404	803667	-	100	32.22
NM_028797.1	74174	Eve2	LXEJ02002321	230787	241266	+	98.61	67.97
NM_001136476.1	664829	Eve2	LXEJ02012108	13593	29166	-	98.64	72.07
NM_001136476.1	664829	Eve2	LXEJ02010843	812	8752	-	98.34	39.17
NM_001142539.1	667055	Eve2	LXEJ02010999	25	13438	+	99.49	86.37
NM_001142570.1	93837	Eve2	LXEJ02001516	32307	162689	+	100	84.59
NM_001142570.1	93837	Eve2	LXEJ02002156	20636	21315	+	100	11.35
NM_023115.3	11994	Eve2	LXEJ02000451	14779	74950	-	100	7.95
NM_023115.3	11994	Eve2	LXEJ02012020	5331	18896	+	100	53.19
NM_023115.3	11994	Eve2	LXEJ02010725	4048	55788	-	99.56	10.15
NM_023115.3	11994	Eve2	LXEJ02010566	11088	162112	+	98.97	18.21
NM_023115.3	11994	Eve2	LXEJ02002845	90790	320562	-	100	6.56
NM_023115.3	11994	Eve2	LXEJ02010715	12125	85144	+	97.95	5.35
NM_001142735.1	11994	Eve2	LXEJ02000451	14779	74950	-	100	7.96
NM_001142735.1	11994	Eve2	LXEJ02012020	5331	18896	+	100	53.28
NM_001142735.1	11994	Eve2	LXEJ02010725	4048	55788	-	99.56	10.16
NM_001142735.1	11994	Eve2	LXEJ02010566	11088	162112	+	98.97	18.24
NM_001142735.1	11994	Eve2	LXEJ02002845	90790	320562	-	100	6.4
NM_001142735.1	11994	Eve2	LXEJ02010715	12125	85144	+	97.95	5.35
NM_001142736.1	11994	Eve2	LXEJ02000451	14779	74950	-	100	7.97
NM_001142736.1	11994	Eve2	LXEJ02012020	5331	18896	+	100	53.25
NM_001142736.1	11994	Eve2	LXEJ02010725	4048	55788	-	99.56	10.17
NM_001142736.1	11994	Eve2	LXEJ02010566	11088	162112	+	99.38	17.96
NM_001142736.1	11994	Eve2	LXEJ02002845	90790	320562	-	100	6.41
NM_001142736.1	11994	Eve2	LXEJ02010715	12125	85144	+	97.95	5.36
NM_001142737.1	11994	Eve2	LXEJ02000451	14779	74950	-	100	8.15
NM_001142737.1	11994	Eve2	LXEJ02012020	5331	18896	+	100	54.57
NM_001142737.1	11994	Eve2	LXEJ02010725	4061	55788	-	100	10.27
NM_001142737.1	11994	Eve2	LXEJ02010566	11088	162112	+	98.97	18.68
NM_001142737.1	11994	Eve2	LXEJ02002845	90790	320562	-	100	6.56
NM_001142738.1	11994	Eve2	LXEJ02000451	14779	74950	-	100	6.83
NM_001142738.1	11994	Eve2	LXEJ02012020	5331	18896	+	100	53.87
NM_001142738.1	11994	Eve2	LXEJ02010725	4048	55788	-	99.56	10.31
NM_001142738.1	11994	Eve2	LXEJ02010566	11088	162112	+	99.38	18.21
NM_001142738.1	11994	Eve2	LXEJ02002845	90790	320562	-	100	6.5
NM_001142738.1	11994	Eve2	LXEJ02010715	12125	79841	+	94.44	6.32
NM_001142739.1	11994	Eve2	LXEJ02000451	14779	74950	-	100	8.02
NM_001142739.1	11994	Eve2	LXEJ02012020	5331	18896	+	100	53.67
NM_001142739.1	11994	Eve2	LXEJ02010725	4048	55788	-	99.56	10.24
NM_001142739.1	11994	Eve2	LXEJ02010566	11088	162112	+	98.97	18.37
NM_001142739.1	11994	Eve2	LXEJ02002845	195293	320562	-	100	5.73
NM_001142739.1	11994	Eve2	LXEJ02010715	12125	85144	+	97.95	5.39
NM_001142740.1	11994	Eve2	LXEJ02000451	14779	74950	-	100	7.98
NM_001142740.1	11994	Eve2	LXEJ02012020	5331	18896	+	100	53.21
NM_001142740.1	11994	Eve2	LXEJ02010725	4048	55788	-	99.56	10.18
NM_001142740.1	11994	Eve2	LXEJ02010566	11088	162112	+	99.38	17.98
NM_001142740.1	11994	Eve2	LXEJ02002845	90790	320562	-	100	6.42
NM_001142740.1	11994	Eve2	LXEJ02010715	12125	79841	+	94.44	6.24
NM_001142741.1	11994	Eve2	LXEJ02000451	14779	74950	-	100	8.03
NM_001142741.1	11994	Eve2	LXEJ02012020	5331	18896	+	100	53.63
NM_001142741.1	11994	Eve2	LXEJ02010725	4048	55788	-	99.56	10.25
NM_001142741.1	11994	Eve2	LXEJ02010566	11088	162112	+	98.97	18.39
NM_001142741.1	11994	Eve2	LXEJ02002845	195293	320562	-	100	5.73
NM_001142741.1	11994	Eve2	LXEJ02010715	12125	85144	+	97.95	5.4
NM_001142742.1	11994	Eve2	LXEJ02000451	14779	74950	-	100	11.43
NM_001142742.1	11994	Eve2	LXEJ02012020	5331	28858	+	100	32.36
NM_001142742.1	11994	Eve2	LXEJ02010725	4048	55788	-	99.57	14.92
NM_001142742.1	11994	Eve2	LXEJ02010566	11088	155308	+	99.62	25.27
NM_001142742.1	11994	Eve2	LXEJ02002845	90790	320562	-	100	9.43
NM_001142742.1	11994	Eve2	LXEJ02010715	12125	72344	+	97.08	8.12
NM_001142743.1	11994	Eve2	LXEJ02000451	14779	74950	-	100	11.37
NM_001142743.1	11994	Eve2	LXEJ02012020	5331	28858	+	100	33.3
NM_001142743.1	11994	Eve2	LXEJ02010725	4048	55788	-	99.56	14.51
NM_001142743.1	11994	Eve2	LXEJ02010566	11088	155308	+	99.62	25.13
NM_001142743.1	11994	Eve2	LXEJ02002845	90790	320562	-	100	9.15
NM_001142743.1	11994	Eve2	LXEJ02010715	12125	72344	+	97.08	8.07
NM_001142746.1	11994	Eve2	LXEJ02000451	14779	74950	-	100	7.87
NM_001142746.1	11994	Eve2	LXEJ02012020	5331	33868	+	100	53.56
NM_001142746.1	11994	Eve2	LXEJ02010725	4048	55788	-	99.56	10.05
NM_001142746.1	11994	Eve2	LXEJ02010566	11088	155308	+	99.62	17.4
NM_001142746.1	11994	Eve2	LXEJ02002845	90790	320562	-	100	6.5
NM_001142746.1	11994	Eve2	LXEJ02010715	12125	52751	+	99.77	4.83
NM_001142747.1	11994	Eve2	LXEJ02000451	14779	74950	-	100	14.55
NM_001142747.1	11994	Eve2	LXEJ02010725	4048	55788	-	99.56	18.57
NM_001142747.1	11994	Eve2	LXEJ02010566	11088	68530	+	100	46.38
NM_001142747.1	11994	Eve2	LXEJ02002845	56815	320562	-	97.75	13.44
NM_001142747.1	11994	Eve2	LXEJ02010715	12125	52751	+	99.77	8.92
NM_001142748.1	11994	Eve2	LXEJ02000451	14779	74950	-	100	14.59
NM_001142748.1	11994	Eve2	LXEJ02010725	4048	55788	-	99.56	18.62
NM_001142748.1	11994	Eve2	LXEJ02010566	11088	68530	+	100	46.52
NM_001142748.1	11994	Eve2	LXEJ02002845	56815	320562	-	97.7	13.18
NM_001142748.1	11994	Eve2	LXEJ02010715	12125	52751	+	99.77	8.94
NM_001142760.1	11994	Eve2	LXEJ02000451	14779	74950	-	100	7.89
NM_001142760.1	11994	Eve2	LXEJ02012020	5331	33868	+	100	53.65
NM_001142760.1	11994	Eve2	LXEJ02010725	4048	55788	-	99.56	10.07
NM_001142760.1	11994	Eve2	LXEJ02010566	11088	155308	+	99.62	17.43
NM_001142760.1	11994	Eve2	LXEJ02002845	90790	320562	-	100	6.34
NM_001142760.1	11994	Eve2	LXEJ02010715	12125	52751	+	99.77	4.83
NM_011094.1	18730	Eve2	LXEJ02005455	16695	20798	+	98.09	86.99
NM_024244.4	71721	Eve2	LXEJ02002074	3788	10827	+	100	57.63
NM_024244.4	71721	Eve2	LXEJ02004967	1203499	1307131	+	99.78	42.56
NM_001143776.1	71721	Eve2	LXEJ02002074	3788	10827	+	100	57.6
NM_001143776.1	71721	Eve2	LXEJ02004967	1203499	1307131	+	99.78	42.6
NM_001143777.1	71721	Eve2	LXEJ02002074	3788	10827	+	100	55.86
NM_001143777.1	71721	Eve2	LXEJ02004967	1203257	1307131	+	99.8	44.32
NM_001143956.1	240879	Eve2	LXEJ02011096	48495	56644	+	100	48.24
NM_001143956.1	240879	Eve2	LXEJ02002881	684154	685422	-	99.27	52.7
NM_001145096.1	654498	Eve2	LXEJ02005109	518175	547997	+	99.57	83.28
NM_001145096.1	654498	Eve2	LXEJ02002305	83850	95237	+	99.27	18.39
NM_172895.3	243822	Eve2	LXEJ02007982	2194	8776	+	100	71.71
NM_172895.3	243822	Eve2	LXEJ02001199	387442	388473	+	100	27.42
NM_008547.2	17152	Eve2	LXEJ02002826	209719	241541	-	99.96	90.31
NM_008547.2	17152	Eve2	LXEJ02006829	5133	5462	-	100	9.74
NM_001145802.1	17152	Eve2	LXEJ02002826	209719	241541	-	99.96	86.77
NM_001145802.1	17152	Eve2	LXEJ02006829	5133	14701	-	100	13.28
NM_001145803.1	17152	Eve2	LXEJ02002826	209719	241541	-	99.96	87.84
NM_001145803.1	17152	Eve2	LXEJ02006829	5133	14701	-	100	12.21
NM_153539.3	215378	Eve2	LXEJ02012643	33026	34499	+	100	47.27
NM_153539.3	215378	Eve2	LXEJ02002777	86625	109157	-	98.78	23.73
NM_153539.3	215378	Eve2	LXEJ02000444	6095	105560	-	98.03	26.04
NM_001145807.1	215378	Eve2	LXEJ02012643	33026	34499	+	100	53.4
NM_001145807.1	215378	Eve2	LXEJ02002777	86625	107136	-	97.65	13.84
NM_001145807.1	215378	Eve2	LXEJ02000444	6095	75517	-	99.32	26.73
NM_008625.2	17533	Eve2	LXEJ02011309	27122	55035	-	100	54.09
NM_008625.2	17533	Eve2	LXEJ02002749	615994	666710	+	99.57	35.64
NM_008625.2	17533	Eve2	LXEJ02004028	6791	12761	+	99.3	10.78
NM_001081231.2	269629	Eve2	LXEJ02004828	501653	675503	-	100	85.47
NM_001081231.2	269629	Eve2	LXEJ02009094	1485173	1488879	+	98.07	15.66
NM_029990.1	269629	Eve2	LXEJ02004828	501653	675503	-	100	85.23
NM_029990.1	269629	Eve2	LXEJ02009094	1485173	1485608	+	99.77	14.86
NM_175029.3	242557	Eve2	LXEJ02000531	492392	500009	-	99.5	44.61
NM_175029.3	242557	Eve2	LXEJ02007154	16164	64937	+	99.03	60.81
NM_001145967.1	242557	Eve2	LXEJ02000531	492392	500009	-	99.5	50.71
NM_001145967.1	242557	Eve2	LXEJ02007154	16377	64937	+	98.8	55.57
NM_181422.3	329064	Eve2	LXEJ02008551	1035054	1044722	-	100	80.57
NM_181422.3	329064	Eve2	LXEJ02001306	21724	22745	+	100	15.56
NM_178721.4	239857	Eve2	LXEJ02012527	104690	332120	-	100	92.02
NM_178721.4	239857	Eve2	LXEJ02001079	51380	52117	-	100	7.7
NM_023670.3	140488	Eve2	LXEJ02004945	7462	29700	+	100	70.07
NM_023670.3	140488	Eve2	LXEJ02012148	59599	170358	+	100	38.61
NM_181407.4	109264	Eve2	LXEJ02005031	684897	705561	-	99.94	79.45
NM_181407.4	109264	Eve2	LXEJ02009539	19258	39577	-	100	7.89
NM_181407.4	109264	Eve2	LXEJ02001638	47129	50461	+	99.65	6.59
NM_181407.4	109264	Eve2	LXEJ02007576	58879	59163	+	98.94	6.52
NM_175210.3	74591	Eve2	LXEJ02005305	2550	159365	-	100	90.92
NM_175210.3	74591	Eve2	LXEJ02009850	82708	89577	-	100	9.09
NM_198007.2	77987	Eve2	LXEJ02002782	1870293	2043360	+	99.76	68.5
NM_198007.2	77987	Eve2	LXEJ02005958	26215	94273	+	100	32.45
NM_053172.2	94111	Eve2	LXEJ02003798	4969	6506	+	100	91.43
NM_010438.3	15275	Eve2	LXEJ02011410	123543	221526	+	100	53.78
NM_010438.3	15275	Eve2	LXEJ02000380	547605	560659	-	99.89	48.19
NM_001146100.1	15275	Eve2	LXEJ02011410	162950	221526	+	100	54.41
NM_001146100.1	15275	Eve2	LXEJ02000380	547605	560659	-	99.89	47.53
NM_011215.2	19276	Eve2	LXEJ02005100	1044985	1161532	-	100	59.66
NM_011215.2	19276	Eve2	LXEJ02004723	32419	208708	-	98.91	27.53
NM_011215.2	19276	Eve2	LXEJ02008724	29661	46772	+	97.61	6.14
NM_011215.2	19276	Eve2	LXEJ02002717	55917	56222	-	90.85	6.33
NM_173422.3	239447	Eve2	LXEJ02003427	83377	102718	-	99.7	94.87
NM_173422.3	239447	Eve2	LXEJ02002195	5169	33628	-	100	6.49
NM_001146200.1	30955	Eve2	LXEJ02000792	215	3679	+	100	52.23
NM_020272.2	30955	Eve2	LXEJ02000792	215	3679	+	100	50.87
NM_001146201.1	30955	Eve2	LXEJ02000792	215	3679	+	100	51.79
NM_177077.2	75914	Eve2	LXEJ02009440	1401737	1427282	-	99.44	59.26
NM_177077.2	75914	Eve2	LXEJ02007800	63	298733	-	98.77	43.18
NM_028483.1	73259	Eve2	LXEJ02009297	19396	33596	+	100	69.79
NM_028483.1	73259	Eve2	LXEJ02005306	2233492	2266154	+	95.8	39.84
NM_178934.4	353169	Eve2	LXEJ02008931	28753	38639	-	100	52.95
NM_178934.4	353169	Eve2	LXEJ02009670	15402	36097	-	100	43.77
NM_001013411.2	432450	Eve2	LXEJ02001830	57273	129201	+	99.96	78.72
NM_001013411.2	432450	Eve2	LXEJ02001555	70445	70731	-	98.25	8.92
NM_001025286.2	432450	Eve2	LXEJ02004353	68316	69056	-	100	60.09
NM_001025286.2	432450	Eve2	LXEJ02001555	48115	70731	-	95.32	29.11
NM_027913.1	71768	Eve2	LXEJ02012168	475	12644	+	99.94	51.77
NM_027913.1	71768	Eve2	LXEJ02005146	1327	14043	-	100	40.9
NM_028275.1	76633	Eve2	LXEJ02001953	2786	823323	-	100	85.4
NM_001014981.1	104082	Eve2	LXEJ02005206	169130	364637	+	100	55.53
NM_001014981.1	104082	Eve2	LXEJ02012251	1517	74384	+	99.71	45.06
NM_134103.2	16180	Eve2	LXEJ02010437	106445	132095	-	99.95	89.71
NM_015773.2	50525	Eve2	LXEJ02011914	96385	136037	-	99.86	89.65
NM_015773.2	50525	Eve2	LXEJ02008704	11389	11734	+	100	10.75
NM_001159354.1	99470	Eve2	LXEJ02001599	314903	407668	-	100	88.45
NM_001159354.1	99470	Eve2	LXEJ02006364	1118362	1119124	+	100	11.59
NM_133853.3	99470	Eve2	LXEJ02001599	314903	407668	-	100	88.6
NM_133853.3	99470	Eve2	LXEJ02006364	1118362	1119124	+	100	11.43
NM_177589.3	209012	Eve2	LXEJ02002316	187277	431167	-	99.73	55.83
NM_177589.3	209012	Eve2	LXEJ02011892	52162	84983	+	99.61	44.83
NM_145997.2	214899	Eve2	LXEJ02008567	150749	204614	-	99.97	83.38
NM_027906.1	219189	Eve2	LXEJ02006346	5629	165750	+	99.93	44.19
NM_027906.1	219189	Eve2	LXEJ02011432	1957	6857	+	100	22.41
NM_027906.1	219189	Eve2	LXEJ02008898	3466754	3486430	+	100	4.96
NM_027906.1	219189	Eve2	LXEJ02007505	9873	12266	-	100	4.15
NM_027906.1	219189	Eve2	LXEJ02006832	11008	97313	+	99.45	23.68
NM_173758.3	219189	Eve2	LXEJ02006346	5629	61734	+	100	41.19
NM_173758.3	219189	Eve2	LXEJ02008898	3466754	3486430	+	100	9.86
NM_173758.3	219189	Eve2	LXEJ02006832	11008	97313	+	99.45	47.07
NM_007643.4	12491	Eve2	LXEJ02004775	8092	30975	-	100	32.89
NM_007643.4	12491	Eve2	LXEJ02004818	3538754	3555364	-	100	65.92
NM_001159555.1	12491	Eve2	LXEJ02004775	8092	30975	-	100	32.83
NM_001159555.1	12491	Eve2	LXEJ02004818	3538754	3555364	-	100	65.97
NM_001159556.1	12491	Eve2	LXEJ02004775	8092	44871	-	100	30.06
NM_001159556.1	12491	Eve2	LXEJ02004818	3538754	3555364	-	100	68.69
NM_001159557.1	12491	Eve2	LXEJ02004775	8092	44871	-	100	31.1
NM_001159557.1	12491	Eve2	LXEJ02004818	3538754	3555364	-	100	67.68
NM_001159558.1	12491	Eve2	LXEJ02004775	8092	84028	-	100	33.34
NM_001159558.1	12491	Eve2	LXEJ02004818	3538754	3555364	-	100	65.47
NM_007820.2	13114	Eve2	LXEJ02004249	50004	70676	+	98.86	65.83
NM_007820.2	13114	Eve2	LXEJ02005783	5599	11478	-	99.2	36.24
NM_178617.4	69352	Eve2	LXEJ02010350	1532371	1585233	-	100	88.37
NM_178617.4	69352	Eve2	LXEJ02012268	113301	114852	-	97.95	6.86
NM_008792.4	18549	Eve2	LXEJ02008886	4658	52443	+	99.81	80.14
NM_008792.4	18549	Eve2	LXEJ02006539	1459399	1486828	-	98.18	13.7
NM_008792.4	18549	Eve2	LXEJ02003698	9338	59335	-	89.04	10.4
NM_016744.4	18573	Eve2	LXEJ02004049	1307	74707	+	99.2	35.15
NM_016744.4	18573	Eve2	LXEJ02012356	694684	1006750	+	98.19	73.17
NM_001159582.1	18573	Eve2	LXEJ02004049	11949	74707	+	99.93	32.49
NM_001159582.1	18573	Eve2	LXEJ02012356	694243	1006750	+	98.3	74.39
NM_178675.4	215085	Eve2	LXEJ02008340	168899	374938	+	100	86.6
NM_178675.4	215085	Eve2	LXEJ02012408	56073	71343	-	99.14	14.13
NM_178143.2	108079	Eve2	LXEJ02001491	183137	280620	+	99.88	93.53
NM_145947.2	208890	Eve2	LXEJ02009537	22050	82533	+	100	74.6
NM_145947.2	208890	Eve2	LXEJ02001778	7870	39348	-	100	25.6
NM_173029.3	271639	Eve2	LXEJ02007995	5330	43721	+	100	67.86
NM_173029.3	271639	Eve2	LXEJ02000407	70280	107061	+	100	31.08
NM_010417.2	15203	Eve2	LXEJ02004270	11488	32131	+	100	34.29
NM_010417.2	15203	Eve2	LXEJ02006944	4596	79693	-	99.67	65.77
NM_001159627.1	15203	Eve2	LXEJ02004270	11488	32131	+	100	34.34
NM_001159627.1	15203	Eve2	LXEJ02006944	4596	78783	-	99.67	65.72
NM_001159628.1	15203	Eve2	LXEJ02004270	11488	32131	+	100	34.24
NM_001159628.1	15203	Eve2	LXEJ02006944	4596	79693	-	99.67	66.2
NM_026367.4	67769	Eve2	LXEJ02003720	3696	13655	+	100	69.66
NM_198117.2	353234	Eve2	LXEJ02008908	410896	442402	-	100	53.42
NM_198117.2	353234	Eve2	LXEJ02011707	39509	42009	-	100	46.49
NM_153135.3	210801	Eve2	LXEJ02000203	362668	560762	+	100	91.77
NM_153135.3	210801	Eve2	LXEJ02007278	134995	135400	+	99.01	4.39
NM_153135.3	210801	Eve2	LXEJ02008714	1692	25555	-	91.46	5.23
NM_001025568.2	18575	Eve2	LXEJ02004565	3519	84869	+	99.96	92.45
NM_001025568.2	18575	Eve2	LXEJ02002051	117326	117988	-	98.36	7.47
NM_011054.4	18575	Eve2	LXEJ02004565	3519	105415	+	99.95	86.22
NM_011054.4	18575	Eve2	LXEJ02002051	95483	118115	-	95.65	16.46
NM_001159953.1	18575	Eve2	LXEJ02004565	3519	115596	+	99.93	82.92
NM_001159953.1	18575	Eve2	LXEJ02002051	117326	117988	-	98.36	16.96
NM_001159955.1	18575	Eve2	LXEJ02004565	3519	105415	+	99.95	94.62
NM_001159960.1	18575	Eve2	LXEJ02004565	3519	84869	+	99.96	93.79
NM_001159960.1	18575	Eve2	LXEJ02002051	117326	118482	-	97.98	6.14
NM_030025.2	78016	Eve2	LXEJ02007305	1172	97413	+	100	79.9
NM_030025.2	78016	Eve2	LXEJ02010578	1855	15124	+	100	20.14
NM_013862.5	29809	Eve2	LXEJ02005667	1955340	2090989	-	99.79	28.69
NM_013862.5	29809	Eve2	LXEJ02005060	7240	154985	-	99.94	53.57
NM_013862.5	29809	Eve2	LXEJ02003442	37899	249516	+	97.22	21.22
NM_025819.4	66875	Eve2	LXEJ02009240	111112	148109	+	100	59.35
NM_025819.4	66875	Eve2	LXEJ02003560	1731	22808	+	99.73	40.94
NM_008142.4	14688	Eve2	LXEJ02002227	352363	359980	-	100	76.58
NM_008142.4	14688	Eve2	LXEJ02005276	7706	59590	-	95.59	25.48
NM_001160016.1	14688	Eve2	LXEJ02002227	352363	359980	-	100	76.56
NM_001160016.1	14688	Eve2	LXEJ02005276	7706	59590	-	95.59	25.5
NM_001160017.1	14688	Eve2	LXEJ02002227	352363	359980	-	100	77.77
NM_001160017.1	14688	Eve2	LXEJ02005276	7706	59590	-	95.31	24.32
NM_199066.2	387131	Eve2	LXEJ02001781	5945	13352	-	98.02	86.31
NM_172485.3	210417	Eve2	LXEJ02006413	3445	95667	-	100	24.12
NM_172485.3	210417	Eve2	LXEJ02005207	155122	532176	+	99.6	48.73
NM_172485.3	210417	Eve2	LXEJ02000841	420940	421237	+	100	4.74
NM_172485.3	210417	Eve2	LXEJ02005884	156	14523	+	99.38	20.77
NM_001018019.2	433899	Eve2	LXEJ02004817	111890	112344	+	100	41.78
NM_001018019.2	433899	Eve2	LXEJ02008010	12968	23539	+	100	34.92
NM_001018019.2	433899	Eve2	LXEJ02006489	5107	30340	+	93.93	29.75
NM_144881.4	226861	Eve2	LXEJ02005471	1039298	1218033	+	100	54.42
NM_144881.4	226861	Eve2	LXEJ02002754	19723	59979	+	99.92	45.71
NM_001029977.3	214403	Eve2	LXEJ02000957	18496	68198	+	100	80.74
NM_001029977.3	214403	Eve2	LXEJ02002521	23274	27336	-	100	19.25
NM_001160303.1	214403	Eve2	LXEJ02000957	18496	68198	+	100	80.72
NM_001160303.1	214403	Eve2	LXEJ02002521	23274	27336	-	100	19.27
NM_001160304.1	214403	Eve2	LXEJ02000957	18496	67425	+	100	79.48
NM_001160304.1	214403	Eve2	LXEJ02002521	23274	27339	-	99.82	20.62
NM_001160403.1	331461	Eve2	LXEJ02005941	37781	78384	+	100	47.93
NM_001160403.1	331461	Eve2	LXEJ02008746	150513	1262902	-	99.7	49.32
NM_013881.4	29869	Eve2	LXEJ02007240	91365	123978	-	99.9	71.42
NM_013881.4	29869	Eve2	LXEJ02008848	2749916	2792287	+	100	28.79
NM_172575.3	246196	Eve2	LXEJ02003282	5322	57174	+	99.6	72.24
NM_172575.3	246196	Eve2	LXEJ02009295	691335	758619	+	99.85	29.09
NM_178845.3	246196	Eve2	LXEJ02003282	8055	57174	+	100	84.24
NM_178845.3	246196	Eve2	LXEJ02009295	691335	758619	+	99.7	16.18
NM_173051.2	380839	Eve2	LXEJ02001495	347297	352171	+	100	78.67
NM_007977.2	14069	Eve2	LXEJ02009686	12670	98605	-	99.97	65.2
NM_007977.2	14069	Eve2	LXEJ02005015	336177	399713	+	100	30.74
NM_007977.2	14069	Eve2	LXEJ02005259	212672	212969	-	100	3.96
NM_001161373.1	14069	Eve2	LXEJ02009686	12670	90685	-	99.97	64.2
NM_001161373.1	14069	Eve2	LXEJ02005015	336177	399714	+	100	31.64
NM_001161373.1	14069	Eve2	LXEJ02005259	212672	212969	-	100	4.08
NM_001161374.1	14069	Eve2	LXEJ02009686	12678	90685	-	100	64.15
NM_001161374.1	14069	Eve2	LXEJ02005015	336177	399714	+	100	31.67
NM_001161374.1	14069	Eve2	LXEJ02005259	212672	212969	-	100	4.08
NM_001161413.1	17254	Eve2	LXEJ02011796	170781	177655	-	99.95	86.38
NM_001161413.1	17254	Eve2	LXEJ02006816	586	981	-	98.99	14.07
NM_199024.2	319211	Eve2	LXEJ02010254	42351	44226	-	100	37.3
NM_199024.2	319211	Eve2	LXEJ02010151	54300	213791	-	99.52	53.68
NM_199024.2	319211	Eve2	LXEJ02006603	34792	74520	-	100	10.12
NM_001161483.1	319211	Eve2	LXEJ02010151	54300	195693	-	99.69	84.13
NM_001161483.1	319211	Eve2	LXEJ02006603	34792	74527	-	99.8	14.56
NM_001004141.2	100066	Eve2	LXEJ02001887	1725	43148	-	99.77	67.24
NM_001004141.2	100066	Eve2	LXEJ02001083	3170	6426	+	99.06	33.07
NM_019800.4	66659	Eve2	LXEJ02001886	64120	74856	-	99.91	66.74
NM_153402.2	214150	Eve2	LXEJ02009967	46140	69288	-	100	78.23
NM_153402.2	214150	Eve2	LXEJ02012152	39762	105679	+	100	24.19
NM_178786.4	320640	Eve2	LXEJ02002596	907270	957408	+	100	91.89
NM_174868.4	215708	Eve2	LXEJ02004180	90	50558	+	100	85.24
NM_174868.4	215708	Eve2	LXEJ02005966	192763	199694	+	99.74	14.86
NM_001162375.1	215708	Eve2	LXEJ02004180	90	50558	+	100	84.69
NM_001162375.1	215708	Eve2	LXEJ02005966	192763	199694	+	99.74	15.41
NM_015769.2	50505	Eve2	LXEJ02009993	25887	47765	-	100	78.97
NM_015769.2	50505	Eve2	LXEJ02003676	1	20885	-	99.94	28.36
NM_001162414.1	637515	Eve2	LXEJ02000348	8481	8790	+	100	7.5
NM_134123.3	106583	Eve2	LXEJ02012340	4747	86581	-	99.75	58.36
NM_134123.3	106583	Eve2	LXEJ02008945	3820514	3829209	-	99.81	54.56
NM_001162864.1	106763	Eve2	LXEJ02008388	869506	904564	-	100	87.35
NM_001162864.1	106763	Eve2	LXEJ02004379	857299	860827	+	99.75	5.97
NM_010084.2	13524	Eve2	LXEJ02009636	510463	561702	+	100	76.06
NM_010084.2	13524	Eve2	LXEJ02011232	885	10302	-	99.82	24.22
NM_010003.2	13098	Eve2	LXEJ02010260	38079	69872	-	99.92	71.45
NM_010003.2	13098	Eve2	LXEJ02001841	45830	48658	+	100	28.59
NM_177855.3	329650	Eve2	LXEJ02001761	1197896	1466929	-	100	57.17
NM_177855.3	329650	Eve2	LXEJ02006822	11284	33693	+	100	41.8
NM_001162956.1	76138	Eve2	LXEJ02004830	357710	421849	+	100	71.81
NM_001162956.1	76138	Eve2	LXEJ02011825	144345	147000	-	100	28.18
NM_001162957.1	212892	Eve2	LXEJ02009996	964825	972779	+	99.93	80.16
NM_026910.1	665113	Eve2	LXEJ02002649	199724	337419	-	100	89.66
NM_026910.1	665113	Eve2	LXEJ02009293	11998	254741	-	100	10.28
NM_001163007.1	665113	Eve2	LXEJ02002649	199724	337419	-	100	89.63
NM_001163007.1	665113	Eve2	LXEJ02009293	11998	254741	-	100	10.32
NM_001163008.1	665113	Eve2	LXEJ02002649	199724	337419	-	100	89.5
NM_001163008.1	665113	Eve2	LXEJ02009293	11998	254741	-	100	10.44
NM_001163009.1	665113	Eve2	LXEJ02002649	203859	337419	-	100	84.1
NM_001163009.1	665113	Eve2	LXEJ02009293	11998	254741	-	100	15.89
NM_008067.4	14396	Eve2	LXEJ02006143	28774	107469	-	100	85.64
NM_008067.4	14396	Eve2	LXEJ02010165	20520	33318	+	99.02	8.23
NM_021302.3	57740	Eve2	LXEJ02005012	1147221	1218637	+	99.43	64.91
NM_021302.3	57740	Eve2	LXEJ02007498	1826	3527	+	99.38	36.87
NM_001162540.1	57740	Eve2	LXEJ02005012	1122393	1218637	+	99.28	59.32
NM_001162540.1	57740	Eve2	LXEJ02007498	1826	3527	+	99.38	42.75
NM_010248.2	14389	Eve2	LXEJ02000006	35390	72545	+	100	92.47
NM_010248.2	14389	Eve2	LXEJ02004363	76994	77294	+	100	5
NM_001162477.1	14389	Eve2	LXEJ02000006	35390	72545	+	100	92.47
NM_001162477.1	14389	Eve2	LXEJ02004363	76994	77294	+	100	5.01
NM_172146.2	231327	Eve2	LXEJ02007439	2412439	2431335	-	99.73	85.35
NM_172146.2	231327	Eve2	LXEJ02011802	2141703	2142324	+	100	15.51
NM_026135.1	383348	Eve2	LXEJ02006835	76766	77298	-	100	39.04
NM_026135.1	383348	Eve2	LXEJ02000828	1618427	1625008	-	99.07	63.36
NM_001163026.1	235567	Eve2	LXEJ02011492	6775	76678	+	100	79.29
NM_001163026.1	235567	Eve2	LXEJ02006727	1098759	1133267	+	100	20.73
NM_001163126.1	238123	Eve2	LXEJ02005090	484928	737089	-	100	85.45
NM_001163126.1	238123	Eve2	LXEJ02004968	4829	20349	-	99.77	14.74
NM_025992.2	67138	Eve2	LXEJ02001386	1151914	1218619	+	99.97	91.02
NM_025992.2	67138	Eve2	LXEJ02003607	399	2745	-	99.5	7.72
NM_028052.4	72003	Eve2	LXEJ02011859	28333	150298	-	99.82	88.98
NM_028052.4	72003	Eve2	LXEJ02003277	121930	147032	-	94.45	15.24
NM_153058.4	212307	Eve2	LXEJ02010151	1257567	1260575	+	100	74.4
NM_001162941.1	212307	Eve2	LXEJ02010151	1115389	1260575	+	99.2	82.01
NM_001162942.1	212307	Eve2	LXEJ02010151	1113997	1260575	+	99.43	81.04
NM_007736.4	12830	Eve2	LXEJ02001033	7222	124646	+	100	93.36
NM_007736.4	12830	Eve2	LXEJ02009875	321533	404986	+	100	6.64
NM_001163155.1	12830	Eve2	LXEJ02001033	7222	124646	+	100	90.89
NM_001163155.1	12830	Eve2	LXEJ02009875	321533	404986	+	100	9.11
NM_001163223.1	207618	Eve2	LXEJ02007459	28135	37673	-	99.94	93.87
NM_027943.1	71830	Eve2	LXEJ02009277	4727	19867	+	100	70.4
NM_027943.1	71830	Eve2	LXEJ02007234	142466	151080	+	99.53	29.82
NM_201258.2	100012	Eve2	LXEJ02005301	1036171	1049109	-	99.14	31.42
NM_009705.3	11847	Eve2	LXEJ02005034	594	25059	+	100	86.66
NM_009705.3	11847	Eve2	LXEJ02002835	846661	847786	-	100	18.84
NM_173748.4	209586	Eve2	LXEJ02005467	258	45182	+	100	79.08
NM_173748.4	209586	Eve2	LXEJ02004938	9359	59337	-	98.59	25.04
NM_028759.1	74106	Eve2	LXEJ02004208	296091	366456	-	100	72.05
NM_028759.1	74106	Eve2	LXEJ02000407	5211	45561	-	100	23.86
NM_178631.4	76897	Eve2	LXEJ02000903	579435	721997	-	100	73.75
NM_178631.4	76897	Eve2	LXEJ02010147	162731	495585	-	96.59	31.24
NM_001163328.1	76897	Eve2	LXEJ02000903	579435	737096	-	99.37	78.85
NM_001163328.1	76897	Eve2	LXEJ02010147	162731	495585	-	96.13	28.6
NM_001163330.1	76897	Eve2	LXEJ02000903	579435	722549	-	99.94	91.92
NM_030699.2	80883	Eve2	LXEJ02008984	23967	32176	-	100	25.09
NM_030699.2	80883	Eve2	LXEJ02001769	1811768	1966931	-	99.85	75.2
NM_133488.1	80883	Eve2	LXEJ02008984	23967	32176	-	100	26.26
NM_133488.1	80883	Eve2	LXEJ02001769	1811768	1966931	-	99.84	74.05
NM_001163348.1	80883	Eve2	LXEJ02008984	23967	32176	-	100	25.91
NM_001163348.1	80883	Eve2	LXEJ02001769	1811768	1966931	-	99.84	74.39
NM_001163349.1	80883	Eve2	LXEJ02008984	23967	32176	-	100	26.6
NM_001163349.1	80883	Eve2	LXEJ02001769	1811768	1966931	-	99.83	73.71
NM_001163350.1	80883	Eve2	LXEJ02008984	23967	32176	-	100	25.95
NM_001163350.1	80883	Eve2	LXEJ02001769	1811768	1966931	-	99.84	74.35
NM_001163351.1	80883	Eve2	LXEJ02008984	23967	32176	-	100	61.27
NM_001163351.1	80883	Eve2	LXEJ02001769	1883474	1966931	-	99.3	39.45
NM_010004.2	13099	Eve2	LXEJ02002225	14366	24730	+	100	50.3
NM_010004.2	13099	Eve2	LXEJ02002621	14988	28063	+	99.78	26.28
NM_010004.2	13099	Eve2	LXEJ02000128	9884	10311	+	99.06	23.76
NM_138666.3	192167	Eve2	LXEJ02000169	38491	46727	+	100	64.36
NM_138666.3	192167	Eve2	LXEJ02003451	61442	484683	+	100	35.66
NM_001163387.1	192167	Eve2	LXEJ02000169	38491	46727	+	100	78.14
NM_001163387.1	192167	Eve2	LXEJ02003451	240033	484683	+	100	21.89
NM_008677.2	17972	Eve2	LXEJ02004958	2889264	2891220	-	100	40.02
NM_008677.2	17972	Eve2	LXEJ02005175	1584	12814	-	99.21	60.49
NM_138312.1	68675	Eve2	LXEJ02002901	26239	28975	+	99.89	68.06
NM_138312.1	68675	Eve2	LXEJ02009835	2766	36962	+	100	7.13
NM_138312.1	68675	Eve2	LXEJ02007071	4788	81156	+	94.55	10.8
NM_001163419.1	68675	Eve2	LXEJ02002901	26239	28975	+	99.89	70.23
NM_001163419.1	68675	Eve2	LXEJ02007071	4788	81156	+	94.55	11.14
NM_001163420.1	68675	Eve2	LXEJ02002901	26239	28975	+	99.89	73.87
NM_001163420.1	68675	Eve2	LXEJ02007071	4788	81156	+	94.55	11.72
NM_001163378.1	76967	Eve2	LXEJ02004264	42635	100272	+	99.98	89.2
NM_001163378.1	76967	Eve2	LXEJ02010347	747907	775170	+	100	10.86
NM_144844.2	110821	Eve2	LXEJ02005332	10499	110141	+	99.91	44.33
NM_144844.2	110821	Eve2	LXEJ02011998	42362	119110	+	100	28.08
NM_144844.2	110821	Eve2	LXEJ02007777	16215	66994	+	99.79	19.13
NM_172015.3	105148	Eve2	LXEJ02006169	1138080	1179027	+	99.96	61.41
NM_172015.3	105148	Eve2	LXEJ02006632	140593	150244	-	100	38.69
NM_028434.3	73090	Eve2	LXEJ02005778	11545	17388	-	99.82	67.17
NM_028434.3	73090	Eve2	LXEJ02009842	7649	13676	-	97.76	35.49
NM_025434.3	66230	Eve2	LXEJ02002885	33667	33935	+	100	37.25
NM_025434.3	66230	Eve2	LXEJ02009940	16140	16411	-	100	36.85
NM_025434.3	66230	Eve2	LXEJ02006201	4427	4609	+	100	24.79
NM_011090.2	18726	Eve2	LXEJ02007563	509	4601	-	99.94	77.59
NM_025489.3	66326	Eve2	LXEJ02002252	39377	39696	-	100	33.93
NM_025489.3	66326	Eve2	LXEJ02009667	39580	110102	+	99.84	66.31
NM_001163536.1	66326	Eve2	LXEJ02002252	39377	39696	-	100	34.18
NM_001163536.1	66326	Eve2	LXEJ02009667	39580	110102	+	99.83	66.06
NM_001163537.1	66326	Eve2	LXEJ02002252	39377	39696	-	100	33.47
NM_001163537.1	66326	Eve2	LXEJ02009667	62232	110102	+	99.84	66.77
NM_029929.3	77573	Eve2	LXEJ02004964	308964	356285	-	99.92	97.13
NM_016885.2	59308	Eve2	LXEJ02007813	9073	23419	+	100	61.53
NM_016885.2	59308	Eve2	LXEJ02004923	1889663	1955340	-	98.45	40.76
NM_001163522.1	59308	Eve2	LXEJ02007813	9071	23419	+	100	60.02
NM_001163522.1	59308	Eve2	LXEJ02004923	1892403	1955340	-	100	39.7
NM_029298.1	75467	Eve2	LXEJ02007092	4966	21477	-	100	70.83
NM_029298.1	75467	Eve2	LXEJ02002738	315450	321144	-	100	29.16
NM_146122.3	227801	Eve2	LXEJ02005133	12724	235246	+	100	82.49
NM_146122.3	227801	Eve2	LXEJ02005464	964859	1125707	+	99.82	12.86
NM_172777.3	236573	Eve2	LXEJ02011286	1944	8716	+	100	79.98
NM_172777.3	236573	Eve2	LXEJ02003143	1782	18000	-	99.86	20.25
NM_011455.3	93806	Eve2	LXEJ02001291	37714	45159	-	100	79.16
NM_028992.1	74548	Eve2	LXEJ02005109	2565559	2586387	+	95.76	94.24
NM_028243.3	72461	Eve2	LXEJ02004257	41199	58109	-	100	77.29
NM_028243.3	72461	Eve2	LXEJ02003331	81661	116721	+	100	22.7
NM_172869.4	242506	Eve2	LXEJ02001952	1253633	1369487	+	100	92.1
NM_172869.4	242506	Eve2	LXEJ02004631	25199	44117	-	98.41	9.52
NM_001163732.1	242506	Eve2	LXEJ02001952	1253633	1381774	+	100	84.63
NM_001163732.1	242506	Eve2	LXEJ02004631	11541	44117	-	97.8	17.71
NM_175510.3	329178	Eve2	LXEJ02010146	547368	577419	-	99.98	42.31
NM_175510.3	329178	Eve2	LXEJ02006594	8243	72649	-	100	29.28
NM_175510.3	329178	Eve2	LXEJ02006725	5649	48127	-	100	17.29
NM_175510.3	329178	Eve2	LXEJ02008038	11560	31836	-	100	5.91
NM_175510.3	329178	Eve2	LXEJ02007062	13184	22582	-	100	5.26
NM_145553.2	230789	Eve2	LXEJ02010631	640	17616	+	99.67	89.52
NM_001163792.1	230789	Eve2	LXEJ02010631	640	17616	+	99.66	89.21
NM_030110.1	78506	Eve2	LXEJ02010693	12812	23579	+	100	70.53
NM_030110.1	78506	Eve2	LXEJ02007811	58347	116538	+	99.89	29.43
NM_172461.3	208583	Eve2	LXEJ02006727	14718	175501	+	99.85	78.62
NM_172461.3	208583	Eve2	LXEJ02012241	8496	55948	-	90.05	26.09
NM_172805.3	238271	Eve2	LXEJ02003635	32144	244512	-	99.75	69.73
NM_172805.3	238271	Eve2	LXEJ02008532	30596	31834	+	100	30.5
NM_015794.1	50758	Eve2	LXEJ02007631	42214	381269	+	99.98	87.81
NM_015794.1	50758	Eve2	LXEJ02009514	14121	73393	-	98.25	13.41
NM_007963.2	14013	Eve2	LXEJ02009662	4145	32834	+	100	67.93
NM_007963.2	14013	Eve2	LXEJ02004605	3162	31190	-	100	32.06
NM_008875.4	18805	Eve2	LXEJ02009293	384582	446366	-	99.74	71.47
NM_008875.4	18805	Eve2	LXEJ02008948	976371	1048744	+	99.92	28.85
NM_001164056.1	18805	Eve2	LXEJ02009293	384582	446366	-	99.74	70.68
NM_001164056.1	18805	Eve2	LXEJ02008948	930641	1048744	+	100	29.65
NM_009529.3	22526	Eve2	LXEJ02012108	13610	29166	-	99.84	71.55
NM_009529.3	22526	Eve2	LXEJ02004975	941717	943419	-	100	28.35
NM_001164190.1	17772	Eve2	LXEJ02001594	767249	774846	-	100	52.43
NM_001164190.1	17772	Eve2	LXEJ02008660	16565	87784	+	100	42.31
NM_001164191.1	17772	Eve2	LXEJ02001594	767249	774846	-	100	54.12
NM_001164191.1	17772	Eve2	LXEJ02008660	182	87784	+	100	45.93
NM_019926.3	17772	Eve2	LXEJ02001594	767249	774846	-	100	54.3
NM_019926.3	17772	Eve2	LXEJ02008660	258	87784	+	100	45.75
NM_001164192.1	17772	Eve2	LXEJ02001594	767249	774846	-	100	55.66
NM_001164192.1	17772	Eve2	LXEJ02008660	182	87784	+	100	44.4
NM_027944.1	71831	Eve2	LXEJ02002150	23291	67748	-	100	14.13
NM_027944.1	71831	Eve2	LXEJ02006928	83101	640602	+	98.08	66.04
NM_001164235.1	71831	Eve2	LXEJ02002150	23291	67748	-	100	13.36
NM_001164235.1	71831	Eve2	LXEJ02006928	83101	640602	+	98.23	67.9
NM_183310.2	232035	Eve2	LXEJ02002872	46911	49991	+	100	54.49
NM_183310.2	232035	Eve2	LXEJ02008958	3050241	3705556	-	100	44.76
NM_001164316.1	232035	Eve2	LXEJ02002872	46911	49991	+	100	54.99
NM_001164316.1	232035	Eve2	LXEJ02008958	3050241	3705556	-	100	44.25
NM_001164327.1	236451	Eve2	LXEJ02004581	10626	20960	-	100	84.6
NM_001164329.1	628693	Eve2	LXEJ02007291	291786	305958	-	100	91.31
NM_001004194.2	446099	Eve2	LXEJ02000576	9997	36101	+	99.72	42.9
NM_001004194.2	446099	Eve2	LXEJ02009361	11158	16654	+	99.62	47.84
NM_001004194.2	446099	Eve2	LXEJ02000558	17477	17858	+	97.38	11.17
NM_028687.1	73936	Eve2	LXEJ02010347	1641292	1700635	-	100	79.58
NM_028687.1	73936	Eve2	LXEJ02005208	177198	187171	+	100	20.41
NM_146241.2	237553	Eve2	LXEJ02005220	10031	129400	+	99.97	71.05
NM_146241.2	237553	Eve2	LXEJ02002832	1261602	1474532	+	100	26.61
NM_146148.2	230558	Eve2	LXEJ02001491	433834	497909	+	100	94.47
NM_144785.2	207151	Eve2	LXEJ02000172	633	30083	-	100	76.2
NM_144785.2	207151	Eve2	LXEJ02005190	6309	7682	+	100	23.94
NM_020614.2	21340	Eve2	LXEJ02004899	1478125	1531751	-	99.94	91.77
NM_172143.2	218165	Eve2	LXEJ02012154	5369	233019	-	99.6	88.74
NM_172143.2	218165	Eve2	LXEJ02000016	35863	49484	+	100	13.63
NM_177612.3	216033	Eve2	LXEJ02011430	43247	828580	+	99.95	68.96
NM_177612.3	216033	Eve2	LXEJ02008152	211511	670756	+	96.68	19.92
NM_177612.3	216033	Eve2	LXEJ02009903	85164	129758	-	94.49	14.63
NM_001164376.1	216033	Eve2	LXEJ02011430	43247	828580	+	99.95	67.61
NM_001164376.1	216033	Eve2	LXEJ02000400	3278	49913	-	100	7.06
NM_001164376.1	216033	Eve2	LXEJ02008152	607522	670756	+	96.4	15.72
NM_001164376.1	216033	Eve2	LXEJ02009903	85164	129758	-	94.49	14.34
NM_001164519.1	216033	Eve2	LXEJ02011430	33771	828580	+	99.92	88.02
NM_001164519.1	216033	Eve2	LXEJ02008152	608358	670756	+	95.6	16.65
NM_023729.3	74068	Eve2	LXEJ02003517	54170	91265	+	100	62.06
NM_023729.3	74068	Eve2	LXEJ02003797	537601	542181	+	99.84	38.16
NM_011731.3	22599	Eve2	LXEJ02000930	17556	35862	-	100	86.12
NM_017390.4	53878	Eve2	LXEJ02011999	393453	395691	-	100	88.91
NM_001164593.1	239618	Eve2	LXEJ02001639	10107	38359	+	100	68.42
NM_001164593.1	239618	Eve2	LXEJ02007991	2525076	2839922	+	98.18	34.52
NM_001164594.1	239618	Eve2	LXEJ02001639	10107	38359	+	100	79.78
NM_001164594.1	239618	Eve2	LXEJ02007991	2725346	2839922	+	96.92	23.66
NM_175650.4	268878	Eve2	LXEJ02001509	47275	153833	+	99.78	60.5
NM_175650.4	268878	Eve2	LXEJ02012525	747978	783116	-	100	39.22
NM_001164612.1	224079	Eve2	LXEJ02009971	28488	66097	+	100	35.58
NM_001164612.1	224079	Eve2	LXEJ02001509	3252	29974	+	99.66	43.68
NM_001164612.1	224079	Eve2	LXEJ02003528	7899	15588	+	96.88	12.15
NM_001164613.1	224079	Eve2	LXEJ02009971	28488	66097	+	100	50.43
NM_001164613.1	224079	Eve2	LXEJ02001509	3252	5281	+	98.83	17.9
NM_001164613.1	224079	Eve2	LXEJ02007629	3673128	3676752	+	99.66	10.23
NM_001164613.1	224079	Eve2	LXEJ02003528	7899	15588	+	96.88	17.22
NM_133821.3	98432	Eve2	LXEJ02007816	17721	93103	-	99.97	68.95
NM_133821.3	98432	Eve2	LXEJ02005377	54028	169268	+	100	31.09
NM_001164628.1	73167	Eve2	LXEJ02003640	1517531	1543637	+	100	32.71
NM_001164628.1	73167	Eve2	LXEJ02003346	8395	19303	+	98.44	33.77
NM_001164627.1	73167	Eve2	LXEJ02003640	1517531	1543637	+	100	33.07
NM_001164627.1	73167	Eve2	LXEJ02003346	8395	19303	+	98.44	33.59
NM_013666.2	225742	Eve2	LXEJ02010483	3695	17038	+	100	72.42
NM_013666.2	225742	Eve2	LXEJ02007338	98334	145322	+	100	27.48
NM_153124.2	225742	Eve2	LXEJ02010483	3695	17038	+	100	76.34
NM_153124.2	225742	Eve2	LXEJ02007338	98334	145322	+	100	23.57
NM_180662.2	76510	Eve2	LXEJ02005154	468112	835680	+	100	78.42
NM_180662.2	76510	Eve2	LXEJ02002897	57244	93356	+	97.46	22.33
NM_029640.2	76510	Eve2	LXEJ02005154	473504	835680	+	100	73.58
NM_029640.2	76510	Eve2	LXEJ02002897	92136	93356	+	100	23.25
NM_001164669.1	330355	Eve2	LXEJ02009481	1	108796	-	100	55.17
NM_001164669.1	330355	Eve2	LXEJ02007996	3431	89110	+	100	44.83
NM_001164689.1	626832	Eve2	LXEJ02010372	3369	18832	+	97.29	95.56
NM_173023.2	271036	Eve2	LXEJ02004562	104360	267529	-	100	84.31
NM_001033379.3	319618	Eve2	LXEJ02005127	907991	914837	-	100	79.37
NM_001033379.3	319618	Eve2	LXEJ02008153	974396	1005777	+	97.77	21.59
NM_001164677.1	18571	Eve2	LXEJ02006887	1102	11877	+	100	69.72
NM_001164677.1	18571	Eve2	LXEJ02005307	1767038	1796990	+	100	22.55
NM_001164678.1	18571	Eve2	LXEJ02006887	1102	11877	+	100	69.94
NM_001164678.1	18571	Eve2	LXEJ02005307	1767038	1796990	+	100	22.32
NM_011052.2	18571	Eve2	LXEJ02006887	1102	11877	+	100	69.9
NM_011052.2	18571	Eve2	LXEJ02005307	1767038	1796990	+	100	22.36
NM_009027.3	19418	Eve2	LXEJ02011049	28851	68374	+	99.98	66.5
NM_009027.3	19418	Eve2	LXEJ02011254	645541	801688	-	100	33.65
NM_029685.1	76640	Eve2	LXEJ02010412	149514	154246	-	99.79	71.77
NM_001034899.3	545391	Eve2	LXEJ02004089	9737	10888	-	100	69.27
NM_001164805.1	330267	Eve2	LXEJ02000653	27709	81194	-	99.93	69.96
NM_001164805.1	330267	Eve2	LXEJ02010648	11945	136591	-	100	18.57
NM_001164805.1	330267	Eve2	LXEJ02003648	25091	25924	-	99.88	7.56
NM_001164805.1	330267	Eve2	LXEJ02008045	69669	70134	-	99.35	4.22
NM_001164785.1	223838	Eve2	LXEJ02010171	20212	62482	-	100	84.01
NM_001164785.1	223838	Eve2	LXEJ02012465	1069	25691	-	100	15.99
NM_001164786.1	223838	Eve2	LXEJ02010171	51312	62482	-	100	43.17
NM_001164786.1	223838	Eve2	LXEJ02012465	1069	25691	-	100	56.92
NM_028950.4	74455	Eve2	LXEJ02002749	1421812	1440040	-	100	62.75
NM_028950.4	74455	Eve2	LXEJ02007389	69882	89174	+	100	37.35
NM_001165941.1	74455	Eve2	LXEJ02002749	1421812	1440040	-	100	60.42
NM_001165941.1	74455	Eve2	LXEJ02007389	64322	89174	+	100	39.67
NM_001165943.1	74455	Eve2	LXEJ02002749	1421812	1440040	-	100	66.93
NM_001165943.1	74455	Eve2	LXEJ02007389	64322	89174	+	100	33.17
NM_198005.2	75763	Eve2	LXEJ02005036	2682777	2711066	-	99.62	74.04
NM_001165980.1	75763	Eve2	LXEJ02005036	2675563	2711066	-	99.93	93.92
NM_001165981.1	75763	Eve2	LXEJ02005036	2672280	2711066	-	99.66	75.79
NM_001165982.1	75763	Eve2	LXEJ02005036	2687964	2711066	-	99.75	81.41
NM_177669.4	230623	Eve2	LXEJ02005793	12928	13410	-	100	58.9
NM_001166027.1	230623	Eve2	LXEJ02005793	12928	13410	-	100	34.67
NM_001166027.1	230623	Eve2	LXEJ02007887	8202	19986	+	98.52	29.14
NM_001166207.1	320752	Eve2	LXEJ02002388	24693	54713	-	100	49.05
NM_001166207.1	320752	Eve2	LXEJ02009802	730025	809577	+	99.6	51.84
NM_138654.3	192136	Eve2	LXEJ02011613	50572	100556	-	100	29.64
NM_138654.3	192136	Eve2	LXEJ02003407	6734	81364	+	98.33	17.31
NM_138654.3	192136	Eve2	LXEJ02003810	164225	314416	+	97.91	38.21
NM_001163288.2	634731	Eve2	LXEJ02009104	532342	621152	+	100	63.06
NM_001163288.2	634731	Eve2	LXEJ02007287	903750	922103	-	100	37.02
NM_172613.4	224079	Eve2	LXEJ02009971	28488	66097	+	100	34.68
NM_172613.4	224079	Eve2	LXEJ02001509	3252	29974	+	99.66	44.29
NM_172613.4	224079	Eve2	LXEJ02003528	7899	15588	+	96.88	12.32
NM_175188.4	72925	Eve2	LXEJ02009873	1406335	1617410	+	99.97	88.15
NM_175188.4	72925	Eve2	LXEJ02010621	43564	131486	+	98.97	6.6
NM_029131.3	74954	Eve2	LXEJ02008219	4725	5522	+	100	61.9
NM_029131.3	74954	Eve2	LXEJ02012238	8296	9385	-	97.79	28.08
NM_053123.4	93761	Eve2	LXEJ02006244	8118	60132	+	100	67.07
NM_053123.4	93761	Eve2	LXEJ02008539	1408216	1426826	+	100	32.97
NM_181347.3	329260	Eve2	LXEJ02001966	563	54079	+	99.73	87.36
NM_181347.3	329260	Eve2	LXEJ02011799	98335	232675	+	100	12.56
NM_001166501.1	329260	Eve2	LXEJ02001966	563	54079	+	99.73	85.93
NM_001166501.1	329260	Eve2	LXEJ02011799	94323	232675	+	100	13.98
NM_173435.3	245492	Eve2	LXEJ02000226	79456	80201	+	100	28.2
NM_147218.2	76184	Eve2	LXEJ02004097	4243312	4268625	+	99.54	33.43
NM_147218.2	76184	Eve2	LXEJ02004789	157266	200662	-	99.97	67.42
NM_001166627.1	100040531	Eve2	LXEJ02002046	342	4757	+	100	79.75
NM_001166630.1	100040563	Eve2	LXEJ02002046	342	4748	+	99.84	91.91
NM_134248.2	171283	Eve2	LXEJ02005299	1412131	1421218	+	100	66.96
NM_134248.2	171283	Eve2	LXEJ02004160	7590	9064	-	100	20.79
NM_001166631.1	171283	Eve2	LXEJ02005299	1412126	1421218	+	99.92	64.11
NM_001166631.1	171283	Eve2	LXEJ02004160	3945	9721	-	100	35.83
NM_001166632.1	171283	Eve2	LXEJ02005299	1412128	1421218	+	100	67.98
NM_001166632.1	171283	Eve2	LXEJ02004160	3945	20005	-	100	31.88
NM_175358.4	108672	Eve2	LXEJ02008381	1199859	1261074	-	100	92.23
NM_175358.4	108672	Eve2	LXEJ02008050	31634	32034	-	100	7.26
NM_001166672.1	100038909	Eve2	LXEJ02005455	16723	20799	+	98.92	87.32
NM_001166539.1	15361	Eve2	LXEJ02005299	1106007	1106281	+	100	15.61
NM_001166540.1	15361	Eve2	LXEJ02005299	1106007	1106281	+	100	16.33
NM_001166541.1	15361	Eve2	LXEJ02005299	1106007	1106281	+	100	16.7
NM_001166542.1	15361	Eve2	LXEJ02005299	1106007	1106281	+	100	16.72
NM_001166543.1	15361	Eve2	LXEJ02005299	1106007	1106281	+	100	16.04
NM_001166544.1	15361	Eve2	LXEJ02005299	1106007	1106281	+	100	16.4
NM_001166545.1	15361	Eve2	LXEJ02005299	1106007	1106281	+	100	16.26
NM_001166546.1	15361	Eve2	LXEJ02005299	1106007	1106281	+	100	16.41
NM_016660.3	15361	Eve2	LXEJ02005299	1106007	1106281	+	100	13.72
NM_001025427.3	15361	Eve2	LXEJ02005299	1106007	1106281	+	100	16.37
NM_001039356.2	15361	Eve2	LXEJ02005299	1106007	1106281	+	100	15.32
NM_001166535.1	15361	Eve2	LXEJ02005299	1106007	1106281	+	100	16.01
NM_001166536.1	15361	Eve2	LXEJ02005299	1106007	1106281	+	100	16.39
NM_001166537.1	15361	Eve2	LXEJ02005299	1106007	1106281	+	100	13.95
NM_025351.3	66098	Eve2	LXEJ02008701	14172	65376	-	99.25	59.23
NM_025351.3	66098	Eve2	LXEJ02008328	707845	792207	-	100	43.87
NM_001167736.1	66098	Eve2	LXEJ02008701	37311	65376	-	100	60.65
NM_001167736.1	66098	Eve2	LXEJ02008328	707845	766016	-	95.81	52.2
NM_021385.2	58186	Eve2	LXEJ02009216	5871	35852	+	100	56.91
NM_021385.2	58186	Eve2	LXEJ02004949	1803474	1834815	+	100	43.24
NM_001167730.1	58186	Eve2	LXEJ02009216	5869	35852	+	100	56.34
NM_001167730.1	58186	Eve2	LXEJ02004949	1803474	1835997	+	100	43.87
NM_029412.1	75740	Eve2	LXEJ02001111	34795	148909	-	99.14	73.94
NM_029412.1	75740	Eve2	LXEJ02012431	72210	72572	+	100	13.49
NM_029412.1	75740	Eve2	LXEJ02002552	162399	167658	-	99.43	13.19
NM_001167748.1	75740	Eve2	LXEJ02001111	34795	148909	-	99.02	69.27
NM_001167748.1	75740	Eve2	LXEJ02012431	72210	72572	+	100	14.41
NM_001167748.1	75740	Eve2	LXEJ02002552	162401	167658	-	99.71	14.01
NM_024260.5	73288	Eve2	LXEJ02001908	36401	51926	-	100	44.21
NM_024260.5	73288	Eve2	LXEJ02009807	200556	257618	+	99.66	39.52
NM_001167750.1	73288	Eve2	LXEJ02001908	36401	51926	-	100	58.43
NM_001167750.1	73288	Eve2	LXEJ02009807	200556	257618	+	99.66	29.45
NM_001167751.1	73288	Eve2	LXEJ02001908	38822	51926	-	100	43.02
NM_001167751.1	73288	Eve2	LXEJ02009807	200556	257618	+	99.66	40.4
NM_029335.3	75556	Eve2	LXEJ02005157	6088	11015	+	100	60.2
NM_029335.3	75556	Eve2	LXEJ02010708	3488	6698	-	99.8	39.54
NM_145499.2	226105	Eve2	LXEJ02000011	6728	33461	-	100	68.51
NM_001167876.1	242627	Eve2	LXEJ02000649	3672	100296	-	100	32.97
NM_001167876.1	242627	Eve2	LXEJ02002201	6247	19034	+	100	12.49
NM_001167876.1	242627	Eve2	LXEJ02012316	2171	58129	-	99.45	12.23
NM_001167876.1	242627	Eve2	LXEJ02009392	9114	41596	+	94.47	7.82
NM_001167878.1	242627	Eve2	LXEJ02000649	3672	100296	-	100	33.44
NM_001167878.1	242627	Eve2	LXEJ02002201	6247	19034	+	100	12.67
NM_001167878.1	242627	Eve2	LXEJ02012316	2171	58129	-	99.38	10.98
NM_001167878.1	242627	Eve2	LXEJ02009392	9114	41596	+	94.47	7.93
NM_001013820.3	434674	Eve2	LXEJ02003776	26776	36498	-	99.88	42.31
NM_001013820.3	434674	Eve2	LXEJ02008641	11912	27160	-	99.8	51.94
NM_027616.3	70950	Eve2	LXEJ02001389	65073	351950	-	100	65.51
NM_027616.3	70950	Eve2	LXEJ02001552	3315	69172	-	99.91	34.69
NM_031384.2	83558	Eve2	LXEJ02009492	3316	106591	+	99.3	44.03
NM_031384.2	83558	Eve2	LXEJ02003675	8300	21629	+	100	29.53
NM_031384.2	83558	Eve2	LXEJ02006177	652156	692239	+	98.23	22.58
NM_001167997.1	83558	Eve2	LXEJ02009492	3316	103662	+	99.82	65.19
NM_001167997.1	83558	Eve2	LXEJ02006177	652156	679300	+	100	26.45
NM_177912.4	331063	Eve2	LXEJ02000359	2049	5970	+	100	63.6
NM_001168274.1	331063	Eve2	LXEJ02000359	2049	5970	+	100	57.13
NM_172952.3	268566	Eve2	LXEJ02005666	16206	219668	+	99.82	84.82
NM_172952.3	268566	Eve2	LXEJ02010769	8177	119664	-	100	9.88
NM_145965.2	268566	Eve2	LXEJ02005666	16206	219668	+	99.82	84.86
NM_145965.2	268566	Eve2	LXEJ02010769	8177	119664	-	100	9.86
NM_027952.3	71841	Eve2	LXEJ02010696	17714	32445	-	100	89.24
NM_175500.4	103978	Eve2	LXEJ02007636	441560	1131382	-	100	48.49
NM_175500.4	103978	Eve2	LXEJ02011435	9622	10534	+	100	31.64
NM_175500.4	103978	Eve2	LXEJ02002557	18070	18644	-	100	19.93
NM_183111.2	75258	Eve2	LXEJ02007528	37110	44191	+	100	52.65
NM_183111.2	75258	Eve2	LXEJ02012113	105264	105564	-	99.33	38
NM_001168369.1	75453	Eve2	LXEJ02005598	23722	29303	-	100	35.73
NM_001168369.1	75453	Eve2	LXEJ02001832	2846	32029	+	96.46	36.47
NM_029292.3	75453	Eve2	LXEJ02005598	11185	29303	-	100	29.56
NM_029292.3	75453	Eve2	LXEJ02001832	12131	32029	+	100	46.08
NM_001168382.1	75725	Eve2	LXEJ02010700	203504	298361	-	100	45.17
NM_001168382.1	75725	Eve2	LXEJ02011676	2612	43458	-	99.42	56.1
NM_029404.3	75725	Eve2	LXEJ02010700	272605	298361	-	100	75.21
NM_029404.3	75725	Eve2	LXEJ02011676	6545	43458	-	99.89	24.87
NM_001003948.2	98496	Eve2	LXEJ02008430	212443	214663	-	99.95	83.27
NM_001003948.2	98496	Eve2	LXEJ02000119	89617	89921	+	100	11.43
NM_020261.4	56868	Eve2	LXEJ02009562	18599	24696	+	99.77	60.8
NM_018737.5	55936	Eve2	LXEJ02010713	3779636	3822894	-	99.71	69.55
NM_018737.5	55936	Eve2	LXEJ02011806	18152	73907	-	98.17	32.3
NM_001168568.1	55936	Eve2	LXEJ02010713	3779636	3822894	-	99.71	71.23
NM_001168568.1	55936	Eve2	LXEJ02011806	18152	73942	-	98.03	30.67
NM_001168569.1	55936	Eve2	LXEJ02010713	3779636	3822894	-	99.71	70.49
NM_001168569.1	55936	Eve2	LXEJ02011806	18152	73907	-	98.1	31.38
NM_001168571.1	55936	Eve2	LXEJ02010713	3779636	3823743	-	99.78	68.6
NM_001168571.1	55936	Eve2	LXEJ02011806	18152	73907	-	98.12	33.26
NM_025827.3	66887	Eve2	LXEJ02007658	4805	53823	-	100	66
NM_025827.3	66887	Eve2	LXEJ02005131	43955	51660	+	100	32.5
NM_001168591.1	66887	Eve2	LXEJ02007658	4805	26300	-	100	38.84
NM_001168591.1	66887	Eve2	LXEJ02005131	43955	51660	+	100	59.67
NM_010075.2	13483	Eve2	LXEJ02009107	736283	1012583	-	99.94	79.9
NM_010075.2	13483	Eve2	LXEJ02005041	310177	340665	+	94.54	17.87
NM_207282.3	13483	Eve2	LXEJ02009107	736283	1012583	-	99.94	82.39
NM_207282.3	13483	Eve2	LXEJ02005041	542105	549723	+	96.93	14.21
NM_001136060.2	13483	Eve2	LXEJ02009107	736283	1012583	-	99.94	85.8
NM_001136060.2	13483	Eve2	LXEJ02002663	33862	34306	+	98.42	9.75
NM_031390.2	83565	Eve2	LXEJ02006571	24795	28497	-	99.87	85.1
NM_177267.4	320808	Eve2	LXEJ02004979	20474	89296	+	100	92.72
NM_177267.4	320808	Eve2	LXEJ02004980	915523	915940	+	100	7.32
NM_001034874.3	380702	Eve2	LXEJ02009099	238763	252032	+	99.98	86.99
NM_001034874.3	380702	Eve2	LXEJ02005559	106022	129499	+	99.89	13.12
NM_028296.3	72605	Eve2	LXEJ02001618	33736	56825	+	99.94	58.03
NM_028296.3	72605	Eve2	LXEJ02001954	1477688	1885387	+	99.58	43.48
NM_011999.4	26888	Eve2	LXEJ02005734	99595	104360	-	99.79	77.34
NM_011999.4	26888	Eve2	LXEJ02007317	36559	38329	+	100	18.98
NM_001170332.1	26888	Eve2	LXEJ02005734	99595	104360	-	99.79	79.92
NM_001170332.1	26888	Eve2	LXEJ02007317	35933	38329	+	100	16.28
NM_001170333.1	26888	Eve2	LXEJ02005734	99595	104545	-	100	77.63
NM_001170333.1	26888	Eve2	LXEJ02007317	36559	41296	+	100	22.44
NM_172120.4	218035	Eve2	LXEJ02004428	97384	153762	-	100	85.32
[truncated: 1,438 more rows]

## Sheet: split_aligns
#TranscriptAccession	NCBIGeneID	Assembly	ScaffoldAccession	Start	End	Strand	% identity	% coverage
NM_207683.2	18705	GRCm38	NT_039360.8	2948	256373	+	99.47	70.03
NM_207683.2	18705	GRCm38	NT_039353.8	108811261	108854424	+	99.44	25.63
NM_053270.1	116837	GRCm38	NT_039169.8	19288422	19432843	-	99.81	49.84
NM_053270.1	116837	GRCm38	NT_039170.8	1681	339214	-	99.94	42.73
NM_183018.2	116837	GRCm38	NT_039169.8	19288422	19432843	-	99.8	48.86
NM_183018.2	116837	GRCm38	NT_039170.8	1681	339214	-	99.94	43.57
NM_001012624.1	116837	GRCm38	NT_039169.8	19288422	19432843	-	99.72	45.64
NM_001012624.1	116837	GRCm38	NT_039170.8	1681	339214	-	99.94	46.31
NM_001012623.1	116837	GRCm38	NT_039169.8	19288422	19432843	-	99.73	46.59
NM_001012623.1	116837	GRCm38	NT_039170.8	1681	339214	-	99.94	45.5
NM_001012625.1	116837	GRCm38	NT_039169.8	19288422	19432843	-	99.76	43.51
NM_001012625.1	116837	GRCm38	NT_039170.8	1681	339214	-	99.94	48.12
NM_174875.3	666468	GRCm38	NT_039718.8	9171	14742	+	98.69	62.5
NM_174875.3	666468	GRCm38	NT_039716.8	15127170	15165694	+	100	35.21
NM_030254.3	80286	GRCm38	NT_039457.8	18193689	18318700	+	97.18	78.06
NM_030254.3	80286	GRCm38	NT_039460.8	4470	12324	+	100	25.11
NM_134420.4	171429	GRCm38	NT_039477.8	7761990	7770090	+	100	81.85
NM_134420.4	171429	GRCm38	NT_039482.8	267	906	+	100	12.61
NM_177914.3	331374	GRCm38	NT_039700.8	41516	116395	+	100	95.4
NM_177914.3	331374	GRCm38	NT_039699.8	3729306	3729636	+	100	4.61
NM_177292.3	320916	GRCm38	NT_078458.7	10875	53751	+	99.86	89.28
NM_177292.3	320916	GRCm38	NT_109320.5	37391593	37392088	+	100	11.44
NM_009027.3	19418	GRCm38	NT_039589.8	37522890	37630525	-	100	76.93
NM_009027.3	19418	GRCm38	NT_039590.8	2743	111448	-	100	18.32
NM_001013813.3	270118	GRCm38	NT_039472.8	205686	295230	+	100	90.79
NM_001013813.3	270118	GRCm38	NT_039471.8	10297958	10298561	+	99.83	9.22
NM_148413.3	667663	GRCm38	NT_039202.8	19177503	19373420	+	99.04	51.43
NM_148413.3	667663	GRCm38	NT_039206.8	681	76520	+	100	49.46
NM_023566.3	17831	GRCm38	NT_039437.8	1	10083	+	100	39.72
NM_023566.3	17831	GRCm38	NT_166306.2	2628081	2642070	+	99.84	51.77
NM_033374.3	94176	GRCm38	NT_096135.6	670	102285	-	99.7	37
NM_033374.3	94176	GRCm38	NT_039515.7	31126815	31414545	-	99.97	63.54
NM_009838.2	12466	GRCm38	NT_039313.8	5077598	5084742	+	99.92	56.31
NM_009838.2	12466	GRCm38	NT_039314.8	252	1733	+	99.31	38.21
NM_011596.5	21871	GRCm38	NT_039313.8	2444	14697	+	99.85	78.42
NM_011596.5	21871	GRCm38	NT_078458.7	11093078	11110842	+	100	21.65
NM_011633.2	22033	GRCm38	NT_039189.8	8493272	8496037	-	100	43.39
NM_011633.2	22033	GRCm38	NT_039190.8	912	40823	-	99.22	51.8
NM_017478.3	54160	GRCm38	NT_039353.8	6748	93983	-	100	55.92
NM_017478.3	54160	GRCm38	NT_039340.7	27697554	27700638	-	100	44.14
NM_028708.2	74004	GRCm38	NT_166306.2	348	21717	+	100	56.68
NM_028708.2	74004	GRCm38	NT_039433.8	56689407	56780627	+	100	36.41
NM_001100451.2	77853	GRCm38	NT_039477.8	8517	12747	+	100	86.54
NM_001100451.2	77853	GRCm38	NT_039474.8	47343153	47343812	+	100	13.47
NM_053122.4	93757	GRCm38	NT_039548.8	38024090	38133662	+	98.78	35.08
NM_053122.4	93757	GRCm38	NT_039551.8	54965	381789	+	99.87	67.74
NM_198024.2	223332	GRCm38	NT_039617.8	5917949	5961992	+	100	24.98
NM_198024.2	223332	GRCm38	NT_039618.8	901	12557	+	99.96	71.43
NM_178633.3	77113	GRCm38	NT_039460.8	25586885	25640362	-	99.7	82.22
NM_178633.3	77113	GRCm38	NT_039462.8	7957	46203	-	100	19.55
NM_001033450.4	381308	GRCm38	NT_039185.8	17565641	17598300	-	95.56	87.75
NM_001033450.4	381308	GRCm38	NT_039185.8	17727598	17744303	-	100	100
NM_001301745.1	381308	GRCm38	NT_039185.8	17565641	17598300	-	95.54	87.71
NM_001301745.1	381308	GRCm38	NT_039185.8	17727598	17744303	-	100	100
NR_003279.1	236598	GRCm38	NT_039482.8	14549649	14550044	+	98.73	8.37
NR_003279.1	236598	GRCm38	NT_039573.8	6834306	6834562	-	98.44	5.43
NR_003279.1	236598	GRCm38	NT_039674.8	65692063	65692322	+	98.46	5.45
NR_003279.1	236598	GRCm38	NT_078380.6	2860339	2860826	+	98.15	10.21
NR_046233.2	100861531	GRCm38	NT_039649.8	26188385	26194217	+	98.29	43.32
NR_046233.2	100861531	GRCm38	NT_039573.8	6834306	6834558	-	98.42	1.88
NR_046233.2	100861531	GRCm38	NT_039551.8	36777070	36777378	+	97.73	2.3
NR_046233.2	100861531	GRCm38	NT_039674.8	65692066	65692322	+	98.44	1.9
NR_046233.2	100861531	GRCm38	NT_078380.6	2860339	2860826	+	98.15	3.6
NM_010816.1	17450	Eve2	LXEJ02009388	28431	100955	-	100	53.08
NM_010816.1	17450	Eve2	LXEJ02000209	3347567	3396281	+	100	30.03
NM_010816.1	17450	Eve2	LXEJ02007654	25475	45395	-	99.62	17.6
NM_018830.1	54447	Eve2	LXEJ02006267	10869	51147	+	99.97	73.99
NM_018830.1	54447	Eve2	LXEJ02007966	4658	64322	-	99.52	26.3
NM_018779.1	54611	Eve2	LXEJ02007216	13761	139018	+	99.43	71.7
NM_018779.1	54611	Eve2	LXEJ02004297	110991	112277	-	99.61	30.55
NM_019515.1	56183	Eve2	LXEJ02011386	1457	26372	+	100	72.94
NM_019515.1	56183	Eve2	LXEJ02006497	142001	147425	+	100	34.05
NM_054072.1	116731	Eve2	LXEJ02008908	410900	442400	-	100	54.49
NM_054072.1	116731	Eve2	LXEJ02011707	30042	50929	-	99.03	47.33
NM_080470.1	140557	Eve2	LXEJ02004897	1180570	1226427	+	100	73.44
NM_080470.1	140557	Eve2	LXEJ02003640	1868461	1882628	-	98.33	28.19
NM_130880.1	170711	Eve2	LXEJ02007638	2027569	2059199	-	100	72.84
NM_130880.1	170711	Eve2	LXEJ02010345	44082	296517	+	100	27.21
NM_134072.1	105387	Eve2	LXEJ02000133	7515	18883	+	99.74	80.04
NM_134072.1	105387	Eve2	LXEJ02009447	871531	877381	+	100	16.67
NM_134256.1	171405	Eve2	LXEJ02009796	9832	26952	-	100	40.41
NM_134256.1	171405	Eve2	LXEJ02009990	24396	56898	-	99.03	57.29
NM_009959.1	12941	Eve2	LXEJ02008908	410900	442400	-	100	54.93
NM_009959.1	12941	Eve2	LXEJ02011707	14395	20774	-	99.74	45.65
NM_138758.1	192289	Eve2	LXEJ02003837	23479	36676	+	99.64	61.61
NM_138758.1	192289	Eve2	LXEJ02000954	11969	39229	+	99.82	25.61
NM_029597.1	76405	Eve2	LXEJ02006114	1	4697	+	100	52.5
NM_029597.1	76405	Eve2	LXEJ02003280	1636870	1638958	+	100	39.16
NM_009961.1	12943	Eve2	LXEJ02008908	410900	442400	-	100	54.55
NM_009961.1	12943	Eve2	LXEJ02005945	24311	26711	-	99.54	45.74
NM_138662.1	192163	Eve2	LXEJ02011707	32638	35007	-	100	45.31
NM_138662.1	192163	Eve2	LXEJ02008908	410900	442413	-	99.75	54.93
NM_138661.1	192161	Eve2	LXEJ02008908	410900	442402	-	100	53.58
NM_138661.1	192161	Eve2	LXEJ02005945	31671	34151	-	100	46.45
NM_144839.1	218793	Eve2	LXEJ02007356	151315	208162	+	100	79.91
NM_144839.1	218793	Eve2	LXEJ02007172	91696	113830	-	100	19.71
NM_152915.1	227325	Eve2	LXEJ02000119	3389	4428	+	100	28.63
NM_152915.1	227325	Eve2	LXEJ02008442	3912	119709	-	98.98	37.33
NM_152915.1	227325	Eve2	LXEJ02008062	12580	74465	+	96.28	24.45
NM_152915.1	227325	Eve2	LXEJ02002978	18110	93357	-	95.29	14.3
NM_153417.1	225997	Eve2	LXEJ02011268	2552	98799	+	100	82.25
NM_153417.1	225997	Eve2	LXEJ02000003	3358636	3410853	+	99.93	23.31
NM_009957.1	12939	Eve2	LXEJ02008908	410900	442402	-	99.96	54.88
NM_009957.1	12939	Eve2	LXEJ02011707	4936	7290	-	100	45.15
NM_009960.1	12942	Eve2	LXEJ02008908	410900	442403	-	100	54.49
NM_009960.1	12942	Eve2	LXEJ02005945	18780	21173	-	100	45.56
NM_026254.2	67581	Eve2	LXEJ02008991	5610	35714	+	99.96	80.91
NM_026254.2	67581	Eve2	LXEJ02005113	355233	378495	+	99.85	19.15
NM_138674.2	192190	Eve2	LXEJ02001195	51559	175183	-	99.98	96.77
NM_138674.2	192190	Eve2	LXEJ02006357	139818	149711	+	100	3.27
NM_028295.1	72599	Eve2	LXEJ02012166	503914	544756	-	100	64.4
NM_028295.1	72599	Eve2	LXEJ02004508	155365	196836	+	100	35.38
NM_138663.2	192164	Eve2	LXEJ02008908	410900	442400	-	100	54.43
NM_138663.2	192164	Eve2	LXEJ02005945	9408	11801	-	100	45.56
NM_181323.2	231293	Eve2	LXEJ02007368	3391	38769	-	100	84.96
NM_181323.2	231293	Eve2	LXEJ02002368	4552	4961	-	100	15.11
NM_019667.2	56324	Eve2	LXEJ02006532	2668570	2671303	-	100	66.29
NM_019667.2	56324	Eve2	LXEJ02001198	2649	44664	-	100	33.75
NM_028231.2	72413	Eve2	LXEJ02006635	1669	23019	-	100	84.78
NM_028231.2	72413	Eve2	LXEJ02000538	5784	259224	-	98.9	15.4
NM_019971.2	54635	Eve2	LXEJ02011351	36987	142768	+	99.91	68.36
NM_019971.2	54635	Eve2	LXEJ02003275	289445	290586	+	99.91	32.51
NM_010031.2	13216	Eve2	LXEJ02011560	20731	20934	+	94.11	48.57
NM_010031.2	13216	Eve2	LXEJ02009658	8046	8250	-	89.47	48
NM_010941.3	18194	Eve2	LXEJ02012609	118036	127402	-	100	79.89
NM_010941.3	18194	Eve2	LXEJ02009335	176024	187297	+	98.91	20.78
NM_130457.2	170571	Eve2	LXEJ02010620	8499	49500	+	100	49.21
NM_130457.2	170571	Eve2	LXEJ02009553	15103	136076	+	99.94	34.73
NM_130457.2	170571	Eve2	LXEJ02010926	6204	18761	+	100	9.95
NM_130457.2	170571	Eve2	LXEJ02012472	79038	125504	+	99.66	6.1
NM_009065.2	19762	Eve2	LXEJ02005137	1008956	1277802	-	100	84.01
NM_009065.2	19762	Eve2	LXEJ02006233	37497	48505	+	99.66	16.15
NM_182841.1	231503	Eve2	LXEJ02011584	83885	101708	-	100	88.91
NM_182841.1	231503	Eve2	LXEJ02009843	62747	86350	+	95.5	14.09
NM_183024.1	242570	Eve2	LXEJ02008852	3100339	3122812	-	99.79	72.03
NM_183024.1	242570	Eve2	LXEJ02001580	39666	101961	+	99.91	30.7
NM_178358.3	237091	Eve2	LXEJ02001653	24601	25569	+	100	54.62
NM_178358.3	237091	Eve2	LXEJ02001031	365061	396764	+	99.4	46.25
NM_026184.2	67475	Eve2	LXEJ02001750	53174	71922	-	98.92	83.13
NM_026184.2	67475	Eve2	LXEJ02000840	2111573	2136719	+	100	20.39
NM_198620.1	242819	Eve2	LXEJ02007650	101340	139776	-	100	73.6
NM_198620.1	242819	Eve2	LXEJ02009901	19332	94042	+	99.89	26.24
NM_030014.2	77963	Eve2	LXEJ02002541	8535	43174	+	100	93.77
NM_030014.2	77963	Eve2	LXEJ02012358	1796103	1803203	+	99.26	6.37
NM_027193.2	69740	Eve2	LXEJ02005105	2441286	2445405	-	100	61.46
NM_027193.2	69740	Eve2	LXEJ02011071	3008	30090	-	99.83	37.88
NM_199446.1	102093	Eve2	LXEJ02005760	3073	92804	+	99.96	67.57
NM_199446.1	102093	Eve2	LXEJ02012001	668908	729857	-	100	15.75
NM_199446.1	102093	Eve2	LXEJ02001228	4851	31529	-	98.61	13.9
NM_145476.2	223754	Eve2	LXEJ02004937	425238	611995	-	100	68.68
NM_145476.2	223754	Eve2	LXEJ02004897	209	97551	-	99.91	34.69
NM_010615.1	16551	Eve2	LXEJ02004466	196878	234505	-	99.97	94.6
NM_010615.1	16551	Eve2	LXEJ02007871	2100	2364	-	100	5.46
NM_011625.1	21981	Eve2	LXEJ02005049	1122887	1140859	-	100	87.58
NM_011625.1	21981	Eve2	LXEJ02008195	147642	197483	+	100	12.42
NM_207683.2	18705	Eve2	LXEJ02005671	3106	256504	+	99.41	70.13
NM_207683.2	18705	Eve2	LXEJ02004495	200685	254833	+	99.46	26.58
NM_001001178.1	227933	Eve2	LXEJ02004702	50651	58826	+	99.95	57.81
NM_001001178.1	227933	Eve2	LXEJ02006919	1911946	2397254	+	96.39	51.06
NM_172987.2	269513	Eve2	LXEJ02009818	72109	111315	+	100	78.44
NM_172987.2	269513	Eve2	LXEJ02001194	24455	24861	+	100	14
NM_201243.1	353235	Eve2	LXEJ02008908	410900	442402	-	100	54.59
NM_201243.1	353235	Eve2	LXEJ02005945	37183	39564	-	100	45.44
NM_001003671.1	353236	Eve2	LXEJ02008908	410900	442400	-	100	54
NM_001003671.1	353236	Eve2	LXEJ02006739	183378	196328	-	99.95	46.2
NM_199064.1	385312	Eve2	LXEJ02011045	29001	33038	-	100	42.53
NM_199064.1	385312	Eve2	LXEJ02003055	44027	49345	+	95.53	66.36
NM_194058.2	243874	Eve2	LXEJ02005470	1233453	1275024	+	100	89.47
NM_194058.2	243874	Eve2	LXEJ02002173	22447	22798	-	100	10.52
NM_001004761.1	241263	Eve2	LXEJ02002009	11253	58766	-	100	69.2
NM_001004761.1	241263	Eve2	LXEJ02001910	118881	120472	-	100	22.28
NM_001004761.1	241263	Eve2	LXEJ02003868	55959	86972	+	97.78	4.98
NM_148926.2	21769	Eve2	LXEJ02004931	2965288	2982743	-	100	82.95
NM_148926.2	21769	Eve2	LXEJ02005269	657810	788531	+	100	16.74
NM_001005787.1	12695	Eve2	LXEJ02008866	7784	46424	+	100	68.52
NM_001005787.1	12695	Eve2	LXEJ02007416	299	94634	-	99.35	31.95
NM_172696.2	12695	Eve2	LXEJ02006180	9075	136716	-	100	49.89
NM_172696.2	12695	Eve2	LXEJ02008866	7784	61535	+	99.45	17.56
NM_172696.2	12695	Eve2	LXEJ02007416	299	117876	-	99.17	11.62
NM_007704.2	12695	Eve2	LXEJ02008866	7784	61535	+	99.45	33.28
NM_007704.2	12695	Eve2	LXEJ02007416	299	94634	-	99.35	24.02
NM_001007552.1	493583	Eve2	LXEJ02005087	330537	336691	+	95.45	75.61
NM_001007552.1	493583	Eve2	LXEJ02005061	847	1117	+	91.2	23.93
NM_177816.3	328381	Eve2	LXEJ02009325	1996	28718	+	100	50.61
NM_177816.3	328381	Eve2	LXEJ02011072	347410	379781	+	100	49.38
NM_001013816.1	434459	Eve2	LXEJ02001998	177	7129	+	99.45	70.08
NM_001013816.1	434459	Eve2	LXEJ02010795	13677	17051	+	100	21.81
NM_175353.2	107371	Eve2	LXEJ02004466	6725	68346	-	99.65	74.27
NM_175353.2	107371	Eve2	LXEJ02005271	4613	68361	+	96.78	31.6
NM_007958.1	13990	Eve2	LXEJ02002262	64299	75609	-	99.95	46.44
NM_007958.1	13990	Eve2	LXEJ02006875	59654	116408	+	99.31	54.59
NM_001017427.1	242505	Eve2	LXEJ02005445	4088	39471	+	99.86	86.26
NM_001017427.1	242505	Eve2	LXEJ02004140	13402	44312	+	99.86	13.96
NM_023154.3	66071	Eve2	LXEJ02002326	2384	17680	+	100	82.14
NM_023154.3	66071	Eve2	LXEJ02001962	416976	417240	+	100	17.7
NM_053105.2	93688	Eve2	LXEJ02000983	49489	97135	-	99.59	42.31
NM_053105.2	93688	Eve2	LXEJ02009809	5606224	5607451	-	99.83	30.04
NM_053105.2	93688	Eve2	LXEJ02009649	7166	86164	-	99.52	15.46
NM_053105.2	93688	Eve2	LXEJ02007395	19192	89256	-	96.51	15.21
NM_175013.2	226041	Eve2	LXEJ02008383	727551	873727	-	100	94.04
NM_175013.2	226041	Eve2	LXEJ02003051	5021	32120	-	100	6
NM_008632.2	17756	Eve2	LXEJ02006725	73990	194364	-	99.36	95.76
NM_008632.2	17756	Eve2	LXEJ02008881	119974	196360	+	100	5.19
NM_020505.2	57257	Eve2	LXEJ02001769	1363056	1717417	+	99.5	72.55
NM_020505.2	57257	Eve2	LXEJ02006200	35917	119510	-	99.93	29.12
NM_177164.3	320460	Eve2	LXEJ02000934	3463	6794	+	100	71.57
NM_177164.3	320460	Eve2	LXEJ02010625	753190	807571	+	99.26	29.34
NM_008434.2	16535	Eve2	LXEJ02001596	7756	252060	+	100	80.88
NM_008434.2	16535	Eve2	LXEJ02008339	323972	368770	+	98.84	19.88
NM_001025581.1	268345	Eve2	LXEJ02003724	41734	52429	-	99.98	87.68
NM_001025581.1	268345	Eve2	LXEJ02002159	103184	109909	+	97.54	13.7
NM_033605.2	93837	Eve2	LXEJ02001516	32307	163984	+	100	68.08
NM_033605.2	93837	Eve2	LXEJ02002156	20636	21315	+	100	22.56
NM_026189.3	67484	Eve2	LXEJ02001151	55529	168686	+	100	73.37
NM_026189.3	67484	Eve2	LXEJ02006612	96065	96769	+	100	26.37
NM_029851.2	110350	Eve2	LXEJ02008330	117763	368157	+	99.73	93.23
NM_029851.2	110350	Eve2	LXEJ02007575	222	16024	-	96.88	7.85
NM_174875.3	666468	Eve2	LXEJ02007435	1005357	1053053	+	99.87	35.72
NM_174875.3	666468	Eve2	LXEJ02009875	4603	10174	+	98.69	62.5
NM_010305.1	14677	Eve2	LXEJ02001757	177853	280855	+	99.79	91.85
NM_010305.1	14677	Eve2	LXEJ02009331	10910	13006	+	100	8.98
NM_028372.1	72852	Eve2	LXEJ02004993	30031	33346	+	99.96	85.41
NM_028372.1	72852	Eve2	LXEJ02008297	5451	6024	-	99.47	14.79
NM_173030.2	271786	Eve2	LXEJ02003936	78466	161836	-	99.46	78.13
NM_173030.2	271786	Eve2	LXEJ02002550	9599	35169	-	100	9.53
NM_173030.2	271786	Eve2	LXEJ02003449	369502	450085	+	99.7	9.66
NM_011668.2	22215	Eve2	LXEJ02003827	9213	69005	-	100	58.09
NM_011668.2	22215	Eve2	LXEJ02003850	5354	8427	+	99.8	40.72
NM_001033962.1	22215	Eve2	LXEJ02003827	9213	69005	-	100	56.49
NM_001033962.1	22215	Eve2	LXEJ02003850	5354	8427	+	99.8	42.28
NM_019776.2	56463	Eve2	LXEJ02010503	18897	239161	+	99.95	58.12
NM_019776.2	56463	Eve2	LXEJ02001764	294410	448411	+	98.87	43.3
NM_011652.3	22138	Eve2	LXEJ02001191	779	251875	+	100	97.73
NM_011652.3	22138	Eve2	LXEJ02005156	259641	277716	+	100	2.26
NM_028004.2	22138	Eve2	LXEJ02001191	779	251875	+	100	97.36
NM_028004.2	22138	Eve2	LXEJ02005156	259641	277716	+	100	2.64
NM_001035242.1	226025	Eve2	LXEJ02007289	17754	150953	+	100	80.91
NM_001035242.1	226025	Eve2	LXEJ02003732	53159	149184	+	99.9	16.37
NM_001035244.1	226025	Eve2	LXEJ02007289	17754	87574	+	100	61.59
NM_001035244.1	226025	Eve2	LXEJ02003732	48359	149184	+	100	38.4
NM_001037321.1	207215	Eve2	LXEJ02003293	6203	6591	-	100	15.44
NM_001037321.1	207215	Eve2	LXEJ02002835	2396190	2404249	-	99.33	71.88
NM_001037321.1	207215	Eve2	LXEJ02005025	1	2966	+	100	16.87
NM_001037865.1	213945	Eve2	LXEJ02001763	304059	457402	-	99.65	54.65
NM_001037865.1	213945	Eve2	LXEJ02008047	7952	33035	+	99.84	46.57
NM_001038619.1	103967	Eve2	LXEJ02008027	46853	79545	+	100	72.07
NM_001038619.1	103967	Eve2	LXEJ02012492	6324	53619	-	100	12.74
NM_001038619.1	103967	Eve2	LXEJ02010606	11427	136021	+	99.75	10.63
NM_010316.3	14704	Eve2	LXEJ02006816	114529	115768	-	99.91	72.98
NM_010316.3	14704	Eve2	LXEJ02005280	3	1076	-	100	26.78
NM_001039195.1	14800	Eve2	LXEJ02001537	2421	52125	+	99.96	81.78
NM_001039195.1	14800	Eve2	LXEJ02003275	54685	55831	-	100	18.21
NM_013540.2	14800	Eve2	LXEJ02001537	2421	58681	+	99.98	90.7
NM_013540.2	14800	Eve2	LXEJ02003275	54685	55831	-	100	9.29
NM_177845.4	329502	Eve2	LXEJ02004927	15283	49164	+	99.89	85.81
NM_177845.4	329502	Eve2	LXEJ02004926	297019	297669	+	100	14.54
NM_177406.3	277753	Eve2	LXEJ02006542	3845	10488	-	99.67	76.54
NM_177406.3	277753	Eve2	LXEJ02000445	95951	98944	+	100	24.23
NM_172306.2	13118	Eve2	LXEJ02004115	104466	111059	-	100	76.53
NM_172306.2	13118	Eve2	LXEJ02010214	13066	16040	-	100	23.54
NM_027830.2	71567	Eve2	LXEJ02008340	804767	830899	-	100	58.3
NM_027830.2	71567	Eve2	LXEJ02006612	34372	53511	-	100	41.82
NM_007592.3	12319	Eve2	LXEJ02001200	6137	54032	+	99.96	91.2
NM_007592.3	12319	Eve2	LXEJ02010267	21095	50085	+	97.74	10.06
NM_007936.3	13838	Eve2	LXEJ02002729	42568	120393	+	100	86.12
NM_007936.3	13838	Eve2	LXEJ02005040	7189	27931	-	98.07	15.48
NM_001039534.1	214580	Eve2	LXEJ02012132	844	4768	+	98.52	35.57
NM_001039534.1	214580	Eve2	LXEJ02004976	1661127	1664310	+	95.78	69.64
NM_026331.3	67712	Eve2	LXEJ02010241	15455	23235	+	99.92	91.27
NM_026331.3	67712	Eve2	LXEJ02005478	33083	33454	-	100	8.93
NM_011158.3	19088	Eve2	LXEJ02005090	428679	464088	+	99.96	84.18
NM_011158.3	19088	Eve2	LXEJ02000792	115778	138456	+	98.03	16.4
NM_001039934.1	17756	Eve2	LXEJ02006725	73990	194364	-	99.37	95.83
NM_001039934.1	17756	Eve2	LXEJ02008881	119974	196360	+	100	5.11
NM_013454.3	11303	Eve2	LXEJ02011544	1721	102432	-	99.96	49
NM_013454.3	11303	Eve2	LXEJ02012046	67026	87331	-	99.79	51.29
NM_153820.3	76117	Eve2	LXEJ02002603	225647	290590	-	100	53.92
NM_153820.3	76117	Eve2	LXEJ02004101	24467	417950	-	100	37.88
NM_053242.4	114142	Eve2	LXEJ02012158	10045	367587	-	99.9	91.95
NM_053242.4	114142	Eve2	LXEJ02003457	4596	28975	-	96.13	8
NM_001035239.2	226025	Eve2	LXEJ02007289	17754	150953	+	100	81.01
NM_001035239.2	226025	Eve2	LXEJ02003732	53159	149184	+	99.9	16.28
NM_001035240.2	226025	Eve2	LXEJ02007289	17754	150953	+	100	81.01
NM_001035240.2	226025	Eve2	LXEJ02003732	53159	149184	+	99.9	16.28
NM_001035241.2	226025	Eve2	LXEJ02007289	17754	150953	+	100	80.92
NM_001035241.2	226025	Eve2	LXEJ02003732	53159	149184	+	99.9	16.35
NM_001035243.2	226025	Eve2	LXEJ02007289	17754	150953	+	100	80.82
NM_001035243.2	226025	Eve2	LXEJ02003732	53159	149184	+	99.9	16.44
NM_009888.3	12628	Eve2	LXEJ02004450	5215	39411	+	100	65.06
NM_009888.3	12628	Eve2	LXEJ02004738	4527	69360	-	99.26	43.66
NM_001034907.2	547176	Eve2	LXEJ02004215	330290	359991	-	100	81.84
NM_001034907.2	547176	Eve2	LXEJ02009332	4038	34328	-	100	15.92
NM_001042558.1	11783	Eve2	LXEJ02007087	4847	39378	+	100	52.2
NM_001042558.1	11783	Eve2	LXEJ02012539	175494	228927	+	99.34	49.03
NM_009684.2	11783	Eve2	LXEJ02007087	4847	39378	+	100	52.54
NM_009684.2	11783	Eve2	LXEJ02012539	175494	228927	+	99.33	48.69
NM_007439.2	11682	Eve2	LXEJ02007442	483674	995107	-	100	78.38
NM_007439.2	11682	Eve2	LXEJ02002458	165097	166397	-	99.46	21.93
NM_028938.2	74435	Eve2	LXEJ02002134	114364	144730	-	100	58.22
NM_028938.2	74435	Eve2	LXEJ02001189	448308	484377	+	99.82	41.96
NM_007697.2	12661	Eve2	LXEJ02009648	64315	155477	+	99.91	95.74
NM_007697.2	12661	Eve2	LXEJ02011078	28110	77351	+	100	4.46
NM_009399.3	21934	Eve2	LXEJ02003804	263989	267461	-	99.79	69.11
NM_009399.3	21934	Eve2	LXEJ02009299	772747	819756	+	100	31.08
NM_011682.4	22288	Eve2	LXEJ02011261	330032	790443	-	100	83.58
NM_011682.4	22288	Eve2	LXEJ02011206	8558	11910	+	100	16.41
NM_177387.3	338362	Eve2	LXEJ02006705	59700	103141	-	99.81	74.25
NM_177387.3	338362	Eve2	LXEJ02000796	90947	112453	+	98.01	17.46
NM_026072.1	67285	Eve2	LXEJ02001093	81630	122080	+	99.91	62.15
NM_026072.1	67285	Eve2	LXEJ02009292	955008	1067488	-	96.23	47.5
NM_018818.2	12662	Eve2	LXEJ02008730	13715	59886	+	100	6.98
NM_018818.2	12662	Eve2	LXEJ02011233	2439	6050	+	91.87	72.94
NM_175549.4	268902	Eve2	LXEJ02009105	157247	321915	-	100	95.17
NM_175549.4	268902	Eve2	LXEJ02002991	141608	141955	-	97.98	4.31
NM_011920.3	26357	Eve2	LXEJ02007199	53220	90031	+	100	82.45
NM_011920.3	26357	Eve2	LXEJ02002077	551	977	+	96.75	16.84
NM_001034013.2	11418	Eve2	LXEJ02004833	461087	552461	+	100	70.97
NM_001034013.2	11418	Eve2	LXEJ02010489	154439	155213	+	99.74	29.32
NM_175331.3	103466	Eve2	LXEJ02003808	889	34495	+	99.98	94.84
NM_175331.3	103466	Eve2	LXEJ02002348	19585	19891	-	100	5.14
NM_010748.2	17101	Eve2	LXEJ02000840	3143786	3266237	+	100	80.09
NM_010748.2	17101	Eve2	LXEJ02006756	105542	125671	-	100	9.35
NM_010748.2	17101	Eve2	LXEJ02012596	9911	36244	+	99.68	10.69
NM_008729.2	18163	Eve2	LXEJ02006305	48976	57620	-	100	33.78
NM_008729.2	18163	Eve2	LXEJ02002906	25903	223669	-	100	25.77
NM_008729.2	18163	Eve2	LXEJ02003815	43555	44136	-	99.31	9.76
NM_008729.2	18163	Eve2	LXEJ02000574	34965	123097	+	98.18	24.83
NM_010230.2	14260	Eve2	LXEJ02012030	1	191137	+	100	75.63
NM_010230.2	14260	Eve2	LXEJ02008334	2623	200812	-	99.93	27.18
NM_029148.1	52837	Eve2	LXEJ02000708	5791	24085	+	99.78	89.64
NM_029148.1	52837	Eve2	LXEJ02003690	15975	39538	+	100	11.08
NM_177690.3	232827	Eve2	LXEJ02008687	7377	40935	-	100	80.52
NM_177690.3	232827	Eve2	LXEJ02012078	24095	34356	-	100	19.5
NM_011348.2	20349	Eve2	LXEJ02005629	5531	53794	+	99.81	84.65
NM_011348.2	20349	Eve2	LXEJ02008907	9301	148870	-	99.2	16.35
NM_025822.3	66880	Eve2	LXEJ02001221	52354	60850	-	100	75.64
NM_025822.3	66880	Eve2	LXEJ02002319	1463966	1561248	-	98.46	19.89
NM_001008973.2	381107	Eve2	LXEJ02009095	2897064	2959472	+	100	30.32
NM_001008973.2	381107	Eve2	LXEJ02008289	27566	36858	+	100	26.85
NM_001008973.2	381107	Eve2	LXEJ02011956	1830	86412	+	97.39	40.95
NM_152809.2	70425	Eve2	LXEJ02005019	722901	783015	-	100	88.93
NM_152809.2	70425	Eve2	LXEJ02010752	4393	4882	-	99.79	11.15
NM_023906.3	65257	Eve2	LXEJ02000293	48926	96169	-	100	83.31
NM_023906.3	65257	Eve2	LXEJ02009098	545308	625643	+	95.63	18.72
NM_011282.2	19886	Eve2	LXEJ02002782	3359248	3411258	-	100	34.86
NM_011282.2	19886	Eve2	LXEJ02003543	491	18034	-	99.89	24.87
NM_011282.2	19886	Eve2	LXEJ02002144	47701	52812	-	100	7.63
NM_011282.2	19886	Eve2	LXEJ02004310	7021	52909	+	98.85	31.67
NM_007733.2	12823	Eve2	LXEJ02002111	3626	84642	+	99.9	86.47
NM_007733.2	12823	Eve2	LXEJ02007732	7189	86444	-	100	10.83
NM_007733.2	12823	Eve2	LXEJ02000751	33011	119955	-	100	2.41
NM_029509.4	76074	Eve2	LXEJ02001476	101480	106171	-	100	71.45
NM_029509.4	76074	Eve2	LXEJ02011286	33548	36247	+	100	11.02
NM_029509.4	76074	Eve2	LXEJ02010093	8314	19533	+	99.77	17.89
NM_025985.4	67128	Eve2	LXEJ02008759	54146	77556	+	100	90.3
NM_025985.4	67128	Eve2	LXEJ02004858	12633	13007	-	100	9.77
NM_032007.3	83996	Eve2	LXEJ02011948	67761	70957	-	100	53.88
NM_032007.3	83996	Eve2	LXEJ02001165	23082	26453	+	100	46.36
NM_010146.2	13853	Eve2	LXEJ02004889	63277	129940	-	100	69.97
NM_010146.2	13853	Eve2	LXEJ02006372	28696	29025	-	99.39	30.58
NM_175173.3	71682	Eve2	LXEJ02006021	12840	79869	-	99.95	85.57
NM_175173.3	71682	Eve2	LXEJ02010468	17207	51430	+	98.5	16.96
NM_178259.3	268379	Eve2	LXEJ02003633	2253	168245	-	99.94	63.45
NM_178259.3	268379	Eve2	LXEJ02004029	66090	299001	-	99.97	26.31
NM_178259.3	268379	Eve2	LXEJ02003167	16179	81857	-	99.76	10.6
NM_198111.2	238161	Eve2	LXEJ02011991	1561419	2016876	-	99.92	95.21
NM_198111.2	238161	Eve2	LXEJ02003314	18393	117072	-	99.81	5.31
NM_011077.2	18675	Eve2	LXEJ02010222	16688	125069	+	100	69.16
NM_011077.2	18675	Eve2	LXEJ02000537	2678	127633	-	96.94	35.75
NM_008517.2	16993	Eve2	LXEJ02004172	2282487	2298634	-	99.47	64.47
NM_008517.2	16993	Eve2	LXEJ02002694	1075	14842	-	100	36.39
NM_008855.2	18751	Eve2	LXEJ02005172	273045	369330	-	99.9	87.41
NM_008855.2	18751	Eve2	LXEJ02005304	6803	246233	-	100	12.88
NM_008174.2	14823	Eve2	LXEJ02012661	67858	76613	-	99.88	23.96
NM_008174.2	14823	Eve2	LXEJ02006932	61854	787711	+	99.05	74.19
NM_133207.2	170738	Eve2	LXEJ02001498	184695	729630	+	99.41	85.57
NM_133207.2	170738	Eve2	LXEJ02007725	10868	24575	-	100	17.56
NM_008074.2	14407	Eve2	LXEJ02007094	1514893	2180179	+	99.41	81.41
NM_008074.2	14407	Eve2	LXEJ02001650	26198	35556	-	97.52	21.57
NM_011261.2	19699	Eve2	LXEJ02009094	617575	814094	-	100	87.68
NM_011261.2	19699	Eve2	LXEJ02005848	23186	80992	+	100	5.45
NM_011261.2	19699	Eve2	LXEJ02006916	49115	117166	+	99.7	5.77
NM_009390.2	21892	Eve2	LXEJ02001384	79186	189417	+	100	84.19
NM_009390.2	21892	Eve2	LXEJ02011778	83022	83799	+	99.87	15.78
NM_007400.2	11489	Eve2	LXEJ02012184	74157	217805	+	99.98	93.87
NM_007400.2	11489	Eve2	LXEJ02007990	1222354	1274570	+	100	5.34
NM_010158.2	13992	Eve2	LXEJ02011364	50981	149415	-	100	78.14
NM_010158.2	13992	Eve2	LXEJ02007742	38118	68281	+	95.16	28.3
NM_008481.2	16773	Eve2	LXEJ02007095	174482	829853	+	99.83	85.57
NM_008481.2	16773	Eve2	LXEJ02012204	5309	90824	+	99.63	11.12
NM_008481.2	16773	Eve2	LXEJ02006085	34823	44257	+	98.32	4.29
NM_008779.2	18488	Eve2	LXEJ02007885	10764	18149	+	100	46.2
NM_008779.2	18488	Eve2	LXEJ02011884	2512	93534	-	99.89	38.52
NM_008779.2	18488	Eve2	LXEJ02003443	7773	78368	-	95.69	10.14
NM_007772.2	110521	Eve2	LXEJ02009302	1969518	2031381	-	100	97.58
NM_007772.2	110521	Eve2	LXEJ02007684	68966	140204	+	100	3.05
NM_001077687.1	80877	Eve2	LXEJ02000914	34478	256998	+	99.55	30.4
NM_001077687.1	80877	Eve2	LXEJ02008490	1862	105533	-	99.77	34.58
NM_001077687.1	80877	Eve2	LXEJ02000329	15156	135534	+	99.41	36.47
NM_001077688.1	80877	Eve2	LXEJ02000914	34478	287255	+	99.62	34.51
NM_001077688.1	80877	Eve2	LXEJ02008490	1862	105533	-	99.77	32.64
NM_001077688.1	80877	Eve2	LXEJ02000329	15156	112518	+	99.93	33.71
NM_030695.2	80877	Eve2	LXEJ02000914	34478	292974	+	99.65	37.79
NM_030695.2	80877	Eve2	LXEJ02008490	1862	105533	-	99.77	30.94
NM_030695.2	80877	Eve2	LXEJ02000329	15156	143488	+	99.35	32.83
NM_009782.3	12290	Eve2	LXEJ02004067	3280	61867	+	100	70.63
NM_009782.3	12290	Eve2	LXEJ02005487	12695	40392	-	100	21.04
NM_009782.3	12290	Eve2	LXEJ02004182	661066	852199	-	96.43	9.98
NM_172648.3	226695	Eve2	LXEJ02005660	2586	7812	-	100	44.01
NM_172648.3	226695	Eve2	LXEJ02004078	221	5894	+	99.34	56.91
NM_172290.3	235106	Eve2	LXEJ02008899	1403900	1827863	-	99.49	86.94
NM_172290.3	235106	Eve2	LXEJ02004836	6539824	6540109	+	100	15.81
NM_170778.2	99586	Eve2	LXEJ02006735	21815	600982	+	99.62	54.72
NM_170778.2	99586	Eve2	LXEJ02010405	37135	88454	-	98.68	41.04
NM_025700.2	66681	Eve2	LXEJ02012074	4562	28042	-	99.83	82.46
NM_025700.2	66681	Eve2	LXEJ02002887	3811713	3812100	-	100	17.8
NM_026904.2	68999	Eve2	LXEJ02009988	14461	16853	+	99.95	85.4
NM_026904.2	68999	Eve2	LXEJ02005833	24691	42176	-	94.52	16.63
NM_025696.3	66673	Eve2	LXEJ02005106	1362622	1769766	-	100	86.27
NM_025696.3	66673	Eve2	LXEJ02004103	2169234	2170010	+	99.87	13.79
NM_177230.3	320696	Eve2	LXEJ02001489	8822	61402	-	100	87.18
NM_177230.3	320696	Eve2	LXEJ02004060	2153	6463	+	100	12.87
NM_177233.5	320701	Eve2	LXEJ02010726	38645	71352	-	100	75.52
NM_177233.5	320701	Eve2	LXEJ02012463	39120	85163	-	99.63	24.88
NM_021879.2	18431	Eve2	LXEJ02004435	11441	103733	-	100	66.25
NM_021879.2	18431	Eve2	LXEJ02006037	9995	82289	+	100	15.51
NM_021879.2	18431	Eve2	LXEJ02009725	36892	37472	-	100	18.62
NM_177328.3	108073	Eve2	LXEJ02012350	5578	371851	+	99.73	63.59
NM_177328.3	108073	Eve2	LXEJ02009883	195327	202786	-	99.63	19.44
NM_177328.3	108073	Eve2	LXEJ02004498	78016	91736	-	99.67	7.27
NM_009148.3	20336	Eve2	LXEJ02003994	45346	238256	+	98.17	39.26
NM_009148.3	20336	Eve2	LXEJ02008736	1378300	1593326	-	100	59.22
NM_009149.2	20340	Eve2	LXEJ02002841	2497630	2541633	-	100	88.86
NM_009149.2	20340	Eve2	LXEJ02008121	7261	7692	-	100	11.13
NM_019880.3	56462	Eve2	LXEJ02004911	3418481	3429350	-	98.82	79.14
NM_019880.3	56462	Eve2	LXEJ02005269	296	752	-	98.46	23.82
NM_029585.3	76375	Eve2	LXEJ02002837	3335393	3348498	+	99.93	71.4
NM_029585.3	76375	Eve2	LXEJ02002498	406263	406907	-	99.68	29.09
NM_019514.3	56079	Eve2	LXEJ02007989	34372	416012	+	100	35.29
NM_019514.3	56079	Eve2	LXEJ02011264	25822	187796	+	100	34.2
NM_019514.3	56079	Eve2	LXEJ02000269	25952	126548	+	98.11	14.78
NM_019514.3	56079	Eve2	LXEJ02010898	13418	43354	-	95.49	17
NM_019496.3	56068	Eve2	LXEJ02007024	41787	47284	-	100	75.97
NM_019496.3	56068	Eve2	LXEJ02010704	18533	28902	-	97.62	18.65
NM_016909.2	53424	Eve2	LXEJ02004901	2253564	2263248	-	100	81.76
NM_016909.2	53424	Eve2	LXEJ02005851	4740	7512	-	100	18.23
NM_013657.5	20348	Eve2	LXEJ02004818	3410775	3487341	+	100	94.14
NM_013657.5	20348	Eve2	LXEJ02009186	11581	36333	-	93.67	8.15
NM_198612.2	232313	Eve2	LXEJ02011720	28457	50425	+	100	60.95
NM_198612.2	232313	Eve2	LXEJ02012463	3733280	3779071	+	100	39.1
NM_008167.2	14804	Eve2	LXEJ02008958	141984	1569689	-	99.49	72.18
NM_008167.2	14804	Eve2	LXEJ02007606	58980	76633	-	100	9.32
NM_008167.2	14804	Eve2	LXEJ02006751	32386	32711	-	98.77	10.71
NM_008167.2	14804	Eve2	LXEJ02012395	6100	63009	-	95.09	11.97
NM_198702.2	319387	Eve2	LXEJ02001024	1956158	2027821	-	100	42.94
NM_198702.2	319387	Eve2	LXEJ02008157	14634	553991	-	99.8	34.42
NM_198702.2	319387	Eve2	LXEJ02008216	2004	57146	-	98.71	24.13
NM_013829.2	18798	Eve2	LXEJ02006529	1085874	1331933	+	100	80.57
NM_013829.2	18798	Eve2	LXEJ02005217	296	24447	+	98.68	20.5
NM_013927.2	30952	Eve2	LXEJ02001194	1315482	1430793	-	99.97	77.82
NM_013927.2	30952	Eve2	LXEJ02009699	11135	105519	-	100	20.43
NM_001037906.2	338352	Eve2	LXEJ02007874	29956	332534	+	99.92	48
NM_001037906.2	338352	Eve2	LXEJ02004869	23505	37134	+	99.75	14.43
NM_001037906.2	338352	Eve2	LXEJ02005993	2871	60957	-	99.69	11.62
NM_001037906.2	338352	Eve2	LXEJ02001931	8392	38403	+	99.35	10.98
NM_207109.2	56079	Eve2	LXEJ02007989	34371	416012	+	100	34.17
NM_207109.2	56079	Eve2	LXEJ02011264	25822	187796	+	100	33.09
NM_207109.2	56079	Eve2	LXEJ02000269	25952	126548	+	98.25	14.24
NM_207109.2	56079	Eve2	LXEJ02010898	13418	43354	-	96.08	15.79
NM_130886.3	170720	Eve2	LXEJ02004974	353454	374697	-	100	74.81
NM_130886.3	170720	Eve2	LXEJ02004893	4312333	4321827	+	99.91	29.58
NM_015803.2	50769	Eve2	LXEJ02010592	3222	44279	-	99.94	46.4
NM_015803.2	50769	Eve2	LXEJ02007291	700295	983827	-	99.72	39.43
NM_015803.2	50769	Eve2	LXEJ02007496	2533	45059	-	99.63	14.78
NM_001029912.2	74464	Eve2	LXEJ02000947	26949	65223	+	99.97	87.78
NM_001029912.2	74464	Eve2	LXEJ02005066	337570	338232	+	100	12.28
NM_019635.2	56274	Eve2	LXEJ02001902	29258	112821	+	100	58.74
NM_019635.2	56274	Eve2	LXEJ02000492	6538	122351	-	100	31.52
NM_019635.2	56274	Eve2	LXEJ02002682	226841	227120	+	100	9.56
NM_001079686.1	64009	Eve2	LXEJ02003805	915178	1012377	+	100	52.37
NM_001079686.1	64009	Eve2	LXEJ02001916	102785	169049	-	99.98	47.62
NM_009205.2	20532	Eve2	LXEJ02005212	5346	22936	+	100	57.87
NM_009205.2	20532	Eve2	LXEJ02001036	4110	13060	-	100	42.21
NM_175437.3	212167	Eve2	LXEJ02009094	3108	24909	+	100	55.91
NM_175437.3	212167	Eve2	LXEJ02005153	12287	80049	-	100	42.72
NM_024282.3	78825	Eve2	LXEJ02006067	246329	260868	-	100	87.16
NM_024282.3	78825	Eve2	LXEJ02006812	1635	11551	+	98.81	13.92
NM_026835.2	68774	Eve2	LXEJ02012168	962331	968646	-	100	68.7
NM_026835.2	68774	Eve2	LXEJ02001724	3293	6269	-	99.76	30.76
NM_009506.2	22341	Eve2	LXEJ02005855	17014	46512	+	100	79.16
NM_009506.2	22341	Eve2	LXEJ02006146	99795	100189	+	100	20.99
NM_030174.2	78771	Eve2	LXEJ02001394	17847	124166	+	99.95	53.67
NM_030174.2	78771	Eve2	LXEJ02002835	13106	277586	-	100	39.68
NM_030174.2	78771	Eve2	LXEJ02010462	41842	42132	+	100	6.78
NM_080438.2	110304	Eve2	LXEJ02004376	269623	417995	-	100	68.38
NM_080438.2	110304	Eve2	LXEJ02008758	2346	17265	+	98.56	32.83
NM_177184.3	320528	Eve2	LXEJ02009999	1220957	1356453	+	100	93.42
NM_177184.3	320528	Eve2	LXEJ02010199	148500	161631	-	100	6.6
NM_144515.2	22710	Eve2	LXEJ02005089	10154	17770	+	100	87.57
NM_144515.2	22710	Eve2	LXEJ02006902	10501	10796	-	100	9.35
NM_177393.4	338370	Eve2	LXEJ02011998	523367	656550	-	100	71.98
NM_177393.4	338370	Eve2	LXEJ02003556	12103	12435	-	99.39	4.68
NM_177393.4	338370	Eve2	LXEJ02000942	11583	42460	+	99.3	12.15
NM_177393.4	338370	Eve2	LXEJ02000993	29609	109722	-	97.55	13.12
NM_173754.4	216835	Eve2	LXEJ02005017	2004	48901	-	99.87	54.81
NM_173754.4	216835	Eve2	LXEJ02008162	303837	305858	-	100	45.31
NM_026719.2	68421	Eve2	LXEJ02006656	41209	78963	-	100	84.42
NM_026719.2	68421	Eve2	LXEJ02008727	36235	75812	+	100	15.51
NM_019497.2	14772	Eve2	LXEJ02004961	5435	61385	-	100	54.56
NM_019497.2	14772	Eve2	LXEJ02008906	4919	30213	+	100	37.66
NM_010871.2	17952	Eve2	LXEJ02005743	12078	33952	+	99.91	54.67
NM_010871.2	17952	Eve2	LXEJ02012398	5980	13046	+	100	45.41
NM_010870.2	17951	Eve2	LXEJ02005515	6533	28185	+	100	81.82
NM_010870.2	17951	Eve2	LXEJ02011760	1	1486	-	97.56	10.45
NM_011147.1	237178	Eve2	LXEJ02001120	83824	107529	-	100	72.41
NM_011147.1	237178	Eve2	LXEJ02010706	1296504	1357285	-	99.85	28.31
NM_153534.2	210044	Eve2	LXEJ02001766	9501	277534	+	100	84.25
NM_153534.2	210044	Eve2	LXEJ02006442	63748	103036	-	99.57	16.69
NM_001077713.1	71238	Eve2	LXEJ02007315	66548	70726	-	99.48	70
NM_001077713.1	71238	Eve2	LXEJ02002946	87161	87354	+	97.93	34.72
NM_030254.3	80286	Eve2	LXEJ02005266	203825	211679	-	100	25.11
NM_030254.3	80286	Eve2	LXEJ02005935	53145	178143	+	97.18	78.06
NM_053171.2	94109	Eve2	LXEJ02008547	1591601	1830331	-	100	69.47
NM_053171.2	94109	Eve2	LXEJ02004176	788346	802548	+	99.75	2.91
NM_053171.2	94109	Eve2	LXEJ02003386	1613	136847	-	99.66	10.57
NM_053171.2	94109	Eve2	LXEJ02002667	10965	64726	+	99.35	8.74
NM_053171.2	94109	Eve2	LXEJ02000919	39353	39870	-	98.46	3.62
NM_053171.2	94109	Eve2	LXEJ02004035	10663	134417	-	96.01	2.23
NM_026788.1	665563	Eve2	LXEJ02002399	7347	69009	+	100	75.79
NM_026788.1	665563	Eve2	LXEJ02000854	102708	118359	+	100	18.88
NM_133921.2	100978	Eve2	LXEJ02008946	512309	540004	+	100	80.19
NM_133921.2	100978	Eve2	LXEJ02008946	7712	17064	-	100	19.8
NM_030207.2	78887	Eve2	LXEJ02002517	2713	41207	-	98.68	83.35
NM_030207.2	78887	Eve2	LXEJ02004962	1866	9262	-	100	11.52
NM_181071.3	77097	Eve2	LXEJ02005472	7821	223733	+	99.96	96.39
NM_181071.3	77097	Eve2	LXEJ02005130	799574	916665	+	95.84	4.43
NM_026327.3	67708	Eve2	LXEJ02004987	1380	14692	+	99.96	58.3
NM_026327.3	67708	Eve2	LXEJ02003951	174338	205236	+	99.81	49.9
NM_177047.3	319974	Eve2	LXEJ02003823	33768	73121	-	99.83	79.37
NM_177047.3	319974	Eve2	LXEJ02012522	140341	1183407	+	98.22	23.08
NM_001081012.1	320226	Eve2	LXEJ02002212	15426	111813	+	100	47.62
NM_001081012.1	320226	Eve2	LXEJ02010092	14356	109769	-	99.87	34.29
NM_001081012.1	320226	Eve2	LXEJ02006572	34119	103806	+	99.72	16.13
NM_001081327.1	195646	Eve2	LXEJ02000298	72412	73765	-	100	59.64
NM_001081327.1	195646	Eve2	LXEJ02011265	27500	28419	-	100	40.52
NM_001081341.1	244891	Eve2	LXEJ02005672	223124	531690	-	99.96	61.24
NM_001081341.1	244891	Eve2	LXEJ02012113	755	80789	-	99.94	36.18
NM_001081295.1	622434	Eve2	LXEJ02006108	20682	105316	+	99.9	62.05
NM_001081295.1	622434	Eve2	LXEJ02007698	126924	139730	+	99.65	38.63
NM_001081351.1	214642	Eve2	LXEJ02011808	1235139	1514599	+	99.26	85.85
NM_001081351.1	214642	Eve2	LXEJ02004446	1386	40029	-	99.87	16.29
NM_001081281.1	381485	Eve2	LXEJ02006926	775702	808140	-	100	72.8
NM_001081281.1	381485	Eve2	LXEJ02002252	4793	5780	-	100	27.47
NM_001081277.1	229949	Eve2	LXEJ02005966	5469	69491	+	99.94	59.39
NM_001081277.1	229949	Eve2	LXEJ02010145	48438	132347	-	97.91	41.44
NM_001081264.1	320438	Eve2	LXEJ02008391	204888	230221	-	100	88.31
NM_001081264.1	320438	Eve2	LXEJ02000531	3939	22171	-	97.74	9.92
NM_001081243.1	70598	Eve2	LXEJ02001196	6894	89878	+	100	89.92
NM_001081243.1	70598	Eve2	LXEJ02011420	519231	522208	+	98.68	10.81
NM_001081195.1	238247	Eve2	LXEJ02010530	103831	159717	+	100	37.35
NM_001081195.1	238247	Eve2	LXEJ02004264	3329	5181	+	100	32.05
NM_001081184.1	230393	Eve2	LXEJ02011070	2257	186974	-	99.95	39.21
NM_001081184.1	230393	Eve2	LXEJ02000808	9086	28135	+	100	27.51
NM_001081184.1	230393	Eve2	LXEJ02011305	2589	77599	-	99.33	31.1
NM_001081402.1	545085	Eve2	LXEJ02005474	3165030	3343738	+	100	69.31
NM_001081402.1	545085	Eve2	LXEJ02011401	3625	35615	+	97.59	34.58
NM_001081153.1	208898	Eve2	LXEJ02008443	74163	173286	-	100	39.1
NM_001081153.1	208898	Eve2	LXEJ02001993	100322	103292	-	100	36.76
NM_001081153.1	208898	Eve2	LXEJ02008944	577201	772583	+	99.38	23.92
NM_001081141.1	242425	Eve2	LXEJ02012546	87352	173034	-	100	61.95
NM_001081141.1	242425	Eve2	LXEJ02010635	9206	213479	-	100	38.09
NM_001081137.1	69983	Eve2	LXEJ02010275	2846	69278	-	100	87.82
NM_001081137.1	69983	Eve2	LXEJ02011997	2106653	2109842	-	100	12.21
NM_001081074.1	69865	Eve2	LXEJ02006267	86383	90826	-	99.95	61.07
NM_001081074.1	69865	Eve2	LXEJ02006377	6442	72529	-	99.47	39.26
NM_001081080.1	213109	Eve2	LXEJ02006843	35641	70566	-	100	96.42
NM_001081080.1	213109	Eve2	LXEJ02009102	428307	428576	+	100	3.57
NM_001081121.1	70989	Eve2	LXEJ02007418	130375	133814	-	100	35.85
NM_001081121.1	70989	Eve2	LXEJ02008910	421263	474367	-	98.91	65.44
NM_001081129.1	238680	Eve2	LXEJ02006368	1315353	1461702	-	99.91	95.43
NM_001081129.1	238680	Eve2	LXEJ02007168	369	16573	-	98.47	5.38
NM_001081428.1	75906	Eve2	LXEJ02006612	56216	78245	-	100	46.22
NM_001081428.1	75906	Eve2	LXEJ02009398	3895	80232	-	99.95	53.87
NM_009099.2	20128	Eve2	LXEJ02002608	13622	16914	+	100	73.58
NM_009099.2	20128	Eve2	LXEJ02010660	2182	38252	-	100	25.88
NM_145146.2	280662	Eve2	LXEJ02005164	5915	18681	-	100	53.85
NM_145146.2	280662	Eve2	LXEJ02000836	4412	19161	+	99.89	46.24
NM_018733.2	20265	Eve2	LXEJ02000173	81402	110275	+	100	28.16
NM_018733.2	20265	Eve2	LXEJ02012351	62089	129528	+	99.32	58.65
NM_018733.2	20265	Eve2	LXEJ02008541	1283138	1291474	-	99.43	14.93
NM_001029934.1	237898	Eve2	LXEJ02004850	2591436	2667563	-	99.88	89.44
NM_001029934.1	237898	Eve2	LXEJ02004109	2302403	2372236	+	99.23	11.27
NM_001081642.1	434794	Eve2	LXEJ02010131	12455	18227	+	100	60.62
NM_001081642.1	434794	Eve2	LXEJ02012609	1636	2223	+	100	39.54
NM_001081648.1	434864	Eve2	LXEJ02004588	2928	25514	+	99.68	61.98
NM_001081648.1	434864	Eve2	LXEJ02008860	6404	7049	+	99.69	31.85
NM_001081653.1	620292	Eve2	LXEJ02004123	82470	109647	+	100	23.43
NM_001081653.1	620292	Eve2	LXEJ02009804	650998	1049827	-	98.97	64.21
NM_001081653.1	620292	Eve2	LXEJ02010780	25961	148486	-	97.98	10
NM_153179.3	241035	Eve2	LXEJ02008131	5049	42645	-	100	22.09
NM_153179.3	241035	Eve2	LXEJ02008254	988	23418	-	99.92	10.72
NM_153179.3	241035	Eve2	LXEJ02003948	10530	38411	-	99.67	16.69
NM_153179.3	241035	Eve2	LXEJ02000505	1727	35724	-	99.7	7.79
NM_153179.3	241035	Eve2	LXEJ02009794	23051	111853	-	99.62	14.48
NM_153179.3	241035	Eve2	LXEJ02000458	62161	86140	-	99.26	10.53
NM_153179.3	241035	Eve2	LXEJ02008600	962	38645	+	97.35	2.3
NM_139300.3	107589	Eve2	LXEJ02012166	1382	109027	+	100	80.01
NM_139300.3	107589	Eve2	LXEJ02005063	204940	300289	+	100	20
NM_213615.2	381287	Eve2	LXEJ02010576	8571	21147	-	99.43	70.62
NM_213615.2	381287	Eve2	LXEJ02009170	1175	1701	-	98.86	29.94
NM_001013817.2	434484	Eve2	LXEJ02003886	966	13519	+	99.73	46.83
NM_001013817.2	434484	Eve2	LXEJ02006838	9451	9949	+	98.79	20.64
NM_001013817.2	434484	Eve2	LXEJ02003628	4426	5642	+	98.81	13.81
NM_001013817.2	434484	Eve2	LXEJ02008867	1801	18622	+	94.69	14.97
NM_029249.2	75317	Eve2	LXEJ02006968	35097	37428	-	100	53.03
NM_029249.2	75317	Eve2	LXEJ02010424	61632	98331	+	98.52	48.51
NM_001081746.1	665378	Eve2	LXEJ02002811	2338	10777	-	100	29.36
NM_001081746.1	665378	Eve2	LXEJ02000894	19338	20277	+	98.2	57.98
NM_028260.2	66541	Eve2	LXEJ02005338	5536	38015	-	100	57.69
NM_028260.2	66541	Eve2	LXEJ02008909	4522476	4523853	+	100	42.4
NM_001081756.1	210356	Eve2	LXEJ02006367	137134	752246	+	100	93.83
NM_001081756.1	210356	Eve2	LXEJ02004005	32588	32903	-	100	4.36
NM_176957.3	210356	Eve2	LXEJ02006367	137134	752246	+	100	84.99
NM_176957.3	210356	Eve2	LXEJ02004005	32588	32903	-	100	10.53
NM_001081963.1	240185	Eve2	LXEJ02011874	6808	17163	+	100	93.56
NM_001081963.1	240185	Eve2	LXEJ02004630	5866	20344	-	100	6.46
NM_198105.2	207375	Eve2	LXEJ02000908	950132	1024587	-	100	86.48
NM_198105.2	207375	Eve2	LXEJ02008008	8126	45890	-	100	13.56
NM_001082536.1	223701	Eve2	LXEJ02004958	33254	138813	+	100	94.27
NM_001082536.1	223701	Eve2	LXEJ02002987	29445	60206	+	95.77	7.51
NM_146016.2	237711	Eve2	LXEJ02005177	298058	461468	-	99.97	89.4
NM_146016.2	237711	Eve2	LXEJ02005326	36942	38595	+	100	10.7
NM_172851.2	241175	Eve2	LXEJ02002598	830075	1053645	-	100	30.58
NM_172851.2	241175	Eve2	LXEJ02011332	12636	100900	+	100	25.76
NM_172851.2	241175	Eve2	LXEJ02004289	112	32552	+	99.39	35.29
NM_172851.2	241175	Eve2	LXEJ02002574	39399	58901	-	99.69	6.3
NM_001037909.3	620078	Eve2	LXEJ02003549	3176	17772	-	99.63	71.7
NM_001037909.3	620078	Eve2	LXEJ02004248	7442	7985	+	99.26	28.82
NM_175219.3	620078	Eve2	LXEJ02003549	3176	17772	-	99.65	72.9
NM_175219.3	620078	Eve2	LXEJ02004248	7442	7985	+	99.26	27.6
NM_001037716.2	382243	Eve2	LXEJ02008138	2203	19810	+	100	69.38
NM_001037716.2	382243	Eve2	LXEJ02010869	3842	12030	+	99.04	34.83
NM_008983.2	19272	Eve2	LXEJ02009616	18272	64051	+	100	60.33
NM_008983.2	19272	Eve2	LXEJ02001605	8814	454236	-	99.72	40.52
NM_007766.2	12936	Eve2	LXEJ02008908	410900	442402	-	100	53.77
NM_007766.2	12936	Eve2	LXEJ02011707	16705	28525	-	99.95	46.46
NM_177341.4	226025	Eve2	LXEJ02007289	17754	150955	+	100	73.88
NM_177341.4	226025	Eve2	LXEJ02003732	53160	149184	+	100	21.27
NM_177341.4	226025	Eve2	LXEJ02010005	195083	195359	-	96.38	5.33
NM_175397.4	109032	Eve2	LXEJ02009923	2489	18550	-	98.32	64.04
NM_175397.4	109032	Eve2	LXEJ02012410	13431	22748	-	96.18	49.58
NM_010403.2	15112	Eve2	LXEJ02008652	66167	74474	-	99.76	63.82
NM_010403.2	15112	Eve2	LXEJ02007372	21715	55613	+	98.61	38.98
NM_011959.2	26429	Eve2	LXEJ02004876	54548	104902	+	100	64.64
NM_011959.2	26429	Eve2	LXEJ02011389	24168	24897	-	100	35.45
NM_010099.2	13607	Eve2	LXEJ02006177	1319268	1410034	-	100	88.53
NM_010099.2	13607	Eve2	LXEJ02002582	173319	173899	+	98.96	11.72
NM_010651.3	16640	Eve2	LXEJ02003168	253	10816	-	97.58	69.17
NM_010651.3	16640	Eve2	LXEJ02000583	33290	37162	-	97.67	39.69
NM_018760.2	54403	Eve2	LXEJ02004814	5350	122598	+	100	88.38
NM_018760.2	54403	Eve2	LXEJ02004728	14348	225805	+	98.09	12.56
NM_001001980.2	77569	Eve2	LXEJ02001548	59085	152196	+	100	47.44
NM_001001980.2	77569	Eve2	LXEJ02002887	877532	1190688	-	99.48	53.43
NM_010418.2	15204	Eve2	LXEJ02004435	111704	179763	-	99.98	48.63
NM_010418.2	15204	Eve2	LXEJ02010749	5656	80153	+	99.9	48.25
NM_010418.2	15204	Eve2	LXEJ02003668	16675	38974	+	98.06	3.35
NM_011204.2	19249	Eve2	LXEJ02007086	500771	640622	+	99.85	66.28
NM_011204.2	19249	Eve2	LXEJ02000254	1	42172	+	99.97	46.57
NM_001083806.1	14800	Eve2	LXEJ02001537	2421	58681	+	99.98	90.7
NM_001083806.1	14800	Eve2	LXEJ02003275	54685	55831	-	100	9.29
NM_054041.2	69538	Eve2	LXEJ02004952	6062	61040	+	100	73.13
NM_054041.2	69538	Eve2	LXEJ02004951	1238648	1378456	+	99.37	27.42
NM_010252.4	14405	Eve2	LXEJ02006736	470400	473650	+	99.93	68.14
NM_010252.4	14405	Eve2	LXEJ02008733	12188	32628	+	100	18.38
NM_010252.4	14405	Eve2	LXEJ02001317	15896	42556	+	100	13.64
NM_013877.3	29865	Eve2	LXEJ02005284	169187	176579	+	100	37.19
NM_013877.3	29865	Eve2	LXEJ02001581	4997	6176	-	96.38	66.93
NM_172546.2	215748	Eve2	LXEJ02012352	1	92635	+	99.96	84.25
NM_172546.2	215748	Eve2	LXEJ02004139	1	398	-	100	11.54
NM_177759.3	269693	Eve2	LXEJ02002834	6120431	6251908	-	100	51.12
NM_177759.3	269693	Eve2	LXEJ02005519	2287	13800	+	100	42.79
NM_028576.2	73582	Eve2	LXEJ02004955	157992	224980	+	100	72.06
NM_028576.2	73582	Eve2	LXEJ02005212	49395	55359	+	100	23.48
NM_011831.2	23919	Eve2	LXEJ02008852	1175330	1175540	+	100	29.71
NM_011831.2	23919	Eve2	LXEJ02005623	2046	2540	+	98.19	72.15
NM_177898.4	330721	Eve2	LXEJ02006314	644	24549	+	100	59.69
NM_177898.4	330721	Eve2	LXEJ02001025	8884	26256	-	100	40.43
NM_027964.2	71861	Eve2	LXEJ02006205	24889	38552	-	99.43	85.74
NM_027964.2	71861	Eve2	LXEJ02007865	4263	6758	+	99.69	16.14
NM_172776.2	236293	Eve2	LXEJ02008713	4315	29750	-	100	50.58
NM_172776.2	236293	Eve2	LXEJ02004191	31229	64607	-	98.79	56.02
NM_172447.2	207686	Eve2	LXEJ02010623	5032	20091	+	100	42.71
NM_172447.2	207686	Eve2	LXEJ02005514	7485	29548	+	99.91	34.79
NM_172447.2	207686	Eve2	LXEJ02010903	1853202	1877305	+	100	22.74
NM_025402.2	66179	Eve2	LXEJ02009294	200908	210480	+	99.87	62.51
NM_025402.2	66179	Eve2	LXEJ02007802	1487809	1494400	-	100	37.81
NM_010400.2	15101	Eve2	LXEJ02006591	25380	37593	+	90.85	20.23
NM_010400.2	15101	Eve2	LXEJ02010378	50340	51955	+	77.38	26.28
NM_010400.2	15101	Eve2	LXEJ02012292	26832	28316	-	75.96	33.36
NM_028499.2	73314	Eve2	LXEJ02010350	1353847	1376225	-	99.74	32.56
NM_028499.2	73314	Eve2	LXEJ02011700	27067	31880	-	98.96	23.71
NM_028499.2	73314	Eve2	LXEJ02006893	35980	36257	-	98.92	22.97
NM_172706.3	231014	Eve2	LXEJ02007985	640745	710880	+	99.97	87.52
NM_172706.3	231014	Eve2	LXEJ02004996	44498	63596	+	100	6.89
NM_172706.3	231014	Eve2	LXEJ02006761	75486	104784	+	95.7	6.95
NM_133353.3	170834	Eve2	LXEJ02007131	35511	36467	-	100	55.32
NM_133353.3	170834	Eve2	LXEJ02012168	1064780	1068496	-	100	44.67
NM_053153.2	93970	Eve2	LXEJ02006498	13930	21667	+	96.04	56.9
NM_053153.2	93970	Eve2	LXEJ02009190	3090	12430	+	96.38	43.98
NM_178395.3	70546	Eve2	LXEJ02010693	60995	111988	+	100	54.6
NM_178395.3	70546	Eve2	LXEJ02005911	247175	248319	-	99.82	45.83
NM_177002.3	319800	Eve2	LXEJ02008831	5203	23881	+	99.8	51.82
NM_177002.3	319800	Eve2	LXEJ02000800	32114	34478	-	99.8	25.93
NM_001033227.2	109342	Eve2	LXEJ02004844	979278	985154	-	100	45.77
NM_001033227.2	109342	Eve2	LXEJ02007240	19989	36561	-	99.28	55.41
NM_029238.2	75288	Eve2	LXEJ02006173	1304603	1328566	-	100	82.61
NM_029238.2	75288	Eve2	LXEJ02001216	105323	105656	+	99.4	17.75
NM_178681.4	217480	Eve2	LXEJ02001187	59275	104196	+	99.8	54.83
NM_178681.4	217480	Eve2	LXEJ02005957	8869	140871	-	97.38	28.58
NM_178681.4	217480	Eve2	LXEJ02002836	101664	664800	+	97.47	21.23
NM_028757.2	74103	Eve2	LXEJ02010194	114581	142196	+	100	81.07
NM_028757.2	74103	Eve2	LXEJ02002749	3974746	4175871	-	100	18.99
NM_183294.2	71091	Eve2	LXEJ02006453	93294	115964	-	100	79.81
NM_183294.2	71091	Eve2	LXEJ02000001	691057	712354	+	100	27.53
NM_144953.2	67080	Eve2	LXEJ02003532	32892	41666	-	99.83	74.22
NM_144953.2	67080	Eve2	LXEJ02007055	7405	12712	-	98.06	31.05
NM_011674.4	22239	Eve2	LXEJ02000540	1046406	1056692	+	100	74.38
NM_011674.4	22239	Eve2	LXEJ02011039	11730	35642	-	100	25.64
NM_172885.2	243274	Eve2	LXEJ02010654	84060	96887	+	100	49.67
NM_172885.2	243274	Eve2	LXEJ02011599	253175	551738	+	99.67	43.26
NM_201361.2	381110	Eve2	LXEJ02010230	4019	26290	+	100	40.45
NM_201361.2	381110	Eve2	LXEJ02012061	207106	213981	+	100	30.96
NM_201361.2	381110	Eve2	LXEJ02006724	1176798	1177321	-	99.8	29.07
NM_025736.2	66736	Eve2	LXEJ02002607	549736	586147	+	100	69.39
NM_025736.2	66736	Eve2	LXEJ02010854	6919	7304	+	99.74	31
NM_031378.3	83492	Eve2	LXEJ02003327	8121	12251	+	99.86	61.04
NM_031378.3	83492	Eve2	LXEJ02000359	21575	30954	+	100	39.16
NM_009014.3	19363	Eve2	LXEJ02005034	165955	203852	+	98.97	47.2
NM_009014.3	19363	Eve2	LXEJ02004979	610505	775773	-	98.27	58.88
NM_001033324.2	235320	Eve2	LXEJ02002771	50468	61501	+	99.88	66.87
NM_001033324.2	235320	Eve2	LXEJ02007792	7492	16190	-	98.44	31.38
NM_053150.2	93967	Eve2	LXEJ02009190	3090	12430	+	93.84	47.51
NM_053150.2	93967	Eve2	LXEJ02011278	2300	9885	-	92.8	61.72
NM_175448.3	215890	Eve2	LXEJ02004669	35130	66290	+	100	53.88
NM_175448.3	215890	Eve2	LXEJ02006342	7853	12715	-	98.92	41.08
NM_026484.3	67974	Eve2	LXEJ02010823	34706	107468	+	99.97	84.31
NM_026484.3	67974	Eve2	LXEJ02004550	59677	60309	+	100	15.75
NM_198659.2	381476	Eve2	LXEJ02004923	48217	85502	-	100	26.54
NM_198659.2	381476	Eve2	LXEJ02004569	117174	139826	+	99.69	46.91
NM_198659.2	381476	Eve2	LXEJ02010316	33138	72313	-	98.54	19.33
NM_198659.2	381476	Eve2	LXEJ02000657	305	103593	+	96.68	10.53
NM_026998.3	72183	Eve2	LXEJ02010848	10413	34895	-	100	85.15
NM_026998.3	72183	Eve2	LXEJ02005013	842429	861094	+	97.74	16.28
NM_183094.3	72891	Eve2	LXEJ02010131	12425	18227	+	99.2	60.3
NM_183094.3	72891	Eve2	LXEJ02012609	1632	2225	+	97.69	39
NM_080462.2	140483	Eve2	LXEJ02005376	11648	27972	+	100	84.26
NM_080462.2	140483	Eve2	LXEJ02007072	68734	72487	+	97.81	16.51
NM_145743.2	215951	Eve2	LXEJ02004959	883988	931648	-	100	61.36
NM_145743.2	215951	Eve2	LXEJ02003996	1098342	1176444	+	100	38.41
NM_177769.4	270162	Eve2	LXEJ02007737	178056	213542	-	99.95	89.36
NM_177769.4	270162	Eve2	LXEJ02010196	152750	160687	+	93.31	14.81
NM_001083918.1	666532	Eve2	LXEJ02005545	5558	20744	+	99.83	90.38
NM_001083918.1	666532	Eve2	LXEJ02002077	30278	63390	+	99.05	11.3
NM_009109.2	20190	Eve2	LXEJ02004211	5421050	5492634	+	100	70.29
NM_009109.2	20190	Eve2	LXEJ02011795	998	51332	+	99.93	29.98
NM_207270.2	545902	Eve2	LXEJ02001199	592863	617744	+	100	72.71
NM_207270.2	545902	Eve2	LXEJ02007982	157710	165345	+	99.54	27.43
NM_177033.3	319922	Eve2	LXEJ02011081	9185	118555	+	99.82	64.19
NM_177033.3	319922	Eve2	LXEJ02007342	14624	17216	-	100	36.1
NM_009763.3	12182	Eve2	LXEJ02005055	8951	14957	+	100	69.26
NM_009763.3	12182	Eve2	LXEJ02005095	9565	17031	-	99.86	30.86
NM_007938.2	13840	Eve2	LXEJ02008281	48114	48781	-	100	15.85
NM_007938.2	13840	Eve2	LXEJ02008844	1314962	2092946	-	99.05	60.4
NM_007938.2	13840	Eve2	LXEJ02004779	1280	100247	+	98.59	16.87
NM_010492.3	15893	Eve2	LXEJ02006042	21509	63406	-	100	48.77
NM_010492.3	15893	Eve2	LXEJ02001763	1012601	1060909	-	99.09	52.48
NM_001025607.3	382275	Eve2	LXEJ02002990	16353	18025	+	100	21
NM_001025607.3	382275	Eve2	LXEJ02007516	5609	9854	+	99.31	34.5
NM_001025607.3	382275	Eve2	LXEJ02010137	21025	21197	-	98.26	20.87
NM_001081299.1	320865	Eve2	LXEJ02003990	7731	86960	-	100	36.07
NM_001081299.1	320865	Eve2	LXEJ02001192	183489	373979	+	100	32.68
NM_001081299.1	320865	Eve2	LXEJ02005116	7961	8451	+	100	17.89
NM_010806.1	17356	Eve2	LXEJ02011725	45653	105177	-	100	74.27
NM_010806.1	17356	Eve2	LXEJ02004822	110084	181974	+	100	24.09
NM_001085348.1	100040016	Eve2	LXEJ02008170	698	2942	-	99.63	71.11
NM_001085348.1	100040016	Eve2	LXEJ02010050	16181	18700	-	100	34.91
NM_001085356.1	434764	Eve2	LXEJ02010050	16181	18700	-	99.63	34.91
NM_001085356.1	434764	Eve2	LXEJ02008170	698	2942	-	97.11	71.11
NM_021408.3	22283	Eve2	LXEJ02006028	1332387	1982379	-	100	93.88
NM_021408.3	22283	Eve2	LXEJ02007988	58418	62720	-	100	5.29
NM_001085373.1	328949	Eve2	LXEJ02012198	52941	121414	-	99.97	87.24
NM_001085373.1	328949	Eve2	LXEJ02004794	4880	316531	-	99.03	13.14
NM_001085374.1	328949	Eve2	LXEJ02012198	52941	121414	-	99.97	87.6
NM_001085374.1	328949	Eve2	LXEJ02004794	4880	158119	-	99	12.78
NM_008584.3	17286	Eve2	LXEJ02010293	6503	18714	+	100	66.09
NM_008584.3	17286	Eve2	LXEJ02002313	151578	152376	+	100	34.02
NM_134080.1	286940	Eve2	LXEJ02005136	4845	83078	+	100	90.82
NM_134080.1	286940	Eve2	LXEJ02004445	84831	136756	+	99.52	9.29
NM_016667.3	20649	Eve2	LXEJ02007096	68014	225824	-	100	62.84
NM_016667.3	20649	Eve2	LXEJ02004729	22564	31467	+	99.84	30.93
NM_011891.4	24052	Eve2	LXEJ02007923	18621	20772	-	100	55.61
NM_011891.4	24052	Eve2	LXEJ02008926	25616	75739	+	100	20.22
NM_011891.4	24052	Eve2	LXEJ02005299	1846083	2030335	-	99.71	24.58
NM_011800.4	23836	Eve2	LXEJ02000977	5010	29671	+	100	60.02
NM_011800.4	23836	Eve2	LXEJ02007232	4797	28889	-	99.58	39.01
NM_024204.6	52024	Eve2	LXEJ02010680	14146	41004	+	99.93	83.92
NM_024204.6	52024	Eve2	LXEJ02010498	2024339	2024625	+	100	16.36
NM_027617.3	70951	Eve2	LXEJ02008007	94389	113487	-	99.89	50.93
NM_027617.3	70951	Eve2	LXEJ02007627	2231187	2249817	+	99.89	49.53
NM_134046.5	52504	Eve2	LXEJ02005386	99815	105465	-	100	80.72
NM_134046.5	52504	Eve2	LXEJ02006025	4280	14512	-	98.55	20.58
NM_029790.3	76894	Eve2	LXEJ02001979	143204	144203	-	100	52.88
NM_029790.3	76894	Eve2	LXEJ02000535	351744	498562	+	98.59	48.65
NM_133733.4	71566	Eve2	LXEJ02007418	6611	19551	+	100	81.08
NM_133733.4	71566	Eve2	LXEJ02008910	191634	266584	+	99.64	19.18
NM_030711.4	80898	Eve2	LXEJ02011965	7419	43459	-	99.96	67.76
NM_030711.4	80898	Eve2	LXEJ02011754	16244	17546	-	99.92	32.46
NM_177225.4	320679	Eve2	LXEJ02003999	108110	372967	+	99.85	74.08
NM_177225.4	320679	Eve2	LXEJ02006694	61403	115386	+	96.92	31.04
NM_173376.3	209003	Eve2	LXEJ02000403	43865	48269	-	100	83.64
NM_173376.3	209003	Eve2	LXEJ02008539	603596	606047	-	99.65	16.52
NM_172827.3	240028	Eve2	LXEJ02008951	253042	278649	-	99.93	64.21
NM_172827.3	240028	Eve2	LXEJ02000811	61057	122789	+	99.94	36.01
NM_177346.4	229357	Eve2	LXEJ02003251	15289	25621	-	99.86	65.64
NM_177346.4	229357	Eve2	LXEJ02004634	8436	9588	-	99.82	34.56
NM_172815.3	239405	Eve2	LXEJ02002607	86531	159142	-	100	71.01
NM_172815.3	239405	Eve2	LXEJ02001982	19718	20805	-	100	29.04
NM_183113.3	75721	Eve2	LXEJ02009814	25278	64891	-	100	66.89
NM_183113.3	75721	Eve2	LXEJ02009185	5715	41849	-	100	27.42
NM_001033281.3	225518	Eve2	LXEJ02005020	3574	11278	+	100	41.63
NM_001033281.3	225518	Eve2	LXEJ02001061	30732	46516	+	99.34	23.26
NM_001033281.3	225518	Eve2	LXEJ02012357	938362	947557	+	99.04	36.17
NM_175441.5	213435	Eve2	LXEJ02012001	1205830	1220796	+	99.89	65.04
NM_175441.5	213435	Eve2	LXEJ02010366	883	18905	+	99.9	35.27
NM_175467.3	228677	Eve2	LXEJ02002895	987976	1088086	+	100	88.36
NM_175467.3	228677	Eve2	LXEJ02008013	18026	18428	+	100	11.74
NM_176073.4	54381	Eve2	LXEJ02005937	37400	74721	+	100	34.32
NM_176073.4	54381	Eve2	LXEJ02006750	27805	28264	+	100	23.92
NM_176073.4	54381	Eve2	LXEJ02008954	1308685	1723297	-	95.79	40.3
NM_001081133.2	16558	Eve2	LXEJ02006539	2278250	2419041	+	100	74.38
NM_001081133.2	16558	Eve2	LXEJ02011966	43937	116167	+	99.44	26.2
NM_001085499.1	209005	Eve2	LXEJ02011660	26605	50898	+	100	74.64
NM_001085499.1	209005	Eve2	LXEJ02005784	82614	87457	-	99.81	25.49
NM_018755.2	54381	Eve2	LXEJ02005937	20002	74721	+	97.2	36.95
NM_018755.2	54381	Eve2	LXEJ02006750	2232	28264	+	95.29	30.35
NM_018755.2	54381	Eve2	LXEJ02008954	1308685	1723297	-	95.94	41.23
NM_175628.3	232345	Eve2	LXEJ02006650	11345	36120	-	100	60.75
NM_175628.3	232345	Eve2	LXEJ02006933	2540943	2554712	-	99.67	39.4
NM_153413.2	208869	Eve2	LXEJ02005315	18808	197234	+	100	42.89
NM_153413.2	208869	Eve2	LXEJ02009877	616842	638700	-	99.8	50.46
NM_153413.2	208869	Eve2	LXEJ02005665	13329	13778	-	98.66	4.96
NM_175484.3	235431	Eve2	LXEJ02004910	2888321	2901333	+	99.96	80.33
NM_175484.3	235431	Eve2	LXEJ02003588	14760	97414	-	99.86	19.71
NM_007767.3	12937	Eve2	LXEJ02011707	11077	13458	-	100	45.44
NM_007767.3	12937	Eve2	LXEJ02008908	410900	447546	-	99.75	55.07
NM_029949.3	77634	Eve2	LXEJ02005209	4991	23719	-	100	51.66
NM_029949.3	77634	Eve2	LXEJ02010887	74289	91283	-	99.26	58.91
NM_001033385.3	544696	Eve2	LXEJ02011196	9453	23247	+	100	49.73
NM_001033385.3	544696	Eve2	LXEJ02008503	21272	99156	+	100	33.22
NM_001033385.3	544696	Eve2	LXEJ02009513	2767	92557	-	100	16.86
NM_028887.3	74355	Eve2	LXEJ02007442	1804	90088	-	100	56.47
NM_028887.3	74355	Eve2	LXEJ02011543	2027917	2064884	-	100	43.51
NM_178756.4	272031	Eve2	LXEJ02007734	23484	26096	-	99.19	69.37
NM_178756.4	272031	Eve2	LXEJ02005349	8687	49980	-	99.6	20.2
NM_001099318.1	100039948	Eve2	LXEJ02008170	698	2942	-	99.45	71.11
NM_001099318.1	100039948	Eve2	LXEJ02010050	16181	18700	-	99.26	34.91
NM_001099316.1	100039913	Eve2	LXEJ02008170	698	2920	-	99.43	69.9
NM_001099316.1	100039913	Eve2	LXEJ02010050	16177	18700	-	100	36.26
NM_007754.2	12874	Eve2	LXEJ02004834	11399	49619	+	99.98	88.75
NM_007754.2	12874	Eve2	LXEJ02008651	14197	14983	+	100	8.59
NM_001083945.1	100037282	Eve2	LXEJ02008945	8800	18173	+	99.91	71
NM_001083945.1	100037282	Eve2	LXEJ02011517	634	7321	-	100	28.93
NM_054053.4	110789	Eve2	LXEJ02003471	4172	116521	+	100	59.41
NM_054053.4	110789	Eve2	LXEJ02000202	1054984	1430892	-	100	35.89
NM_054053.4	110789	Eve2	LXEJ02008297	84289	124875	+	100	2.92
NM_011076.2	18671	Eve2	LXEJ02007580	4327	39927	+	100	62.86
NM_011076.2	18671	Eve2	LXEJ02003128	1234	44098	+	100	37.19
NM_173444.2	269198	Eve2	LXEJ02005825	132	141684	-	99.98	66.27
NM_173444.2	269198	Eve2	LXEJ02007280	888399	895047	-	100	33.87
NM_010002.3	13097	Eve2	LXEJ02008896	18845	21658	-	100	17.53
NM_010002.3	13097	Eve2	LXEJ02008720	6574	14099	-	96.41	13.48
NM_026430.3	67883	Eve2	LXEJ02011267	517374	542020	-	100	55.58
NM_026430.3	67883	Eve2	LXEJ02001207	20769	68405	+	100	44.57
NM_053011.2	94217	Eve2	LXEJ02010272	2923	129553	+	99.93	21.86
NM_053011.2	94217	Eve2	LXEJ02004373	17650	762167	-	99.61	34.83
NM_053011.2	94217	Eve2	LXEJ02010006	22741	625358	+	99.16	37.88
NM_053011.2	94217	Eve2	LXEJ02004101	1567207	1934988	+	97.42	7.58
NM_008166.2	14803	Eve2	LXEJ02000827	847791	1054604	+	100	23.77
NM_008166.2	14803	Eve2	LXEJ02001461	8411	16599	+	100	22.26
NM_008166.2	14803	Eve2	LXEJ02006674	73726	87930	-	100	13.2
NM_008166.2	14803	Eve2	LXEJ02004418	26137	49174	+	98.84	35.41
NM_001099635.1	17883	Eve2	LXEJ02009164	19961	29114	-	100	50.48
NM_001099635.1	17883	Eve2	LXEJ02007862	363727	378000	+	100	49.58
NM_008032.3	14266	Eve2	LXEJ02007411	54526	83207	+	99.7	22.8
NM_008032.3	14266	Eve2	LXEJ02012468	6345	521406	-	99.1	82.5
NM_009145.2	20320	Eve2	LXEJ02004845	2602102	2646714	+	99.19	89.55
NM_009145.2	20320	Eve2	LXEJ02010213	23054	23340	+	100	13.81
NM_008858.3	18760	Eve2	LXEJ02006492	12007	65811	+	100	74.48
NM_008858.3	18760	Eve2	LXEJ02003279	18416	242371	-	100	24.88
NM_026825.3	68732	Eve2	LXEJ02007285	747052	992364	+	100	72.6
NM_026825.3	68732	Eve2	LXEJ02008583	3517	16968	+	100	27.39
NM_001102414.1	117591	Eve2	LXEJ02008743	3624470	3728287	+	99.96	89.89
NM_001102414.1	117591	Eve2	LXEJ02007133	5957	8865	+	100	10.18
NM_001102415.1	117591	Eve2	LXEJ02008743	3624470	3728287	+	99.96	88.9
NM_001102415.1	117591	Eve2	LXEJ02007133	5957	8865	+	100	11.18
NM_172595.4	218639	Eve2	LXEJ02005052	106144	108901	+	100	82.05
NM_172595.4	218639	Eve2	LXEJ02006181	3545021	3741918	+	99.08	19.37
NM_001098528.2	98741	Eve2	LXEJ02003186	21414	26145	-	100	89.13
NM_001098528.2	98741	Eve2	LXEJ02002597	49801	64526	+	98.24	11.75
NM_001085376.2	23850	Eve2	LXEJ02005667	385680	545483	-	100	76.79
NM_001085376.2	23850	Eve2	LXEJ02001808	67739	115748	+	99.27	24.04
NM_133649.2	107723	Eve2	LXEJ02000264	50995	97903	-	100	88.24
NM_133649.2	107723	Eve2	LXEJ02004649	18849	49532	-	97	13.51
NM_026458.4	67928	Eve2	LXEJ02004105	2529	93144	-	99.92	76.72
NM_026458.4	67928	Eve2	LXEJ02012485	13016	26209	+	100	23.43
NM_001103181.1	68842	Eve2	LXEJ02009987	44511	55634	-	99.47	79.5
NM_001103181.1	68842	Eve2	LXEJ02011848	5629	15904	-	99.81	5.95
NM_054040.3	68842	Eve2	LXEJ02009987	44511	55634	-	99.47	72.59
NM_054040.3	68842	Eve2	LXEJ02011848	5629	15904	-	99.81	5.43
NM_001103199.1	230622	Eve2	LXEJ02012106	6654	116454	+	99.85	18.27
NM_001103199.1	230622	Eve2	LXEJ02002628	25698	27854	-	99.22	16.76
NM_001103199.1	230622	Eve2	LXEJ02002746	8202	38771	+	99.08	8.57
NM_001103199.1	230622	Eve2	LXEJ02002596	1629777	2587998	-	97.46	55.57
NM_001104540.1	665210	Eve2	LXEJ02011935	17667	22434	+	99.79	55.81
NM_001104540.1	665210	Eve2	LXEJ02010994	8844	9768	+	100	35.97
NM_001104549.1	627367	Eve2	LXEJ02003119	7527	23638	-	99.93	59.39
NM_001104549.1	627367	Eve2	LXEJ02008951	1704349	1712272	+	99.9	40.75
NM_001104578.1	434701	Eve2	LXEJ02003064	24579	29586	+	100	59.39
NM_001104578.1	434701	Eve2	LXEJ02000152	4376	7477	+	98.37	40.68
NM_001104582.1	383258	Eve2	LXEJ02006729	917694	934378	+	100	64.67
NM_001104582.1	383258	Eve2	LXEJ02010860	12254	13164	-	99.89	35.55
NM_001104615.1	637053	Eve2	LXEJ02002432	5608	17303	-	99.92	55.55
NM_001104615.1	637053	Eve2	LXEJ02004219	33159	34143	-	100	39.65
NM_001104619.1	667069	Eve2	LXEJ02003749	1	21886	-	99.67	87.27
NM_001104619.1	667069	Eve2	LXEJ02006904	27076	27409	-	98.21	13.36
NM_175674.3	319217	Eve2	LXEJ02003177	11949	14396	-	100	44.56
NM_175674.3	319217	Eve2	LXEJ02012481	1271	1548	-	100	11.19
NM_001104628.1	384221	Eve2	LXEJ02000858	4698	19073	-	100	64.39
NM_001104628.1	384221	Eve2	LXEJ02009805	3470766	3471676	+	100	35.72
NM_001104634.1	667180	Eve2	LXEJ02002070	4239	15540	+	100	48.55
NM_001104634.1	667180	Eve2	LXEJ02012116	69580	71207	+	100	20.02
NM_001104637.1	546913	Eve2	LXEJ02008363	5997	6894	+	99.88	35.05
NM_001104637.1	546913	Eve2	LXEJ02012116	69580	71207	+	97.85	20.02
NM_001104642.1	232367	Eve2	LXEJ02009604	20259	28366	+	100	51.28
NM_001104642.1	232367	Eve2	LXEJ02003188	44637	53765	-	100	48.79
NM_001104644.1	637908	Eve2	LXEJ02011197	3987	12132	-	100	54.6
NM_001104644.1	637908	Eve2	LXEJ02007264	4191	7547	+	100	45.47
NM_001081449.2	666085	Eve2	LXEJ02009678	4552	18647	-	100	59.64
NM_001081449.2	666085	Eve2	LXEJ02011197	20820	27739	-	99.9	45.43
NM_001104648.1	629079	Eve2	LXEJ02009503	7789	29817	+	100	87.94
NM_001104648.1	629079	Eve2	LXEJ02006649	22382	22675	+	99.31	12.56
NM_001104927.1	665095	Eve2	LXEJ02002120	337829	374743	+	99.66	79.6
NM_001104927.1	665095	Eve2	LXEJ02001887	139659	157516	-	94.71	28.55
NM_001105055.1	628422	Eve2	LXEJ02012138	5152	17337	-	99.82	64.38
NM_001105055.1	628422	Eve2	LXEJ02003342	11892	12853	-	98.25	37.15
NM_009490.3	22306	Eve2	LXEJ02012371	13313	26646	-	99.85	80.89
NM_009490.3	22306	Eve2	LXEJ02003717	5559	8899	-	99.18	19.1
NM_001105067.1	625353	Eve2	LXEJ02000130	4067	11312	+	98.95	59.12
NM_001105067.1	625353	Eve2	LXEJ02005444	3578	10526	+	99.08	42.18
NM_001105068.1	100042653	Eve2	LXEJ02003661	977	18830	-	99.93	56.89
NM_001105068.1	100042653	Eve2	LXEJ02005764	16593	21506	-	98.73	40.28
NM_001105075.1	100042810	Eve2	LXEJ02011792	23761	31466	+	99.21	59.86
NM_001105075.1	100042810	Eve2	LXEJ02005764	16593	21506	-	97.18	40.28
NM_001105151.1	100042891	Eve2	LXEJ02006429	2870	22593	-	99.93	64.63
NM_001105151.1	100042891	Eve2	LXEJ02005764	16593	21506	-	100	40.28
NM_001101588.1	631304	Eve2	LXEJ02008424	92547	95100	-	99.84	41.88
NM_001101588.1	631304	Eve2	LXEJ02005509	104257	116100	+	97.34	60.89
NM_028135.2	72160	Eve2	LXEJ02005195	4778	67236	+	100	71.75
NM_028135.2	72160	Eve2	LXEJ02012359	69438	78806	-	100	28.24
NM_173004.3	269784	Eve2	LXEJ02010152	33744	270020	+	100	70.61
NM_173004.3	269784	Eve2	LXEJ02009647	54096	730053	+	100	29.17
NM_001109749.1	269784	Eve2	LXEJ02010152	33744	295055	+	100	83.75
NM_001109749.1	269784	Eve2	LXEJ02009647	54096	730053	+	100	16.24
NM_001109751.1	269784	Eve2	LXEJ02010152	33744	270020	+	100	68.54
NM_001109751.1	269784	Eve2	LXEJ02009647	495080	730053	+	100	31.23
NM_009808.4	12364	Eve2	LXEJ02010634	2267458	2281762	+	100	53.85
NM_009808.4	12364	Eve2	LXEJ02006586	858	14227	-	99.92	50.86
NM_001081011.2	14270	Eve2	LXEJ02008841	114716	379809	+	99.34	81.62
NM_001081011.2	14270	Eve2	LXEJ02009184	10023	63616	+	99.82	20.95
NM_009819.2	12386	Eve2	LXEJ02009106	27212	751062	-	99.93	72.69
NM_009819.2	12386	Eve2	LXEJ02007850	32410	62975	+	99.65	14.21
NM_009819.2	12386	Eve2	LXEJ02002314	37177	279762	-	97.11	16.11
NM_145732.2	12386	Eve2	LXEJ02009106	27212	751062	-	99.92	69.84
NM_145732.2	12386	Eve2	LXEJ02007850	46485	62975	+	99.82	13.93
NM_145732.2	12386	Eve2	LXEJ02002314	37177	279762	-	97.5	18.83
NM_001109764.1	12386	Eve2	LXEJ02009106	27212	751062	-	99.93	70.89
NM_001109764.1	12386	Eve2	LXEJ02007850	46485	62975	+	99.82	13.45
NM_001109764.1	12386	Eve2	LXEJ02002314	37177	279762	-	97.5	18.17
NM_001101488.1	269994	Eve2	LXEJ02006208	129550	161467	-	100	77.95
NM_001101488.1	269994	Eve2	LXEJ02004832	536	173026	-	99.9	26.35
NM_177278.5	320858	Eve2	LXEJ02004851	51838	84487	+	99.42	56.38
NM_177278.5	320858	Eve2	LXEJ02007394	29213	122943	+	99.45	20.17
NM_177278.5	320858	Eve2	LXEJ02010164	13250	129292	-	96.66	12.34
NM_177278.5	320858	Eve2	LXEJ02009095	36927	79829	-	96.84	12.95
NM_001100609.1	100039467	Eve2	LXEJ02012108	13610	29166	-	99.84	71.55
NM_001100609.1	100039467	Eve2	LXEJ02004975	941717	943419	-	100	28.66
NM_001109970.1	100039550	Eve2	LXEJ02012108	13593	29166	-	100	72.07
NM_001109970.1	100039550	Eve2	LXEJ02004975	941717	943419	-	100	28.13
NM_030692.4	83493	Eve2	LXEJ02000930	713	16333	+	99.96	73.02
NM_030692.4	83493	Eve2	LXEJ02005101	819874	860557	+	100	27.11
NM_001100466.1	639774	Eve2	LXEJ02011248	2256	15777	+	100	63.98
NM_001100466.1	639774	Eve2	LXEJ02009566	2832	12074	-	98.55	37.65
NM_011766.5	22762	Eve2	LXEJ02011996	68755	218654	+	100	81.46
NM_011766.5	22762	Eve2	LXEJ02006374	15241	230841	-	99.89	18.51
NM_177350.5	235379	Eve2	LXEJ02003036	18216	47101	+	100	91.37
NM_177350.5	235379	Eve2	LXEJ02010074	156762	157162	+	100	8.62
NM_033652.5	110648	Eve2	LXEJ02005150	3065	7167	+	100	69.05
NM_033652.5	110648	Eve2	LXEJ02005159	485834	598045	+	99.6	22.79
NM_027341.2	224170	Eve2	LXEJ02010265	45627	82634	-	99.9	78.98
NM_027341.2	224170	Eve2	LXEJ02000655	4204	26095	-	100	21.19
NM_001110017.1	224170	Eve2	LXEJ02010265	45627	82634	-	99.91	81.23
NM_001110017.1	224170	Eve2	LXEJ02000655	7405	26095	-	100	16.91
NM_177595.4	210719	Eve2	LXEJ02003257	64637	66884	-	99.71	66.69
NM_177595.4	210719	Eve2	LXEJ02007903	1823	14593	-	98.56	34.58
NM_030595.1	26422	Eve2	LXEJ02009806	795680	1043971	-	99.93	42.95
NM_030595.1	26422	Eve2	LXEJ02010641	10198	138052	-	99.97	31.86
NM_030595.1	26422	Eve2	LXEJ02007524	5334	16596	-	100	8.6
NM_030595.1	26422	Eve2	LXEJ02006996	16408	45369	+	99.46	10.11
NM_030595.1	26422	Eve2	LXEJ02008650	29269	64220	+	96.95	7.67
NM_177322.3	11607	Eve2	LXEJ02001495	2884654	2886622	-	99.94	86.2
NM_177322.3	11607	Eve2	LXEJ02003207	145969	154639	+	99.07	14.18
NM_018869.3	14773	Eve2	LXEJ02005189	48874	174172	+	99.61	73.54
NM_018869.3	14773	Eve2	LXEJ02009449	39205	44051	-	99.66	28.53
NM_207651.3	27411	Eve2	LXEJ02004977	89580	269842	+	100	90.63
NM_207651.3	27411	Eve2	LXEJ02000385	155367	167709	-	100	9.39
NM_030683.3	27411	Eve2	LXEJ02004977	89580	232744	+	100	81.54
NM_030683.3	27411	Eve2	LXEJ02000385	127450	167709	-	95.43	24.24
NM_014194.5	16638	Eve2	LXEJ02011278	2300	9902	-	100	68.65
NM_014194.5	16638	Eve2	LXEJ02002993	15732	16162	-	100	31.34
NM_181815.3	75216	Eve2	LXEJ02011240	63505	158507	+	100	34.66
NM_181815.3	75216	Eve2	LXEJ02006538	32227	117461	-	100	32.01
NM_181815.3	75216	Eve2	LXEJ02006629	10503	22030	+	99.49	24.53
NM_181815.3	75216	Eve2	LXEJ02011588	5471	52281	+	94.56	11.5
NM_001101433.1	71918	Eve2	LXEJ02005476	2259110	2267263	-	100	89.85
NM_001101433.1	71918	Eve2	LXEJ02002310	20062	32210	-	98.53	10.88
NM_013838.2	22068	Eve2	LXEJ02002087	206	82829	-	99.92	43.38
NM_013838.2	22068	Eve2	LXEJ02011204	6196	33416	-	99.42	42.52
NM_013838.2	22068	Eve2	LXEJ02010023	99502	100775	-	100	12.39
NM_027260.3	69922	Eve2	LXEJ02011728	5593	84267	+	99.92	75.31
NM_027260.3	69922	Eve2	LXEJ02012657	79015	81350	+	99.78	24.86
NM_001101519.1	403185	Eve2	LXEJ02012278	18629	26866	+	100	78.74
NM_001101519.1	403185	Eve2	LXEJ02003806	1792235	1792404	+	100	21.76
NM_032465.2	84544	Eve2	LXEJ02000209	922467	958638	-	100	56.35
NM_032465.2	84544	Eve2	LXEJ02005573	11587	37095	-	100	43.3
NM_008312.4	15560	Eve2	LXEJ02010166	12641	58343	-	99.57	79.76
NM_008312.4	15560	Eve2	LXEJ02001603	52617	196650	+	97.72	24.74
NM_016780.2	16416	Eve2	LXEJ02002476	3748	15507	+	99.9	69.43
NM_016780.2	16416	Eve2	LXEJ02000010	365	40975	-	99.56	31.4
NM_011995.4	26875	Eve2	LXEJ02004818	185530	397726	+	99.85	83.62
NM_011995.4	26875	Eve2	LXEJ02010918	1160	32969	-	99.45	17.33
NM_008746.5	18213	Eve2	LXEJ02001383	62125	226775	+	100	51.3
NM_008746.5	18213	Eve2	LXEJ02002498	3040	156641	-	98.19	53.59
NM_182809.2	18213	Eve2	LXEJ02001383	62125	117652	+	100	62.17
NM_182809.2	18213	Eve2	LXEJ02002498	29696	156641	-	100	37.76
NM_027618.1	70952	Eve2	LXEJ02006595	122392	138527	+	99.73	66.76
NM_027618.1	70952	Eve2	LXEJ02012039	8782	16948	+	100	15.18
NM_027618.1	70952	Eve2	LXEJ02000077	14839	15155	-	100	18.58
NM_016704.2	12274	Eve2	LXEJ02004325	48578	70787	-	100	54.52
NM_016704.2	12274	Eve2	LXEJ02010972	5469	41842	-	99.92	45.4
NM_009784.2	12293	Eve2	LXEJ02004818	1637231	2121534	+	99.82	93.12
NM_009784.2	12293	Eve2	LXEJ02010051	15761	88478	-	99.62	7.1
NM_001110843.1	12293	Eve2	LXEJ02004818	1637231	2121534	+	99.82	93.17
NM_001110843.1	12293	Eve2	LXEJ02010051	15761	88478	-	99.62	7.05
NM_001110844.1	12293	Eve2	LXEJ02004818	1637231	2121534	+	99.82	93.14
NM_001110844.1	12293	Eve2	LXEJ02010051	15761	88478	-	99.62	7.08
NM_001110845.1	12293	Eve2	LXEJ02004818	1637231	2121534	+	99.82	93.12
NM_001110845.1	12293	Eve2	LXEJ02010051	15761	88478	-	99.62	7.1
NM_001110846.1	12293	Eve2	LXEJ02004818	1637231	2121534	+	99.82	93.1
NM_001110846.1	12293	Eve2	LXEJ02010051	15761	88478	-	99.62	7.12
NM_009793.3	12326	Eve2	LXEJ02004730	110811	230270	-	99.96	95.92
NM_009793.3	12326	Eve2	LXEJ02006911	180865	181369	+	100	4.09
NM_139148.2	229927	Eve2	LXEJ02007627	3934542	3947275	+	100	45.16
NM_139148.2	229927	Eve2	LXEJ02002647	1420	6908	+	100	53.29
NM_001081391.2	239420	Eve2	LXEJ02012362	25901	467090	-	99.99	84.21
NM_001081391.2	239420	Eve2	LXEJ02000717	40386	107020	+	100	3.87
NM_001081391.2	239420	Eve2	LXEJ02001477	27982	132085	-	99.37	3.67
NM_001081391.2	239420	Eve2	LXEJ02007987	93046	471614	+	97.18	7.02
NM_001099325.2	100042109	Eve2	LXEJ02012108	13612	29166	-	99.84	74.02
NM_001099325.2	100042109	Eve2	LXEJ02004975	941717	943388	-	100	25.38
NM_010747.2	17096	Eve2	LXEJ02005831	2393	37708	+	99.83	71.52
NM_010747.2	17096	Eve2	LXEJ02011318	7200	26384	-	98.9	29.47
NM_001111096.1	17096	Eve2	LXEJ02005831	2393	37708	+	99.83	70.22
NM_001111096.1	17096	Eve2	LXEJ02011318	7200	26384	-	98.87	30.75
NM_033269.4	12671	Eve2	LXEJ02003744	90373	92778	+	100	75.94
NM_033269.4	12671	Eve2	LXEJ02005689	65932	66474	+	99.81	17.14
NM_028892.4	74362	Eve2	LXEJ02007601	187443	281631	-	99.94	66.84
NM_028892.4	74362	Eve2	LXEJ02009979	32383	131856	+	99.51	31.73
NM_001081050.2	72823	Eve2	LXEJ02000245	34900	110100	-	99.59	58.36
NM_001081050.2	72823	Eve2	LXEJ02012458	6311	195158	-	100	11.82
NM_001081050.2	72823	Eve2	LXEJ02001269	37573	177438	+	99.21	21.13
NM_001081050.2	72823	Eve2	LXEJ02003096	53909	77938	+	98.86	7.31
NM_009680.3	11774	Eve2	LXEJ02002730	3409	192380	-	99.34	83.33
NM_009680.3	11774	Eve2	LXEJ02005695	83152	101713	-	100	21.21
NM_177698.4	234353	Eve2	LXEJ02003741	18889	88071	+	99.98	77.95
NM_177698.4	234353	Eve2	LXEJ02000833	14814	198476	-	100	22.03
NM_030263.5	234353	Eve2	LXEJ02003741	18889	88071	+	99.98	92.34
NM_030263.5	234353	Eve2	LXEJ02000833	14814	134853	-	100	7.66
NM_027626.1	234353	Eve2	LXEJ02003741	18892	88071	+	100	95.74
NM_027626.1	234353	Eve2	LXEJ02000833	14814	42209	-	100	4.24
NM_145078.2	112422	Eve2	LXEJ02000626	9635	16196	+	99.65	90.7
NM_145078.2	112422	Eve2	LXEJ02002839	510602	510927	+	89.22	12.5
NM_146072.4	14805	Eve2	LXEJ02009450	596394	1010157	-	99.46	87.15
NM_146072.4	14805	Eve2	LXEJ02007973	9206	31224	-	99.02	16.74
NM_010348.3	14805	Eve2	LXEJ02009450	596394	1010157	-	99.45	86.84
NM_010348.3	14805	Eve2	LXEJ02007973	9206	31224	-	99.02	17.15
NM_019691.4	14802	Eve2	LXEJ02010634	1299870	1546996	-	99.95	86.76
NM_019691.4	14802	Eve2	LXEJ02005367	47706	50130	+	100	13.3
NM_001113180.1	14802	Eve2	LXEJ02010634	1299870	1546996	-	99.95	86.76
NM_001113180.1	14802	Eve2	LXEJ02005367	47706	50130	+	100	13.3
NM_001113181.1	14802	Eve2	LXEJ02010634	1360190	1546996	-	99.93	69.16
NM_001113181.1	14802	Eve2	LXEJ02005367	47706	50130	+	100	31.05
NM_207216.2	105887	Eve2	LXEJ02010219	9260	20802	+	99.78	82.17
NM_207216.2	105887	Eve2	LXEJ02005474	1989939	2002202	-	100	19.33
NM_177879.5	330222	Eve2	LXEJ02010349	1574246	2222481	-	100	93.45
NM_177879.5	330222	Eve2	LXEJ02003261	63614	87647	-	98.17	7.08
NM_178723.6	241494	Eve2	LXEJ02005174	188148	281203	-	99.91	76.71
NM_178723.6	241494	Eve2	LXEJ02007866	134805	232181	+	98.58	23.9
NM_001113408.1	16825	Eve2	LXEJ02001280	7217	11018	+	99.37	82.93
NM_001113408.1	16825	Eve2	LXEJ02004103	248	631	-	100	18.19
NM_001113421.1	30953	Eve2	LXEJ02002319	25091	470524	-	99.88	40.24
NM_001113421.1	30953	Eve2	LXEJ02001679	101015	140206	-	99.63	61.37
NM_011648.5	22095	Eve2	LXEJ02000542	2911007	2958245	-	100	93.92
NM_011648.5	22095	Eve2	LXEJ02011240	44219	46924	-	98.28	6.67
NM_001113404.1	22095	Eve2	LXEJ02000542	2928973	2958245	-	100	80.53
NM_001113404.1	22095	Eve2	LXEJ02011240	11879	46924	-	94.3	27.11
NM_013661.2	20357	Eve2	LXEJ02000387	511822	530363	-	100	85.68
NM_013661.2	20357	Eve2	LXEJ02004508	132	104882	-	99.6	16.54
NM_001113468.1	76229	Eve2	LXEJ02004362	1184	8552	-	99.93	59.78
NM_001113468.1	76229	Eve2	LXEJ02006796	14328	24253	-	99.51	40.28
NM_001004357.2	66797	Eve2	LXEJ02010493	957873	1936989	-	99.78	71.47
NM_001004357.2	66797	Eve2	LXEJ02002766	13192	85209	+	99.68	4.51
NM_025789.5	66832	Eve2	LXEJ02008945	8800	18208	+	99.91	60.25
NM_025789.5	66832	Eve2	LXEJ02002219	32888	33577	+	100	35.2
NM_172544.3	18191	Eve2	LXEJ02000210	60544	257261	+	99.42	55.64
NM_172544.3	18191	Eve2	LXEJ02006179	628299	1708956	+	99.08	48.61
NM_011516.2	20957	Eve2	LXEJ02007184	8992	49235	-	100	51.41
NM_011516.2	20957	Eve2	LXEJ02003826	6498	8689	-	99.85	20.45
NM_011516.2	20957	Eve2	LXEJ02011321	3167	18109	-	98.8	19.43
NM_011544.3	21406	Eve2	LXEJ02004846	20870	120638	+	99.97	87.57
NM_011544.3	21406	Eve2	LXEJ02005670	1117064	1228466	+	99.83	12.64
NM_183087.4	70638	Eve2	LXEJ02006315	5236	69044	+	99.88	87.71
NM_183087.4	70638	Eve2	LXEJ02007638	586549	900113	+	98.5	11.1
NM_029760.2	76826	Eve2	LXEJ02011991	2405314	2445235	-	100	53.98
NM_029760.2	76826	Eve2	LXEJ02005391	12573	15328	+	100	26.74
NM_001114383.1	434865	Eve2	LXEJ02004588	2928	25514	+	99.68	62.07
NM_001114383.1	434865	Eve2	LXEJ02010869	3842	12173	+	98.57	38.07
NM_031389.2	83564	Eve2	LXEJ02003210	954	13708	-	99.77	62.17
NM_031389.2	83564	Eve2	LXEJ02001392	5124	25731	+	99.92	36.3
NM_172440.3	207227	Eve2	LXEJ02003293	134755	143499	-	99.98	71.37
NM_172440.3	207227	Eve2	LXEJ02003272	868647	1131889	+	99.71	28.79
NM_001114611.1	207227	Eve2	LXEJ02003293	134755	143499	-	99.98	72.84
NM_001114611.1	207227	Eve2	LXEJ02003272	868647	1131889	+	99.69	27.33
NM_001114612.1	207227	Eve2	LXEJ02003293	134755	143499	-	99.98	71.8
NM_001114612.1	207227	Eve2	LXEJ02003272	868647	1131889	+	99.7	28.36
NM_001114613.1	207227	Eve2	LXEJ02003293	134755	143499	-	99.98	72.4
NM_001114613.1	207227	Eve2	LXEJ02003272	868647	1131889	+	99.69	27.77
NM_001109969.2	100039240	Eve2	LXEJ02012108	13597	29166	-	100	74.46
NM_001109969.2	100039240	Eve2	LXEJ02004975	941717	943388	-	100	25.75
NM_001114663.1	227120	Eve2	LXEJ02003807	350831	409380	-	99.98	89.53
NM_001114663.1	227120	Eve2	LXEJ02007554	37968	70606	-	97.9	11.63
NM_019457.2	54562	Eve2	LXEJ02005109	3888	80868	+	99.93	73.7
NM_019457.2	54562	Eve2	LXEJ02004134	155083	186178	+	100	26.63
NM_001101534.1	434121	Eve2	LXEJ02002138	15422	37510	-	100	51.45
NM_001101534.1	434121	Eve2	LXEJ02008928	19881	47434	-	99	52.07
NM_007525.3	12021	Eve2	LXEJ02012084	5263	53210	+	99.95	90.74
NM_007525.3	12021	Eve2	LXEJ02002236	6902	20403	-	100	6.64
NM_001033532.3	225289	Eve2	LXEJ02008956	1251586	1319008	-	100	74.71
NM_001033532.3	225289	Eve2	LXEJ02005578	20554	75582	-	99.66	16.81
NM_001033532.3	225289	Eve2	LXEJ02010151	2537295	2582744	+	96.33	10.08
NM_177355.3	239318	Eve2	LXEJ02002790	8776	67748	-	100	83.17
NM_177355.3	239318	Eve2	LXEJ02012289	40723	41048	-	100	17.11
NM_001122603.1	215384	Eve2	LXEJ02008327	1	26085	+	100	54.52
NM_001122603.1	215384	Eve2	LXEJ02002076	6267	18533	+	100	41.13
NM_001122603.1	215384	Eve2	LXEJ02003496	40855	45028	-	99.76	5.35
NM_175642.4	210933	Eve2	LXEJ02003636	159769	327691	+	100	50.36
NM_175642.4	210933	Eve2	LXEJ02012265	21480	105950	+	100	16.58
NM_175642.4	210933	Eve2	LXEJ02007745	34972	62970	+	100	13.94
NM_175642.4	210933	Eve2	LXEJ02004571	126396	162564	-	97.02	21.16
NM_027886.3	71728	Eve2	LXEJ02005274	808352	819467	+	100	54.62
NM_027886.3	71728	Eve2	LXEJ02003408	169948	174637	-	99.95	45.15
NM_001122735.1	382244	Eve2	LXEJ02004588	2928	25514	+	99.2	62.04
NM_001122735.1	382244	Eve2	LXEJ02010869	3842	12173	+	99.35	38.1
NM_029270.2	231532	Eve2	LXEJ02003840	41925	283311	-	99.85	81.11
NM_029270.2	231532	Eve2	LXEJ02002824	36244	112275	+	98.43	20.93
NM_146161.3	231532	Eve2	LXEJ02003840	41925	283311	-	99.85	86.1
NM_146161.3	231532	Eve2	LXEJ02002824	36244	36716	+	100	14.97
NM_026840.3	68797	Eve2	LXEJ02004731	174267	188098	-	100	68.22
NM_026840.3	68797	Eve2	LXEJ02004167	83632	95795	+	100	31.77
NM_033620.2	93742	Eve2	LXEJ02011426	2294	371577	+	99.77	91.87
NM_033620.2	93742	Eve2	LXEJ02004901	76682	174276	-	99.8	8.97
NM_001122850.1	93742	Eve2	LXEJ02011426	2294	161371	+	99.67	88.7
NM_001122850.1	93742	Eve2	LXEJ02004901	76682	174276	-	99.8	12.51
NM_176996.4	319757	Eve2	LXEJ02004924	5902	13801	+	99.96	78.52
NM_176996.4	319757	Eve2	LXEJ02004983	11401	12256	-	99.76	21.52
NM_010433.2	15258	Eve2	LXEJ02007436	421358	445118	-	100	41.69
NM_010433.2	15258	Eve2	LXEJ02012467	2965	149228	-	100	58.34
NM_145841.2	244431	Eve2	LXEJ02007476	38796	55949	-	99.9	46.12
NM_145841.2	244431	Eve2	LXEJ02010157	118942	119727	+	99.87	32.9
NM_010917.2	18073	Eve2	LXEJ02000840	3017168	3065712	+	99.98	94.62
NM_010917.2	18073	Eve2	LXEJ02002485	23221	23549	-	99.39	5.44
NM_146146.2	16847	Eve2	LXEJ02008852	2483297	2518091	-	100	37.32
NM_146146.2	16847	Eve2	LXEJ02003880	8435	35696	+	99.12	41.29
NM_146146.2	16847	Eve2	LXEJ02010992	47178	48094	-	99.56	22.22
NM_001122899.1	16847	Eve2	LXEJ02008852	2483297	2518091	-	100	27.64
NM_001122899.1	16847	Eve2	LXEJ02003880	8435	35698	+	98.95	30.67
NM_001122899.1	16847	Eve2	LXEJ02010992	48865	51189	-	99.95	41.97
NM_010704.2	16847	Eve2	LXEJ02008852	2483297	2518091	-	100	45.2
NM_010704.2	16847	Eve2	LXEJ02003880	8435	35858	+	100	54.85
NM_008580.4	26408	Eve2	LXEJ02004848	1509472	1651637	-	99.97	89.8
NM_008580.4	26408	Eve2	LXEJ02002151	154707	167784	+	99.3	10.62
NM_207667.3	14169	Eve2	LXEJ02011998	1239083	1397082	-	99.96	80.92
NM_207667.3	14169	Eve2	LXEJ02004870	7734	19872	-	98.5	20.59
NM_010130.4	13733	Eve2	LXEJ02007967	8268	50538	+	100	54.05
NM_010130.4	13733	Eve2	LXEJ02006878	570	18071	-	100	36.42
NM_029525.1	109294	Eve2	LXEJ02005081	311583	349587	-	100	57.96
NM_029525.1	109294	Eve2	LXEJ02006541	5202	262576	-	99.83	42.73
NM_001039555.2	433247	Eve2	LXEJ02009215	22064	28878	+	99.88	49.38
NM_001039555.2	433247	Eve2	LXEJ02005402	760	19574	+	99.1	44.03
NM_145467.2	223272	Eve2	LXEJ02003520	4795	21814	+	100	23.54
NM_145467.2	223272	Eve2	LXEJ02003556	45425	46794	+	100	20.61
NM_145467.2	223272	Eve2	LXEJ02011998	1193787	1234871	+	98.73	53.5
NM_021416.3	58227	Eve2	LXEJ02009879	115766	170799	-	100	90.12
NM_021416.3	58227	Eve2	LXEJ02001141	9863	40274	+	95.15	12.81
NM_178415.1	319845	Eve2	LXEJ02004933	28566	242162	-	99.72	73.9
NM_178415.1	319845	Eve2	LXEJ02009978	45326	46025	+	100	15.32
NM_178415.1	319845	Eve2	LXEJ02006797	65298	84093	+	100	11.95
NM_181316.4	319845	Eve2	LXEJ02004933	28566	242162	-	99.71	73.47
NM_181316.4	319845	Eve2	LXEJ02009978	45326	46025	+	100	15.58
NM_181316.4	319845	Eve2	LXEJ02006797	65298	84093	+	100	12.15
NM_172646.2	103967	Eve2	LXEJ02008027	37015	76624	+	99.68	55.09
NM_172646.2	103967	Eve2	LXEJ02012492	6324	53619	-	100	20.91
NM_172646.2	103967	Eve2	LXEJ02010606	11423	136021	+	99.75	17.53
NM_177151.3	666173	Eve2	LXEJ02002804	1974209	2179141	-	99.64	54.94
NM_177151.3	666173	Eve2	LXEJ02012041	22167	181205	+	99.5	21.03
NM_177151.3	666173	Eve2	LXEJ02008520	9542	79530	+	99.03	15.48
NM_177151.3	666173	Eve2	LXEJ02001367	5425	31848	-	99.37	5.98
NM_177151.3	666173	Eve2	LXEJ02002682	906	11121	-	96.6	4.53
NM_023718.3	28254	Eve2	LXEJ02007295	2322	37737	+	99.24	75.24
NM_023718.3	28254	Eve2	LXEJ02000483	5498	35168	+	98.16	15.47
NM_001134743.1	243499	Eve2	LXEJ02005194	152117	153294	+	100	38.83
NM_001134743.1	243499	Eve2	LXEJ02009635	623235	651282	-	98.78	64.57
NM_053099.2	240427	Eve2	LXEJ02000764	2976	112521	+	99.98	91.13
NM_053099.2	240427	Eve2	LXEJ02000385	504475	690097	-	100	8.9
NM_027823.1	71544	Eve2	LXEJ02004174	205349	269578	-	99.97	88.6
NM_027823.1	71544	Eve2	LXEJ02003285	49701	173013	-	100	11.45
NM_029056.1	74691	Eve2	LXEJ02008195	8679	84141	-	100	79.06
NM_029056.1	74691	Eve2	LXEJ02008540	3456	11046	+	99.86	15.8
NM_001004176.2	433586	Eve2	LXEJ02000821	2133	172964	+	100	79.61
NM_001004176.2	433586	Eve2	LXEJ02011067	209483	245706	-	98.07	22.1
NM_028709.2	74007	Eve2	LXEJ02011082	49154	110721	-	100	65.13
NM_028709.2	74007	Eve2	LXEJ02004919	6390	30761	-	98.04	31.49
NM_028709.2	74007	Eve2	LXEJ02004433	130705	173245	+	95.23	8.29
NM_001135559.1	20663	Eve2	LXEJ02008603	36336	103252	-	99.65	92.24
NM_001135559.1	20663	Eve2	LXEJ02006453	4412	28306	-	100	8.28
NM_153589.2	243634	Eve2	LXEJ02007284	992945	1318681	+	100	74.34
NM_153589.2	243634	Eve2	LXEJ02007089	863412	866701	-	100	25.48
NM_001136260.1	54403	Eve2	LXEJ02004814	5350	122598	+	100	88.23
NM_001136260.1	54403	Eve2	LXEJ02004728	14348	225805	+	98.09	12.72
NM_183368.2	83672	Eve2	LXEJ02008945	184838	195103	-	100	66.55
NM_183368.2	83672	Eve2	LXEJ02004623	24060	33736	+	99.19	32.84
NM_031395.2	83672	Eve2	LXEJ02008945	184838	195103	-	100	43.37
NM_031395.2	83672	Eve2	LXEJ02004623	5515	33736	+	99.01	30.58
NM_031395.2	83672	Eve2	LXEJ02000192	18293	32466	+	100	29.07
NM_183370.2	83672	Eve2	LXEJ02008945	184838	195103	-	100	58.13
NM_183370.2	83672	Eve2	LXEJ02004623	7337	33736	+	99.71	41.34
NM_028797.1	74174	Eve2	LXEJ02004948	796404	803667	-	100	32.22
NM_028797.1	74174	Eve2	LXEJ02002321	230787	241266	+	98.61	67.97
NM_001136476.1	664829	Eve2	LXEJ02012108	13593	29166	-	98.64	72.07
NM_001136476.1	664829	Eve2	LXEJ02010843	812	8752	-	98.34	39.17
NM_001142570.1	93837	Eve2	LXEJ02001516	32307	162689	+	100	84.59
NM_001142570.1	93837	Eve2	LXEJ02002156	20636	21315	+	100	11.35
NM_023115.3	11994	Eve2	LXEJ02000451	14779	74950	-	100	7.95
NM_023115.3	11994	Eve2	LXEJ02012020	5331	18896	+	100	53.19
NM_023115.3	11994	Eve2	LXEJ02010725	4048	55788	-	99.56	10.15
NM_023115.3	11994	Eve2	LXEJ02010566	11088	162112	+	98.97	18.21
NM_023115.3	11994	Eve2	LXEJ02002845	90790	320562	-	100	6.56
NM_023115.3	11994	Eve2	LXEJ02010715	12125	85144	+	97.95	5.35
NM_001142735.1	11994	Eve2	LXEJ02000451	14779	74950	-	100	7.96
NM_001142735.1	11994	Eve2	LXEJ02012020	5331	18896	+	100	53.28
NM_001142735.1	11994	Eve2	LXEJ02010725	4048	55788	-	99.56	10.16
NM_001142735.1	11994	Eve2	LXEJ02010566	11088	162112	+	98.97	18.24
NM_001142735.1	11994	Eve2	LXEJ02002845	90790	320562	-	100	6.4
NM_001142735.1	11994	Eve2	LXEJ02010715	12125	85144	+	97.95	5.35
NM_001142736.1	11994	Eve2	LXEJ02000451	14779	74950	-	100	7.97
NM_001142736.1	11994	Eve2	LXEJ02012020	5331	18896	+	100	53.25
NM_001142736.1	11994	Eve2	LXEJ02010725	4048	55788	-	99.56	10.17
NM_001142736.1	11994	Eve2	LXEJ02010566	11088	162112	+	99.38	17.96
NM_001142736.1	11994	Eve2	LXEJ02002845	90790	320562	-	100	6.41
NM_001142736.1	11994	Eve2	LXEJ02010715	12125	85144	+	97.95	5.36
NM_001142737.1	11994	Eve2	LXEJ02000451	14779	74950	-	100	8.15
NM_001142737.1	11994	Eve2	LXEJ02012020	5331	18896	+	100	54.57
NM_001142737.1	11994	Eve2	LXEJ02010725	4061	55788	-	100	10.27
NM_001142737.1	11994	Eve2	LXEJ02010566	11088	162112	+	98.97	18.68
NM_001142737.1	11994	Eve2	LXEJ02002845	90790	320562	-	100	6.56
NM_001142738.1	11994	Eve2	LXEJ02000451	14779	74950	-	100	6.83
NM_001142738.1	11994	Eve2	LXEJ02012020	5331	18896	+	100	53.87
NM_001142738.1	11994	Eve2	LXEJ02010725	4048	55788	-	99.56	10.31
NM_001142738.1	11994	Eve2	LXEJ02010566	11088	162112	+	99.38	18.21
NM_001142738.1	11994	Eve2	LXEJ02002845	90790	320562	-	100	6.5
NM_001142738.1	11994	Eve2	LXEJ02010715	12125	79841	+	94.44	6.32
NM_001142739.1	11994	Eve2	LXEJ02000451	14779	74950	-	100	8.02
NM_001142739.1	11994	Eve2	LXEJ02012020	5331	18896	+	100	53.67
NM_001142739.1	11994	Eve2	LXEJ02010725	4048	55788	-	99.56	10.24
NM_001142739.1	11994	Eve2	LXEJ02010566	11088	162112	+	98.97	18.37
NM_001142739.1	11994	Eve2	LXEJ02002845	195293	320562	-	100	5.73
NM_001142739.1	11994	Eve2	LXEJ02010715	12125	85144	+	97.95	5.39
NM_001142740.1	11994	Eve2	LXEJ02000451	14779	74950	-	100	7.98
NM_001142740.1	11994	Eve2	LXEJ02012020	5331	18896	+	100	53.21
NM_001142740.1	11994	Eve2	LXEJ02010725	4048	55788	-	99.56	10.18
NM_001142740.1	11994	Eve2	LXEJ02010566	11088	162112	+	99.38	17.98
NM_001142740.1	11994	Eve2	LXEJ02002845	90790	320562	-	100	6.42
NM_001142740.1	11994	Eve2	LXEJ02010715	12125	79841	+	94.44	6.24
NM_001142741.1	11994	Eve2	LXEJ02000451	14779	74950	-	100	8.03
NM_001142741.1	11994	Eve2	LXEJ02012020	5331	18896	+	100	53.63
NM_001142741.1	11994	Eve2	LXEJ02010725	4048	55788	-	99.56	10.25
NM_001142741.1	11994	Eve2	LXEJ02010566	11088	162112	+	98.97	18.39
NM_001142741.1	11994	Eve2	LXEJ02002845	195293	320562	-	100	5.73
NM_001142741.1	11994	Eve2	LXEJ02010715	12125	85144	+	97.95	5.4
NM_001142742.1	11994	Eve2	LXEJ02000451	14779	74950	-	100	11.43
NM_001142742.1	11994	Eve2	LXEJ02012020	5331	28858	+	100	32.36
NM_001142742.1	11994	Eve2	LXEJ02010725	4048	55788	-	99.57	14.92
NM_001142742.1	11994	Eve2	LXEJ02010566	11088	155308	+	99.62	25.27
NM_001142742.1	11994	Eve2	LXEJ02002845	90790	320562	-	100	9.43
NM_001142742.1	11994	Eve2	LXEJ02010715	12125	72344	+	97.08	8.12
NM_001142743.1	11994	Eve2	LXEJ02000451	14779	74950	-	100	11.37
NM_001142743.1	11994	Eve2	LXEJ02012020	5331	28858	+	100	33.3
NM_001142743.1	11994	Eve2	LXEJ02010725	4048	55788	-	99.56	14.51
NM_001142743.1	11994	Eve2	LXEJ02010566	11088	155308	+	99.62	25.13
NM_001142743.1	11994	Eve2	LXEJ02002845	90790	320562	-	100	9.15
NM_001142743.1	11994	Eve2	LXEJ02010715	12125	72344	+	97.08	8.07
NM_001142746.1	11994	Eve2	LXEJ02000451	14779	74950	-	100	7.87
NM_001142746.1	11994	Eve2	LXEJ02012020	5331	33868	+	100	53.56
NM_001142746.1	11994	Eve2	LXEJ02010725	4048	55788	-	99.56	10.05
NM_001142746.1	11994	Eve2	LXEJ02010566	11088	155308	+	99.62	17.4
NM_001142746.1	11994	Eve2	LXEJ02002845	90790	320562	-	100	6.5
NM_001142746.1	11994	Eve2	LXEJ02010715	12125	52751	+	99.77	4.83
NM_001142747.1	11994	Eve2	LXEJ02000451	14779	74950	-	100	14.55
NM_001142747.1	11994	Eve2	LXEJ02010725	4048	55788	-	99.56	18.57
NM_001142747.1	11994	Eve2	LXEJ02010566	11088	68530	+	100	46.38
NM_001142747.1	11994	Eve2	LXEJ02002845	56815	320562	-	97.75	13.44
NM_001142747.1	11994	Eve2	LXEJ02010715	12125	52751	+	99.77	8.92
NM_001142748.1	11994	Eve2	LXEJ02000451	14779	74950	-	100	14.59
NM_001142748.1	11994	Eve2	LXEJ02010725	4048	55788	-	99.56	18.62
NM_001142748.1	11994	Eve2	LXEJ02010566	11088	68530	+	100	46.52
NM_001142748.1	11994	Eve2	LXEJ02002845	56815	320562	-	97.7	13.18
NM_001142748.1	11994	Eve2	LXEJ02010715	12125	52751	+	99.77	8.94
NM_001142760.1	11994	Eve2	LXEJ02000451	14779	74950	-	100	7.89
NM_001142760.1	11994	Eve2	LXEJ02012020	5331	33868	+	100	53.65
NM_001142760.1	11994	Eve2	LXEJ02010725	4048	55788	-	99.56	10.07
NM_001142760.1	11994	Eve2	LXEJ02010566	11088	155308	+	99.62	17.43
NM_001142760.1	11994	Eve2	LXEJ02002845	90790	320562	-	100	6.34
NM_001142760.1	11994	Eve2	LXEJ02010715	12125	52751	+	99.77	4.83
NM_024244.4	71721	Eve2	LXEJ02002074	3788	10827	+	100	57.63
NM_024244.4	71721	Eve2	LXEJ02004967	1203499	1307131	+	99.78	42.56
NM_001143776.1	71721	Eve2	LXEJ02002074	3788	10827	+	100	57.6
NM_001143776.1	71721	Eve2	LXEJ02004967	1203499	1307131	+	99.78	42.6
NM_001143777.1	71721	Eve2	LXEJ02002074	3788	10827	+	100	55.86
NM_001143777.1	71721	Eve2	LXEJ02004967	1203257	1307131	+	99.8	44.32
NM_001143956.1	240879	Eve2	LXEJ02011096	48495	56644	+	100	48.24
NM_001143956.1	240879	Eve2	LXEJ02002881	684154	685422	-	99.27	52.7
NM_177006.3	319807	Eve2	LXEJ02009880	201670	287131	-	100	85.73
NM_177006.3	319807	Eve2	LXEJ02008827	7970	9190	-	99.91	14.29
NM_001145096.1	654498	Eve2	LXEJ02005109	518175	547997	+	99.57	83.28
NM_001145096.1	654498	Eve2	LXEJ02002305	83850	95237	+	99.27	18.39
NM_172895.3	243822	Eve2	LXEJ02007982	2194	8776	+	100	71.71
NM_172895.3	243822	Eve2	LXEJ02001199	387442	388473	+	100	27.42
NM_001145676.1	72371	Eve2	LXEJ02001394	227876	426699	+	100	76.76
NM_001145676.1	72371	Eve2	LXEJ02007543	11643	15239	+	99.91	23.77
NM_008547.2	17152	Eve2	LXEJ02002826	209719	241541	-	99.96	90.31
NM_008547.2	17152	Eve2	LXEJ02006829	5133	5462	-	100	9.74
NM_001145802.1	17152	Eve2	LXEJ02002826	209719	241541	-	99.96	86.77
NM_001145802.1	17152	Eve2	LXEJ02006829	5133	14701	-	100	13.28
NM_001145803.1	17152	Eve2	LXEJ02002826	209719	241541	-	99.96	87.84
NM_001145803.1	17152	Eve2	LXEJ02006829	5133	14701	-	100	12.21
NM_153539.3	215378	Eve2	LXEJ02012643	33026	34499	+	100	47.27
NM_153539.3	215378	Eve2	LXEJ02002777	86625	109157	-	98.78	23.73
NM_153539.3	215378	Eve2	LXEJ02000444	6095	105560	-	98.03	26.04
NM_001145807.1	215378	Eve2	LXEJ02012643	33026	34499	+	100	53.4
NM_001145807.1	215378	Eve2	LXEJ02002777	86625	107136	-	97.65	13.84
NM_001145807.1	215378	Eve2	LXEJ02000444	6095	75517	-	99.32	26.73
NM_207583.2	240843	Eve2	LXEJ02002611	13921	93312	+	99.76	82.95
NM_207583.2	240843	Eve2	LXEJ02005667	18306	19051	-	99.86	18.11
NM_008625.2	17533	Eve2	LXEJ02011309	27122	55035	-	100	54.09
NM_008625.2	17533	Eve2	LXEJ02002749	615994	666710	+	99.57	35.64
NM_008625.2	17533	Eve2	LXEJ02004028	6791	12761	+	99.3	10.78
NM_001081231.2	269629	Eve2	LXEJ02004828	501653	675503	-	100	85.47
NM_001081231.2	269629	Eve2	LXEJ02009094	1485173	1488879	+	98.07	15.66
NM_029990.1	269629	Eve2	LXEJ02004828	501653	675503	-	100	85.23
NM_029990.1	269629	Eve2	LXEJ02009094	1485173	1485608	+	99.77	14.86
NM_172910.3	244310	Eve2	LXEJ02008547	223800	540580	+	100	90.77
NM_172910.3	244310	Eve2	LXEJ02003806	2198639	2282448	+	99.73	8.22
NM_001145965.1	244310	Eve2	LXEJ02008547	223800	540580	+	100	92.81
NM_001145965.1	244310	Eve2	LXEJ02003806	2198639	2198907	+	100	6.07
NM_175029.3	242557	Eve2	LXEJ02000531	492392	500009	-	99.5	44.61
NM_175029.3	242557	Eve2	LXEJ02007154	16164	64937	+	99.03	60.81
NM_001145967.1	242557	Eve2	LXEJ02000531	492392	500009	-	99.5	50.71
NM_001145967.1	242557	Eve2	LXEJ02007154	16377	64937	+	98.8	55.57
NM_181422.3	329064	Eve2	LXEJ02008551	1035054	1044722	-	100	80.57
NM_181422.3	329064	Eve2	LXEJ02001306	21724	22745	+	100	15.56
NM_178721.4	239857	Eve2	LXEJ02012527	104690	332120	-	100	92.02
NM_178721.4	239857	Eve2	LXEJ02001079	51380	52117	-	100	7.7
NM_001145977.1	239857	Eve2	LXEJ02012527	104690	332128	-	99.95	92.36
NM_001145977.1	239857	Eve2	LXEJ02001079	51377	52117	-	99.86	7.75
NM_023670.3	140488	Eve2	LXEJ02004945	7462	29700	+	100	70.07
NM_023670.3	140488	Eve2	LXEJ02012148	59599	170358	+	100	38.61
NM_181407.4	109264	Eve2	LXEJ02005031	684897	705561	-	99.94	79.45
NM_181407.4	109264	Eve2	LXEJ02009539	19258	39577	-	100	7.89
NM_181407.4	109264	Eve2	LXEJ02001638	47129	50461	+	99.65	6.59
NM_181407.4	109264	Eve2	LXEJ02007576	58879	59163	+	98.94	6.52
NM_176930.4	319504	Eve2	LXEJ02008079	48511	120563	-	99.77	94.46
NM_176930.4	319504	Eve2	LXEJ02004575	70136	219928	+	95.92	7.35
NM_001146031.1	319504	Eve2	LXEJ02008079	48511	120563	-	99.76	94.3
NM_001146031.1	319504	Eve2	LXEJ02004575	70136	219928	+	95.92	7.56
NM_175210.3	74591	Eve2	LXEJ02005305	2550	159365	-	100	90.92
NM_175210.3	74591	Eve2	LXEJ02009850	82708	89577	-	100	9.09
NM_198007.2	77987	Eve2	LXEJ02002782	1870293	2043360	+	99.76	68.5
NM_198007.2	77987	Eve2	LXEJ02005958	26215	94273	+	100	32.45
NM_010438.3	15275	Eve2	LXEJ02011410	123543	221526	+	100	53.78
NM_010438.3	15275	Eve2	LXEJ02000380	547605	560659	-	99.89	48.19
NM_001146100.1	15275	Eve2	LXEJ02011410	162950	221526	+	100	54.41
NM_001146100.1	15275	Eve2	LXEJ02000380	547605	560659	-	99.89	47.53
NM_011215.2	19276	Eve2	LXEJ02005100	1044985	1161532	-	100	59.66
NM_011215.2	19276	Eve2	LXEJ02004723	32419	208708	-	98.91	27.53
NM_011215.2	19276	Eve2	LXEJ02008724	29661	46772	+	97.61	6.14
NM_011215.2	19276	Eve2	LXEJ02002717	55917	56222	-	90.85	6.33
NM_173422.3	239447	Eve2	LXEJ02003427	83377	102718	-	99.7	94.87
NM_173422.3	239447	Eve2	LXEJ02002195	5169	33628	-	100	6.49
NM_177077.2	75914	Eve2	LXEJ02009440	1401737	1427282	-	99.44	59.26
NM_177077.2	75914	Eve2	LXEJ02007800	63	298733	-	98.77	43.18
NM_028483.1	73259	Eve2	LXEJ02009297	19396	33596	+	100	69.79
NM_028483.1	73259	Eve2	LXEJ02005306	2233492	2266154	+	95.8	39.84
NM_178934.4	353169	Eve2	LXEJ02008931	28753	38639	-	100	52.95
NM_178934.4	353169	Eve2	LXEJ02009670	15402	36097	-	100	43.77
NM_001013411.2	432450	Eve2	LXEJ02001830	57273	129201	+	99.96	78.72
NM_001013411.2	432450	Eve2	LXEJ02001555	70445	70731	-	98.25	8.92
NM_001025286.2	432450	Eve2	LXEJ02004353	68316	69056	-	100	60.09
NM_001025286.2	432450	Eve2	LXEJ02001555	48115	70731	-	95.32	29.11
NM_027913.1	71768	Eve2	LXEJ02012168	475	12644	+	99.94	51.77
NM_027913.1	71768	Eve2	LXEJ02005146	1327	14043	-	100	40.9
NM_001014981.1	104082	Eve2	LXEJ02005206	169130	364637	+	100	55.53
NM_001014981.1	104082	Eve2	LXEJ02012251	1517	74384	+	99.71	45.06
NM_008786.2	18537	Eve2	LXEJ02007857	70094	70836	-	100	38.75
NM_008786.2	18537	Eve2	LXEJ02011798	2394	27966	-	100	61.39
NM_015773.2	50525	Eve2	LXEJ02011914	96385	136037	-	99.86	89.65
NM_015773.2	50525	Eve2	LXEJ02008704	11389	11734	+	100	10.75
NM_001159354.1	99470	Eve2	LXEJ02001599	314903	407668	-	100	88.45
NM_001159354.1	99470	Eve2	LXEJ02006364	1118362	1119124	+	100	11.59
NM_133853.3	99470	Eve2	LXEJ02001599	314903	407668	-	100	88.6
NM_133853.3	99470	Eve2	LXEJ02006364	1118362	1119124	+	100	11.43
NM_177589.3	209012	Eve2	LXEJ02002316	187277	431167	-	99.73	55.83
NM_177589.3	209012	Eve2	LXEJ02011892	52162	84983	+	99.61	44.83
NM_027906.1	219189	Eve2	LXEJ02006346	5629	165750	+	99.93	44.19
NM_027906.1	219189	Eve2	LXEJ02011432	1957	6857	+	100	22.41
NM_027906.1	219189	Eve2	LXEJ02008898	3466754	3486430	+	100	4.96
NM_027906.1	219189	Eve2	LXEJ02007505	9873	12266	-	100	4.15
NM_027906.1	219189	Eve2	LXEJ02006832	11008	97313	+	99.45	23.68
NM_173758.3	219189	Eve2	LXEJ02006346	5629	61734	+	100	41.19
NM_173758.3	219189	Eve2	LXEJ02008898	3466754	3486430	+	100	9.86
NM_173758.3	219189	Eve2	LXEJ02006832	11008	97313	+	99.45	47.07
NM_007643.4	12491	Eve2	LXEJ02004775	8092	30975	-	100	32.89
NM_007643.4	12491	Eve2	LXEJ02004818	3538754	3555364	-	100	65.92
NM_001159555.1	12491	Eve2	LXEJ02004775	8092	30975	-	100	32.83
NM_001159555.1	12491	Eve2	LXEJ02004818	3538754	3555364	-	100	65.97
NM_001159556.1	12491	Eve2	LXEJ02004775	8092	44871	-	100	30.06
NM_001159556.1	12491	Eve2	LXEJ02004818	3538754	3555364	-	100	68.69
NM_001159557.1	12491	Eve2	LXEJ02004775	8092	44871	-	100	31.1
NM_001159557.1	12491	Eve2	LXEJ02004818	3538754	3555364	-	100	67.68
NM_001159558.1	12491	Eve2	LXEJ02004775	8092	84028	-	100	33.34
NM_001159558.1	12491	Eve2	LXEJ02004818	3538754	3555364	-	100	65.47
NM_007820.2	13114	Eve2	LXEJ02004249	50004	70676	+	98.86	65.83
NM_007820.2	13114	Eve2	LXEJ02005783	5599	11478	-	99.2	36.24
NM_178617.4	69352	Eve2	LXEJ02010350	1532371	1585233	-	100	88.37
NM_178617.4	69352	Eve2	LXEJ02012268	113301	114852	-	97.95	6.86
NM_008792.4	18549	Eve2	LXEJ02008886	4658	52443	+	99.81	80.14
NM_008792.4	18549	Eve2	LXEJ02006539	1459399	1486828	-	98.18	13.7
NM_008792.4	18549	Eve2	LXEJ02003698	9338	59335	-	89.04	10.4
NM_016744.4	18573	Eve2	LXEJ02004049	1307	74707	+	99.2	35.15
NM_016744.4	18573	Eve2	LXEJ02012356	694684	1006750	+	98.19	73.17
NM_001159582.1	18573	Eve2	LXEJ02004049	11949	74707	+	99.93	32.49
NM_001159582.1	18573	Eve2	LXEJ02012356	694243	1006750	+	98.3	74.39
NM_178675.4	215085	Eve2	LXEJ02008340	168899	374938	+	100	86.6
NM_178675.4	215085	Eve2	LXEJ02012408	56073	71343	-	99.14	14.13
NM_145947.2	208890	Eve2	LXEJ02009537	22050	82533	+	100	74.6
NM_145947.2	208890	Eve2	LXEJ02001778	7870	39348	-	100	25.6
NM_173029.3	271639	Eve2	LXEJ02007995	5330	43721	+	100	67.86
NM_173029.3	271639	Eve2	LXEJ02000407	70280	107061	+	100	31.08
NM_010417.2	15203	Eve2	LXEJ02004270	11488	32131	+	100	34.29
NM_010417.2	15203	Eve2	LXEJ02006944	4596	79693	-	99.67	65.77
NM_001159627.1	15203	Eve2	LXEJ02004270	11488	32131	+	100	34.34
NM_001159627.1	15203	Eve2	LXEJ02006944	4596	78783	-	99.67	65.72
NM_001159628.1	15203	Eve2	LXEJ02004270	11488	32131	+	100	34.24
NM_001159628.1	15203	Eve2	LXEJ02006944	4596	79693	-	99.67	66.2
NM_133891.3	100434	Eve2	LXEJ02011544	386484	531326	+	99.51	73.72
NM_133891.3	100434	Eve2	LXEJ02011097	5329	6212	+	100	28.49
NM_198117.2	353234	Eve2	LXEJ02008908	410896	442402	-	100	53.42
NM_198117.2	353234	Eve2	LXEJ02011707	39509	42009	-	100	46.49
NM_153135.3	210801	Eve2	LXEJ02000203	362668	560762	+	100	91.77
NM_153135.3	210801	Eve2	LXEJ02007278	134995	135400	+	99.01	4.39
NM_153135.3	210801	Eve2	LXEJ02008714	1692	25555	-	91.46	5.23
NM_001025568.2	18575	Eve2	LXEJ02004565	3519	84869	+	99.96	92.45
NM_001025568.2	18575	Eve2	LXEJ02002051	117326	117988	-	98.36	7.47
NM_011054.4	18575	Eve2	LXEJ02004565	3519	105415	+	99.95	86.22
NM_011054.4	18575	Eve2	LXEJ02002051	95483	118115	-	95.65	16.46
NM_001159952.1	18575	Eve2	LXEJ02004565	3511	84869	+	99.84	92.82
NM_001159952.1	18575	Eve2	LXEJ02002051	117337	117988	-	99.84	7.37
NM_001159953.1	18575	Eve2	LXEJ02004565	3519	115596	+	99.93	82.92
NM_001159953.1	18575	Eve2	LXEJ02002051	117326	117988	-	98.36	16.96
NM_001159960.1	18575	Eve2	LXEJ02004565	3519	84869	+	99.96	93.79
NM_001159960.1	18575	Eve2	LXEJ02002051	117326	118482	-	97.98	6.14
NM_030025.2	78016	Eve2	LXEJ02007305	1172	97413	+	100	79.9
NM_030025.2	78016	Eve2	LXEJ02010578	1855	15124	+	100	20.14
NM_013862.5	29809	Eve2	LXEJ02005667	1955340	2090989	-	99.79	28.69
NM_013862.5	29809	Eve2	LXEJ02005060	7240	154985	-	99.94	53.57
NM_013862.5	29809	Eve2	LXEJ02003442	37899	249516	+	97.22	21.22
NM_025819.4	66875	Eve2	LXEJ02009240	111112	148109	+	100	59.35
NM_025819.4	66875	Eve2	LXEJ02003560	1731	22808	+	99.73	40.94
NM_026604.4	68187	Eve2	LXEJ02010155	1124286	1181503	-	100	92.43
NM_026604.4	68187	Eve2	LXEJ02002111	241970	256737	+	100	7.56
NM_008142.4	14688	Eve2	LXEJ02002227	352363	359980	-	100	76.58
NM_008142.4	14688	Eve2	LXEJ02005276	7706	59590	-	95.59	25.48
NM_001160016.1	14688	Eve2	LXEJ02002227	352363	359980	-	100	76.56
NM_001160016.1	14688	Eve2	LXEJ02005276	7706	59590	-	95.59	25.5
NM_001160017.1	14688	Eve2	LXEJ02002227	352363	359980	-	100	77.77
NM_001160017.1	14688	Eve2	LXEJ02005276	7706	59590	-	95.31	24.32
NM_172485.3	210417	Eve2	LXEJ02006413	3445	95667	-	100	24.12
NM_172485.3	210417	Eve2	LXEJ02005207	155122	532176	+	99.6	48.73
NM_172485.3	210417	Eve2	LXEJ02000841	420940	421237	+	100	4.74
NM_172485.3	210417	Eve2	LXEJ02005884	156	14523	+	99.38	20.77
NM_001018019.2	433899	Eve2	LXEJ02004817	111890	112344	+	100	41.78
NM_001018019.2	433899	Eve2	LXEJ02008010	12968	23539	+	100	34.92
NM_001018019.2	433899	Eve2	LXEJ02006489	5107	30340	+	93.93	29.75
NM_144881.4	226861	Eve2	LXEJ02005471	1039298	1218033	+	100	54.42
NM_144881.4	226861	Eve2	LXEJ02002754	19723	59979	+	99.92	45.71
NM_001029977.3	214403	Eve2	LXEJ02000957	18496	68198	+	100	80.74
NM_001029977.3	214403	Eve2	LXEJ02002521	23274	27336	-	100	19.25
NM_001160303.1	214403	Eve2	LXEJ02000957	18496	68198	+	100	80.72
NM_001160303.1	214403	Eve2	LXEJ02002521	23274	27336	-	100	19.27
NM_001160304.1	214403	Eve2	LXEJ02000957	18496	67425	+	100	79.48
NM_001160304.1	214403	Eve2	LXEJ02002521	23274	27339	-	99.82	20.62
NM_001160403.1	331461	Eve2	LXEJ02005941	37781	78384	+	100	47.93
NM_001160403.1	331461	Eve2	LXEJ02008746	150513	1262902	-	99.7	49.32
NM_013881.4	29869	Eve2	LXEJ02007240	91365	123978	-	99.9	71.42
NM_013881.4	29869	Eve2	LXEJ02008848	2749916	2792287	+	100	28.79
NM_172575.3	246196	Eve2	LXEJ02003282	5322	57174	+	99.6	72.24
NM_172575.3	246196	Eve2	LXEJ02009295	691335	758619	+	99.85	29.09
NM_178845.3	246196	Eve2	LXEJ02003282	8055	57174	+	100	84.24
NM_178845.3	246196	Eve2	LXEJ02009295	691335	758619	+	99.7	16.18
NM_007977.2	14069	Eve2	LXEJ02009686	12670	98605	-	99.97	65.2
NM_007977.2	14069	Eve2	LXEJ02005015	336177	399713	+	100	30.74
NM_007977.2	14069	Eve2	LXEJ02005259	212672	212969	-	100	3.96
NM_001161373.1	14069	Eve2	LXEJ02009686	12670	90685	-	99.97	64.2
NM_001161373.1	14069	Eve2	LXEJ02005015	336177	399714	+	100	31.64
NM_001161373.1	14069	Eve2	LXEJ02005259	212672	212969	-	100	4.08
NM_001161374.1	14069	Eve2	LXEJ02009686	12678	90685	-	100	64.15
NM_001161374.1	14069	Eve2	LXEJ02005015	336177	399714	+	100	31.67
NM_001161374.1	14069	Eve2	LXEJ02005259	212672	212969	-	100	4.08
NM_001161413.1	17254	Eve2	LXEJ02011796	170781	177655	-	99.95	86.38
NM_001161413.1	17254	Eve2	LXEJ02006816	586	981	-	98.99	14.07
NM_199024.2	319211	Eve2	LXEJ02010254	42351	44226	-	100	37.3
NM_199024.2	319211	Eve2	LXEJ02010151	54300	213791	-	99.52	53.68
NM_199024.2	319211	Eve2	LXEJ02006603	34792	74520	-	100	10.12
NM_001161483.1	319211	Eve2	LXEJ02010151	54300	195693	-	99.69	84.13
NM_001161483.1	319211	Eve2	LXEJ02006603	34792	74527	-	99.8	14.56
NM_001004141.2	100066	Eve2	LXEJ02001887	1725	43148	-	99.77	67.24
NM_001004141.2	100066	Eve2	LXEJ02001083	3170	6426	+	99.06	33.07
NM_153402.2	214150	Eve2	LXEJ02009967	46140	69288	-	100	78.23
NM_153402.2	214150	Eve2	LXEJ02012152	39762	105679	+	100	24.19
NM_011217.2	19279	Eve2	LXEJ02009296	2337190	2563994	-	99.96	87.16
NM_011217.2	19279	Eve2	LXEJ02002832	6916	7367	-	100	13.04
NM_174868.4	215708	Eve2	LXEJ02004180	90	50558	+	100	85.24
NM_174868.4	215708	Eve2	LXEJ02005966	192763	199694	+	99.74	14.86
NM_001162375.1	215708	Eve2	LXEJ02004180	90	50558	+	100	84.69
NM_001162375.1	215708	Eve2	LXEJ02005966	192763	199694	+	99.74	15.41
NM_015769.2	50505	Eve2	LXEJ02009993	25887	47765	-	100	78.97
NM_015769.2	50505	Eve2	LXEJ02003676	1	20885	-	99.94	28.36
NM_027150.1	69642	Eve2	LXEJ02002844	897114	1080208	+	100	74.67
NM_027150.1	69642	Eve2	LXEJ02010149	2812974	2813293	-	98.45	26.14
NM_134123.3	106583	Eve2	LXEJ02012340	4747	86581	-	99.75	58.36
NM_134123.3	106583	Eve2	LXEJ02008945	3820514	3829209	-	99.81	54.56
NM_001162864.1	106763	Eve2	LXEJ02008388	869506	904564	-	100	87.35
NM_001162864.1	106763	Eve2	LXEJ02004379	857299	860827	+	99.75	5.97
NM_010084.2	13524	Eve2	LXEJ02009636	510463	561702	+	100	76.06
NM_010084.2	13524	Eve2	LXEJ02011232	885	10302	-	99.82	24.22
NM_175252.4	77117	Eve2	LXEJ02003136	19666	23416	-	100	85.02
NM_175252.4	77117	Eve2	LXEJ02010362	542	24137	-	99.68	15.07
NM_010003.2	13098	Eve2	LXEJ02010260	38079	69872	-	99.92	71.45
NM_010003.2	13098	Eve2	LXEJ02001841	45830	48658	+	100	28.59
NM_177855.3	329650	Eve2	LXEJ02001761	1197896	1466929	-	100	57.17
NM_177855.3	329650	Eve2	LXEJ02006822	11284	33693	+	100	41.8
NM_001162956.1	76138	Eve2	LXEJ02004830	357710	421849	+	100	71.81
NM_001162956.1	76138	Eve2	LXEJ02011825	144345	147000	-	100	28.18
NM_026910.1	665113	Eve2	LXEJ02002649	199724	337419	-	100	89.66
NM_026910.1	665113	Eve2	LXEJ02009293	11998	254741	-	100	10.28
NM_001163007.1	665113	Eve2	LXEJ02002649	199724	337419	-	100	89.63
NM_001163007.1	665113	Eve2	LXEJ02009293	11998	254741	-	100	10.32
NM_001163008.1	665113	Eve2	LXEJ02002649	199724	337419	-	100	89.5
NM_001163008.1	665113	Eve2	LXEJ02009293	11998	254741	-	100	10.44
NM_001163009.1	665113	Eve2	LXEJ02002649	203859	337419	-	100	84.1
NM_001163009.1	665113	Eve2	LXEJ02009293	11998	254741	-	100	15.89
NM_008067.4	14396	Eve2	LXEJ02006143	28774	107469	-	100	85.64
NM_008067.4	14396	Eve2	LXEJ02010165	20520	33318	+	99.02	8.23
NM_021302.3	57740	Eve2	LXEJ02005012	1147221	1218637	+	99.43	64.91
NM_021302.3	57740	Eve2	LXEJ02007498	1826	3527	+	99.38	36.87
NM_001162540.1	57740	Eve2	LXEJ02005012	1122393	1218637	+	99.28	59.32
NM_001162540.1	57740	Eve2	LXEJ02007498	1826	3527	+	99.38	42.75
NM_010248.2	14389	Eve2	LXEJ02000006	35390	72545	+	100	92.47
NM_010248.2	14389	Eve2	LXEJ02004363	76994	77294	+	100	5
NM_001162477.1	14389	Eve2	LXEJ02000006	35390	72545	+	100	92.47
NM_001162477.1	14389	Eve2	LXEJ02004363	76994	77294	+	100	5.01
NM_172146.2	231327	Eve2	LXEJ02007439	2412439	2431335	-	99.73	85.35
NM_172146.2	231327	Eve2	LXEJ02011802	2141703	2142324	+	100	15.51
NM_026135.1	383348	Eve2	LXEJ02006835	76766	77298	-	100	39.04
NM_026135.1	383348	Eve2	LXEJ02000828	1618427	1625008	-	99.07	63.36
NM_001163026.1	235567	Eve2	LXEJ02011492	6775	76678	+	100	79.29
NM_001163026.1	235567	Eve2	LXEJ02006727	1098759	1133267	+	100	20.73
NM_001163126.1	238123	Eve2	LXEJ02005090	484928	737089	-	100	85.45
NM_001163126.1	238123	Eve2	LXEJ02004968	4829	20349	-	99.77	14.74
NM_025992.2	67138	Eve2	LXEJ02001386	1151914	1218619	+	99.97	91.02
NM_025992.2	67138	Eve2	LXEJ02003607	399	2745	-	99.5	7.72
NM_028052.4	72003	Eve2	LXEJ02011859	28333	150298	-	99.82	88.98
NM_028052.4	72003	Eve2	LXEJ02003277	121930	147032	-	94.45	15.24
NM_153395.2	67074	Eve2	LXEJ02009443	11350	78484	+	100	92.95
NM_153395.2	67074	Eve2	LXEJ02007632	42050	42704	-	100	7.05
NM_001163024.1	67074	Eve2	LXEJ02009443	11350	78484	+	100	92.96
NM_001163024.1	67074	Eve2	LXEJ02007632	42050	42704	-	100	7.04
NM_001163025.1	67074	Eve2	LXEJ02009443	11350	78484	+	100	92.95
NM_001163025.1	67074	Eve2	LXEJ02007632	42050	42704	-	100	7.05
NM_007736.4	12830	Eve2	LXEJ02001033	7222	124646	+	100	93.36
NM_007736.4	12830	Eve2	LXEJ02009875	321533	404986	+	100	6.64
NM_001163155.1	12830	Eve2	LXEJ02001033	7222	124646	+	100	90.89
NM_001163155.1	12830	Eve2	LXEJ02009875	321533	404986	+	100	9.11
NM_027943.1	71830	Eve2	LXEJ02009277	4727	19867	+	100	70.4
NM_027943.1	71830	Eve2	LXEJ02007234	142466	151080	+	99.53	29.82
NM_009705.3	11847	Eve2	LXEJ02005034	594	25059	+	100	86.66
NM_009705.3	11847	Eve2	LXEJ02002835	846661	847786	-	100	18.84
NM_173748.4	209586	Eve2	LXEJ02005467	258	45182	+	100	79.08
NM_173748.4	209586	Eve2	LXEJ02004938	9359	59337	-	98.59	25.04
NM_028759.1	74106	Eve2	LXEJ02004208	296091	366456	-	100	72.05
NM_028759.1	74106	Eve2	LXEJ02000407	5211	45561	-	100	23.86
NM_178631.4	76897	Eve2	LXEJ02000903	579435	721997	-	100	73.75
NM_178631.4	76897	Eve2	LXEJ02010147	162731	495585	-	96.59	31.24
NM_001163328.1	76897	Eve2	LXEJ02000903	579435	737096	-	99.37	78.85
NM_001163328.1	76897	Eve2	LXEJ02010147	162731	495585	-	96.13	28.6
NM_030699.2	80883	Eve2	LXEJ02008984	23967	32176	-	100	25.09
NM_030699.2	80883	Eve2	LXEJ02001769	1811768	1966931	-	99.85	75.2
NM_133488.1	80883	Eve2	LXEJ02008984	23967	32176	-	100	26.26
NM_133488.1	80883	Eve2	LXEJ02001769	1811768	1966931	-	99.84	74.05
NM_001163348.1	80883	Eve2	LXEJ02008984	23967	32176	-	100	25.91
NM_001163348.1	80883	Eve2	LXEJ02001769	1811768	1966931	-	99.84	74.39
NM_001163349.1	80883	Eve2	LXEJ02008984	23967	32176	-	100	26.6
NM_001163349.1	80883	Eve2	LXEJ02001769	1811768	1966931	-	99.83	73.71
NM_001163350.1	80883	Eve2	LXEJ02008984	23967	32176	-	100	25.95
NM_001163350.1	80883	Eve2	LXEJ02001769	1811768	1966931	-	99.84	74.35
NM_001163351.1	80883	Eve2	LXEJ02008984	23967	32176	-	100	61.27
NM_001163351.1	80883	Eve2	LXEJ02001769	1883474	1966931	-	99.3	39.45
NM_010004.2	13099	Eve2	LXEJ02002225	14366	24730	+	100	50.3
NM_010004.2	13099	Eve2	LXEJ02002621	14988	28063	+	99.78	26.28
NM_010004.2	13099	Eve2	LXEJ02000128	9884	10311	+	99.06	23.76
NM_138666.3	192167	Eve2	LXEJ02000169	38491	46727	+	100	64.36
NM_138666.3	192167	Eve2	LXEJ02003451	61442	484683	+	100	35.66
NM_001163387.1	192167	Eve2	LXEJ02000169	38491	46727	+	100	78.14
NM_001163387.1	192167	Eve2	LXEJ02003451	240033	484683	+	100	21.89
NM_001163394.1	14026	Eve2	LXEJ02005084	80795	121002	+	100	77.47
NM_001163394.1	14026	Eve2	LXEJ02009448	1776705	1777198	+	100	22.43
NM_007965.3	14026	Eve2	LXEJ02005084	80795	121002	+	100	76.8
NM_007965.3	14026	Eve2	LXEJ02009448	1776705	1777198	+	100	23.09
NM_008677.2	17972	Eve2	LXEJ02004958	2889264	2891220	-	100	40.02
NM_008677.2	17972	Eve2	LXEJ02005175	1584	12814	-	99.21	60.49
NM_138312.1	68675	Eve2	LXEJ02002901	26239	28975	+	99.89	68.06
NM_138312.1	68675	Eve2	LXEJ02009835	2766	36962	+	100	7.13
NM_138312.1	68675	Eve2	LXEJ02007071	4788	81156	+	94.55	10.8
NM_001163419.1	68675	Eve2	LXEJ02002901	26239	28975	+	99.89	70.23
NM_001163419.1	68675	Eve2	LXEJ02007071	4788	81156	+	94.55	11.14
NM_001163420.1	68675	Eve2	LXEJ02002901	26239	28975	+	99.89	73.87
NM_001163420.1	68675	Eve2	LXEJ02007071	4788	81156	+	94.55	11.72
NM_001163378.1	76967	Eve2	LXEJ02004264	42635	100272	+	99.98	89.2
NM_001163378.1	76967	Eve2	LXEJ02010347	747907	775170	+	100	10.86
NM_029818.1	76967	Eve2	LXEJ02004264	42635	100271	+	99.98	93.47
NM_029818.1	76967	Eve2	LXEJ02010347	774808	775170	+	100	6.6
NM_144844.2	110821	Eve2	LXEJ02005332	10499	110141	+	99.91	44.33
NM_144844.2	110821	Eve2	LXEJ02011998	42362	119110	+	100	28.08
NM_144844.2	110821	Eve2	LXEJ02007777	16215	66994	+	99.79	19.13
NM_172015.3	105148	Eve2	LXEJ02006169	1138080	1179027	+	99.96	61.41
NM_172015.3	105148	Eve2	LXEJ02006632	140593	150244	-	100	38.69
NM_028434.3	73090	Eve2	LXEJ02005778	11545	17388	-	99.82	67.17
NM_028434.3	73090	Eve2	LXEJ02009842	7649	13676	-	97.76	35.49
NM_025434.3	66230	Eve2	LXEJ02002885	33667	33935	+	100	37.25
NM_025434.3	66230	Eve2	LXEJ02009940	16140	16411	-	100	36.85
NM_025434.3	66230	Eve2	LXEJ02006201	4427	4609	+	100	24.79
NM_025489.3	66326	Eve2	LXEJ02002252	39377	39696	-	100	33.93
NM_025489.3	66326	Eve2	LXEJ02009667	39580	110102	+	99.84	66.31
NM_001163536.1	66326	Eve2	LXEJ02002252	39377	39696	-	100	34.18
NM_001163536.1	66326	Eve2	LXEJ02009667	39580	110102	+	99.83	66.06
NM_001163537.1	66326	Eve2	LXEJ02002252	39377	39696	-	100	33.47
NM_001163537.1	66326	Eve2	LXEJ02009667	62232	110102	+	99.84	66.77
NM_016885.2	59308	Eve2	LXEJ02007813	9073	23419	+	100	61.53
NM_016885.2	59308	Eve2	LXEJ02004923	1889663	1955340	-	98.45	40.76
NM_001163522.1	59308	Eve2	LXEJ02007813	9071	23419	+	100	60.02
NM_001163522.1	59308	Eve2	LXEJ02004923	1892403	1955340	-	100	39.7
NM_029298.1	75467	Eve2	LXEJ02007092	4966	21477	-	100	70.83
NM_029298.1	75467	Eve2	LXEJ02002738	315450	321144	-	100	29.16
NM_146122.3	227801	Eve2	LXEJ02005133	12724	235246	+	100	82.49
NM_146122.3	227801	Eve2	LXEJ02005464	964859	1125707	+	99.82	12.86
NM_172777.3	236573	Eve2	LXEJ02011286	1944	8716	+	100	79.98
NM_172777.3	236573	Eve2	LXEJ02003143	1782	18000	-	99.86	20.25
NM_028243.3	72461	Eve2	LXEJ02004257	41199	58109	-	100	77.29
NM_028243.3	72461	Eve2	LXEJ02003331	81661	116721	+	100	22.7
NM_172869.4	242506	Eve2	LXEJ02001952	1253633	1369487	+	100	92.1
NM_172869.4	242506	Eve2	LXEJ02004631	25199	44117	-	98.41	9.52
NM_001163732.1	242506	Eve2	LXEJ02001952	1253633	1381774	+	100	84.63
NM_001163732.1	242506	Eve2	LXEJ02004631	11541	44117	-	97.8	17.71
NM_175510.3	329178	Eve2	LXEJ02010146	547368	577419	-	99.98	42.31
NM_175510.3	329178	Eve2	LXEJ02006594	8243	72649	-	100	29.28
NM_175510.3	329178	Eve2	LXEJ02006725	5649	48127	-	100	17.29
NM_175510.3	329178	Eve2	LXEJ02008038	11560	31836	-	100	5.91
NM_175510.3	329178	Eve2	LXEJ02007062	13184	22582	-	100	5.26
NM_030110.1	78506	Eve2	LXEJ02010693	12812	23579	+	100	70.53
NM_030110.1	78506	Eve2	LXEJ02007811	58347	116538	+	99.89	29.43
NM_172461.3	208583	Eve2	LXEJ02006727	14718	175501	+	99.85	78.62
NM_172461.3	208583	Eve2	LXEJ02012241	8496	55948	-	90.05	26.09
NM_172805.3	238271	Eve2	LXEJ02003635	32144	244512	-	99.75	69.73
NM_172805.3	238271	Eve2	LXEJ02008532	30596	31834	+	100	30.5
NM_015794.1	50758	Eve2	LXEJ02007631	42214	381269	+	99.98	87.81
NM_015794.1	50758	Eve2	LXEJ02009514	14121	73393	-	98.25	13.41
NM_007963.2	14013	Eve2	LXEJ02009662	4145	32834	+	100	67.93
NM_007963.2	14013	Eve2	LXEJ02004605	3162	31190	-	100	32.06
NM_001164041.1	17129	Eve2	LXEJ02007031	4124	23094	+	99.83	92.78
NM_001164041.1	17129	Eve2	LXEJ02005051	16293	16818	-	100	7.52
NM_008875.4	18805	Eve2	LXEJ02009293	384582	446366	-	99.74	71.47
NM_008875.4	18805	Eve2	LXEJ02008948	976371	1048744	+	99.92	28.85
NM_001164056.1	18805	Eve2	LXEJ02009293	384582	446366	-	99.74	70.68
NM_001164056.1	18805	Eve2	LXEJ02008948	930641	1048744	+	100	29.65
NM_009529.3	22526	Eve2	LXEJ02012108	13610	29166	-	99.84	71.55
NM_009529.3	22526	Eve2	LXEJ02004975	941717	943419	-	100	28.35
NM_001164190.1	17772	Eve2	LXEJ02001594	767249	774846	-	100	52.43
NM_001164190.1	17772	Eve2	LXEJ02008660	16565	87784	+	100	42.31
NM_001164191.1	17772	Eve2	LXEJ02001594	767249	774846	-	100	54.12
NM_001164191.1	17772	Eve2	LXEJ02008660	182	87784	+	100	45.93
NM_019926.3	17772	Eve2	LXEJ02001594	767249	774846	-	100	54.3
NM_019926.3	17772	Eve2	LXEJ02008660	258	87784	+	100	45.75
NM_001164192.1	17772	Eve2	LXEJ02001594	767249	774846	-	100	55.66
NM_001164192.1	17772	Eve2	LXEJ02008660	182	87784	+	100	44.4
NM_027944.1	71831	Eve2	LXEJ02002150	23291	67748	-	100	14.13
NM_027944.1	71831	Eve2	LXEJ02006928	83101	640602	+	98.08	66.04
NM_001164235.1	71831	Eve2	LXEJ02002150	23291	67748	-	100	13.36
NM_001164235.1	71831	Eve2	LXEJ02006928	83101	640602	+	98.23	67.9
NM_183310.2	232035	Eve2	LXEJ02002872	46911	49991	+	100	54.49
NM_183310.2	232035	Eve2	LXEJ02008958	3050241	3705556	-	100	44.76
NM_001164316.1	232035	Eve2	LXEJ02002872	46911	49991	+	100	54.99
NM_001164316.1	232035	Eve2	LXEJ02008958	3050241	3705556	-	100	44.25
NM_001004194.2	446099	Eve2	LXEJ02000576	9997	36101	+	99.72	42.9
NM_001004194.2	446099	Eve2	LXEJ02009361	11158	16654	+	99.62	47.84
NM_001004194.2	446099	Eve2	LXEJ02000558	17477	17858	+	97.38	11.17
NM_028687.1	73936	Eve2	LXEJ02010347	1641292	1700635	-	100	79.58
NM_028687.1	73936	Eve2	LXEJ02005208	177198	187171	+	100	20.41
NM_146241.2	237553	Eve2	LXEJ02005220	10031	129400	+	99.97	71.05
NM_146241.2	237553	Eve2	LXEJ02002832	1261602	1474532	+	100	26.61
NM_144785.2	207151	Eve2	LXEJ02000172	633	30083	-	100	76.2
NM_144785.2	207151	Eve2	LXEJ02005190	6309	7682	+	100	23.94
NM_023821.3	76469	Eve2	LXEJ02005149	424801	482512	-	100	96.9
NM_023821.3	76469	Eve2	LXEJ02004118	17343	37342	-	97.57	3.44
NM_172143.2	218165	Eve2	LXEJ02012154	5369	233019	-	99.6	88.74
NM_172143.2	218165	Eve2	LXEJ02000016	35863	49484	+	100	13.63
NM_177612.3	216033	Eve2	LXEJ02011430	43247	828580	+	99.95	68.96
NM_177612.3	216033	Eve2	LXEJ02008152	211511	670756	+	96.68	19.92
NM_177612.3	216033	Eve2	LXEJ02009903	85164	129758	-	94.49	14.63
NM_001164376.1	216033	Eve2	LXEJ02011430	43247	828580	+	99.95	67.61
NM_001164376.1	216033	Eve2	LXEJ02000400	3278	49913	-	100	7.06
NM_001164376.1	216033	Eve2	LXEJ02008152	607522	670756	+	96.4	15.72
NM_001164376.1	216033	Eve2	LXEJ02009903	85164	129758	-	94.49	14.34
NM_001164519.1	216033	Eve2	LXEJ02011430	33771	828580	+	99.92	88.02
NM_001164519.1	216033	Eve2	LXEJ02008152	608358	670756	+	95.6	16.65
NM_023729.3	74068	Eve2	LXEJ02003517	54170	91265	+	100	62.06
NM_023729.3	74068	Eve2	LXEJ02003797	537601	542181	+	99.84	38.16
NM_001164593.1	239618	Eve2	LXEJ02001639	10107	38359	+	100	68.42
NM_001164593.1	239618	Eve2	LXEJ02007991	2525076	2839922	+	98.18	34.52
NM_001164594.1	239618	Eve2	LXEJ02001639	10107	38359	+	100	79.78
NM_001164594.1	239618	Eve2	LXEJ02007991	2725346	2839922	+	96.92	23.66
NM_175650.4	268878	Eve2	LXEJ02001509	47275	153833	+	99.78	60.5
NM_175650.4	268878	Eve2	LXEJ02012525	747978	783116	-	100	39.22
NM_001164612.1	224079	Eve2	LXEJ02009971	28488	66097	+	100	35.58
NM_001164612.1	224079	Eve2	LXEJ02001509	3252	29974	+	99.66	43.68
NM_001164612.1	224079	Eve2	LXEJ02003528	7899	15588	+	96.88	12.15
NM_001164613.1	224079	Eve2	LXEJ02009971	28488	66097	+	100	50.43
NM_001164613.1	224079	Eve2	LXEJ02001509	3252	5281	+	98.83	17.9
NM_001164613.1	224079	Eve2	LXEJ02007629	3673128	3676752	+	99.66	10.23
NM_001164613.1	224079	Eve2	LXEJ02003528	7899	15588	+	96.88	17.22
NM_133821.3	98432	Eve2	LXEJ02007816	17721	93103	-	99.97	68.95
NM_133821.3	98432	Eve2	LXEJ02005377	54028	169268	+	100	31.09
NM_001164628.1	73167	Eve2	LXEJ02003640	1517531	1543637	+	100	32.71
NM_001164628.1	73167	Eve2	LXEJ02003346	8395	19303	+	98.44	33.77
NM_001164627.1	73167	Eve2	LXEJ02003640	1517531	1543637	+	100	33.07
NM_001164627.1	73167	Eve2	LXEJ02003346	8395	19303	+	98.44	33.59
NM_013666.2	225742	Eve2	LXEJ02010483	3695	17038	+	100	72.42
NM_013666.2	225742	Eve2	LXEJ02007338	98334	145322	+	100	27.48
NM_153124.2	225742	Eve2	LXEJ02010483	3695	17038	+	100	76.34
NM_153124.2	225742	Eve2	LXEJ02007338	98334	145322	+	100	23.57
NM_180662.2	76510	Eve2	LXEJ02005154	468112	835680	+	100	78.42
NM_180662.2	76510	Eve2	LXEJ02002897	57244	93356	+	97.46	22.33
NM_029640.2	76510	Eve2	LXEJ02005154	473504	835680	+	100	73.58
NM_029640.2	76510	Eve2	LXEJ02002897	92136	93356	+	100	23.25
NM_001164669.1	330355	Eve2	LXEJ02009481	1	108796	-	100	55.17
NM_001164669.1	330355	Eve2	LXEJ02007996	3431	89110	+	100	44.83
NM_001033379.3	319618	Eve2	LXEJ02005127	907991	914837	-	100	79.37
NM_001033379.3	319618	Eve2	LXEJ02008153	974396	1005777	+	97.77	21.59
NM_001164677.1	18571	Eve2	LXEJ02006887	1102	11877	+	100	69.72
NM_001164677.1	18571	Eve2	LXEJ02005307	1767038	1796990	+	100	22.55
NM_001164678.1	18571	Eve2	LXEJ02006887	1102	11877	+	100	69.94
NM_001164678.1	18571	Eve2	LXEJ02005307	1767038	1796990	+	100	22.32
NM_011052.2	18571	Eve2	LXEJ02006887	1102	11877	+	100	69.9
NM_011052.2	18571	Eve2	LXEJ02005307	1767038	1796990	+	100	22.36
NM_009027.3	19418	Eve2	LXEJ02011049	28851	68374	+	99.98	66.5
NM_009027.3	19418	Eve2	LXEJ02011254	645541	801688	-	100	33.65
NM_001164805.1	330267	Eve2	LXEJ02000653	27709	81194	-	99.93	69.96
NM_001164805.1	330267	Eve2	LXEJ02010648	11945	136591	-	100	18.57
NM_001164805.1	330267	Eve2	LXEJ02003648	25091	25924	-	99.88	7.56
NM_001164805.1	330267	Eve2	LXEJ02008045	69669	70134	-	99.35	4.22
NM_001164785.1	223838	Eve2	LXEJ02010171	20212	62482	-	100	84.01
NM_001164785.1	223838	Eve2	LXEJ02012465	1069	25691	-	100	15.99
NM_001164786.1	223838	Eve2	LXEJ02010171	51312	62482	-	100	43.17
NM_001164786.1	223838	Eve2	LXEJ02012465	1069	25691	-	100	56.92
NM_028950.4	74455	Eve2	LXEJ02002749	1421812	1440040	-	100	62.75
NM_028950.4	74455	Eve2	LXEJ02007389	69882	89174	+	100	37.35
NM_001165941.1	74455	Eve2	LXEJ02002749	1421812	1440040	-	100	60.42
NM_001165941.1	74455	Eve2	LXEJ02007389	64322	89174	+	100	39.67
NM_001165943.1	74455	Eve2	LXEJ02002749	1421812	1440040	-	100	66.93
NM_001165943.1	74455	Eve2	LXEJ02007389	64322	89174	+	100	33.17
NM_001165999.1	242384	Eve2	LXEJ02001137	34868	70469	+	99.85	73.41
NM_001165999.1	242384	Eve2	LXEJ02006533	1646360	2184625	+	98.4	17.55
NM_001165999.1	242384	Eve2	LXEJ02006029	24494	235173	-	96.6	6.87
NM_001166000.1	242384	Eve2	LXEJ02001137	67100	70469	+	100	82.17
NM_001166000.1	242384	Eve2	LXEJ02006029	24494	235170	-	97.22	8.7
NM_001166027.1	230623	Eve2	LXEJ02005793	12928	13410	-	100	34.67
NM_001166027.1	230623	Eve2	LXEJ02007887	8202	19986	+	98.52	29.14
NM_001166207.1	320752	Eve2	LXEJ02002388	24693	54713	-	100	49.05
NM_001166207.1	320752	Eve2	LXEJ02009802	730025	809577	+	99.6	51.84
NM_138654.3	192136	Eve2	LXEJ02011613	50572	100556	-	100	29.64
NM_138654.3	192136	Eve2	LXEJ02003407	6734	81364	+	98.33	17.31
NM_138654.3	192136	Eve2	LXEJ02003810	164225	314416	+	97.91	38.21
NM_001163288.2	634731	Eve2	LXEJ02009104	532342	621152	+	100	63.06
NM_001163288.2	634731	Eve2	LXEJ02007287	903750	922103	-	100	37.02
NM_172613.4	224079	Eve2	LXEJ02009971	28488	66097	+	100	34.68
NM_172613.4	224079	Eve2	LXEJ02001509	3252	29974	+	99.66	44.29
NM_172613.4	224079	Eve2	LXEJ02003528	7899	15588	+	96.88	12.32
NM_175188.4	72925	Eve2	LXEJ02009873	1406335	1617410	+	99.97	88.15
NM_175188.4	72925	Eve2	LXEJ02010621	43564	131486	+	98.97	6.6
NM_029131.3	74954	Eve2	LXEJ02008219	4725	5522	+	100	61.9
NM_029131.3	74954	Eve2	LXEJ02012238	8296	9385	-	97.79	28.08
NM_053123.4	93761	Eve2	LXEJ02006244	8118	60132	+	100	67.07
NM_053123.4	93761	Eve2	LXEJ02008539	1408216	1426826	+	100	32.97
NM_031388.2	83563	Eve2	LXEJ02010381	17385	28663	+	100	87.05
NM_031388.2	83563	Eve2	LXEJ02008103	125617	129922	+	99.79	11.61
NM_181347.3	329260	Eve2	LXEJ02001966	563	54079	+	99.73	87.36
NM_181347.3	329260	Eve2	LXEJ02011799	98335	232675	+	100	12.56
NM_001166501.1	329260	Eve2	LXEJ02001966	563	54079	+	99.73	85.93
NM_001166501.1	329260	Eve2	LXEJ02011799	94323	232675	+	100	13.98
NM_147218.2	76184	Eve2	LXEJ02004097	4243312	4268625	+	99.54	33.43
NM_147218.2	76184	Eve2	LXEJ02004789	157266	200662	-	99.97	67.42
NM_001113246.2	108699	Eve2	LXEJ02005036	33474	144248	+	100	92
NM_001113246.2	108699	Eve2	LXEJ02005037	18194	18521	-	99.39	8.07
NM_001166603.1	108699	Eve2	LXEJ02005036	33474	144248	+	100	91.64
NM_001166603.1	108699	Eve2	LXEJ02005037	18194	18521	-	99.39	8.43
NM_134248.2	171283	Eve2	LXEJ02005299	1412131	1421218	+	100	66.96
NM_134248.2	171283	Eve2	LXEJ02004160	7590	9064	-	100	20.79
NM_001166631.1	171283	Eve2	LXEJ02005299	1412126	1421218	+	99.92	64.11
NM_001166631.1	171283	Eve2	LXEJ02004160	3945	9721	-	100	35.83
NM_001166632.1	171283	Eve2	LXEJ02005299	1412128	1421218	+	100	67.98
NM_001166632.1	171283	Eve2	LXEJ02004160	3945	20005	-	100	31.88
NM_175358.4	108672	Eve2	LXEJ02008381	1199859	1261074	-	100	92.23
NM_175358.4	108672	Eve2	LXEJ02008050	31634	32034	-	100	7.26
NM_008892.2	18968	Eve2	LXEJ02008549	3765175	4021907	-	99.67	80.89
NM_008892.2	18968	Eve2	LXEJ02008499	129742	161698	-	97.73	22.25
NM_025351.3	66098	Eve2	LXEJ02008701	14172	65376	-	99.25	59.23
NM_025351.3	66098	Eve2	LXEJ02008328	707845	792207	-	100	43.87
NM_001167736.1	66098	Eve2	LXEJ02008701	37311	65376	-	100	60.65
NM_001167736.1	66098	Eve2	LXEJ02008328	707845	766016	-	95.81	52.2
NM_021385.2	58186	Eve2	LXEJ02009216	5871	35852	+	100	56.91
NM_021385.2	58186	Eve2	LXEJ02004949	1803474	1834815	+	100	43.24
NM_001167730.1	58186	Eve2	LXEJ02009216	5869	35852	+	100	56.34
NM_001167730.1	58186	Eve2	LXEJ02004949	1803474	1835997	+	100	43.87
NM_029412.1	75740	Eve2	LXEJ02001111	34795	148909	-	99.14	73.94
NM_029412.1	75740	Eve2	LXEJ02012431	72210	72572	+	100	13.49
NM_029412.1	75740	Eve2	LXEJ02002552	162399	167658	-	99.43	13.19
NM_001167748.1	75740	Eve2	LXEJ02001111	34795	148909	-	99.02	69.27
NM_001167748.1	75740	Eve2	LXEJ02012431	72210	72572	+	100	14.41
NM_001167748.1	75740	Eve2	LXEJ02002552	162401	167658	-	99.71	14.01
NM_024260.5	73288	Eve2	LXEJ02001908	36401	51926	-	100	44.21
NM_024260.5	73288	Eve2	LXEJ02009807	200556	257618	+	99.66	39.52
NM_001167750.1	73288	Eve2	LXEJ02001908	36401	51926	-	100	58.43
NM_001167750.1	73288	Eve2	LXEJ02009807	200556	257618	+	99.66	29.45
NM_001167751.1	73288	Eve2	LXEJ02001908	38822	51926	-	100	43.02
NM_001167751.1	73288	Eve2	LXEJ02009807	200556	257618	+	99.66	40.4
NM_029335.3	75556	Eve2	LXEJ02005157	6088	11015	+	100	60.2
NM_029335.3	75556	Eve2	LXEJ02010708	3488	6698	-	99.8	39.54
NM_001167777.1	211961	Eve2	LXEJ02002528	31067	108962	-	100	93.92
NM_001167777.1	211961	Eve2	LXEJ02009154	40932	130530	+	99.58	6.17
NM_001167876.1	242627	Eve2	LXEJ02000649	3672	100296	-	100	32.97
NM_001167876.1	242627	Eve2	LXEJ02002201	6247	19034	+	100	12.49
NM_001167876.1	242627	Eve2	LXEJ02012316	2171	58129	-	99.45	12.23
NM_001167876.1	242627	Eve2	LXEJ02009392	9114	41596	+	94.47	7.82
NM_001167878.1	242627	Eve2	LXEJ02000649	3672	100296	-	100	33.44
NM_001167878.1	242627	Eve2	LXEJ02002201	6247	19034	+	100	12.67
NM_001167878.1	242627	Eve2	LXEJ02012316	2171	58129	-	99.38	10.98
NM_001167878.1	242627	Eve2	LXEJ02009392	9114	41596	+	94.47	7.93
NM_001013820.3	434674	Eve2	LXEJ02003776	26776	36498	-	99.88	42.31
NM_001013820.3	434674	Eve2	LXEJ02008641	11912	27160	-	99.8	51.94
NM_027616.3	70950	Eve2	LXEJ02001389	65073	351950	-	100	65.51
NM_027616.3	70950	Eve2	LXEJ02001552	3315	69172	-	99.91	34.69
NM_031384.2	83558	Eve2	LXEJ02009492	3316	106591	+	99.3	44.03
NM_031384.2	83558	Eve2	LXEJ02003675	8300	21629	+	100	29.53
NM_031384.2	83558	Eve2	LXEJ02006177	652156	692239	+	98.23	22.58
NM_001167997.1	83558	Eve2	LXEJ02009492	3316	103662	+	99.82	65.19
NM_001167997.1	83558	Eve2	LXEJ02006177	652156	679300	+	100	26.45
NM_173447.3	270190	Eve2	LXEJ02007084	1858388	2159701	-	99.95	91.3
NM_173447.3	270190	Eve2	LXEJ02005187	117581	117992	+	100	8.79
NM_001168296.1	270190	Eve2	LXEJ02007084	1858388	2159701	-	99.95	91.06
NM_001168296.1	270190	Eve2	LXEJ02005187	117581	117992	+	100	9.02
NM_172952.3	268566	Eve2	LXEJ02005666	16206	219668	+	99.82	84.82
NM_172952.3	268566	Eve2	LXEJ02010769	8177	119664	-	100	9.88
NM_145965.2	268566	Eve2	LXEJ02005666	16206	219668	+	99.82	84.86
NM_145965.2	268566	Eve2	LXEJ02010769	8177	119664	-	100	9.86
NM_029288.3	100041774	Eve2	LXEJ02009431	8729	18311	+	99.26	68.78
NM_029288.3	100041774	Eve2	LXEJ02007849	1264	1587	+	98.45	32.62
NM_175500.4	103978	Eve2	LXEJ02007636	441560	1131382	-	100	48.49
NM_175500.4	103978	Eve2	LXEJ02011435	9622	10534	+	100	31.64
NM_175500.4	103978	Eve2	LXEJ02002557	18070	18644	-	100	19.93
NM_183111.2	75258	Eve2	LXEJ02007528	37110	44191	+	100	52.65
NM_183111.2	75258	Eve2	LXEJ02012113	105264	105564	-	99.33	38
NM_001168369.1	75453	Eve2	LXEJ02005598	23722	29303	-	100	35.73
NM_001168369.1	75453	Eve2	LXEJ02001832	2846	32029	+	96.46	36.47
NM_029292.3	75453	Eve2	LXEJ02005598	11185	29303	-	100	29.56
NM_029292.3	75453	Eve2	LXEJ02001832	12131	32029	+	100	46.08
NM_001168382.1	75725	Eve2	LXEJ02010700	203504	298361	-	100	45.17
NM_001168382.1	75725	Eve2	LXEJ02011676	2612	43458	-	99.42	56.1
NM_029404.3	75725	Eve2	LXEJ02010700	272605	298361	-	100	75.21
NM_029404.3	75725	Eve2	LXEJ02011676	6545	43458	-	99.89	24.87
NM_001003948.2	98496	Eve2	LXEJ02008430	212443	214663	-	99.95	83.27
NM_001003948.2	98496	Eve2	LXEJ02000119	89617	89921	+	100	11.43
NM_018737.5	55936	Eve2	LXEJ02010713	3779636	3822894	-	99.71	69.55
NM_018737.5	55936	Eve2	LXEJ02011806	18152	73907	-	98.17	32.3
NM_001168568.1	55936	Eve2	LXEJ02010713	3779636	3822894	-	99.71	71.23
NM_001168568.1	55936	Eve2	LXEJ02011806	18152	73942	-	98.03	30.67
NM_001168569.1	55936	Eve2	LXEJ02010713	3779636	3822894	-	99.71	70.49
NM_001168569.1	55936	Eve2	LXEJ02011806	18152	73907	-	98.1	31.38
NM_001168571.1	55936	Eve2	LXEJ02010713	3779636	3823743	-	99.78	68.6
NM_001168571.1	55936	Eve2	LXEJ02011806	18152	73907	-	98.12	33.26
NM_144792.4	208449	Eve2	LXEJ02007966	83904	146071	-	99.49	87.52
NM_144792.4	208449	Eve2	LXEJ02010498	3836560	3977017	+	100	12.47
NM_001168525.1	208449	Eve2	LXEJ02007966	83904	121512	-	100	76.18
NM_001168525.1	208449	Eve2	LXEJ02010498	3875690	3977017	+	100	21.79
NM_025827.3	66887	Eve2	LXEJ02007658	4805	53823	-	100	66
NM_025827.3	66887	Eve2	LXEJ02005131	43955	51660	+	100	32.5
NM_001168591.1	66887	Eve2	LXEJ02007658	4805	26300	-	100	38.84
NM_001168591.1	66887	Eve2	LXEJ02005131	43955	51660	+	100	59.67
NM_010075.2	13483	Eve2	LXEJ02009107	736283	1012583	-	99.94	79.9
NM_010075.2	13483	Eve2	LXEJ02005041	310177	340665	+	94.54	17.87
NM_207282.3	13483	Eve2	LXEJ02009107	736283	1012583	-	99.94	82.39
NM_207282.3	13483	Eve2	LXEJ02005041	542105	549723	+	96.93	14.21
NM_001136060.2	13483	Eve2	LXEJ02009107	736283	1012583	-	99.94	85.8
NM_001136060.2	13483	Eve2	LXEJ02002663	33862	34306	+	98.42	9.75
NM_177267.4	320808	Eve2	LXEJ02004979	20474	89296	+	100	92.72
NM_177267.4	320808	Eve2	LXEJ02004980	915523	915940	+	100	7.32
NM_001034874.3	380702	Eve2	LXEJ02009099	238763	252032	+	99.98	86.99
NM_001034874.3	380702	Eve2	LXEJ02005559	106022	129499	+	99.89	13.12
NM_028296.3	72605	Eve2	LXEJ02001618	33736	56825	+	99.94	58.03
NM_028296.3	72605	Eve2	LXEJ02001954	1477688	1885387	+	99.58	43.48
NM_011999.4	26888	Eve2	LXEJ02005734	99595	104360	-	99.79	77.34
NM_011999.4	26888	Eve2	LXEJ02007317	36559	38329	+	100	18.98
NM_001170332.1	26888	Eve2	LXEJ02005734	99595	104360	-	99.79	79.92
NM_001170332.1	26888	Eve2	LXEJ02007317	35933	38329	+	100	16.28
NM_001170333.1	26888	Eve2	LXEJ02005734	99595	104545	-	100	77.63
NM_001170333.1	26888	Eve2	LXEJ02007317	36559	41296	+	100	22.44
NM_172120.4	218035	Eve2	LXEJ02004428	97384	153762	-	100	85.32
NM_172120.4	218035	Eve2	LXEJ02008996	11620	88647	-	98.96	15.06
NM_001170705.1	100322896	Eve2	LXEJ02009880	1161780	1197921	-	100	82.88
NM_001170705.1	100322896	Eve2	LXEJ02004818	67704	73762	-	99.76	17.27
NM_152923.2	110862	Eve2	LXEJ02002305	29189	65741	+	100	86.48
NM_152923.2	110862	Eve2	LXEJ02005109	174568	174958	+	100	13.58
NM_015823.3	50791	Eve2	LXEJ02005153	565099	881293	-	99.81	82.48
NM_015823.3	50791	Eve2	LXEJ02010702	89177	449714	-	98.39	17.01
NM_001170745.1	50791	Eve2	LXEJ02005153	565098	881293	-	99.81	82.37
NM_001170745.1	50791	Eve2	LXEJ02010702	89177	449714	-	98.39	17.05
NM_001170746.1	50791	Eve2	LXEJ02005153	565099	881293	-	99.81	80.46
NM_001170746.1	50791	Eve2	LXEJ02010702	89177	1162134	-	98.55	19.49
NM_027477.3	272347	Eve2	LXEJ02010493	362281	371606	-	100	81.19
NM_027477.3	272347	Eve2	LXEJ02002251	63839	68827	+	100	18.91
NM_173034.3	272347	Eve2	LXEJ02010493	362281	371604	-	100	91.56
NM_173034.3	272347	Eve2	LXEJ02002251	63839	64100	+	100	8.5
NM_172799.4	237930	Eve2	LXEJ02002884	302	20354	+	100	73.51
NM_172799.4	237930	Eve2	LXEJ02010055	127714	139549	+	100	33.47
NM_028882.4	108151	Eve2	LXEJ02001500	471673	507535	-	100	75.63
NM_028882.4	108151	Eve2	LXEJ02009175	99507	258878	+	100	23.61
NM_001170787.1	244682	Eve2	LXEJ02003285	599944	779649	-	99.82	52.22
NM_001170787.1	244682	Eve2	LXEJ02010340	65865	1048085	+	99.26	47.58
NM_177787.4	277898	Eve2	LXEJ02003995	3296	37809	+	100	53.63
NM_177787.4	277898	Eve2	LXEJ02005861	1017	8081	-	100	22.91
NM_177787.4	277898	Eve2	LXEJ02000719	9978	28913	-	95.74	25.19
NM_001033359.2	244682	Eve2	LXEJ02003285	599944	772605	-	100	60.84
NM_001033359.2	244682	Eve2	LXEJ02010340	65914	1048085	+	98.9	37.93
[truncated: 1,699 more rows]

## Sheet: dropped_at_consolidation
#NCBIGeneID	TranscriptAccession	Assembly
13240	NM_007852.1	GRCm38
18727	NM_011091.1	GRCm38
26421	NM_011954.2	GRCm38
22300	NM_009485.1	GRCm38
53873	NM_017385.1	GRCm38
664726	NM_001039944.2	GRCm38
212427	NM_172505.4	GRCm38
16353	NR_015351.1	GRCm38
18730	NM_011094.1	GRCm38
100034729	NM_001082966.1	Eve2
100038927	NM_001177485.1	Eve2
100038948	NM_001281979.1	Eve2
100038993	NM_001100596.1	Eve2
100039008	NM_001122647.1	Eve2
100039028	NM_001164526.1	Eve2
100039042	NM_001122662.1	Eve2
100039054	NM_001199995.1	Eve2
100039055	NM_001220497.1	Eve2
100039060	NM_001177543.1	Eve2
100039065	NM_001100445.2	Eve2
100039087	NM_001270792.1	Eve2
100039087	NM_001270793.1	Eve2
100039089	NM_001134674.1	Eve2
100039089	NM_001347134.1	Eve2
100039116	NM_001199999.1	Eve2
100039120	NM_001162364.2	Eve2
100039150	NM_001200004.1	Eve2
100039177	NM_001199936.1	Eve2
100039192	NM_001270498.1	Eve2
100039192	NM_001270499.1	Eve2
100039206	NM_001200006.1	Eve2
100039213	NM_001270506.1	Eve2
100039240	NM_001109969.2	Eve2
100039246	NM_001270503.1	Eve2
100039257	NM_001270495.1	Eve2
100039257	NM_001270496.1	Eve2
100039280	NM_001310463.1	Eve2
100039324	NM_001099919.2	Eve2
100039377	NM_001102678.2	Eve2
100039467	NM_001100609.1	Eve2
100039479	NM_001167567.1	Eve2
100039499	NM_001167568.1	Eve2
100039550	NM_001109970.1	Eve2
100039707	NM_001128601.1	Eve2
100039890	NM_001099920.1	Eve2
100039934	NM_001122734.1	Eve2
100039939	NM_001199965.1	Eve2
100039939	NM_001199966.1	Eve2
100039948	NM_001099318.1	Eve2
100040016	NM_001085348.1	Eve2
100040482	NM_001168334.1	Eve2
100040525	NR_028305.2	Eve2
100040563	NM_001166630.1	Eve2
100040599	NM_001177408.1	Eve2
100040606	NM_001099333.3	Eve2
100040722	NM_001282034.1	Eve2
100040732	NM_001145038.1	Eve2
100040854	NM_001113736.1	Eve2
100040861	NM_001113735.1	Eve2
100040867	NM_001166646.1	Eve2
100040880	NR_033117.1	Eve2
100040894	NM_001166601.1	Eve2
100040944	NM_001346707.1	Eve2
100041034	NR_131981.1	Eve2
100041077	NM_001085419.1	Eve2
100041151	NM_001309401.1	Eve2
100041296	NM_001270456.1	Eve2
100041352	NM_001167578.1	Eve2
100041375	NM_001105159.1	Eve2
100041379	NM_001103158.2	Eve2
100041515	NM_001291093.1	Eve2
100041515	NM_001291094.1	Eve2
100041554	NM_001243109.1	Eve2
100041578	NM_001243114.1	Eve2
100041579	NM_001270431.1	Eve2
100041586	NM_001123368.1	Eve2
100041596	NM_001205249.1	Eve2
100041621	NM_001123372.1	Eve2
100041639	NM_001123367.1	Eve2
100041658	NM_001134675.1	Eve2
100041658	NM_001347129.1	Eve2
100041677	NM_001127189.3	Eve2
100041687	NM_001134676.1	Eve2
100041687	NM_001347131.1	Eve2
100041735	NM_001256885.1	Eve2
100041759	NM_001177486.1	Eve2
100041774	NM_029288.3	Eve2
100041787	NM_001177487.1	Eve2
100041890	NM_001177521.1	Eve2
100042109	NM_001099325.2	Eve2
100042144	NM_001100610.2	Eve2
100042149	NM_001024712.2	Eve2
100042159	NM_001243011.1	Eve2
100042168	NM_001243001.1	Eve2
100042254	NM_001099643.2	Eve2
100042275	NM_001243024.1	Eve2
100042295	NM_001243092.1	Eve2
100042342	NM_001098269.2	Eve2
100042555	NM_001099348.1	Eve2
100042591	NM_001105062.1	Eve2
100042636	NM_001105066.1	Eve2
100042690	NM_001270423.1	Eve2
100042761	NM_001163731.1	Eve2
100042848	NM_001105073.1	Eve2
100042856	NM_001243039.1	Eve2
100042856	NM_001243040.1	Eve2
100042927	NM_001242947.1	Eve2
100042939	NM_001242951.1	Eve2
100042946	NM_001242954.1	Eve2
100042964	NM_001167158.1	Eve2
100042966	NR_030707.1	Eve2
100042996	NM_001166837.1	Eve2
100043016	NM_001166839.1	Eve2
100043019	NM_001167165.1	Eve2
100043025	NM_001167167.1	Eve2
100043029	NM_001167169.1	Eve2
100043033	NM_001167149.1	Eve2
100043037	NM_001167573.1	Eve2
100043043	NM_001167159.1	Eve2
100043051	NM_001166840.1	Eve2
100043058	NM_001167160.1	Eve2
100043061	NM_001167162.1	Eve2
100043079	NM_001167164.1	Eve2
100043083	NM_001167166.1	Eve2
100043088	NM_001167168.1	Eve2
100043108	NM_001104525.1	Eve2
100043125	NM_001101657.2	Eve2
100043194	NM_009286.2	Eve2
100043216	NM_001100446.2	Eve2
100043231	NM_001166638.1	Eve2
100043235	NM_001166639.1	Eve2
100043239	NM_001166641.1	Eve2
100043247	NM_001166636.1	Eve2
100043381	NM_001099349.2	Eve2
100043387	NM_001099327.1	Eve2
100043456	NM_001270429.1	Eve2
100043523	NM_001167151.1	Eve2
100043536	NM_001166844.1	Eve2
100043569	NM_001166847.1	Eve2
100043595	NR_033693.1	Eve2
100043614	NM_001166849.1	Eve2
100043684	NM_001160150.1	Eve2
100043686	NM_001160151.1	Eve2
100043688	NM_001160152.1	Eve2
100043856	NM_001310621.1	Eve2
100043915	NM_001256480.1	Eve2
100048884	NM_001199333.1	Eve2
100048885	NM_001134644.1	Eve2
100101806	NM_001100110.1	Eve2
100101807	NM_001100116.1	Eve2
100124627	NR_037258.1	Eve2
100124641	NR_035409.1	Eve2
100124642	NR_037252.1	Eve2
100124649	NR_030647.1	Eve2
100124668	NR_130335.1	Eve2
100135657	NM_001184969.1	Eve2
100189605	NM_001135127.2	Eve2
100303732	NM_001177404.1	Eve2
100303732	NM_001177406.1	Eve2
100303744	NM_001164787.1	Eve2
100312475	NM_001167538.1	Eve2
100417829	NR_040453.1	Eve2
100502896	NM_001277512.1	Eve2
100502924	NM_001256481.2	Eve2
100502967	NM_001281511.1	Eve2
100503353	NM_001199308.1	Eve2
100503949	NM_001242944.1	Eve2
100504239	NM_001193668.1	Eve2
100504263	NM_001305136.1	Eve2
100504263	NM_001305137.1	Eve2
100504263	NR_130971.1	Eve2
100504346	NM_001193666.1	Eve2
100504362	NM_001193667.1	Eve2
100526483	NR_037251.1	Eve2
100526491	NR_037260.1	Eve2
100526539	NR_037267.1	Eve2
100526561	NR_130341.1	Eve2
100861474	NR_046122.1	Eve2
100861475	NR_046123.1	Eve2
100861488	NR_046140.1	Eve2
100861492	NR_046145.1	Eve2
100861493	NR_046146.1	Eve2
100861494	NR_046147.1	Eve2
100861495	NR_046148.1	Eve2
100861496	NR_046149.1	Eve2
100861497	NR_046150.1	Eve2
100861498	NR_046151.1	Eve2
100861499	NR_046152.1	Eve2
100861500	NR_046153.1	Eve2
100861615	NM_001270812.1	Eve2
100861668	NM_001270553.1	Eve2
100861861	NR_073038.1	Eve2
100861966	NM_001270667.1	Eve2
100861978	NM_001267703.1	Eve2
100861978	NM_001267704.1	Eve2
100862015	NM_001277531.1	Eve2
100862126	NM_001270613.1	Eve2
100862247	NM_001270432.1	Eve2
100862329	NM_001270669.1	Eve2
100862359	NM_001281516.1	Eve2
101055863	NM_001277487.1	Eve2
101055864	NM_001324551.1	Eve2
102638913	NM_001347484.1	Eve2
102639598	NM_001305132.1	Eve2
102639598	NM_001305133.1	Eve2
102639598	NR_130970.1	Eve2
104797374	NR_130344.1	Eve2
106029237	NM_001310632.1	Eve2
110558	NM_001201460.1	Eve2
12047	NM_007536.2	Eve2
13087	NM_007812.4	Eve2
13240	NM_007852.1	Eve2
13647	NM_010115.6	Eve2
15019	NM_023124.5	Eve2
15051	NM_010399.2	Eve2
15129	NM_001278161.1	Eve2
18722	NM_011087.1	Eve2
18724	NM_011088.1	Eve2
18727	NM_011091.1	Eve2
18730	NM_011094.1	Eve2
19368	NM_009016.1	Eve2
19369	NM_009017.1	Eve2
22135	NM_009444.1	Eve2
22311	NM_001105063.1	Eve2
246792	NM_145708.2	Eve2
257666	NM_146266.2	Eve2
258382	NM_146384.1	Eve2
26421	NM_011954.2	Eve2
272667	NR_030763.1	Eve2
277668	NM_001126325.1	Eve2
319210	NR_003962.1	Eve2
381598	NR_028428.1	Eve2
381715	NR_073011.1	Eve2
382059	NM_207658.4	Eve2
404288	NM_207618.2	Eve2
404291	NM_207548.2	Eve2
433492	NM_001025574.1	Eve2
434117	NM_001105178.1	Eve2
434794	NM_001081642.1	Eve2
434865	NM_001114383.1	Eve2
434866	NM_001114400.2	Eve2
435953	NM_001166715.1	Eve2
449000	NM_001005358.2	Eve2
449000	NM_001163919.1	Eve2
53873	NM_017385.1	Eve2
53877	NM_001017422.1	Eve2
53880	NM_021545.1	Eve2
545649	NM_001085532.3	Eve2
545651	NM_001098841.3	Eve2
545653	NM_001243166.1	Eve2
545655	NM_001161610.1	Eve2
545728	NM_001310021.1	Eve2
545762	NM_001031622.2	Eve2
545909	NM_001105071.1	Eve2
546185	NR_040410.1	Eve2
546282	NM_001081657.1	Eve2
547127	NR_033520.1	Eve2
574405	NM_001025384.3	Eve2
574438	NM_001045539.2	Eve2
619991	NM_001114754.1	Eve2
620574	NM_001167153.1	Eve2
620758	NM_001166724.1	Eve2
621510	NM_001166725.1	Eve2
621852	NM_001040089.3	Eve2
622474	NM_001039889.3	Eve2
622486	NM_001310703.1	Eve2
622894	NR_044992.1	Eve2
623197	NM_001277575.1	Eve2
623272	NM_001085538.2	Eve2
624512	NM_001105065.2	Eve2
625580	NM_001105152.1	Eve2
625605	NM_001105156.1	Eve2
625650	NM_001243016.1	Eve2
625713	NM_001243017.1	Eve2
626578	NM_001039646.2	Eve2
627081	NM_001111293.1	Eve2
627914	NM_001100415.1	Eve2
628991	NM_001310328.1	Eve2
633093	NR_033570.1	Eve2
636177	NM_001039696.1	Eve2
637578	NM_001270644.1	Eve2
65956	NM_023052.2	Eve2
664608	NM_001039698.1	Eve2
664609	NM_001039688.3	Eve2
664610	NM_001039695.1	Eve2
664726	NM_001039944.2	Eve2
665155	NM_001100109.1	Eve2
665433	NM_001177544.2	Eve2
665622	NM_001110555.1	Eve2
665622	NM_001313878.1	Eve2
665956	NM_001177526.1	Eve2
666040	NM_001242937.1	Eve2
666184	NM_001198988.1	Eve2
666203	NM_001270457.1	Eve2
666731	NM_001177858.1	Eve2
666747	NM_001170884.1	Eve2
667055	NM_001142539.1	Eve2
667129	NM_001166737.1	Eve2
667214	NM_001114679.1	Eve2
667256	NM_001201358.1	Eve2
667259	NM_001166742.1	Eve2
667262	NM_001166743.1	Eve2
667404	NM_001166747.1	Eve2
667464	NM_001166749.1	Eve2
667469	NM_001166750.1	Eve2
667472	NM_001167152.1	Eve2
667485	NM_001166751.1	Eve2
667504	NM_001166752.1	Eve2
667512	NM_001167147.1	Eve2
667543	NM_001167154.1	Eve2
667586	NM_001166755.1	Eve2
667599	NM_001166756.1	Eve2
667692	NM_001270900.1	Eve2
667693	NM_001244649.1	Eve2
668030	NM_001100416.2	Eve2
668108	NR_030719.1	Eve2
668357	NM_001142690.2	Eve2
668357	NM_001310684.1	Eve2
668526	NM_001281524.1	Eve2
668612	NM_001105061.1	Eve2
668727	NM_001172588.1	Eve2
668960	NM_001085552.2	Eve2
668963	NM_001085553.1	Eve2
668964	NM_001085554.1	Eve2
670764	NM_001166757.1	Eve2
673977	NM_001166759.1	Eve2
70005	NR_040355.1	Eve2
735257	NR_030472.1	Eve2
74236	NR_108051.1	Eve2
74851	NM_029106.2	Eve2
78605	NR_040291.1	Eve2
93970	NM_053153.2	Eve2
381714	NM_198666.3	Eve2
100037283	NM_001083938.2	Eve2
100042175	NM_001099347.2	Eve2
100039227	NM_001177538.1	Eve2
100039293	NM_001177539.1	Eve2

## Sheet: indels_PilonedB6Eve2_GRCm38full
#Assembly	TranscriptAccession	NCBIGeneID	GeneSymbol	IndelType
Eve2	NP_001160109.1	100043224	Gm4301	NFS
Eve2	NP_001334083.1	100861909	Gm21320	NFS
Eve2	NP_536705.3	140474	Muc4	NFS
Eve2	NP_032158.2	14659	Glrp1	NFS
Eve2	NP_032199.3	14815	Nr3c1	NFS
Eve2	NP_034525.4	15024	H2-T10	NFS
Eve2	NP_001153428.1	18575	Pde1c	NFS
Eve2	NP_001073158.1	20495	Slc12a1	NFS
Eve2	NP_899197.2	20495	Slc12a1	NFS
Eve2	NP_035604.1	20762	Sprr2h	NFS
Eve2	NP_001008419.1	213043	Aox2	NFS
Eve2	NP_033367.2	21462	Tcp10b	NFS
Eve2	NP_033541.1	22376	Was	NFS
Eve2	NP_035857.2	22446	Xlr3c	NFS
Eve2	NP_001013826.1	229574	Flg2	NFS
Eve2	NP_001074736.1	233532	Rsf1	NFS
Eve2	NP_821172.2	233904	Setd1a	NFS
Eve2	NP_997652.4	332131	Krt78	NFS
Eve2	NP_941054.2	381280	Hjurp	NFS
Eve2	NP_001264096.1	433698	Fam205a1	NFS
Eve2	NP_001004193.1	434768	Rhox8	NFS
Eve2	NP_059086.3	53878	Svs2	NFS
Eve2	NP_001002272.1	56191	Tro	NFS
Eve2	NP_001277699.1	56191	Tro	NFS
Eve2	NP_079696.1	66203	Lce1m	NFS
Eve2	NP_001074942.1	668166	Zxdb	NFS
Eve2	NP_001030065.1	668620	Zfp936	NFS
Eve2	NP_081857.1	70859	Lrrc63	NFS
Eve2	NP_113550.3	72075	Ogfr	NFS
Eve2	NP_780388.2	72345	Amer1	NFS
Eve2	NP_083077.2	74180	Muc5b	NFS
Eve2	NP_001158113.1	76510	Trappc9	NFS
Eve2	NP_001156410.1	100033459	Ifi208	FS
Eve2	NP_001268448.1	100038949	Gm1979	FS
Eve2	NP_001092791.1	100040635	Gm15023	FS
Eve2	NP_001257771.1	100041874	Gm3558	FS
Eve2	NP_001116132.1	100042314	Gm10639	FS
Eve2	NP_001098649.1	100042921	Vmn2r51	FS
Eve2	NP_001160633.1	100042971	Gm10670	FS
Eve2	NP_001171238.1	100043034	Rex2	FS
Eve2	NP_001160106.1	100043227	Gm4302	FS
Eve2	NP_001185800.1	100043836	Scgb2b7	FS
Eve2	NP_001297586.1	100043842	Scgb2b11	FS
Eve2	NP_001231692.1	100126774	Esp18	FS
Eve2	NP_001120660.1	100503584	Zfp534	FS
Eve2	NP_001182197.1	100503659	Cbarp	FS
Eve2	NP_766187.1	100504663	Atg14	FS
Eve2	NP_001297518.1	100972	Rab28	FS
Eve2	NP_001297519.1	100972	Rab28	FS
Eve2	NP_081571.1	100972	Rab28	FS
Eve2	NP_938041.1	102124	Enkd1	FS
Eve2	NP_001297379.1	105242399	LOC105242399	FS
Eve2	NP_109618.1	107503	Atf5	FS
Eve2	NP_082542.3	107581	Col16a1	FS
Eve2	NP_001186141.1	107626	Asmt	FS
Eve2	NP_001295417.1	107626	Asmt	FS
Eve2	NP_001298058.1	107849	Prl2c5	FS
Eve2	NP_862900.1	107849	Prl2c5	FS
Eve2	NP_081105.1	107885	Mthfs	FS
Eve2	NP_001273502.1	110147	Ehmt2	FS
Eve2	NP_665829.1	110147	Ehmt2	FS
Eve2	NP_001074881.1	110279	Bcr	FS
Eve2	NP_001334100.1	110962	Mbd6	FS
Eve2	NP_149063.2	110962	Mbd6	FS
Eve2	NP_659544.2	112422	Zfp979	FS
Eve2	NP_033726.1	11354	Scgb1b27	FS
Eve2	NP_444478.2	114479	Slc5a5	FS
Eve2	NP_473404.3	114871	Psg28	FS
Eve2	NP_001257925.1	11502	Adam9	FS
Eve2	NP_001102515.1	11833	Aqp8	FS
Eve2	NP_031500.1	11833	Aqp8	FS
Eve2	NP_033910.2	12268	C4b	FS
Eve2	NP_033962.2	12454	Ccnk	FS
Eve2	NP_001276378.1	12480	Cd1d2	FS
Eve2	NP_031666.2	12480	Cd1d2	FS
Eve2	NP_001155096.1	12577	Cdkn1c	FS
Eve2	NP_001341910.1	12577	Cdkn1c	FS
Eve2	NP_034006.3	12577	Cdkn1c	FS
Eve2	NP_001269922.1	12808	Cobl	FS
Eve2	NP_001269923.1	12808	Cobl	FS
Eve2	NP_766084.3	12808	Cobl	FS
Eve2	NP_001264148.1	12928	Crk	FS
Eve2	NP_001264150.1	12928	Crk	FS
Eve2	NP_598417.2	12928	Crk	FS
Eve2	NP_034127.2	13086	Cyp2a4	FS
Eve2	NP_031844.1	13112	Cyp3a11	FS
Eve2	NP_058670.2	13170	Dbp	FS
Eve2	NP_031877.2	13239	Defa5	FS
Eve2	NP_001003817.1	13866	Erbb2	FS
Eve2	NP_536705.3	140474	Muc4	FS
Eve2	NP_034348.2	14221	Fjx1	FS
Eve2	NP_001153016.1	14302	Frk	FS
Eve2	NP_034367.2	14302	Frk	FS
Eve2	NP_032158.2	14659	Glrp1	FS
Eve2	NP_034525.4	15024	H2-T10	FS
Eve2	NP_034532.3	15111	Hand2	FS
Eve2	NP_001091673.1	15248	Hic1	FS
Eve2	NP_034560.2	15248	Hic1	FS
Eve2	NP_032291.1	15401	Hoxa4	FS
Eve2	NP_034583.1	15402	Hoxa5	FS
Eve2	NP_032295.1	15414	Hoxb6	FS
Eve2	NP_034608.2	15511	Hspa1b	FS
Eve2	NP_001289578.1	15950	Ifi203	FS
Eve2	NP_001289579.1	15950	Ifi203	FS
Eve2	NP_001289580.1	15950	Ifi203	FS
Eve2	NP_032355.2	15951	Ifi204	FS
Eve2	NP_034722.1	16478	Jund	FS
Eve2	NP_032446.2	16500	Kcnb1	FS
Eve2	NP_032539.2	16973	Lrp5	FS
Eve2	NP_001104782.1	16978	Lrrfip1	FS
Eve2	NP_976220.2	17005	Ltk	FS
Eve2	NP_996825.2	17005	Ltk	FS
Eve2	NP_598956.2	171229	Vmn1r227	FS
Eve2	NP_064399.1	17137	Magea1	FS
Eve2	NP_034912.3	17232	Mcpt9	FS
Eve2	NP_001155296.1	17827	Mtx1	FS
Eve2	NP_038632.2	17827	Mtx1	FS
Eve2	NP_076055.3	17831	Muc2	FS
Eve2	NP_032672.2	17837	Mug2	FS
Eve2	NP_963894.1	17919	Myo5b	FS
Eve2	NP_001032254.1	18019	Nfatc2	FS
Eve2	NP_001129545.1	18019	Nfatc2	FS
Eve2	NP_001278097.1	18019	Nfatc2	FS
Eve2	NP_001278098.1	18019	Nfatc2	FS
Eve2	NP_001278101.1	18019	Nfatc2	FS
Eve2	NP_035029.2	18019	Nfatc2	FS
Eve2	NP_035039.1	18038	Nfkbil1	FS
Eve2	NP_001153428.1	18575	Pde1c	FS
Eve2	NP_035219.2	18725	Pira2	FS
Eve2	NP_001076000.1	18780	Pla2g2a	FS
Eve2	NP_035271.1	18991	Pou3f1	FS
Eve2	NP_035304.4	19131	Prh1	FS
Eve2	NP_035314.3	19167	Psma3	FS
Eve2	NP_001299832.1	19207	Ptch2	FS
Eve2	NP_032984.1	19207	Ptch2	FS
Eve2	NP_619606.1	192166	Sardh	FS
Eve2	NP_001075121.1	192950	Nacad	FS
Eve2	NP_033017.2	19299	Abcd3	FS
Eve2	NP_001257404.1	194401	Mical3	FS
Eve2	NP_001028405.1	194597	Tmprss11a	FS
Eve2	NP_001123928.1	20359	Sema6b	FS
Eve2	NP_038690.1	20359	Sema6b	FS
Eve2	NP_033200.2	20439	Siah2	FS
Eve2	NP_035507.2	20465	Sim2	FS
Eve2	NP_033234.2	20536	Slc4a3	FS
Eve2	NP_035538.1	20556	Slfn2	FS
Eve2	NP_001240833.1	20602	Ncor2	FS
Eve2	NP_001240834.1	20602	Ncor2	FS
Eve2	NP_035554.3	20602	Ncor2	FS
Eve2	NP_033263.2	20675	Sox3	FS
Eve2	NP_033271.1	20702	Serpina1c	FS
Eve2	NP_899020.1	20709	Serpinb9f	FS
Eve2	NP_789820.2	207165	Bptf	FS
Eve2	NP_001106844.2	210274	Shank2	FS
Eve2	NP_001297703.1	211147	March11	FS
Eve2	NP_808265.2	211147	March11	FS
Eve2	NP_001192102.1	212632	Iffo2	FS
Eve2	NP_001008419.1	213043	Aox2	FS
Eve2	NP_717095.2	213211	Rnf26	FS
Eve2	NP_001243360.1	213990	Agap3	FS
Eve2	NP_631892.2	213990	Agap3	FS
Eve2	NP_001074518.1	214162	Kmt2a	FS
Eve2	NP_659068.1	215707	Ccdc92	FS
Eve2	NP_001028434.1	216438	March9	FS
Eve2	NP_033370.2	21664	Phlda1	FS
Eve2	NP_001272427.1	21677	Tead2	FS
Eve2	NP_001272429.1	21677	Tead2	FS
Eve2	NP_035695.1	21677	Tead2	FS
Eve2	NP_059072.1	21685	Tef	FS
Eve2	NP_001017426.1	216850	Kdm6b	FS
Eve2	NP_001333698.1	217198	Plekhh3	FS
Eve2	NP_666142.1	217198	Plekhh3	FS
Eve2	NP_001269016.1	22068	Trpc6	FS
Eve2	NP_062613.3	22190	Ubc	FS
Eve2	NP_033511.1	22300	Vmn2r123	FS
Eve2	NP_033514.2	22308	Vmn2r122	FS
Eve2	NP_033518.2	22308	Vmn2r122	FS
Eve2	NP_001074771.1	223435	Trio	FS
Eve2	NP_659097.2	223650	Eppk1	FS
Eve2	NP_035857.2	22446	Xlr3c	FS
Eve2	NP_722486.2	224613	Flywch1	FS
Eve2	NP_038882.1	224742	Abcf1	FS
Eve2	NP_001074872.1	225266	Klhl14	FS
Eve2	NP_001276583.1	225288	Fhod3	FS
Eve2	NP_001276584.1	225288	Fhod3	FS
Eve2	NP_780485.2	225288	Fhod3	FS
Eve2	NP_848806.2	226418	Yod1	FS
Eve2	NP_001153106.1	227723	Prrc2b	FS
Eve2	NP_766249.2	227723	Prrc2b	FS
Eve2	NP_001011732.1	228787	Xkr7	FS
Eve2	NP_808328.2	229055	Zbtb10	FS
Eve2	NP_001078974.1	230909	Gm572	FS
Eve2	NP_659162.3	231803	Mepce	FS
Eve2	NP_001019870.1	232879	Zbtb45	FS
Eve2	NP_001334587.1	233871	Atxn2l	FS
Eve2	NP_898841.1	233871	Atxn2l	FS
Eve2	NP_766360.2	235461	Mindy2	FS
Eve2	NP_703189.3	235584	Dusp7	FS
Eve2	NP_035925.2	23829	C1ql1	FS
Eve2	NP_001020950.1	23834	Cdc6	FS
Eve2	NP_035929.1	23834	Cdc6	FS
Eve2	NP_035944.2	23879	Fxr2	FS
Eve2	NP_001034287.1	239102	Zfhx2	FS
Eve2	NP_766421.1	240354	Malt1	FS
Eve2	NP_766424.2	240613	9930021J03Rik	FS
Eve2	NP_001075113.1	242502	Gm428	FS
Eve2	NP_001075120.1	242681	Rab42	FS
Eve2	NP_796356.2	244209	Cyp2r1	FS
Eve2	NP_653140.1	245049	Myrip	FS
Eve2	NP_997032.2	258255	Olfr1010	FS
Eve2	NP_666695.1	258477	Olfr197	FS
Eve2	NP_667083.1	258872	Olfr908	FS
Eve2	NP_667224.1	259015	Olfr1038-ps	FS
Eve2	NP_667260.1	259051	Olfr658	FS
Eve2	NP_112152.1	260297	Prrt1	FS
Eve2	NP_694751.1	260298	Fev	FS
Eve2	NP_001157744.1	269061	Cpsf7	FS
Eve2	NP_758506.3	269061	Cpsf7	FS
Eve2	NP_001292733.1	269614	Pank4	FS
Eve2	NP_766578.2	269614	Pank4	FS
Eve2	NP_766596.1	269855	Ssc5d	FS
Eve2	NP_001334056.1	270028	Fam155a	FS
Eve2	NP_775622.1	270028	Fam155a	FS
Eve2	NP_899017.2	270328	Gsdmc3	FS
Eve2	NP_001036082.1	27062	Cadps	FS
Eve2	NP_036191.2	27062	Cadps	FS
Eve2	NP_001074635.2	271305	Phf21b	FS
Eve2	NP_808442.2	272009	Srsf12	FS
Eve2	NP_001263361.1	277343	Wfdc8	FS
Eve2	NP_777366.1	317755	Zar1	FS
Eve2	NP_922871.1	319146	Ifnz	FS
Eve2	NP_796200.1	320683	Zfp629	FS
Eve2	NP_001007580.1	329986	BC080695	FS
Eve2	NP_001161332.1	330319	Wipf3	FS
Eve2	NP_001161333.1	330319	Wipf3	FS
Eve2	NP_808551.2	330323	Mindy4	FS
Eve2	NP_899143.2	331529	Gm5128	FS
Eve2	NP_079961.3	373864	Col27a1	FS
Eve2	NP_001074662.2	380664	Lemd3	FS
Eve2	NP_001005371.2	381569	Gm13084	FS
Eve2	NP_941069.1	381724	BC061212	FS
Eve2	NP_001005511.2	381983	Lmtk3	FS
Eve2	NP_001277919.1	381983	Lmtk3	FS
Eve2	NP_001013423.2	382117	Tcaim	FS
Eve2	NP_001035759.1	382277	Gm5169	FS
Eve2	NP_997432.1	404309	Olfr192	FS
Eve2	NP_997547.1	406176	Olfr151	FS
Eve2	NP_001230817.1	414069	BC024978	FS
Eve2	NP_001277440.1	414069	BC024978	FS
Eve2	NP_001277442.1	414069	BC024978	FS
Eve2	NP_001003666.2	431706	Zfp457	FS
Eve2	NP_001004180.1	433940	Fam222a	FS
Eve2	NP_001098540.1	434110	Vmn2r38	FS
Eve2	NP_001013832.1	434171	Gm5591	FS
Eve2	NP_001078993.1	434726	Fthl17b	FS
Eve2	NP_001075138.2	434760	Rhox2d	FS
Eve2	NP_001093655.1	435802	Cyp4a30b	FS
Eve2	NP_001098091.1	435864	Vmn2r9	FS
Eve2	NP_001160184.1	435947	Vmn1r151	FS
Eve2	NP_001153124.1	436090	Gpr62	FS
Eve2	NP_001160188.1	436135	Vmn1r113	FS
Eve2	NP_056615.1	50766	Crim1	FS
Eve2	NP_056645.1	50817	Capn15	FS
Eve2	NP_001156490.1	52615	Suz12	FS
Eve2	NP_954666.1	52615	Suz12	FS
Eve2	NP_058069.1	53324	Nptx2	FS
Eve2	NP_001157884.1	53621	Cnot4	FS
Eve2	NP_001157885.1	53621	Cnot4	FS
Eve2	NP_001157886.1	53621	Cnot4	FS
Eve2	NP_001019890.1	545288	Cyp2c67	FS
Eve2	NP_001268454.1	545739	Gm5862	FS
Eve2	NP_061284.2	54604	Pcnx	FS
Eve2	NP_001277503.1	54646	Ppp1r3f	FS
Eve2	NP_613071.3	54646	Ppp1r3f	FS
Eve2	NP_001098105.1	546912	Vmn2r21	FS
Eve2	NP_001160193.1	546943	Vmn1r176	FS
Eve2	NP_001098529.1	546964	Vmn2r62	FS
Eve2	NP_062527.2	56055	Gtpbp2	FS
Eve2	NP_062367.1	56066	Cxcl11	FS
Eve2	NP_001002272.1	56191	Tro	FS
Eve2	NP_001277699.1	56191	Tro	FS
Eve2	NP_001171458.1	56364	Zmym3	FS
Eve2	NP_001161697.1	56397	Morf4l2	FS
Eve2	NP_001161698.1	56397	Morf4l2	FS
Eve2	NP_001161699.1	56397	Morf4l2	FS
Eve2	NP_001161700.1	56397	Morf4l2	FS
Eve2	NP_001161701.1	56397	Morf4l2	FS
Eve2	NP_001161702.1	56397	Morf4l2	FS
Eve2	NP_062742.4	56397	Morf4l2	FS
Eve2	NP_001034436.1	56543	Kcnd3	FS
Eve2	NP_064315.1	56543	Kcnd3	FS
Eve2	NP_064314.2	56705	Ranbp9	FS
Eve2	NP_067279.2	57742	Abhd1	FS
Eve2	NP_067285.2	57748	Jmy	FS
Eve2	NP_068563.2	60425	Doc2g	FS
Eve2	NP_001074611.1	60613	Kcnq4	FS
Eve2	NP_001116133.1	624245	Speer4e	FS
Eve2	NP_001034737.2	639910	Gm20767	FS
Eve2	NP_075363.1	65100	Zic5	FS
Eve2	NP_001135394.1	65115	Bean1	FS
Eve2	NP_001103213.1	664805	Skor2	FS
Eve2	NP_067336.1	664883	Nova1	FS
Eve2	NP_001074874.1	665255	Vmn2r28	FS
Eve2	NP_001075215.1	665378	Gm7609	FS
Eve2	NP_001172102.1	665780	Zscan4b	FS
Eve2	NP_001038997.1	666317	Prl2c1	FS
Eve2	NP_001229870.2	666329	Gm3317	FS
Eve2	NP_001074884.1	666704	Samd1	FS
Eve2	NP_001160208.1	667067	Vmn1r91	FS
Eve2	NP_001153382.1	668158	Ccdc85c	FS
Eve2	NP_001074942.1	668166	Zxdb	FS
Eve2	NP_001030065.1	668620	Zfp936	FS
Eve2	NP_080153.2	66972	Slc25a23	FS
Eve2	NP_080264.1	67131	Acbd4	FS
Eve2	NP_663431.2	67263	Zswim6	FS
Eve2	NP_080414.2	67412	Soga3	FS
Eve2	NP_001107568.1	68094	Smarcc2	FS
Eve2	NP_001107569.1	68094	Smarcc2	FS
Eve2	NP_937803.1	68094	Smarcc2	FS
Eve2	NP_080877.3	68180	Hyi	FS
Eve2	NP_077184.2	68292	Stt3b	FS
Eve2	NP_598459.2	68723	Hrnr	FS
Eve2	NP_001157696.1	68938	Aspscr1	FS
Eve2	NP_081153.1	68938	Aspscr1	FS
Eve2	NP_937866.1	68938	Aspscr1	FS
Eve2	NP_001096033.1	69017	Prrt2	FS
Eve2	NP_081325.1	69349	1700008O03Rik	FS
Eve2	NP_848733.2	69640	Fam83g	FS
Eve2	NP_598483.2	70178	Abhd17c	FS
Eve2	NP_001272834.1	70233	Cd2bp2	FS
Eve2	NP_001272835.1	70233	Cd2bp2	FS
Eve2	NP_001272836.1	70233	Cd2bp2	FS
Eve2	NP_081629.1	70233	Cd2bp2	FS
Eve2	NP_940803.2	70435	Inf2	FS
Eve2	NP_473383.1	70445	Cd248	FS
Eve2	NP_081728.2	70530	Lrfn2	FS
Eve2	NP_082078.1	71468	Obox1	FS
Eve2	NP_001334511.1	72205	Eml2	FS
Eve2	NP_001025061.2	72640	Mex3a	FS
Eve2	NP_001229996.1	73610	Zfp433	FS
Eve2	NP_001254801.1	73884	Zdbf2	FS
Eve2	NP_001272865.1	73884	Zdbf2	FS
Eve2	NP_001272866.1	73884	Zdbf2	FS
Eve2	NP_082949.1	73884	Zdbf2	FS
Eve2	NP_083000.5	74030	Rin2	FS
Eve2	NP_001264050.1	74326	Hnrnpr	FS
Eve2	NP_001264051.1	74326	Hnrnpr	FS
Eve2	NP_001264052.1	74326	Hnrnpr	FS
Eve2	NP_083147.1	74326	Hnrnpr	FS
Eve2	NP_083177.2	74376	Myo18b	FS
Eve2	NP_001258515.1	74684	4930451G09Rik	FS
Eve2	NP_083359.1	74747	Ddit4	FS
Eve2	NP_083392.1	74901	Kbtbd11	FS
Eve2	NP_001074762.1	75137	Rprd2	FS
Eve2	NP_001277502.1	75410	Kmt2b	FS
Eve2	NP_083550.2	75410	Kmt2b	FS
Eve2	NP_001029047.1	76701	Ctrc	FS
Eve2	NP_076401.1	78891	Scyl1	FS
Eve2	NP_112148.2	81702	Ankrd17	FS
Eve2	NP_932127.2	81702	Ankrd17	FS
Eve2	NP_112551.2	83457	Fthl17e	FS
Eve2	NP_663476.1	84095	Pi4k2a	FS
Eve2	NP_149031.2	85030	Tnfrsf25	FS
Eve2	NP_444336.2	93689	Lmod1	FS
Eve2	NP_291051.1	94315	Prcc	FS
Eve2	NP_067375.3	96875	Prg4	FS
Eve2	NP_001028361.1	97130	C77080	FS
GRCm38	NP_001182659.1	100504491	Dcdc2b	NFS
GRCm38	NP_057915.2	12812	Coil	NFS
GRCm38	NP_031771.1	12854	Cort	NFS
GRCm38	NP_001186662.1	13163	Daxx	NFS
GRCm38	NP_031855.3	13163	Daxx	NFS
GRCm38	NP_059065.2	14404	Gabre	NFS
GRCm38	NP_996988.2	14961	H2-Ab1	NFS
GRCm38	NP_034525.4	15024	H2-T10	NFS
GRCm38	NP_001334311.1	15039	H2-T22	NFS
GRCm38	NP_034527.1	15039	H2-T22	NFS
GRCm38	NP_034608.2	15511	Hspa1b	NFS
GRCm38	NP_032392.1	16183	Il2	NFS
GRCm38	NP_001268909.1	16970	Lrmp	NFS
GRCm38	NP_001268910.1	16970	Lrmp	NFS
GRCm38	NP_032537.3	16970	Lrmp	NFS
GRCm38	NP_035190.3	18601	Padi3	NFS
GRCm38	NP_035191.2	18602	Padi4	NFS
GRCm38	NP_001276806.1	18628	Per3	NFS
GRCm38	NP_001276807.1	18628	Per3	NFS
GRCm38	NP_035197.2	18628	Per3	NFS
GRCm38	NP_001073158.1	20495	Slc12a1	NFS
GRCm38	NP_899197.2	20495	Slc12a1	NFS
GRCm38	NP_035660.3	21355	Tap2	NFS
GRCm38	NP_001070976.1	21942	Tnfrsf9	NFS
GRCm38	NP_001070977.1	21942	Tnfrsf9	NFS
GRCm38	NP_035742.1	21942	Tnfrsf9	NFS
GRCm38	NP_001277249.1	224661	Slc26a8	NFS
GRCm38	NP_038882.1	224742	Abcf1	NFS
GRCm38	NP_001191839.1	226691	Ifi207	NFS
GRCm38	NP_001020770.2	22670	Trim26	NFS
GRCm38	NP_001273655.1	22670	Trim26	NFS
GRCm38	NP_001273656.1	22670	Trim26	NFS
GRCm38	NP_001013826.1	229574	Flg2	NFS
GRCm38	NP_932143.2	230767	Iqcc	NFS
GRCm38	NP_001186625.1	230775	Adgrb2	NFS
GRCm38	NP_001277643.1	230775	Adgrb2	NFS
GRCm38	NP_001277644.1	230775	Adgrb2	NFS
GRCm38	NP_775094.2	230775	Adgrb2	NFS
GRCm38	NP_001276608.1	272322	Arntl2	NFS
GRCm38	NP_001276609.1	272322	Arntl2	NFS
GRCm38	NP_001276610.1	272322	Arntl2	NFS
GRCm38	NP_758513.1	272322	Arntl2	NFS
GRCm38	NP_001039328.1	27632	Nelfe	NFS
GRCm38	NP_001039329.1	27632	Nelfe	NFS
GRCm38	NP_613046.2	27632	Nelfe	NFS
GRCm38	NP_839991.2	280287	Kiss1	NFS
GRCm38	NP_796129.2	320407	Klri2	NFS
GRCm38	NP_001008424.2	386463	Cdsn	NFS
GRCm38	NP_001001177.2	407788	BC051142	NFS
GRCm38	NP_001157327.1	407788	BC051142	NFS
GRCm38	NP_001121158.1	436003	Hbb-bh2	NFS
GRCm38	NP_001035786.1	637515	Nlrp1b	NFS
GRCm38	NP_001155886.1	637515	Nlrp1b	NFS
GRCm38	NP_081335.1	69371	Smco2	NFS
GRCm38	NP_001152816.1	69743	Casz1	NFS
GRCm38	NP_001013044.2	74044	Ttf2	NFS
GRCm38	NP_083878.1	76416	Znrd1as	NFS
GRCm38	NP_001341682.1	100310809	Gm10509	FS
GRCm38	NP_536705.3	140474	Muc4	FS
GRCm38	NP_034525.4	15024	H2-T10	FS
GRCm38	NP_032290.1	15398	Hoxa13	FS
GRCm38	NP_001076657.1	16881	Lig1	FS
GRCm38	NP_001186239.1	16881	Lig1	FS
GRCm38	NP_034845.2	16881	Lig1	FS
GRCm38	NP_598956.2	171229	Vmn1r227	FS
GRCm38	NP_035059.2	18132	Notch4	FS
GRCm38	NP_680088.1	20388	Sftpb	FS
GRCm38	NP_001034136.1	216781	Trim58	FS
GRCm38	NP_766297.2	21906	Otop1	FS
GRCm38	NP_001091092.1	224829	Trerf1	FS
GRCm38	NP_766210.1	224829	Trerf1	FS
GRCm38	NP_001191839.1	226691	Ifi207	FS
GRCm38	NP_001013826.1	229574	Flg2	FS
GRCm38	NP_001078974.1	230909	Gm572	FS
GRCm38	NP_001288770.1	242669	Azin2	FS
GRCm38	NP_001005481.1	257889	Olfr132	FS
GRCm38	NP_997032.2	258255	Olfr1010	FS
GRCm38	NP_666695.1	258477	Olfr197	FS
GRCm38	NP_667083.1	258872	Olfr908	FS
GRCm38	NP_667224.1	259015	Olfr1038-ps	FS
GRCm38	NP_032353.2	26388	Ifi202b	FS
GRCm38	NP_036070.2	26388	Ifi202b	FS
GRCm38	NP_071295.2	26403	Map3k11	FS
GRCm38	NP_796021.2	319974	Auts2	FS
GRCm38	NP_796286.2	321008	Zswim9	FS
GRCm38	NP_001007223.2	399673	Tdpoz2	FS
GRCm38	NP_997432.1	404309	Olfr192	FS
GRCm38	NP_997547.1	406176	Olfr151	FS
GRCm38	NP_067402.2	58238	Fam181b	FS
GRCm38	NP_035543.2	625018	C4a	FS
GRCm38	NP_001035786.1	637515	Nlrp1b	FS
GRCm38	NP_001155886.1	637515	Nlrp1b	FS
GRCm38	NP_075552.2	65972	Ifi30	FS
GRCm38	NP_079852.1	66461	Ptpmt1	FS
GRCm38	NP_001072117.1	66990	Tmem134	FS
GRCm38	NP_080165.1	66990	Tmem134	FS
GRCm38	NP_080264.1	67131	Acbd4	FS
GRCm38	NP_663431.2	67263	Zswim6	FS
GRCm38	NP_080762.1	67978	Tctn2	FS
GRCm38	NP_001035485.2	68646	Nadk2	FS
GRCm38	NP_001078879.1	68646	Nadk2	FS
GRCm38	NP_001273182.1	68646	Nadk2	FS
GRCm38	NP_001273184.1	68646	Nadk2	FS
GRCm38	NP_001078854.1	72244	1600014C10Rik	FS
GRCm38	NP_082442.1	72244	1600014C10Rik	FS
GRCm38	NP_796235.4	76484	Kndc1	FS
GRCm38	NP_001188270.1	76626	Msi2	FS
GRCm38	NP_001029047.1	76701	Ctrc	FS
GRCm38	NP_114395.1	83995	Mmp1a	FS
